# Supplementary material for: Deciphering the Diversity of Bacterial Transporters that Salvage Queuosine Precursors
Source: Preprints.org preprint supplement (doi:10.20944/preprints202403.0245.v1), 2024-03-05
Supplement: Supplementary file 1 [file Table_S1-9_0304YY.xlsx]

## Sheet: S1
Table S1. Candidates of transporter from fusion search in Uniprot database.
Entry Name	Protein names	Gene Names	Organism	Length	Transmembrane	InterPro	Pfam	CDD
A0A3P8K0X0_TSUPA	Queuine tRNA-ribosyltransferase (EC 2.4.2.29) (Guanine insertion enzyme) (tRNA-guanine transglycosylase)	tgt_1 tgt NCTC10741_01831	Tsukamurella paurometabola (Corynebacterium paurometabolum)	1383	TRANSMEM 237..257; /note="Helical"; /evidence="ECO:0000256|SAM:Phobius"; TRANSMEM 264..282; /note="Helical"; /evidence="ECO:0000256|SAM:Phobius"; TRANSMEM 288..308; /note="Helical"; /evidence="ECO:0000256|SAM:Phobius"; TRANSMEM 329..358; /note="Helical"; /evidence="ECO:0000256|SAM:Phobius"; TRANSMEM 370..392; /note="Helical"; /evidence="ECO:0000256|SAM:Phobius"; TRANSMEM 429..448; /note="Helical"…	IPR004869;IPR004803;IPR036511;IPR002616;	PF03176 MMPL MMPL;PF01702 TGT;
A0A1H1B2L5_9ACTN	Queuine tRNA-ribosyltransferase (EC 2.4.2.29) (Guanine insertion enzyme) (tRNA-guanine transglycosylase)	tgt SAMN04489765_0508	Tsukamurella pulmonis	1398	TRANSMEM 241..261; /note="Helical"; /evidence="ECO:0000256|SAM:Phobius"; TRANSMEM 268..286; /note="Helical"; /evidence="ECO:0000256|SAM:Phobius"; TRANSMEM 292..312; /note="Helical"; /evidence="ECO:0000256|SAM:Phobius"; TRANSMEM 333..362; /note="Helical"; /evidence="ECO:0000256|SAM:Phobius"; TRANSMEM 374..396; /note="Helical"; /evidence="ECO:0000256|SAM:Phobius"; TRANSMEM 433..452; /note="Helical"…	IPR004869;IPR004803;IPR036511;IPR002616;	PF03176 MMPL;PF01702 TGT;
A0A1H5C6U4_TSUTY	Queuine tRNA-ribosyltransferase (EC 2.4.2.29) (Guanine insertion enzyme) (tRNA-guanine transglycosylase)	tgt SAMN04489793_5322	Tsukamurella tyrosinosolvens	1390	TRANSMEM 237..257; /note="Helical"; /evidence="ECO:0000256|SAM:Phobius"; TRANSMEM 264..282; /note="Helical"; /evidence="ECO:0000256|SAM:Phobius"; TRANSMEM 288..308; /note="Helical"; /evidence="ECO:0000256|SAM:Phobius"; TRANSMEM 329..358; /note="Helical"; /evidence="ECO:0000256|SAM:Phobius"; TRANSMEM 370..392; /note="Helical"; /evidence="ECO:0000256|SAM:Phobius"; TRANSMEM 596..615; /note="Helical"…	IPR004869;IPR004803;IPR036511;IPR002616;	PF03176 MMPL;PF01702 TGT;
D5UNC0_TSUPD	Queuine tRNA-ribosyltransferase (EC 2.4.2.29) (Guanine insertion enzyme) (tRNA-guanine transglycosylase)	tgt Tpau_4044	Tsukamurella paurometabola (strain ATCC 8368 / DSM 20162 / CCUG 35730 / CIP 100753 / JCM 10117 / KCTC 9821 / NBRC 16120 / NCIMB 702349 / NCTC 13040) (Corynebacterium paurometabolum)	1382	TRANSMEM 238..258; /note="Helical"; /evidence="ECO:0000256|SAM:Phobius"; TRANSMEM 265..283; /note="Helical"; /evidence="ECO:0000256|SAM:Phobius"; TRANSMEM 289..309; /note="Helical"; /evidence="ECO:0000256|SAM:Phobius"; TRANSMEM 330..359; /note="Helical"; /evidence="ECO:0000256|SAM:Phobius"; TRANSMEM 371..393; /note="Helical"; /evidence="ECO:0000256|SAM:Phobius"; TRANSMEM 598..617; /note="Helical"…	IPR004869;IPR000731;IPR004803;IPR036511;IPR002616;	PF03176 MMPL;PF01702 TGT;
A0A1H1C539_9ACTN	Drug resistance transporter, EmrB/QacA subfamily	SAMN04489765_1025	Tsukamurella pulmonis	982	TRANSMEM 12..38; /note="Helical"; /evidence="ECO:0000256|SAM:Phobius"; TRANSMEM 50..69; /note="Helical"; /evidence="ECO:0000256|SAM:Phobius"; TRANSMEM 81..100; /note="Helical"; /evidence="ECO:0000256|SAM:Phobius"; TRANSMEM 106..127; /note="Helical"; /evidence="ECO:0000256|SAM:Phobius"; TRANSMEM 139..163; /note="Helical"; /evidence="ECO:0000256|SAM:Phobius"; TRANSMEM 169..189; /note="Helical"; /ev…	IPR011701;IPR020846;IPR036259;IPR036511;IPR002616;	PF07690 MFS_1;PF01702 TGT;	cd17321;
A0A3P8L0P7_TSUPA	Multidrug-efflux transporter 3	bmr3_2 NCTC10741_01047	Tsukamurella paurometabola (Corynebacterium paurometabolum)	1026	TRANSMEM 26..51; /note="Helical"; /evidence="ECO:0000256|SAM:Phobius"; TRANSMEM 63..82; /note="Helical"; /evidence="ECO:0000256|SAM:Phobius"; TRANSMEM 94..113; /note="Helical"; /evidence="ECO:0000256|SAM:Phobius"; TRANSMEM 119..140; /note="Helical"; /evidence="ECO:0000256|SAM:Phobius"; TRANSMEM 152..174; /note="Helical"; /evidence="ECO:0000256|SAM:Phobius"; TRANSMEM 186..208; /note="Helical"; /ev…	IPR004638;IPR011701;IPR020846;IPR036259;IPR036511;IPR002616;	PF07690 MFS_1;PF01702 TGT;	cd17502;
A0A5C5RZC4_9ACTN	tRNA-guanine transglycosylase (EC 2.4.2.-)	FK530_12705	Tsukamurella conjunctivitidis	1193	TRANSMEM 187..208; /note="Helical"; /evidence="ECO:0000256|SAM:Phobius"; TRANSMEM 215..234; /note="Helical"; /evidence="ECO:0000256|SAM:Phobius"; TRANSMEM 240..258; /note="Helical"; /evidence="ECO:0000256|SAM:Phobius"; TRANSMEM 279..302; /note="Helical"; /evidence="ECO:0000256|SAM:Phobius"; TRANSMEM 314..337; /note="Helical"; /evidence="ECO:0000256|SAM:Phobius"; TRANSMEM 373..391; /note="Helical"…	IPR004869;IPR000731;IPR036511;IPR002616;	PF03176 MMPL;PF01702 TGT;
A0A6N8U7W4_9FIRM	Probable queuosine precursor transporter (Q precursor transporter)	tgt GSF08_08980	Copranaerobaculum intestinale	615	TRANSMEM 9..27; /note="Helical"; /evidence="ECO:0000256|HAMAP-Rule:MF_02088"; TRANSMEM 33..55; /note="Helical"; /evidence="ECO:0000256|HAMAP-Rule:MF_02088"; TRANSMEM 67..90; /note="Helical"; /evidence="ECO:0000256|HAMAP-Rule:MF_02088"; TRANSMEM 110..129; /note="Helical"; /evidence="ECO:0000256|HAMAP-Rule:MF_02088"; TRANSMEM 150..170; /note="Helical"; /evidence="ECO:0000256|HAMAP-Rule:MF_02088"; T…	IPR004803;IPR036511;IPR002616;IPR003744;	PF01702 TGT;PF02592 Vut_1;
A0A7W8D4S3_9FIRM	Probable queuosine precursor transporter (Q precursor transporter)	HNQ43_001589	Faecalicoccus acidiformans	615	TRANSMEM 36..56; /note="Helical"; /evidence="ECO:0000256|HAMAP-Rule:MF_02088"; TRANSMEM 68..90; /note="Helical"; /evidence="ECO:0000256|HAMAP-Rule:MF_02088"; TRANSMEM 110..132; /note="Helical"; /evidence="ECO:0000256|HAMAP-Rule:MF_02088"; TRANSMEM 152..174; /note="Helical"; /evidence="ECO:0000256|HAMAP-Rule:MF_02088"	IPR004803;IPR036511;IPR002616;IPR003744;	PF01702 TGT;PF02592 Vut_1;
A0A138ABS4_9ACTN	SSD domain-containing protein	AXK60_09310	Tsukamurella pseudospumae	1183	TRANSMEM 187..208; /note="Helical"; /evidence="ECO:0000256|SAM:Phobius"; TRANSMEM 215..234; /note="Helical"; /evidence="ECO:0000256|SAM:Phobius"; TRANSMEM 240..258; /note="Helical"; /evidence="ECO:0000256|SAM:Phobius"; TRANSMEM 279..302; /note="Helical"; /evidence="ECO:0000256|SAM:Phobius"; TRANSMEM 314..337; /note="Helical"; /evidence="ECO:0000256|SAM:Phobius"; TRANSMEM 526..545; /note="Helical"…	IPR004869;IPR000731;IPR036511;IPR002616;	PF03176 MMPL;PF01702 TGT;
A0A1H1GP91_9ACTN	tRNA-guanine family transglycosylase	SAMN04489765_3471	Tsukamurella pulmonis	1199	TRANSMEM 187..208; /note="Helical"; /evidence="ECO:0000256|SAM:Phobius"; TRANSMEM 215..234; /note="Helical"; /evidence="ECO:0000256|SAM:Phobius"; TRANSMEM 240..258; /note="Helical"; /evidence="ECO:0000256|SAM:Phobius"; TRANSMEM 279..302; /note="Helical"; /evidence="ECO:0000256|SAM:Phobius"; TRANSMEM 314..337; /note="Helical"; /evidence="ECO:0000256|SAM:Phobius"; TRANSMEM 373..391; /note="Helical"…	IPR004869;IPR000731;IPR036511;IPR002616;	PF03176 MMPL;PF01702 TGT;
A0A1H1HJ22_9ACTN	Drug resistance transporter, EmrB/QacA subfamily	SAMN04489765_4257	Tsukamurella pulmonis	1047	TRANSMEM 21..46; /note="Helical"; /evidence="ECO:0000256|SAM:Phobius"; TRANSMEM 58..77; /note="Helical"; /evidence="ECO:0000256|SAM:Phobius"; TRANSMEM 89..108; /note="Helical"; /evidence="ECO:0000256|SAM:Phobius"; TRANSMEM 114..135; /note="Helical"; /evidence="ECO:0000256|SAM:Phobius"; TRANSMEM 147..169; /note="Helical"; /evidence="ECO:0000256|SAM:Phobius"; TRANSMEM 181..203; /note="Helical"; /ev…	IPR004638;IPR011701;IPR020846;IPR036259;IPR036511;IPR002616;	PF07690 MFS_1;PF01702 TGT;	cd17502;
A0A1H4M6N2_TSUTY	Drug resistance transporter, EmrB/QacA subfamily	SAMN04489793_0789	Tsukamurella tyrosinosolvens	1021	TRANSMEM 21..46; /note="Helical"; /evidence="ECO:0000256|SAM:Phobius"; TRANSMEM 58..77; /note="Helical"; /evidence="ECO:0000256|SAM:Phobius"; TRANSMEM 89..108; /note="Helical"; /evidence="ECO:0000256|SAM:Phobius"; TRANSMEM 114..135; /note="Helical"; /evidence="ECO:0000256|SAM:Phobius"; TRANSMEM 147..169; /note="Helical"; /evidence="ECO:0000256|SAM:Phobius"; TRANSMEM 181..203; /note="Helical"; /ev…	IPR004638;IPR011701;IPR020846;IPR036259;IPR036511;IPR002616;	PF07690 MFS_1;PF01702 TGT;	cd17502;
A0A1H4YVQ5_TSUTY	tRNA-guanine family transglycosylase	SAMN04489793_4309	Tsukamurella tyrosinosolvens	821	TRANSMEM 12..31; /note="Helical"; /evidence="ECO:0000256|SAM:Phobius"; TRANSMEM 167..186; /note="Helical"; /evidence="ECO:0000256|SAM:Phobius"; TRANSMEM 193..214; /note="Helical"; /evidence="ECO:0000256|SAM:Phobius"; TRANSMEM 230..249; /note="Helical"; /evidence="ECO:0000256|SAM:Phobius"; TRANSMEM 281..303; /note="Helical"; /evidence="ECO:0000256|SAM:Phobius"	IPR004869;IPR036511;IPR002616;	PF03176 MMPL;PF01702 TGT;
A0A3P8LFG8_TSUPA	Queuine tRNA-ribosyltransferase (EC 2.4.2.29)	tgt_2 NCTC10741_02816	Tsukamurella paurometabola (Corynebacterium paurometabolum)	1158	TRANSMEM 187..208; /note="Helical"; /evidence="ECO:0000256|SAM:Phobius"; TRANSMEM 215..234; /note="Helical"; /evidence="ECO:0000256|SAM:Phobius"; TRANSMEM 240..258; /note="Helical"; /evidence="ECO:0000256|SAM:Phobius"; TRANSMEM 279..302; /note="Helical"; /evidence="ECO:0000256|SAM:Phobius"; TRANSMEM 314..337; /note="Helical"; /evidence="ECO:0000256|SAM:Phobius"; TRANSMEM 373..391; /note="Helical"…	IPR004869;IPR000731;IPR036511;IPR002616;	PF03176 MMPL;PF01702 TGT;
A0A5C5RD45_9ACTN	DHA2 family efflux MFS transporter permease subunit	FK529_04245	Tsukamurella asaccharolytica	1025	TRANSMEM 26..51; /note="Helical"; /evidence="ECO:0000256|SAM:Phobius"; TRANSMEM 63..82; /note="Helical"; /evidence="ECO:0000256|SAM:Phobius"; TRANSMEM 94..113; /note="Helical"; /evidence="ECO:0000256|SAM:Phobius"; TRANSMEM 119..140; /note="Helical"; /evidence="ECO:0000256|SAM:Phobius"; TRANSMEM 152..174; /note="Helical"; /evidence="ECO:0000256|SAM:Phobius"; TRANSMEM 186..208; /note="Helical"; /ev…	IPR004638;IPR011701;IPR020846;IPR036259;IPR036511;IPR002616;	PF07690 MFS_1;PF01702 TGT;	cd17502;
A0A5C5RIJ2_9ACTN	DHA2 family efflux MFS transporter permease subunit	FK268_19040	Tsukamurella sputi	1035	TRANSMEM 21..46; /note="Helical"; /evidence="ECO:0000256|SAM:Phobius"; TRANSMEM 58..77; /note="Helical"; /evidence="ECO:0000256|SAM:Phobius"; TRANSMEM 89..108; /note="Helical"; /evidence="ECO:0000256|SAM:Phobius"; TRANSMEM 114..135; /note="Helical"; /evidence="ECO:0000256|SAM:Phobius"; TRANSMEM 147..169; /note="Helical"; /evidence="ECO:0000256|SAM:Phobius"; TRANSMEM 181..203; /note="Helical"; /ev…	IPR004638;IPR011701;IPR020846;IPR036259;IPR036511;IPR002616;	PF07690 MFS_1;PF01702 TGT;	cd17502;
A0A846WXX2_9ACTN	DHA2 family efflux MFS transporter permease subunit	HF999_01815	Tsukamurella spumae	1037	TRANSMEM 21..46; /note="Helical"; /evidence="ECO:0000256|SAM:Phobius"; TRANSMEM 58..77; /note="Helical"; /evidence="ECO:0000256|SAM:Phobius"; TRANSMEM 89..108; /note="Helical"; /evidence="ECO:0000256|SAM:Phobius"; TRANSMEM 114..135; /note="Helical"; /evidence="ECO:0000256|SAM:Phobius"; TRANSMEM 147..169; /note="Helical"; /evidence="ECO:0000256|SAM:Phobius"; TRANSMEM 181..203; /note="Helical"; /ev…	IPR004638;IPR011701;IPR020846;IPR036259;IPR036511;IPR002616;	PF07690 MFS_1;PF01702 TGT;	cd17502;
D5USC3_TSUPD	tRNA-guanine transglycosylase, various specificities (EC 2.4.2.29)	Tpau_0550	Tsukamurella paurometabola (strain ATCC 8368 / DSM 20162 / CCUG 35730 / CIP 100753 / JCM 10117 / KCTC 9821 / NBRC 16120 / NCIMB 702349 / NCTC 13040) (Corynebacterium paurometabolum)	1062	TRANSMEM 27..52; /note="Helical"; /evidence="ECO:0000256|SAM:Phobius"; TRANSMEM 64..83; /note="Helical"; /evidence="ECO:0000256|SAM:Phobius"; TRANSMEM 95..114; /note="Helical"; /evidence="ECO:0000256|SAM:Phobius"; TRANSMEM 120..141; /note="Helical"; /evidence="ECO:0000256|SAM:Phobius"; TRANSMEM 153..175; /note="Helical"; /evidence="ECO:0000256|SAM:Phobius"; TRANSMEM 187..209; /note="Helical"; /ev…	IPR004638;IPR011701;IPR020846;IPR036259;IPR036511;IPR002616;	PF07690 MFS_1;PF01702 TGT;	cd17502;

## Sheet: S2
Table S2. Candidates of transporter from GNNs of TGT, Qng1 and QueK.
			fraction of sequences in organisms of each predicted Q pathway profile
Pfam	Description	Evidence	de novo synthesis	indirect q salvage	direct q salvage	t.b.d.	no Q	Total # of sequences	score (weighting factors: de novo synthesis 1, indirect salvage 5, direct salvage 5, t.b.d. 1, no Q 0)	z-score
PF07690	Major Facilitator Superfamily	Physical clustering with TGT, Qng1, and QueK; fusion with TGT	0.311253	0.0347167	0.269753	0.0434956	0.340782	2506	1.87709	0.813026
PF00005	ABC transporter	Physical clustering with TGT, Qng1, and QueK; fusion with Qng1	0.50464	0.114849	0.106961	0.0607889	0.212761	4310	1.67448	0.644467
PF03176	MMPL family	Physical clustering with TGT; fusion with TGT	0.113497	0.00613497	0.843558	0	0.0368098	326	4.36196	2.88022
PF00892	EamA-like transporter family	Physical clustering with TGT and Qng1	0.192353	0.0270588	0.0570588	0.260588	0.462941	1700	0.873529	-0.0218528
PF02592	Putative vitamin uptake transporter	Physical clustering with TGT and Qng1	0.12219	0.0136852	0.609971	0.0664712	0.187683	1023	3.30694	2.00253
PF02608	ABC transporter substrate-binding protein PnrA-like	Physical clustering with Qng1 and QueK	0.305019	0.274131	0.027027	0.138996	0.254826	259	1.94981	0.873516
PF07168	Ureide permease	Physical clustering with Qng1 and QueK	0.644444	0	0	0.144444	0.211111	90	0.788889	-0.0922664
PF02355-PF07549	Protein export membrane protein-SecD/SecF GG Motif	Physical clustering with TGT	0.854515	0.0151788	0.00939028	0.0316439	0.0892719	7774	1.009	0.0908505
PF02355-PF07549-PF13721-PF21760	Protein export membrane protein-SecD/SecF GG Motif-SecD export protein N-terminal TM region-Protein translocase subunit SecDF, P1 domain, N-terminal	Physical clustering with TGT	0.872988	0.0108282	0.00921861	0.0250219	0.0819432	6834	0.998244	0.0818989
PF03739	Lipopolysaccharide export system permease LptF/LptG	Physical clustering with TGT	0.354778	0.0131898	0.00969044	0.224226	0.398116	3715	0.693405	-0.171701
PF02355-PF07549-PF21760	Protein export membrane protein-SecD/SecF GG Motif-Protein translocase subunit SecDF, P1 domain, N-terminal	Physical clustering with TGT	0.702511	0.0758734	0.00327511	0.0878821	0.130459	1832	1.18614	0.238208
PF02355-PF21760	Protein export membrane protein-Protein translocase subunit SecDF, P1 domain, N-terminal	Physical clustering with TGT	0.745059	0.124506	0.00790514	0.0533597	0.06917	506	1.46047	0.466434
PF02355	Protein export membrane protein	Physical clustering with TGT	0.912226	0.0125392	0.00940439	0.0282132	0.0376176	319	1.05016	0.125086
PF00005-PF00664	ABC transporter-ABC transporter transmembrane region	Physical clustering with TGT	0.0169492	0	0.59887	0.079096	0.305085	177	3.0904	1.82239
PF01544	CorA-like Mg2+ transporter protein	Physical clustering with TGT	0.900709	0.0070922	0	0	0.0921986	141	0.93617	0.0302589
PF03006	Haemolysin-III related	Physical clustering with TGT	0	0	0.85	0	0.15	60	4.25	2.78708
PF03458	Glycine transporter	Physical clustering with TGT	0.966667	0	0	0	0.0333333	60	0.966667	0.0556293
PF13515	Fusaric acid resistance protein-like	Physical clustering with TGT	0	0	0.824561	0.0526316	0.122807	57	4.17544	2.72505
PF06541	Putative ABC-transporter type IV	Physical clustering with TGT	0.470588	0.470588	0	0.0392157	0.0196078	51	2.86275	1.633
PF00005-PF12848	ABC transporter-ABC transporter	Physical clustering with TGT	0.87234	0	0	0	0.12766	47	0.87234	-0.022842
PF00528	Binding-protein-dependent transport system inner membrane component	Physical clustering with QueK	0.603088	0.0833065	0.0704407	0.038276	0.204889	3109	1.4101	0.424527
PF01547	Bacterial extracellular solute-binding protein	Physical clustering with QueK	0.304348	0.143223	0.0332481	0.0741688	0.445013	391	1.26087	0.30038
PF13416	Bacterial extracellular solute-binding protein	Physical clustering with QueK	0.498534	0.152493	0.0117302	0.0762463	0.260997	341	1.39589	0.412709
PF00753	Metallo-beta-lactamase superfamily	Physical clustering with QueK	0.701031	0.00687285	0.0893471	0.0274914	0.175258	291	1.20962	0.257747
PF01773-PF07662-PF07670	Na+ dependent nucleoside transporter N-terminus-Na+ dependent nucleoside transporter C-terminus-Nucleoside recognition	Physical clustering with QueK	0.784615	0.0444444	0.0102564	0.0358974	0.124786	585	1.09402	0.161574
PF00474	Sodium:solute symporter family	Physical clustering with QueK	0.643098	0.00673401	0.0841751	0.003367	0.262626	297	1.10101	0.167391
PF00860	Permease family	Physical clustering with QueK	0.472222	0.174603	0.0238095	0.134921	0.194444	252	1.59921	0.581847
PF12822	ECF transporter, substrate-specific component	Physical clustering with QueK	0.0812325	0.481793	0.0308123	0.221289	0.184874	357	2.86555	1.63533
PF01773-PF07662	Na+ dependent nucleoside transporter N-terminus-Na+ dependent nucleoside transporter C-terminus	Physical clustering with QueK	0.0661479	0.0894942	0.0622568	0.272374	0.509728	257	1.09728	0.164285
PF00083-PF07690	Sugar (and other) transporter-Major Facilitator Superfamily	Physical clustering with QueK	0.485981	0	0.345794	0	0.168224	107	2.21495	1.09409
PF00528-PF12911	Binding-protein-dependent transport system inner membrane component-N-terminal TM domain of oligopeptide transport permease C	Physical clustering with QueK	0.741667	0.075	0.0166667	0.0666667	0.1	120	1.26667	0.305203
PF02705	K+ potassium transporter	Physical clustering with QueK	0.593985	0	0	0.0075188	0.398496	133	0.601504	-0.248154
PF05025	RbsD / FucU transport protein family	Physical clustering with QueK	0.866925	0	0.00904393	0.00645995	0.117571	774	0.918605	0.0156458
PF13343	Bacterial extracellular solute-binding protein	Physical clustering with QueK	0.84127	0.031746	0.0238095	0.015873	0.0873016	126	1.13492	0.195602
PF03788	LrgA family	Physical clustering with QueK	0.718615	0	0.108225	0	0.17316	231	1.25974	0.299441
PF02653	Branched-chain amino acid transport system / permease component	Physical clustering with Qng1	0.685714	0	0.0571429	0.0285714	0.228571	35	1	0.0833597
PF13520	Amino acid permease	Physical clustering with Qng1	0.8	0	0	0	0.2	15	0.8	-0.0830229
PF00496	Bacterial extracellular solute-binding proteins, family 5 Middle	Physical clustering with Qng1	0.428571	0	0	0.142857	0.428571	7	0.571429	-0.273174
PF00528-PF19300	Binding-protein-dependent transport system inner membrane component-Binding-prot-dependent transport system membrane comp, N-term	Physical clustering with Qng1	0.333333	0	0	0.166667	0.5	6	0.5	-0.332597
PF01925	Sulfite exporter TauE/SafE	Physical clustering with Qng1	1	0	0	0	0	3	1	0.0833597
PF00497	Bacterial extracellular solute-binding proteins, family 3	Physical clustering with Qng1	0.875	0	0	0	0.125	8	0.875	-0.0206294
PF03169	OPT oligopeptide transporter protein	Physical clustering with Qng1	0.6	0.4	0	0	0	5	2.6	1.41442
PF03773	Predicted permease	Physical clustering with Qng1	1	0	0	0	0	5	1	0.0833597
PF13458	Periplasmic binding protein	Physical clustering with Qng1	0.6	0	0	0	0.4	5	0.6	-0.249405
PF02096	60Kd inner membrane protein	Physical clustering with Qng1	0	0	1	0	0	4	5	3.41101
PF11271	Porin PorA	Physical clustering with Qng1	0	0	0	0	1	4	0	-0.748553
PF03544	Gram-negative bacterial TonB protein C-terminal	Physical clustering with Qng1	0.333333	0	0	0.333333	0.333333	3	0.666667	-0.193945
PF05977	Transmembrane secretion effector	Physical clustering with Qng1	0.777778	0	0	0	0.222222	9	0.777778	-0.10151
PF00873	AcrB/AcrD/AcrF family	Physical clustering with Qng1	1	0	0	0	0	2	1	0.0833597
PF13525	Outer membrane lipoprotein	Physical clustering with Qng1	0	0	1	0	0	2	5	3.41101
PF13533-PF16576	Biotin-lipoyl like-Barrel-sandwich domain of CusB or HlyD membrane-fusion	Physical clustering with Qng1	1	0	0	0	0	2	1	0.0833597

## Sheet: S3
Table S3. Genomic graphic information.
Genome	ID	Start	Stop	Size (nt)	Strand	Function	FC	SS	Set
actinobacterium acAcidi	A0A094PS44	9464	9606	141	-	RuvX; InterPro=IPR037027; IPR005227; IPR006641; IPR012337
actinobacterium acAcidi	A0A094PLB8	9608	10485	876	-	tRNA-synt_2c; DHHA1; tRNA_SAD; InterPro=IPR045864; IPR023033; IPR018164; IPR003156; IPR012947; IPR002318; IPR018165; IPR018162; IPR009000; IPR018163
actinobacterium acAcidi	A0A094QDX0	10490	10590	99	-	none
actinobacterium acAcidi	A0A094PN17	10595	10987	391	-	AAA; MgsA_C; AAA_assoc_2; InterPro=IPR027417; IPR003959; IPR021886; IPR032423; IPR003593; IPR008921
actinobacterium acAcidi	A0A094S3Z2	10988	11576	586	-	tRNA-synt_2; tRNA_anti-codon; GAD; InterPro=IPR012340; IPR004115; IPR045864; IPR004524; IPR004364; IPR004365; IPR029351; IPR002312; IPR006195; IPR047089
actinobacterium acAcidi	A0A094PS46	11575	11978	401	-	HGTP_anticodon; tRNA-synt_His; InterPro=IPR045864; IPR036621; IPR015807; IPR004154; IPR041715; IPR004516; IPR006195; IPR033656
actinobacterium acAcidi	A0A094PLC2	12005	12744	738	-	TGS; RelA_SpoT; ACT_4; HD_4; RelA_AH_RIS; InterPro=IPR012675; IPR043519; IPR004095; IPR007685; IPR002912; IPR045600; IPR006674; IPR003607; IPR045865; IPR012676; IPR004811; IPR033655
actinobacterium acAcidi	A0A094QDX3	12748	13120	371	-	SecD_SecF; Sec_GG; InterPro=IPR005665; IPR048634; IPR022645; IPR022813
actinobacterium acAcidi	A0A094PN21	13120	13626	504	-	SecD_SecF; SecD_1st; InterPro=IPR005791; IPR048634; IPR048631; IPR022813; IPR022645
actinobacterium acAcidi	A0A094S3Z4	13627	13743	114	-	YajC; InterPro=IPR003849
actinobacterium acAcidi	A0A094PS51	13758	14124	364	-	TGT; InterPro=IPR036511; IPR004803; IPR002616
actinobacterium acAcidi	A0A094PLC4	14128	14462	332	-	Queuosine_synth; InterPro=IPR042119; IPR042118; IPR003699; IPR036100
actinobacterium acAcidi	A0A094QDX5	14465	14796	329	-	RuvB_C; RuvB_N; AAA_lid_4; InterPro=IPR036388; IPR027417; IPR004605; IPR008823; IPR008824; IPR041445; IPR003593; IPR036390
actinobacterium acAcidi	A0A094PN23	14792	14990	196	-	RuvA_N; RuvA_C; HHH_5; InterPro=IPR012340; IPR000085; IPR013849; IPR011114; IPR003583; IPR010994
actinobacterium acAcidi	A0A094S3Z7	14989	15171	180	-	RuvC; InterPro=IPR036397; IPR002176; IPR012337
actinobacterium acAcidi	A0A094PS55	15185	15335	149	-	AhpC; TSA; InterPro=IPR000866; IPR024706; IPR013766; IPR036249
actinobacterium acAcidi	A0A094PLC8	15335	15584	247	-	Transcrip_reg; TACO1_YebC_N; InterPro=IPR017856; IPR026564; IPR002876; IPR048300; IPR049083; IPR029072
actinobacterium acAcidi	A0A094QDX8	15585	15780	193	-	SNO; InterPro=IPR029062; IPR002161
actinobacterium acAcidi	A0A094PN28	15789	16090	299	-	SOR_SNZ; InterPro=IPR013785; IPR001852; IPR033755; IPR011060
actinobacterium acAcidi	A0A094S400	16107	16466	357	-	DUF3048; DUF3048_C; InterPro=IPR023158; IPR021416; IPR035328
actinobacterium acAcidi	A0A094PS58	16466	16739	271	-	none
Actinomycetota bacterium	A0A9E2X591	0	215	213	+	Response_reg; Trans_reg_C; InterPro=IPR036388; IPR001789; IPR001867; IPR039420; IPR016032; IPR011006
Actinomycetota bacterium	A0A9E2X530	221	678	456	+	HisKA; HAMP; HATPase_c; InterPro=IPR036890; IPR003661; IPR003660; IPR003594; IPR004358; IPR005467; IPR036097
Actinomycetota bacterium	A0A9E2X2K1	680	828	147	-	none
Actinomycetota bacterium	A0A9E2X0P5	838	1147	308	+	Queuosine_synth; InterPro=IPR042119; IPR042118; IPR003699; IPR036100
Actinomycetota bacterium	A0A9E2U2B5	1146	1230	82	+	none
Actinomycetota bacterium	A0A9E2U108	1229	1605	374	+	TGT; InterPro=IPR036511; IPR004803; IPR002616
Actinomycetota bacterium	A0A9E2TXG9	1604	1708	103	+	YajC; InterPro=IPR003849
Actinomycetota bacterium	A0A9E2TXD9	1715	2660	944	+	SecD_SecF; MMPL; Sec_GG; SecD_1st; InterPro=IPR005791; IPR005665; IPR048634; IPR004869; IPR048631; IPR022645; IPR022813
Actinomycetota bacterium	A0A9E2TZB8	2703	2874	169	-	none
Actinomycetota bacterium	A0A9E2U4E4	2880	3409	528	+	LPG_synthase_C; InterPro=IPR024320; IPR016181
Actinomycetota bacterium	A0A9E2TZ08	3411	3971	558	+	ABC1; InterPro=IPR004147; IPR011009
Actinomycetota bacterium	A0A9E2U3M0	3971	4228	256	+	PEP_mutase; InterPro=IPR040442; IPR015813; IPR039556
Actinomycetota bacterium	A0A9E2U6J7	4243	4361	116	-	none
Actinomycetota bacterium	A0A9E2U4F5	4397	4612	213	+	Trans_reg_C; InterPro=IPR036388; IPR001867; IPR001789; IPR039420; IPR016032; IPR011006
Actinomycetota bacterium	A0A9E2WVU3	4613	4681	67	+	none
Actinomycetota bacterium	A0A9E2X596	4710	4899	187	-	DNA_binding_1; InterPro=IPR036388; IPR023546; IPR014048; IPR036217; IPR036631
Bifidobacterium dentium (strain ATCC 27534 / DSM 20436 / JCM 1195 / Bd1)	D2Q6Z2	16669	16845	174	-	FHA; InterPro=IPR000253; IPR008984
Bifidobacterium dentium (strain ATCC 27534 / DSM 20436 / JCM 1195 / Bd1)	D2Q6Z3	16854	17087	232	-	FHA; FhaA_N; InterPro=IPR042287; IPR000253; IPR022128; IPR008984
Bifidobacterium dentium (strain ATCC 27534 / DSM 20436 / JCM 1195 / Bd1)	D2Q6Z4	17187	18015	827	+	Peptidase_S9; DPPIV_N; InterPro=IPR029058; IPR001375; IPR002469
Bifidobacterium dentium (strain ATCC 27534 / DSM 20436 / JCM 1195 / Bd1)	D2Q6Z5	18082	18908	824	+	ABC2_membrane_3; InterPro=IPR013525; IPR017500; IPR017501
Bifidobacterium dentium (strain ATCC 27534 / DSM 20436 / JCM 1195 / Bd1)	D2Q6Z6	18907	19665	756	+	ABC2_membrane; ABC2_membrane_3; InterPro=IPR013525; IPR017500; IPR017501
Bifidobacterium dentium (strain ATCC 27534 / DSM 20436 / JCM 1195 / Bd1)	D2Q6Z7	19693	20047	353	+	Hydrolase_4; InterPro=IPR029058; IPR022742
Bifidobacterium dentium (strain ATCC 27534 / DSM 20436 / JCM 1195 / Bd1)	D2Q6Z8	20097	20500	401	-	Aminotran_1_2; InterPro=IPR015421; IPR015422; IPR004839; IPR015424
Bifidobacterium dentium (strain ATCC 27534 / DSM 20436 / JCM 1195 / Bd1)	D2Q6Z9	20546	20847	299	+	EamA; InterPro=IPR000620
Bifidobacterium dentium (strain ATCC 27534 / DSM 20436 / JCM 1195 / Bd1)	D2Q700	20966	21176	208	-	NAD_binding_10; InterPro=IPR016040; IPR036291
Bifidobacterium dentium (strain ATCC 27534 / DSM 20436 / JCM 1195 / Bd1)	D2Q701	21255	21363	106	+	HxlR; InterPro=IPR036388; IPR002577; IPR036390; IPR011991
Bifidobacterium dentium (strain ATCC 27534 / DSM 20436 / JCM 1195 / Bd1)	D2Q702	21585	22023	437	-	TGT; InterPro=IPR036511; IPR004803; IPR002616
Bifidobacterium dentium (strain ATCC 27534 / DSM 20436 / JCM 1195 / Bd1)	D2Q703	22123	22736	611	+	PDZ_2; Trypsin_2; InterPro=IPR036034; IPR001478; IPR001940; IPR009003
Bifidobacterium dentium (strain ATCC 27534 / DSM 20436 / JCM 1195 / Bd1)	D2Q704	22852	23663	810	+	E1-E2_ATPase; Hydrolase; InterPro=IPR023299; IPR023214; IPR044492; IPR036412; IPR008250; IPR023298; IPR001757
Bifidobacterium dentium (strain ATCC 27534 / DSM 20436 / JCM 1195 / Bd1)	D2Q705	23762	24098	335	-	Asparaginase; Asparaginase_C; InterPro=IPR037152; IPR027473; IPR027474; IPR040919; IPR006034; IPR036152; IPR041725
Bifidobacterium dentium (strain ATCC 27534 / DSM 20436 / JCM 1195 / Bd1)	D2Q706	24129	24622	491	-	AA_permease; InterPro=IPR004841
Bifidobacterium dentium (strain ATCC 27534 / DSM 20436 / JCM 1195 / Bd1)	D2Q707	24717	25290	572	+	none
Bifidobacterium dentium (strain ATCC 27534 / DSM 20436 / JCM 1195 / Bd1)	D2Q708	25330	25815	483	+	Pyr_redox_2; InterPro=IPR036188; IPR023753; IPR021163
Bifidobacterium dentium (strain ATCC 27534 / DSM 20436 / JCM 1195 / Bd1)	D2Q709	25876	26225	348	+	Beta; lactamase2; InterPro=IPR012338; IPR045155; IPR000871
Bifidobacterium dentium (strain ATCC 27534 / DSM 20436 / JCM 1195 / Bd1)	D2Q710	26254	26604	349	+	Peptidase_M48; InterPro=IPR022919; IPR001915
Bifidobacterium dentium (strain ATCC 27534 / DSM 20436 / JCM 1195 / Bd1)	D2Q711	26745	27113	366	-	Phage_integrase; Phage_int_SAM_3; InterPro=IPR010998; IPR013762; IPR002104; IPR004107; IPR011010
Bifidobacterium dentium (strain ATCC 27534 / DSM 20436 / JCM 1195 / Bd1)	D2Q712	27127	27358	229	-	none
Glutamicibacter arilaitensis (strain DSM 16368 / CIP 108037 / IAM 15318 /JCM 13566 / NCIMB 14258 / Re117)	E1VSI5	127048	128142	1092	-	Peptidase_S8; InterPro=IPR036852; IPR000209; IPR015500; IPR034213
Glutamicibacter arilaitensis (strain DSM 16368 / CIP 108037 / IAM 15318 /JCM 13566 / NCIMB 14258 / Re117)	E1VSI6	128260	128423	161	-	FBP_C; InterPro=IPR032330
Glutamicibacter arilaitensis (strain DSM 16368 / CIP 108037 / IAM 15318 /JCM 13566 / NCIMB 14258 / Re117)	E1VSI7	128560	128986	424	+	DDE_Tnp_ISL3; zf-ISL3; InterPro=IPR047951; IPR002560; IPR029261
Glutamicibacter arilaitensis (strain DSM 16368 / CIP 108037 / IAM 15318 /JCM 13566 / NCIMB 14258 / Re117)	E1VSI8	129018	129292	272	-	Phos_pyr_kin; InterPro=IPR029056; IPR013749; IPR004399
Glutamicibacter arilaitensis (strain DSM 16368 / CIP 108037 / IAM 15318 /JCM 13566 / NCIMB 14258 / Re117)	E1VSI9	129306	129511	203	-	none
Glutamicibacter arilaitensis (strain DSM 16368 / CIP 108037 / IAM 15318 /JCM 13566 / NCIMB 14258 / Re117)	E1VSJ0	129555	129791	234	-	TetR_N; InterPro=IPR001647; IPR009057; IPR036271
Glutamicibacter arilaitensis (strain DSM 16368 / CIP 108037 / IAM 15318 /JCM 13566 / NCIMB 14258 / Re117)	E1VSJ1	129911	130147	235	+	Vut_1; InterPro=IPR003744
Glutamicibacter arilaitensis (strain DSM 16368 / CIP 108037 / IAM 15318 /JCM 13566 / NCIMB 14258 / Re117)	E1VSJ2	130170	130401	230	+	ABC_tran; InterPro=IPR027417; IPR003439; IPR003593
Glutamicibacter arilaitensis (strain DSM 16368 / CIP 108037 / IAM 15318 /JCM 13566 / NCIMB 14258 / Re117)	E1VSJ3	130404	130926	520	+	DUF6297; InterPro=IPR046264
Glutamicibacter arilaitensis (strain DSM 16368 / CIP 108037 / IAM 15318 /JCM 13566 / NCIMB 14258 / Re117)	E1VSJ4	130935	131087	150	+	Acetyltransf_10; InterPro=IPR000182; IPR016181
Glutamicibacter arilaitensis (strain DSM 16368 / CIP 108037 / IAM 15318 /JCM 13566 / NCIMB 14258 / Re117)	E1VSJ5	131111	131544	431	-	TGT; InterPro=IPR036511; IPR004803; IPR002616
Glutamicibacter arilaitensis (strain DSM 16368 / CIP 108037 / IAM 15318 /JCM 13566 / NCIMB 14258 / Re117)	E1VSJ6	131588	131954	364	+	FUSC_2; InterPro=IPR049453
Glutamicibacter arilaitensis (strain DSM 16368 / CIP 108037 / IAM 15318 /JCM 13566 / NCIMB 14258 / Re117)	E1VSJ7	131953	132133	178	-	DUF4916; InterPro=IPR032582; IPR015797
Glutamicibacter arilaitensis (strain DSM 16368 / CIP 108037 / IAM 15318 /JCM 13566 / NCIMB 14258 / Re117)	E1VSJ8	132202	132685	481	+	MFS_1; InterPro=IPR036259; IPR011701; IPR020846; IPR004638
Glutamicibacter arilaitensis (strain DSM 16368 / CIP 108037 / IAM 15318 /JCM 13566 / NCIMB 14258 / Re117)	E1VSJ9	132735	132993	257	+	adh_short; InterPro=IPR002347; IPR036291
Glutamicibacter arilaitensis (strain DSM 16368 / CIP 108037 / IAM 15318 /JCM 13566 / NCIMB 14258 / Re117)	E1VSK0	133002	133140	137	-	none
Glutamicibacter arilaitensis (strain DSM 16368 / CIP 108037 / IAM 15318 /JCM 13566 / NCIMB 14258 / Re117)	E1VSK1	133154	133701	546	+	Resolvase; Recombinase; Zn_ribbon_recom; InterPro=IPR036162; IPR038109; IPR006119; IPR011109; IPR025827
Glutamicibacter arilaitensis (strain DSM 16368 / CIP 108037 / IAM 15318 /JCM 13566 / NCIMB 14258 / Re117)	E1VSK2	133760	133950	188	-	none
Glutamicibacter arilaitensis (strain DSM 16368 / CIP 108037 / IAM 15318 /JCM 13566 / NCIMB 14258 / Re117)	E1VSK3	133953	134107	152	-	SSB; InterPro=IPR012340; IPR000424; IPR011344
Glutamicibacter arilaitensis (strain DSM 16368 / CIP 108037 / IAM 15318 /JCM 13566 / NCIMB 14258 / Re117)	E1VSK4	134136	134724	587	-	TraG; D_C; InterPro=IPR027417; IPR032689
Glutamicibacter arilaitensis (strain DSM 16368 / CIP 108037 / IAM 15318 /JCM 13566 / NCIMB 14258 / Re117)	E1VSK5	134723	134903	178	-	none
Borrelia bissettiae (strain DSM 17990 / CIP 109136 / DN127)	G0AMN6	280040	280186	144	+	RimP_N; InterPro=IPR003728; IPR028989; IPR035956
Borrelia bissettiae (strain DSM 17990 / CIP 109136 / DN127)	G0AMN7	280191	280673	481	+	S1; NusA_N; KH_5; InterPro=IPR012340; IPR036555; IPR015946; IPR030842; IPR003029; IPR013735; IPR025249; IPR004087; IPR009019; IPR010213
Borrelia bissettiae (strain DSM 17990 / CIP 109136 / DN127)	G0AMN8	280674	281546	870	+	GTP_EFTU; IF2_N; IF-2; InterPro=IPR036925; IPR027417; IPR000178; IPR000795; IPR006847; IPR023115; IPR015760; IPR009000; IPR005225; IPR044145
Borrelia bissettiae (strain DSM 17990 / CIP 109136 / DN127)	G0AMN9	281554	281675	119	+	RBFA; InterPro=IPR015946; IPR000238; IPR023799
Borrelia bissettiae (strain DSM 17990 / CIP 109136 / DN127)	G0AMP0	281676	281958	281	+	TruB_N; InterPro=IPR014780; IPR002501; IPR020103
Borrelia bissettiae (strain DSM 17990 / CIP 109136 / DN127)	G0AMP1	282015	282104	87	+	Ribosomal_S15; InterPro=IPR005290; IPR000589; IPR009068
Borrelia bissettiae (strain DSM 17990 / CIP 109136 / DN127)	G0AMP2	282115	282832	715	+	KH_1; S1; RNase_PH; RNase_PH_C; PNPase; InterPro=IPR012340; IPR036612; IPR027408; IPR012162; IPR004088; IPR003029; IPR001247; IPR015847; IPR015848; IPR004087; IPR020568; IPR036345
Borrelia bissettiae (strain DSM 17990 / CIP 109136 / DN127)	G0AMP3	282834	283338	502	+	none; InterPro=IPR015943; IPR011047
Borrelia bissettiae (strain DSM 17990 / CIP 109136 / DN127)	G0AMP4	283368	283759	389	+	LptF_LptG; InterPro=IPR005495
Borrelia bissettiae (strain DSM 17990 / CIP 109136 / DN127)	G0AMP5	283758	284114	354	+	LptF_LptG; InterPro=IPR005495
Borrelia bissettiae (strain DSM 17990 / CIP 109136 / DN127)	G0AMP6	284124	284499	374	+	TGT; InterPro=IPR036511; IPR004803; IPR002616
Borrelia bissettiae (strain DSM 17990 / CIP 109136 / DN127)	G0AMP7	284497	285004	505	+	MurJ; InterPro=IPR004268
Borrelia bissettiae (strain DSM 17990 / CIP 109136 / DN127)	G0AMP8	285003	285472	468	+	HEAT_2; InterPro=IPR011989; IPR016024
Borrelia bissettiae (strain DSM 17990 / CIP 109136 / DN127)	G0AMP9	285480	285833	352	-	Flavoprotein; DFP; InterPro=IPR035929; IPR036551; IPR005252; IPR003382; IPR007085
Borrelia bissettiae (strain DSM 17990 / CIP 109136 / DN127)	G0AMQ0	285908	285951	42	-	none
Borrelia bissettiae (strain DSM 17990 / CIP 109136 / DN127)	G0AMQ1	285970	286414	443	+	SSF; InterPro=IPR038377; IPR001734; IPR011849
Borrelia bissettiae (strain DSM 17990 / CIP 109136 / DN127)	G0AMQ2	286493	286733	238	+	PseudoU_synth_2; InterPro=IPR006145; IPR020103
Borrelia bissettiae (strain DSM 17990 / CIP 109136 / DN127)	G0AMQ3	286723	287038	314	+	none; InterPro=IPR027417
Borrelia bissettiae (strain DSM 17990 / CIP 109136 / DN127)	G0AMQ4	287035	287504	467	+	Mur_ligase; Mur_ligase_C; Mur_ligase_M; InterPro=IPR036565; IPR036615; IPR005758; IPR000713; IPR004101; IPR013221
Borrelia bissettiae (strain DSM 17990 / CIP 109136 / DN127)	G0AMQ5	287507	287796	287	+	YicC_N; DUF1732; InterPro=IPR013527; IPR013551; IPR005229
Borrelia bissettiae (strain DSM 17990 / CIP 109136 / DN127)	G0AMQ6	287795	287976	179	+	Cytidylate_kin2; InterPro=IPR027417; IPR011892; IPR011994
Anaplasma phagocytophilum (strain HZ)	Q2GL35	95866	95999	131	+	Ribosomal_L17; InterPro=IPR036373; IPR000456
Anaplasma phagocytophilum (strain HZ)	Q2GL34	96003	96796	791	+	tRNA_bind; FDX-ACB; B3_4; B5; tRNA_synthFbeta; InterPro=IPR012340; IPR036690; IPR045864; IPR020825; IPR004532; IPR002547; IPR005121; IPR005146; IPR005147; IPR041616; IPR045060; IPR009061; IPR033714
Anaplasma phagocytophilum (strain HZ)	Q2GL33	97095	97800	704	+	Competence; DUF4131; InterPro=IPR004477; IPR025405
Anaplasma phagocytophilum (strain HZ)	Q2GL32	97978	98422	442	-	Na_Ala_symp; InterPro=IPR001463
Anaplasma phagocytophilum (strain HZ)	Q2GL31	98432	98553	119	-	Ribonuclease_P; InterPro=IPR014721; IPR000100; IPR020568
Anaplasma phagocytophilum (strain HZ)	Q2GL30	98550	98595	43	-	Ribosomal_L34; InterPro=IPR000271
Anaplasma phagocytophilum (strain HZ)	Q2GL29	98844	99137	291	+	UbiA; InterPro=IPR044878; IPR006370; IPR000537; IPR039653
Anaplasma phagocytophilum (strain HZ)	Q2GL28	99144	99309	163	+	Flavin_Reduct; InterPro=IPR012349; IPR002563
Anaplasma phagocytophilum (strain HZ)	Q2GL27	99524	99580	55	+	none
Anaplasma phagocytophilum (strain HZ)	Q2GL26	99582	99835	251	+	ABC_tran; InterPro=IPR027417; IPR003439; IPR005670; IPR003593
Anaplasma phagocytophilum (strain HZ)	Q2GL25	99861	100255	393	-	TGT; InterPro=IPR036511; IPR004803; IPR002616
Anaplasma phagocytophilum (strain HZ)	Q2GL24	100413	100471	57	+	Ribosomal_L32p; InterPro=IPR002677; IPR044957; IPR011332
Anaplasma phagocytophilum (strain HZ)	Q2GL23	100474	100819	344	+	FA_synthesis; InterPro=IPR012281; IPR003664
Anaplasma phagocytophilum (strain HZ)	Q2GL22	100819	101139	318	+	ACP_syn_III_C; ACP_syn_III; InterPro=IPR016039; IPR004655; IPR013747; IPR013751
Anaplasma phagocytophilum (strain HZ)	F5GUS0	101184	101292	106	+	Surface_Ag_2; InterPro=IPR002566
Anaplasma phagocytophilum (strain HZ)	F5GUS1	101292	101502	208	+	none
Anaplasma phagocytophilum (strain HZ)	Q2GL21	101497	101531	32	+	none
Anaplasma phagocytophilum (strain HZ)	Q2GL20	101652	101800	146	-	MafB19; deam; InterPro=IPR028883; IPR002125; IPR016193
Anaplasma phagocytophilum (strain HZ)	Q2GL19	101859	102003	142	+	none
Anaplasma phagocytophilum (strain HZ)	Q2GL18	102019	102505	484	+	DnaB; DnaB_C; InterPro=IPR016136; IPR027417; IPR007693; IPR007694; IPR036185; IPR007692
Anaplasma phagocytophilum (strain HZ)	Q2GL17	102926	102979	51	-	none
Firmicutes bacterium CAG:102	R5AG15	143	272	127	+	Response_reg; InterPro=IPR001789; IPR011006
Firmicutes bacterium CAG:102	R5AAZ9	310	457	146	-	none
Firmicutes bacterium CAG:102	R5ADC3	514	661	145	-	YajC; InterPro=IPR003849
Firmicutes bacterium CAG:102	R5A9H3	695	1072	376	-	TGT; InterPro=IPR036511; IPR004803; IPR002616
Firmicutes bacterium CAG:102	R5AKM8	1142	1526	382	+	UPF0020; THUMP; InterPro=IPR029063; IPR000241; IPR004114
Firmicutes bacterium CAG:102	R5AG23	1557	2075	516	-	Peptidase_S11; PBP5_C; InterPro=IPR037167; IPR012338; IPR001967; IPR012907; IPR018044; IPR015956
Firmicutes bacterium CAG:102	R5AB04	2074	2383	308	-	ABC_trans_CmpB; InterPro=IPR010540
Firmicutes bacterium CAG:102	R5ADC7	2388	2707	317	-	IPPT; InterPro=IPR027417; IPR018022; IPR039657
Firmicutes bacterium CAG:102	R5A9H8	2711	3380	667	-	DNA_mis_repair; MutL_C; HATPase_c_3; InterPro=IPR042121; IPR042120; IPR014721; IPR036890; IPR020667; IPR013507; IPR014790; IPR038973; IPR037198; IPR020568; IPR002099
Firmicutes bacterium CAG:102	R5AKN2	3387	4261	872	-	MutS_V; MutS_I; MutS_II; MutS_IV; MutS_III; InterPro=IPR036678; IPR016151; IPR027417; IPR005748; IPR000432; IPR007695; IPR007860; IPR007861; IPR007696; IPR017261; IPR045076; IPR036187
Firmicutes bacterium CAG:102	R5AG30	4292	4426	133	-	Com_YlbF; InterPro=IPR023378; IPR010368
Firmicutes bacterium CAG:102	R5AB11	4430	4909	477	-	UPF0004; TRAM; Radical_SAM; InterPro=IPR038135; IPR023404; IPR006463; IPR013848; IPR002792; IPR007197; IPR006638; IPR005839
Firmicutes bacterium CAG:102	R5ADD3	4949	5112	162	-	tRNA_edit; InterPro=IPR036754; IPR007214; IPR040285
Firmicutes bacterium CAG:102	R5A9I3	5244	5662	416	+	MOFRL; DUF4147; InterPro=IPR037035; IPR038614; IPR007835; IPR025286; IPR039760
Trueperaceae bacterium	A0A2E2ULX3	50384	50579	193	+	Nitroreductase; InterPro=IPR000415; IPR029479
Trueperaceae bacterium	A0A2E2ULV0	50578	50706	127	-	Ribonuc_L; PSP; InterPro=IPR035959; IPR006175; IPR006056
Trueperaceae bacterium	A0A2E2ULQ5	50723	51050	325	-	PP2C_2; InterPro=IPR036457; IPR001932; IPR015655
Trueperaceae bacterium	A0A2E2UM27	51085	51572	485	+	Amidase; InterPro=IPR036928; IPR004412; IPR023631; IPR000120
Trueperaceae bacterium	A0A2E2ULQ3	51641	51689	46	+	Ribosomal_L34; InterPro=IPR000271
Trueperaceae bacterium	A0A2E2UN33	51685	51810	124	+	Ribonuclease_P; InterPro=IPR014721; IPR000100; IPR020568
Trueperaceae bacterium	A0A2E2ULR2	51809	51891	80	+	YidD; InterPro=IPR002696
Trueperaceae bacterium	A0A2E2ULR7	51890	52425	533	+	60KD_IMP; InterPro=IPR019998; IPR028055; IPR001708; IPR047196
Trueperaceae bacterium	A0A2E2ULW1	52430	52635	204	+	R3H; KhpA-B_KH; InterPro=IPR036867; IPR015946; IPR001374; IPR039247; IPR038008; IPR034079
Trueperaceae bacterium	A0A2E2UML2	52650	52887	235	+	Hydrolase; InterPro=IPR023198; IPR023214; IPR006439; IPR036412; IPR006328
Trueperaceae bacterium	A0A2E2ULY4	52890	53207	316	+	Q_salvage; InterPro=IPR019438
Trueperaceae bacterium	A0A2E2ULW0	53208	53437	228	-	EamA; InterPro=IPR000620
Trueperaceae bacterium	A0A2E2ULR4	53615	54014	397	+	CoA_transf_3; InterPro=IPR044855; IPR023606; IPR003673
Trueperaceae bacterium	A0A2E2UM36	54052	54276	223	-	Lactamase_B_3; InterPro=IPR036866
Trueperaceae bacterium	A0A2E2ULR0	54310	54835	523	-	MS_TIM-barrel; MS_N; MS_C; InterPro=IPR044856; IPR046363; IPR001465; IPR048356; IPR048355; IPR006252; IPR011076
Trueperaceae bacterium	A0A2E2UN47	54901	55088	185	-	NTP_transf_3; InterPro=IPR029044; IPR013482; IPR025877
Trueperaceae bacterium	A0A2E2ULS1	55108	55344	235	+	SNARE_assoc; InterPro=IPR032816; IPR015414
Trueperaceae bacterium	A0A2E2ULS4	55531	56164	631	+	HSP70; InterPro=IPR029047; IPR012725; IPR013126; IPR043129
Trueperaceae bacterium	A0A2E2ULX1	56183	56381	196	+	GrpE; InterPro=IPR009012; IPR013805; IPR000740
Trueperaceae bacterium	A0A2E2UMM1	56694	57037	341	+	Rotamase_3; InterPro=IPR046357; IPR000297; IPR027304
Acidobacteriota bacterium	A0A2V9U8W5	0	135	134	-	IU_nuc_hydro; InterPro=IPR036452; IPR001910; IPR023186
Acidobacteriota bacterium	A0A2V9U815	175	346	169	-	none
Acidobacteriota bacterium	A0A2V9U0E2	345	1363	1016	-	CarboxypepD_reg; InterPro=IPR008969
Acidobacteriota bacterium	A0A2V9UH52	1493	1805	310	-	PfkB; InterPro=IPR029056; IPR011877; IPR011611; IPR002139
Acidobacteriota bacterium	A0A2V9U660	1878	2107	227	-	PRAI; InterPro=IPR013785; IPR001240; IPR044643; IPR011060
Acidobacteriota bacterium	A0A2V9U0E4	2110	2905	793	-	Aldedh; InterPro=IPR016163; IPR016162; IPR015590; IPR011408; IPR016161
Acidobacteriota bacterium	A0A2V9U3U5	2934	3287	351	-	DeoC; InterPro=IPR013785; IPR002915; IPR011343
Acidobacteriota bacterium	A0A2V9UA40	3444	3804	358	+	IU_nuc_hydro; InterPro=IPR036452; IPR001910; IPR023186
Acidobacteriota bacterium	A0A2V9U0M9	3827	4146	318	+	Ureide_permease; InterPro=IPR009834; IPR010651
Acidobacteriota bacterium	A0A2V9U3C8	4238	4608	369	+	Q_salvage; InterPro=IPR019438
Acidobacteriota bacterium	A0A2V9U8X4	4681	4926	243	+	Ysc84; InterPro=IPR007461
Acidobacteriota bacterium	A0A2V9U829	4966	5310	343	+	Glycos_transf_1; Glyco_transf_4; InterPro=IPR001296; IPR028098
Acidobacteriota bacterium	A0A2V9U0F2	5352	5418	64	+	none
Acidobacteriota bacterium	A0A2V9UH62	5472	6235	762	+	TonB_dep_Rec; Plug; CarboxypepD_reg; InterPro=IPR037066; IPR036942; IPR000531; IPR012910; IPR039426; IPR008969
Candidatus Aquidulcis sp	A0A3L7YTR0	0	367	366	-	p450; InterPro=IPR036396; IPR001128; IPR002397
Candidatus Aquidulcis sp	A0A3L7YW34	369	631	260	-	PNP_UDP_1; InterPro=IPR035994; IPR000845
Candidatus Aquidulcis sp	A0A3L7YTX9	633	931	296	-	CbiQ; InterPro=IPR003339
Candidatus Aquidulcis sp	A0A3L7YUG9	931	1213	281	-	ABC_tran; InterPro=IPR027417; IPR003439; IPR003593; IPR015856
Candidatus Aquidulcis sp	A0A3L7YVD8	1206	1488	280	-	ABC_tran; InterPro=IPR027417; IPR003439; IPR003593; IPR015856
Candidatus Aquidulcis sp	A0A3L7Y0M4	1528	1601	71	-	none
Candidatus Aquidulcis sp	A0A3L7YSS3	1605	1835	229	-	none
Candidatus Aquidulcis sp	A0A3L7YST9	1955	2253	297	+	Q_salvage; InterPro=IPR019438
Candidatus Aquidulcis sp	A0A3L7YUE8	2271	2664	391	+	MFS_1; InterPro=IPR036259; IPR011701; IPR020846
Candidatus Aquidulcis sp	A0A3L7YT52	2650	2987	335	-	IU_nuc_hydro; InterPro=IPR036452; IPR001910; IPR023186
Candidatus Aquidulcis sp	A0A3L7YTR8	2991	3067	75	-	none; InterPro=IPR035994
Corynebacterium diphtheriae (strain ATCC 27012 / C7 (beta)	A0A806GE06	601710	601753	41	-	none
Corynebacterium diphtheriae (strain ATCC 27012 / C7 (beta)	A0A806GS28	601758	602162	403	-	Abhydrolase_1; InterPro=IPR029058; IPR000073; IPR002410
Corynebacterium diphtheriae (strain ATCC 27012 / C7 (beta)	A0A806GI88	602163	602384	220	+	Ala_racemase_N; InterPro=IPR029066; IPR011078; IPR001608
Corynebacterium diphtheriae (strain ATCC 27012 / C7 (beta)	A0A806GZ80	602383	602846	461	+	FGGY_N; FGGY_C; InterPro=IPR018484; IPR018485; IPR000577; IPR043129
Corynebacterium diphtheriae (strain ATCC 27012 / C7 (beta)	A0A806GUD0	602862	602933	69	+	none
Corynebacterium diphtheriae (strain ATCC 27012 / C7 (beta)	A0A806GXI4	603034	603572	536	+	Rhodanese; Pyr_redox_dim; Pyr_redox_2; InterPro=IPR036873; IPR036188; IPR001763; IPR004099; IPR023753; IPR016156
Corynebacterium diphtheriae (strain ATCC 27012 / C7 (beta)	A0A806GFM2	603565	603662	95	+	Trns_repr_metal; InterPro=IPR038390; IPR003735
Corynebacterium diphtheriae (strain ATCC 27012 / C7 (beta)	A0A806GM79	603657	604176	517	-	Na_H_Exchanger; TrkA_N; InterPro=IPR038770; IPR006153; IPR003148; IPR036291
Corynebacterium diphtheriae (strain ATCC 27012 / C7 (beta)	A0A806GS33	604181	604253	71	+	PLDc_N; InterPro=IPR027379
Corynebacterium diphtheriae (strain ATCC 27012 / C7 (beta)	A0A806GQ30	604287	604755	466	+	MFS_1; InterPro=IPR036259; IPR011701; IPR020846
Corynebacterium diphtheriae (strain ATCC 27012 / C7 (beta)	A0A806GE16	604754	605066	311	+	IU_nuc_hydro; InterPro=IPR036452; IPR001910; IPR023186
Corynebacterium diphtheriae (strain ATCC 27012 / C7 (beta)	A0A806GS39	605068	605337	267	+	none
Corynebacterium diphtheriae (strain ATCC 27012 / C7 (beta)	A0A806GI95	605349	605569	218	+	none
Corynebacterium diphtheriae (strain ATCC 27012 / C7 (beta)	A0A806GZ89	605614	606544	928	+	MmeI_N; MmeI_hel; MmeI_TRD; MmeI_C; MmeI_Mtase; InterPro=IPR029063; IPR046817; IPR046819; IPR046820; IPR046818; IPR046816
Corynebacterium diphtheriae (strain ATCC 27012 / C7 (beta)	A0A806GUE1	606543	606849	305	+	Mrr_cat; Mrr_N; InterPro=IPR011856; IPR007560; IPR025745; IPR011335
Corynebacterium diphtheriae (strain ATCC 27012 / C7 (beta)	A0A806GXJ5	606940	606986	45	-	none
Corynebacterium diphtheriae (strain ATCC 27012 / C7 (beta)	A0A806GFN1	607020	607222	201	-	Abi_2; InterPro=IPR011664
Corynebacterium diphtheriae (strain ATCC 27012 / C7 (beta)	A0A806GM90	607399	608039	639	-	GTP_EFTU; EFG_C; GTP_EFTU_D2; LepA_C; InterPro=IPR038363; IPR027417; IPR006297; IPR000795; IPR000640; IPR004161; IPR013842; IPR009000; IPR035647; IPR005225; IPR035654
Corynebacterium diphtheriae (strain ATCC 27012 / C7 (beta)	A0A806GS42	608102	608288	184	+	PemK_toxin; InterPro=IPR003477
Corynebacterium diphtheriae (strain ATCC 27012 / C7 (beta)	A0A806GQ37	608342	608429	86	+	Ribosomal_S20p; InterPro=IPR036510; IPR002583
Corynebacterium diphtheriae (strain ATCC 27012 / C7 (beta)	A0A806GE30	608446	608688	241	-	LysE; InterPro=IPR001123
Corynebacterium matruchotii ATCC 33806	C0E7A8	92281	92425	142	+	none
Corynebacterium matruchotii ATCC 33806	C0E7A9	92420	92469	47	-	none
Corynebacterium matruchotii ATCC 33806	C0E7B0	92469	92933	463	+	HisKA; HAMP; HATPase_c; InterPro=IPR036890; IPR003661; IPR003660; IPR003594; IPR004358; IPR005467; IPR036097
Corynebacterium matruchotii ATCC 33806	C0E7B1	92934	93156	221	+	Response_reg; Trans_reg_C; InterPro=IPR036388; IPR001789; IPR001867; IPR039420; IPR011006
Corynebacterium matruchotii ATCC 33806	C0E7B2	93199	93914	714	-	DEAD; Helicase_C; DbpA; InterPro=IPR012677; IPR027417; IPR028618; IPR011545; IPR001650; IPR005580; IPR014001; IPR014014; IPR034415
Corynebacterium matruchotii ATCC 33806	C0E7B3	93927	94458	529	-	NUDIX; PTR2; MFS_1; InterPro=IPR036259; IPR000086; IPR000109; IPR011701; IPR020476; IPR001958; IPR020846; IPR015797
Corynebacterium matruchotii ATCC 33806	C0E7B4	94495	94664	167	+	none
Corynebacterium matruchotii ATCC 33806	C0E7B5	94655	95024	368	-	ABC_tran; InterPro=IPR027417; IPR003439; IPR015854; IPR003593
Corynebacterium matruchotii ATCC 33806	C0E7B6	95023	95242	217	-	none
Corynebacterium matruchotii ATCC 33806	C0E7B7	95238	95485	246	-	none
Corynebacterium matruchotii ATCC 33806	C0E7B8	95509	95869	358	-	IU_nuc_hydro; InterPro=IPR036452; IPR001910; IPR023186
Corynebacterium matruchotii ATCC 33806	C0E7B9	95855	96128	271	-	none
Corynebacterium matruchotii ATCC 33806	C0E7C0	96158	96423	263	-	FhuF_C; InterPro=IPR024726
Corynebacterium matruchotii ATCC 33806	C0E7C1	96463	96870	405	-	COesterase; InterPro=IPR029058; IPR002018
Corynebacterium matruchotii ATCC 33806	C0E7C2	96871	97039	166	+	none
Corynebacterium matruchotii ATCC 33806	C0E7C3	97041	97311	269	+	Shikimate_dh_N; InterPro=IPR013708; IPR022893; IPR036291; IPR046346
Corynebacterium matruchotii ATCC 33806	C0E7C4	97359	97602	242	+	none
Corynebacterium matruchotii ATCC 33806	C0E7C5	97607	98240	632	+	ABC_tran; ABC_membrane; InterPro=IPR036640; IPR027417; IPR003439; IPR011527; IPR039421; IPR003593
Corynebacterium matruchotii ATCC 33806	C0E7C6	98300	98919	617	+	ABC_tran; ABC_membrane; InterPro=IPR036640; IPR027417; IPR003439; IPR011527; IPR039421; IPR003593
Corynebacterium matruchotii ATCC 33806	C0E7C7	98968	100229	1259	+	2-oxoacid_dh; E1_dh; Transket_pyr; 2-oxogl_dehyd_N; OxoGdeHyase_C; InterPro=IPR023213; IPR042179; IPR001078; IPR001017; IPR005475; IPR032106; IPR031717; IPR011603; IPR029061
Corynebacterium matruchotii ATCC 33806	C0E7C8	100238	100286	46	+	none
Bartonella henselae (strain ATCC 49882 / DSM 28221 / CCUG 30454 / Houston1)	A0A0H3LYU9	366348	366456	106	-	Fe; S_biosyn; InterPro=IPR035903; IPR000361; IPR016092
Bartonella henselae (strain ATCC 49882 / DSM 28221 / CCUG 30454 / Houston1)	Q6G317	366492	366893	399	+	HD; HD_assoc; InterPro=IPR023023; IPR006674; IPR026875; IPR003607; IPR006261
Bartonella henselae (strain ATCC 49882 / DSM 28221 / CCUG 30454 / Houston1)	Q6G316	366903	367489	584	+	tRNA-synt_1d; Arg_tRNA_synt_N; DALR_1; InterPro=IPR036695; IPR014729; IPR001278; IPR035684; IPR005148; IPR008909; IPR009080
Bartonella henselae (strain ATCC 49882 / DSM 28221 / CCUG 30454 / Houston1)	A0A0H3M5Z2	367537	368376	838	+	SPOR; InterPro=IPR036680; IPR007730
Bartonella henselae (strain ATCC 49882 / DSM 28221 / CCUG 30454 / Houston1)	A0A0H3LXL2	368440	368532	90	-	none
Bartonella henselae (strain ATCC 49882 / DSM 28221 / CCUG 30454 / Houston1)	A0A0H3LX13	368634	369003	367	+	Aminotran_4; InterPro=IPR043132; IPR043131; IPR001544; IPR005786; IPR036038; IPR033939
Bartonella henselae (strain ATCC 49882 / DSM 28221 / CCUG 30454 / Houston1)	A0A0H3M3L5	369045	369374	327	-	FBPase_glpX; InterPro=IPR004464
Bartonella henselae (strain ATCC 49882 / DSM 28221 / CCUG 30454 / Houston1)	A0A0H3LYV4	369425	369861	435	-	Homoserine_dh; ACT; NAD_binding_3; InterPro=IPR001342; IPR002912; IPR005106; IPR016204; IPR036291; IPR045865
Bartonella henselae (strain ATCC 49882 / DSM 28221 / CCUG 30454 / Houston1)	A0A0H3M5Z6	370617	371021	403	+	Iso_dh; InterPro=IPR024084; IPR004790
Bartonella henselae (strain ATCC 49882 / DSM 28221 / CCUG 30454 / Houston1)	A0A0H3LXL7	371060	371536	474	+	MFS_1; InterPro=IPR036259; IPR011701; IPR020846
Bartonella henselae (strain ATCC 49882 / DSM 28221 / CCUG 30454 / Houston1)	A0A0H3LX18	371551	371948	395	-	MFS_1; InterPro=IPR036259; IPR011701; IPR020846
Bartonella henselae (strain ATCC 49882 / DSM 28221 / CCUG 30454 / Houston1)	A0A0R4J8M4	372213	372586	371	-	TGT; InterPro=IPR036511; IPR004803; IPR002616
Bartonella henselae (strain ATCC 49882 / DSM 28221 / CCUG 30454 / Houston1)	A0A0H3LYV9	372974	373145	169	-	Pro_isomerase; InterPro=IPR029000; IPR002130; IPR024936; IPR044666
Bartonella henselae (strain ATCC 49882 / DSM 28221 / CCUG 30454 / Houston1)	A0A0H3M5Z8	373152	373343	189	-	Pro_isomerase; InterPro=IPR029000; IPR002130; IPR024936; IPR044666
Bartonella henselae (strain ATCC 49882 / DSM 28221 / CCUG 30454 / Houston1)	Q6G304	373340	373517	176	-	CTP_transf_like; InterPro=IPR014729; IPR001980; IPR004821
Bartonella henselae (strain ATCC 49882 / DSM 28221 / CCUG 30454 / Houston1)	A0A0H3LXM2	373521	374452	930	-	DNA_topoisoIV; DNA_gyraseA_C; InterPro=IPR013757; IPR035516; IPR013758; IPR005743; IPR002205; IPR013760
Bartonella henselae (strain ATCC 49882 / DSM 28221 / CCUG 30454 / Houston1)	A0A0H3LX24	374530	374703	171	-	SSB; InterPro=IPR012340; IPR011344; IPR000424
Bartonella henselae (strain ATCC 49882 / DSM 28221 / CCUG 30454 / Houston1)	A0A0H3M3M3	374816	375788	970	+	UvrA_DNA-bind; UvrA_inter; InterPro=IPR027417; IPR004602; IPR041552; IPR041102; IPR003439
Bartonella henselae (strain ATCC 49882 / DSM 28221 / CCUG 30454 / Houston1)	A0A0H3LYW4	375880	375993	111	+	P; II; InterPro=IPR015867; IPR002187; IPR011322
Bartonella henselae (strain ATCC 49882 / DSM 28221 / CCUG 30454 / Houston1)	A0A0H3M5Z9	376012	376482	468	+	Gln-synt_C; Gln-synt_N; InterPro=IPR036651; IPR008146; IPR008147; IPR014746; IPR004809
Bartonella henselae (strain ATCC 49882 / DSM 28221 / CCUG 30454 / Houston1)	A0A0R4J9E4	376532	376714	180	+	none
Bifidobacterium breve	A0A0M3T8W3	684146	684493	345	-	CRCB; InterPro=IPR003691
Bifidobacterium breve	A0A0M4MCC8	684555	685083	526	-	Voltage_CLC; TrkA_C; InterPro=IPR036721; IPR001807; IPR006037; IPR014743
Bifidobacterium breve	A0A0M5KZA5	685091	685519	427	-	Adenylsucc_synt; InterPro=IPR042110; IPR042109; IPR042111; IPR001114; IPR027417
Bifidobacterium breve	A0A0M4MNX8	685571	685926	354	-	F_bP_aldolase; InterPro=IPR013785; IPR000771; IPR006411
Bifidobacterium breve	A0A0M3T931	685947	686259	310	-	EamA; InterPro=IPR000620
Bifidobacterium breve	A0A0M4LQW6	686348	686661	312	-	Peptidase_M48; InterPro=IPR022919; IPR001915
Bifidobacterium breve	A0A0M4M3P1	686790	687273	482	-	Pyr_redox_2; InterPro=IPR036188; IPR023753; IPR021163
Bifidobacterium breve	A0A0M5L439	687403	688224	820	-	E1-E2_ATPase; Hydrolase; Hydrolase_3; InterPro=IPR023299; IPR023214; IPR036412; IPR008250; IPR023298; IPR001757
Bifidobacterium breve	A0A0M4MR77	688412	689064	650	-	PDZ_2; Trypsin_2; InterPro=IPR036034; IPR001478; IPR001940; IPR009003
Bifidobacterium breve	A0A0M4M3B3	689198	689636	436	+	TGT; InterPro=IPR036511; IPR004803; IPR002616
Bifidobacterium breve	A0A0M3T8W5	689798	690083	284	+	HlyIII; InterPro=IPR004254
Bifidobacterium breve	A0A0M4M094	690104	690214	109	-	YbjQ_1; InterPro=IPR002765; IPR035439
Bifidobacterium breve	A0A0L0LUK4	690293	690431	136	+	NUDIX; InterPro=IPR000086; IPR047127; IPR015797
Bifidobacterium breve	A0A0M4MCD7	690451	691520	1067	+	Helicase_C; ResIII; DUF3427; PLDc_2; InterPro=IPR027417; IPR001650; IPR006935; IPR021835; IPR025202; IPR014001
Bifidobacterium breve	A0A0M3T933	691935	692289	352	+	Fic; InterPro=IPR036388; IPR036597; IPR003812; IPR040198
Bifidobacterium breve	A0A0M5L5U8	692302	692544	240	-	Pyridox_ox_2; InterPro=IPR012349; IPR024747
Bifidobacterium breve	A0A0M4MNY8	692568	692910	340	-	PMSR; SelR; InterPro=IPR036509; IPR002569; IPR002579; IPR028427; IPR011057
Bifidobacterium breve	A0A0M4LQX5	693107	693981	873	-	LPG_synthase_C; InterPro=IPR024320; IPR035952
Bifidobacterium breve	A0A0M4M3P7	693980	694441	459	-	Esterase; InterPro=IPR029058; IPR000801
Bifidobacterium breve	A0A0M5KXH5	694551	694609	56	+	none
Bifidobacterium breve	A0A0M3T8W7	695108	695276	166	-	HSP20; InterPro=IPR008978; IPR002068; IPR031107
Flavobacteriaceae bacterium	A0A2D7M939	1316	1408	90	+	ClpS; InterPro=IPR014719; IPR003769
Flavobacteriaceae bacterium	A0A2D7M928	1411	1873	460	+	GFO_IDH_MocA; Glyco_hydro_109_C; InterPro=IPR000683; IPR049303; IPR036291
Flavobacteriaceae bacterium	A0A2D7M950	1873	2227	352	+	GHMP_kinases_N; GHMP_kinases_C; GalKase_gal_bdg; InterPro=IPR014721; IPR036554; IPR006204; IPR013750; IPR019539; IPR000705; IPR020568
Flavobacteriaceae bacterium	A0A2D7M936	2226	2501	274	+	NTP_transferase; InterPro=IPR029044; IPR005835
Flavobacteriaceae bacterium	A0A2D7M930	2500	2744	242	-	SIMPL; InterPro=IPR007497; IPR016907
Flavobacteriaceae bacterium	A0A2D7M969	2762	2959	196	-	none
Flavobacteriaceae bacterium	A0A2D7M925	2984	3388	402	-	MFS_1; InterPro=IPR036259; IPR011701; IPR020846
Flavobacteriaceae bacterium	A0A2D7M932	3579	3828	247	+	none
Flavobacteriaceae bacterium	A0A2D7M929	3830	3974	143	+	none
Flavobacteriaceae bacterium	A0A2D7M931	3976	4096	118	+	Cupin_2; InterPro=IPR014710; IPR013096; IPR011051
Flavobacteriaceae bacterium	A0A2D7M949	4095	4417	320	-	IU_nuc_hydro; InterPro=IPR036452; IPR001910; IPR023186
Flavobacteriaceae bacterium	A0A2D7M944	4417	4719	300	-	PfkB; InterPro=IPR029056; IPR011877; IPR011611; IPR002139
Flavobacteriaceae bacterium	A0A2D7M959	4719	5051	330	-	Ureide_permease; InterPro=IPR009834; IPR010651
Flavobacteriaceae bacterium	A0A2D7M948	5074	5583	507	-	ADP_ribosyl_GH; InterPro=IPR036705; IPR005502
Flavobacteriaceae bacterium	A0A2D7M937	5643	5904	259	-	DUF3050; InterPro=IPR016084; IPR024423
Flavobacteriaceae bacterium	A0A2D7M980	5920	6949	1028	-	Sortilin; Vps10; InterPro=IPR015943; IPR031778; IPR036278
Flavobacteriaceae bacterium	A0A2D7M935	6997	7817	819	-	Glyco_hyd_65N_2; Glyco_hydro_95_C; InterPro=IPR012341; IPR027414; IPR049053; IPR016518; IPR008928
Flavobacteriaceae bacterium	A0A2D7M942	7951	8002	50	-	none
Flavobacteriaceae bacterium	A0A2D7M938	8002	8223	219	-	none; InterPro=IPR037066
Flavobacteriaceae bacterium	A0A2D7M943	8305	8388	81	+	none
Flavobacteriaceae bacterium	A0A2D7M965	8550	8690	138	-	none
Corynebacterium variabile (strain DSM 44702 / CIP 107183 / JCM 12073 /NCIMB 30131)	G0HG07	955164	955440	274	-	AraC_binding; HTH_18; InterPro=IPR003313; IPR018060; IPR020449; IPR009057; IPR037923
Corynebacterium variabile (strain DSM 44702 / CIP 107183 / JCM 12073 /NCIMB 30131)	G0HG08	955519	955799	279	+	Peripla_BP_2; InterPro=IPR002491
Corynebacterium variabile (strain DSM 44702 / CIP 107183 / JCM 12073 /NCIMB 30131)	G0HG09	955817	956020	201	+	none; InterPro=IPR001647; IPR009057
Corynebacterium variabile (strain DSM 44702 / CIP 107183 / JCM 12073 /NCIMB 30131)	G0HG10	956029	956314	283	+	ECH_1; InterPro=IPR001753; IPR045002; IPR029045
Corynebacterium variabile (strain DSM 44702 / CIP 107183 / JCM 12073 /NCIMB 30131)	G0HG11	956314	956552	236	-	tRNA; synt_1c; InterPro=IPR014729; IPR020058
Corynebacterium variabile (strain DSM 44702 / CIP 107183 / JCM 12073 /NCIMB 30131)	G0HG12	956599	956861	260	+	PadR; InterPro=IPR036388; IPR005149; IPR036390
Corynebacterium variabile (strain DSM 44702 / CIP 107183 / JCM 12073 /NCIMB 30131)	G0HG13	956860	957437	576	+	ABC1; InterPro=IPR004147; IPR011009
Corynebacterium variabile (strain DSM 44702 / CIP 107183 / JCM 12073 /NCIMB 30131)	G0HG14	957466	957754	286	-	none; InterPro=IPR005302; IPR011037
Corynebacterium variabile (strain DSM 44702 / CIP 107183 / JCM 12073 /NCIMB 30131)	G0HG15	957756	958129	371	-	ADH_zinc_N; ADH_N_2; InterPro=IPR013149; IPR041694; IPR045010; IPR020843; IPR011032; IPR036291
Corynebacterium variabile (strain DSM 44702 / CIP 107183 / JCM 12073 /NCIMB 30131)	G0HG16	958154	958253	97	-	none
Corynebacterium variabile (strain DSM 44702 / CIP 107183 / JCM 12073 /NCIMB 30131)	G0HG17	958269	958730	459	+	TGT; InterPro=IPR036511; IPR004803; IPR002616
Corynebacterium variabile (strain DSM 44702 / CIP 107183 / JCM 12073 /NCIMB 30131)	G0HG18	959010	959862	850	-	MMPL; InterPro=IPR004869; IPR001036; IPR000731
Corynebacterium variabile (strain DSM 44702 / CIP 107183 / JCM 12073 /NCIMB 30131)	G0HG19	959876	960547	669	-	Acyl_transf_3; InterPro=IPR036514; IPR002656
Corynebacterium variabile (strain DSM 44702 / CIP 107183 / JCM 12073 /NCIMB 30131)	G0HG20	960766	960909	141	-	MafB19; deam; InterPro=IPR028883; IPR002125; IPR016193
Corynebacterium variabile (strain DSM 44702 / CIP 107183 / JCM 12073 /NCIMB 30131)	G0HG21	960929	961107	177	-	none; InterPro=IPR023869
Corynebacterium variabile (strain DSM 44702 / CIP 107183 / JCM 12073 /NCIMB 30131)	G0HG22	961149	961477	326	+	PDH_N; PDH_C; InterPro=IPR046826; IPR046825; IPR003099; IPR008927; IPR036291
Corynebacterium variabile (strain DSM 44702 / CIP 107183 / JCM 12073 /NCIMB 30131)	G0HG23	961484	961822	337	-	none; InterPro=IPR012338
Corynebacterium variabile (strain DSM 44702 / CIP 107183 / JCM 12073 /NCIMB 30131)	G0HG24	961835	962069	232	-	none; InterPro=IPR012338
Corynebacterium variabile (strain DSM 44702 / CIP 107183 / JCM 12073 /NCIMB 30131)	G0HG25	962141	962401	258	-	none
Corynebacterium variabile (strain DSM 44702 / CIP 107183 / JCM 12073 /NCIMB 30131)	G0HG26	962416	962744	326	-	none; InterPro=IPR012338
Corynebacterium variabile (strain DSM 44702 / CIP 107183 / JCM 12073 /NCIMB 30131)	G0HG27	962839	963416	576	+	HisKA_3; InterPro=IPR036890; IPR011712

## Sheet: S4
Table S4. UniPprot identifiers for predicted preQ1 transporter subgroups of the PF07168, PF03006, and PF07690 families.
Pfam family	Uniprot ID	Organism	Description		Pfam family	Uniprot ID	Organism	Description		Pfam family	Uniprot ID	Organism	Description
PF07168	A0A2V8XVE0	Acidobacteriota bacterium.	Multidrug DMT transporter permease		PF03006	A0A261F9S4	Aeriscardovia aeriphila.	Hemolysin III		PF07690	A0A8J7VQI6	Coralloluteibacterium stylophorae	MFS transporter
PF07168	A0A7W7ZUZ9	Granulicella mallensis.	Glucose uptake protein		PF03006	A0A921KBI7	Aeriscardovia aeriphila.	Hemolysin III family protein		PF07690	A0A2N5C3R2	Cupriavidus pauculus	MFS transporter
PF07168	A0A953TKY0	Terriglobia bacterium.	Multidrug DMT transporter permease		PF03006	A0A9D8TSS1	Aeriscardovia sp.	Hemolysin III family protein		PF07690	A0A5P2HCN7	Cupriavidus pauculus	MFS transporter
PF07168	T1CLW1	mine drainage metagenome.	Integral membrane protein		PF03006	A0A9D8XZF7	Aeriscardovia sp.	Hemolysin III family protein		PF07690	A0A316ENA5	Cupriavidus plantarum	DHA1 family inner membrane transport protein
PF07168	A0A9E3A969	Acidobacteriota bacterium.	Multidrug DMT transporter permease		PF03006	A0A7J5LI76	Bacteroides stercoris.	Hemolysin III family protein		PF07690	A0A4R3I0D1	Paucimonas lemoignei (Pseudomonas lemoignei)	DHA1 family inner membrane transport protein
PF07168	A0A1H5U567	Bryocella elongata.	Glucose uptake protein		PF03006	A0A086Z020	Bifidobacterium actinocoloniiforme DSM 22766.	Hemolysin III family protein		PF07690	A0A378YZC4	Pandoraea pulmonicola	Inner membrane transport protein ydhP
PF07168	A0A951CX16	Acidobacteriaceae bacterium.	AcrB/AcrD/AcrF family protein		PF03006	A1A151	Bifidobacterium adolescentis (strain ATCC 15703 / DSM 20083 / NCTC 11814 /E194a)	Hemolysin III		PF07690	A0A3G2HVS5	Alcaligenes aquatilis	MFS transporter
PF07168	A0A2V9S5F0	Acidobacteriota bacterium.	Multidrug DMT transporter permease		PF03006	R5H166	Bifidobacterium adolescentis CAG:119.	Hemolysin III		PF07690	U1ZSG7	Alcaligenes sp. EGD-AK7	MFS transporter
PF07168	A0A2V9HL42	Acidobacteriota bacterium.	Multidrug DMT transporter permease		PF03006	A0A087DKD9	Bifidobacterium adolescentis JCM 15918.	Hemolysin-III related protein		PF07690	A0A9N7DNW1	Alcaligenes faecalis	MFS transporter
PF07168	A0A2V9VJF8	Acidobacteriota bacterium.	Multidrug DMT transporter permease		PF03006	A7A689	Bifidobacterium adolescentis L2-32.	Channel protein_x000D_ hemolysin III family		PF07690	A0A2U2BP34	Alcaligenes faecalis	MFS transporter
PF07168	A0A428MK16	Edaphobacter aggregans.	Glucose uptake protein		PF03006	A0A2R4G2R8	Bifidobacterium adolescentis.	Hemolysin III		PF07690	A0A5Q0DM89	Alcaligenes faecalis	MFS transporter
PF07168	A0A2V9TD58	Acidobacteriota bacterium.	Multidrug DMT transporter permease		PF03006	A0A1X3A761	Bifidobacterium adolescentis.	HemolysinIII-like protein		PF07690	A0A4V1EKK0	Alcaligenes faecalis	MFS transporter
PF07168	A0A2V9A602	Acidobacteriota bacterium.	Multidrug DMT transporter permease		PF03006	A0A1E7XZB4	Bifidobacterium adolescentis.	Hemolysin III		PF07690	A0A3G6HK28	Alcaligenes faecalis	MFS transporter
PF07168	A0A2V9U0M9	Acidobacteriota bacterium.	Multidrug DMT transporter permease		PF03006	A0A0B5BG03	Bifidobacterium adolescentis.	Hemolysin III		PF07690	A0A8H9IG68	Alcaligenes pakistanensis	MFS transporter
PF07168	A0A2V9XYG5	Acidobacteriota bacterium.	Multidrug DMT transporter permease		PF03006	A0A1X2Z3Z0	Bifidobacterium adolescentis.	HemolysinIII-like protein		PF07690	A0A1C3K5I0	Orrella dioscoreae	Major facilitator superfamily (MFS) profile domain-containing protein
PF07168	G8NSM4	Granulicella mallensis (strain ATCC BAA-1857 / DSM 23137 / MP5ACTX8)	Sugar transport family protein		PF03006	A0A076JGH3	Bifidobacterium adolescentis.	Hemolysin III family protein		PF07690	A0A4Y9QGX2	Oxalobacteraceae bacterium OM1	MFS transporter
PF07168	A0A2W0AKR2	Acidobacteriota bacterium.	Multidrug DMT transporter permease		PF03006	A0A0G9MEK1	Bifidobacterium adolescentis.	Hemolysin III		PF07690	A0A5C7V3Q0	Pelomonas sp	MFS transporter
PF07168	A0A2V9TJF6	Acidobacteriota bacterium.	Multidrug DMT transporter permease		PF03006	A0A1V8QCA8	Bifidobacterium adolescentis.	Hemolysin III		PF07690	A0A1G6PMW0	Variovorax sp. CF079	MFS transporter, DHA1 family, inner membrane transport protein
PF07168	A0A382E2R1	marine metagenome.	EamA domain-containing protein		PF03006	A0A6N9Z5H6	Bifidobacterium aerophilum.	Hemolysin III family protein		PF07690	A0A431TIA2	Variovorax gossypii	MFS transporter
PF07168	A0A1Q7CBL8	Acidobacteria bacterium 13_2_20CM_2_57_6.	Multidrug DMT transporter permease		PF03006	C4FFS8	Bifidobacterium angulatum DSM 20098 = JCM 7096.	Channel protein_x000D_ hemolysin III family		PF07690	A0A2G6WVH0	Variovorax sp. 54	DHA1 family inner membrane transport protein
PF07168	A0A2V8WYT5	Acidobacteriota bacterium.	Multidrug DMT transporter permease		PF03006	A0A126SWJ5	Bifidobacterium angulatum.	Hemolysin III		PF07690	A0A7G8W5K0	Variovorax sp. PAMC28562	MFS transporter
PF07168	A0A953U3F4	Terriglobia bacterium.	GRP family sugar transporter		PF03006	A0A7V8LFV4	Bifidobacterium animalis subsp. animalis MCC 0499.	Hemolysin III		PF07690	A0A7L8SCE8	Variovorax sp. 38R	MFS transporter
PF07168	A0A953UX37	Terriglobia bacterium.	AcrB/AcrD/AcrF family protein		PF03006	A0A7V8LII6	Bifidobacterium animalis subsp. animalis MCC 0499.	Hemolysin III		PF07690	A0A554S589	Variovorax sp. KBS0712	MFS transporter
PF07168	A0A2V9H268	Acidobacteriota bacterium.	Multidrug DMT transporter permease		PF03006	A0A0L7CUK1	Bifidobacterium animalis subsp. animalis MCC 1489.	Hemolysin III		PF07690	A0A5Q0MCC4	Variovorax paradoxus	MFS transporter
PF07168	A0A1Q7N556	Acidobacteriales bacterium 13_1_40CM_3_55_5.	Multidrug DMT transporter permease		PF03006	A0A0L7CSY7	Bifidobacterium animalis subsp. animalis MCC 1489.	Hemolysin III		PF07690	A0A3R9XHL2	Variovorax sp. MHTC-1	MFS transporter
PF07168	A0A2V9NCL4	Acidobacteriota bacterium.	Multidrug DMT transporter permease		PF03006	A0A315S344	Bifidobacterium animalis subsp. lactis	Hemolysin III		PF07690	A0A2P1VG48	Variovorax sp. PMC12	MFS transporter
PF07168	A0A2V9VN88	Acidobacteriota bacterium.	Multidrug DMT transporter permease		PF03006	A0A8B3RHG5	Bifidobacterium animalis subsp. lactis	Hemolysin III		PF07690	A0A520H2T4	Variovorax sp	MFS transporter
PF07168	A0A2V9R5E6	Acidobacteriota bacterium.	Multidrug DMT transporter permease		PF03006	A0A315S8N1	Bifidobacterium animalis subsp. lactis	Hemolysin III		PF07690	A0A126Z982	Variovorax sp. PAMC 28711	MFS transporter
PF07168	A0A949U2R0	Acidobacteriaceae bacterium.	AcrB/AcrD/AcrF family protein		PF03006	A0A8B3RFG3	Bifidobacterium animalis subsp. lactis	Hemolysin III		PF07690	A0A1H7LW20	Variovorax sp. YR750	MFS transporter, DHA1 family, inner membrane transport protein
PF07168	A0A2V9WUU7	Acidobacteriota bacterium.	Multidrug DMT transporter permease		PF03006	B8DV14	Bifidobacterium animalis subsp. lactis (strain AD011)	Predicted membrane protein_x000D_ hemolysin III		PF07690	A0A1P8JWK9	Rhodoferax koreense	MFS transporter
PF07168	A0A2U3KCN0	Candidatus Sulfotelmatobacter kueseliae.	Sugar transport family protein		PF03006	B8DTJ7	Bifidobacterium animalis subsp. lactis (strain AD011)	Predicted membrane protein_x000D_ hemolysin III-like protein		PF07690	A0A4Q3LX37	Comamonadaceae bacterium	MFS transporter
PF07168	A0A1Q7CL51	Acidobacteriales bacterium 13_2_20CM_2_55_5.	Multidrug DMT transporter permease		PF03006	A0A806FYE0	Bifidobacterium animalis subsp. lactis CNCM I-2494.	Conserved membrane protein (Hemolysin III-like protein)		PF07690	N6XWH2	Thauera linaloolentis (strain DSM 12138 / CCUG 41526 / CIP 105981 / IAM 15112 / NBRC 102519 / 47Lol)	Major facilitator superfamily transporter
PF07168	A0A2V7X371	Acidobacteriota bacterium.	Multidrug DMT transporter permease		PF03006	A0A806FNT2	Bifidobacterium animalis subsp. lactis CNCM I-2494.	Conserved membrane protein (Hemolysin III-like protein)		PF07690	A0A1M6URU6	Bradyrhizobium lablabi	MFS transporter, DHA1 family, inner membrane transport protein
PF07168	A0A2V9W5C9	Acidobacteriota bacterium.	Multidrug DMT transporter permease		PF03006	A0A7T8VBK7	Bifidobacterium animalis.	Hemolysin III family protein		PF07690	A0A2M6UWM5	Bartonella tribocorum	MFS transporter
PF07168	A0A2V8Z759	Acidobacteriota bacterium.	Multidrug DMT transporter permease		PF03006	A0A7T8ZTX0	Bifidobacterium animalis.	Hemolysin III family protein		PF07690	A0A2M6UT33	Bartonella tribocorum	MFS transporter
PF07168	A0A2V8WGJ5	Acidobacteriota bacterium.	Multidrug DMT transporter permease		PF03006	A0A2N5J1N1	Bifidobacterium anseris.	Hemolysin III		PF07690	J0Q3A6	Bartonella sp. DB5-6	Major facilitator superfamily (MFS) profile domain-containing protein
PF07168	A0A1Q7YRM7	Chloroflexi bacterium 13_1_20CM_2_59_7.	Multidrug DMT transporter permease		PF03006	A0A6A2VUF8	Bifidobacterium apri.	Hemolysin III		PF07690	E6YLH9	Bartonella rochalimae ATCC BAA-1498	Transport transmembrane protein
PF07168	T1CBF9	mine drainage metagenome.	Integral membrane protein		PF03006	A0A261G6M4	Bifidobacterium aquikefiri.	Hemolysin III		PF07690	J1JNZ3	Bartonella washoeensis 085-0475	Major facilitator superfamily (MFS) profile domain-containing protein
PF07168	A0A2N9N9H1	Candidatus Sulfotelmatobacter sp. SbA7.	Sugar transport family protein		PF03006	K4IR63	Bifidobacterium asteroides (strain PRL2011)	Hemolysin III family protein		PF07690	A0A840NK18	Bartonella callosciuri	DHA1 family inner membrane transport protein
PF07168	A0A1Q7XU01	Acidobacteria bacterium 13_1_20CM_3_58_11.	Multidrug DMT transporter permease		PF03006	A0A556R2S5	Bifidobacterium asteroides.	Hemolysin III family protein		PF07690	E6YVA5	Bartonella sp. 1-1C	MFS transporter, DHA1 family, inner membrane transport protein (Transport transmembrane protein)
PF07168	A0A2V9ZBN6	Acidobacteriota bacterium.	Multidrug DMT transporter permease		PF03006	A0A0F4KW05	Bifidobacterium asteroides.	Hemolysin III family protein		PF07690	A0A448V6U0	Bartonella vinsonii (Rochalimaea vinsonii)	Inner membrane transport protein ydhP
PF07168	A0A2V8X7P9	Acidobacteriota bacterium.	Multidrug DMT transporter permease		PF03006	A0A0F4KT97	Bifidobacterium asteroides.	Hemolysin III		PF07690	J0ZZ77	Bartonella elizabethae F9251 = ATCC 49927	Major facilitator superfamily (MFS) profile domain-containing protein
PF07168	A0A2V9ULI0	Acidobacteriota bacterium.	Multidrug DMT transporter permease		PF03006	A0A318MIB4	Bifidobacterium asteroides.	Hemolysin III		PF07690	A0A0H3LX18	Bartonella henselae (strain ATCC 49882 / DSM 28221 / CCUG 30454 / Houston 1) (Rochalimaea henselae)	Transport transmembrane protein
PF07168	A0A2E9NJX8	Acidobacteriota bacterium.	Multidrug DMT transporter permease		PF03006	A0A0F4M227	Bifidobacterium asteroides.	Hemolysin III family protein		PF07690	A0A1U9MBI3	Bartonella apis	MFS transporter, DHA1 family, arabinose polymer transporter
PF07168	A0A2V9ZNG7	Acidobacteriota bacterium.	Multidrug DMT transporter permease		PF03006	A0A6N7TTR4	Bifidobacterium asteroides.	Hemolysin III family protein		PF07690	A0A1R0F6T7	Bartonella apis	MFS transporter, DHA1 family, arabinose polymer transporter
PF07168	A0A953PTV2	Terriglobia bacterium.	AcrB/AcrD/AcrF family protein		PF03006	A0A318M6A4	Bifidobacterium asteroides.	Hemolysin III		PF07690	A0A1U9MIA1	Bartonella apis	MFS transporter, DHA1 family, arabinose polymer transporter
PF07168	A0A2V9SZ42	Acidobacteriota bacterium.	Multidrug DMT transporter permease		PF03006	A0A318MGF8	Bifidobacterium asteroides.	Hemolysin III		PF07690	J1JSL1	Bartonella rattimassiliensis 15908	Major facilitator superfamily (MFS) profile domain-containing protein
PF07168	A0A932LN52	Acidobacteriota bacterium.	Multidrug DMT transporter permease		PF03006	A0A7K3TGY8	Bifidobacterium avesanii.	Hemolysin III family protein		PF07690	J1JWI1	Bartonella tamiae Th239	Major facilitator superfamily (MFS) profile domain-containing protein
PF07168	A0A2D6R1F0	Acidobacteriota bacterium.	Multidrug DMT transporter permease		PF03006	A0A7K3THP4	Bifidobacterium avesanii.	Hemolysin III family protein		PF07690	A0A9P2W2X9	Bartonella taylorii 8TBB	Major facilitator superfamily (MFS) profile domain-containing protein
					PF03006	A0A086ZUK9	Bifidobacterium biavatii DSM 23969.	Hemolysin III		PF07690	J1K0E8	Bartonella vinsonii subsp. arupensis OK-94-513	Major facilitator superfamily (MFS) profile domain-containing protein
					PF03006	A0A0H3EC00	Bifidobacterium bifidum (strain PRL2010)	HemolysinIII-like protein		PF07690	A0A380ZDP0	Bartonella doshiae	Inner membrane transport protein ydhP
					PF03006	A0A0H3EEP2	Bifidobacterium bifidum (strain PRL2010)	Putative hemolysin III-like membrane protein		PF07690	A9IVS8	Bartonella tribocorum (strain CIP 105476 / IBS 506)	Transport transmembrane protein
					PF03006	I3WHE8	Bifidobacterium bifidum BGN4.	Conserved hypothetical membrane protein		PF07690	A0A067W3T0	Bartonella koehlerae C-29	Major facilitator superfamily (MFS) profile domain-containing protein
					PF03006	I3WKB6	Bifidobacterium bifidum BGN4.	Conserved hypothetical membrane protein		PF07690	A0A5B9CVT9	Bartonella kosoyi	MFS transporter
					PF03006	R6G9E9	Bifidobacterium bifidum CAG:234.	Hemolysin III family related membrane protein		PF07690	J0PTF7	Bartonella alsatica IBS 382	Major facilitator superfamily (MFS) profile domain-containing protein
					PF03006	R6GA66	Bifidobacterium bifidum CAG:234.	Conserved hypothetical membrane protein		PF07690	X5MHM9	Bartonella henselae (Rochalimaea henselae)	Putative permease of the major facilitator superfamily protein
					PF03006	K2MD40	Bifidobacterium bifidum IPLA 20015.	HemolysinIII-like protein		PF07690	A0A1S6XHA2	Bartonella sp. JB15	MFS transporter, DHA1 family, inner membrane transport protein
					PF03006	K2LY27	Bifidobacterium bifidum IPLA 20015.	Hemolysin III		PF07690	A0A840DUU3	Bartonella fuyuanensis	DHA1 family inner membrane transport protein
					PF03006	A0A286TEJ5	Bifidobacterium bifidum LMG 13195.	HemolysinIII-like protein		PF07690	A0A5B9D1N5	Bartonella krasnovii	MFS transporter
					PF03006	A0A286TCX1	Bifidobacterium bifidum LMG 13195.	Hly-III family protein		PF07690	E6YHK5	Bartonella clarridgeiae (strain CCUG 45776 / CIP 104772 / 73)	Transport transmembrane protein
					PF03006	E4VB53	Bifidobacterium bifidum NCIMB 41171.	Channel protein_x000D_ hemolysin III family		PF07690	J1J0J7	Bartonella washoeensis Sb944nv	Major facilitator superfamily (MFS) profile domain-containing protein
					PF03006	E4V911	Bifidobacterium bifidum NCIMB 41171.	Channel protein_x000D_ hemolysin III family		PF07690	J0Q4S5	Bartonella birtlesii LL-WM9	Major facilitator superfamily (MFS) profile domain-containing protein
					PF03006	A0A7J5TMS0	Bifidobacterium bifidum.	Hemolysin III family protein		PF07690	A0A336NA56	Bartonella grahamii	Inner membrane transport protein ydhP
					PF03006	A0A6I0U7W6	Bifidobacterium bifidum.	Hemolysin III-like membrane protein		PF07690	A0A9Q9DMU1	Bartonella taylorii	MFS transporter
					PF03006	A0A133KN20	Bifidobacterium bifidum.	Hemolysin III family protein		PF07690	A0A5M8P8C4	Candidatus Tokpelaia sp	MFS transporter
					PF03006	A0A836P9K7	Bifidobacterium bifidum.	Putative hemolysin III-like membrane protein		PF07690	A0A1U9JUN6	Candidatus Tokpelaia hoelldoblerii	Major facilitator superfamily protein
					PF03006	A0A292G6W9	Bifidobacterium bifidum.	Hly-III family protein		PF07690	A0A3P1URL8	Brucellaceae bacterium VT-16-1752	MFS transporter
					PF03006	A0A2U0BW18	Bifidobacterium bifidum.	Hemolysin III		PF07690	A0A256G2R1	Brucella pseudogrignonensis	MFS transporter
					PF03006	A0A0H2PM33	Bifidobacterium bifidum.	Hemolysin III-like membrane protein		PF07690	A0A9Q8MMI5	[Ochrobactrum] teleogrylli	MFS transporter
					PF03006	A0A7J5TPR5	Bifidobacterium bifidum.	Hemolysin III family protein		PF07690	A0A849KJ18	[Ochrobactrum] soli	MFS transporter
					PF03006	A0A9X4NK50	Bifidobacterium bifidum.	Hemolysin III family protein		PF07690	A0A256GBP6	Brucella lupini	Major facilitator superfamily (MFS) profile domain-containing protein
					PF03006	A0A0M4LZN9	Bifidobacterium bifidum.	Hemolysin III family membrane protein		PF07690	A0A256FQ19	Brucella grignonensis	Major facilitator superfamily (MFS) profile domain-containing protein
					PF03006	A0A1I1FT55	Bifidobacterium bifidum.	Hemolysin III		PF07690	A0A6I0DMT2	Brucella anthropi (Ochrobactrum anthropi)	MFS transporter
					PF03006	A0A133KRC3	Bifidobacterium bifidum.	Hemolysin III		PF07690	A0A011TKU4	Brucella anthropi (Ochrobactrum anthropi)	MFS transporter
					PF03006	A0A292G074	Bifidobacterium bifidum.	Hemolysin III		PF07690	A0A6I0D262	Brucella anthropi (Ochrobactrum anthropi)	MFS transporter
					PF03006	A0A0E2ZD18	Bifidobacterium bifidum.	HemolysinIII-like protein		PF07690	A0A2N3M117	Pleomorphomonas diazotrophica	MFS transporter
					PF03006	A0A415C6V7	Bifidobacterium bifidum.	Hemolysin III family protein		PF07690	A0A1E3H1D6	Methylobrevis pamukkalensis	Inner membrane transport protein YdhP
					PF03006	A0A086ZG09	Bifidobacterium bohemicum DSM 22767.	Hemolysin III-like membrane protein		PF07690	A0A4Q2U913	Lichenibacterium minor	MFS transporter
					PF03006	A0A080N1Z6	Bifidobacterium bombi DSM 19703.	Hemolysin III-like membrane protein		PF07690	A0A974TVQ8	Sinorhizobium sp. BG8	MFS transporter
					PF03006	A0A086ZP21	Bifidobacterium boum.	Hemolysin III-like membrane protein		PF07690	A0A143ZC31	Rhizobium sp. 9140	MFS transporter, DHA1 family, arabinose polymer transporter
					PF03006	A0A848D4F0	Bifidobacterium boum.	Hemolysin III family protein		PF07690	A0A1Q9ASN1	Xaviernesmea oryzae	MFS transporter
					PF03006	D4BLN1	Bifidobacterium breve DSM 20213 = JCM 1192.	Channel protein_x000D_ hemolysin III family		PF07690	A0A1Q9AEF4	Xaviernesmea rhizosphaerae	MFS transporter
					PF03006	D4BNN3	Bifidobacterium breve DSM 20213 = JCM 1192.	Channel protein_x000D_ hemolysin III family		PF07690	A0A9X1NQS3	Rhizobium quercicola	MFS transporter
					PF03006	S2ZCY4	Bifidobacterium breve HPH0326.	Hemolysin III family channel protein		PF07690	A0A657LMZ5	Pararhizobium antarcticum	MFS transporter
					PF03006	S3A2G0	Bifidobacterium breve HPH0326.	Hemolysin III family channel protein		PF07690	A0A1H9SZY8	Rhizobium sp. NFR03	MFS transporter, DHA1 family, arabinose polymer transporter
					PF03006	W6EW37	Bifidobacterium breve JCM 7019.	Hemolysin-III-like protein		PF07690	A0A484QRV3	plant metagenome	Major facilitator superfamily (MFS) profile domain-containing protein
					PF03006	W6EW10	Bifidobacterium breve JCM 7019.	Hemolysin-III-like protein		PF07690	A0A484R628	plant metagenome	Major facilitator superfamily (MFS) profile domain-containing protein
					PF03006	A0A0L7D3J7	Bifidobacterium breve MCC 1114.	Hemolysin III		PF07690	A0A484UGB3	plant metagenome	Major facilitator superfamily (MFS) profile domain-containing protein
					PF03006	A0A0L7CUS9	Bifidobacterium breve MCC 1114.	Hemolysin III		PF07690	A0A484P412	plant metagenome	Major facilitator superfamily (MFS) profile domain-containing protein
					PF03006	A0A0L7AV65	Bifidobacterium breve MCC 1128.	Hemolysin III		PF07690	A0A484UTX7	plant metagenome	Major facilitator superfamily (MFS) profile domain-containing protein
					PF03006	A0A0L7B655	Bifidobacterium breve MCC 1128.	Hemolysin III		PF07690	A0A484PT54	plant metagenome	Major facilitator superfamily (MFS) profile domain-containing protein
					PF03006	A0A0L7BLH7	Bifidobacterium breve MCC 1340.	Hemolysin III		PF07690	A0A484PUT4	plant metagenome	Major facilitator superfamily (MFS) profile domain-containing protein
					PF03006	A0A0L7BWQ6	Bifidobacterium breve MCC 1340.	Hemolysin III
					PF03006	A0A0L7C6V6	Bifidobacterium breve MCC 1454.	Hemolysin III
					PF03006	A0A0L7CC71	Bifidobacterium breve MCC 1454.	Hemolysin III
					PF03006	A0A9Q2X944	Bifidobacterium breve.	Hemolysin III family protein
					PF03006	A0A3G8W463	Bifidobacterium breve.	Hemolysin III family protein
					PF03006	A0A9Q4K5T4	Bifidobacterium breve.	Hemolysin III family protein
					PF03006	A0A564RNG0	Bifidobacterium breve.	Haemolysin-III related
					PF03006	A0A2K9AKI3	Bifidobacterium breve.	Hemolysin-III-like protein
					PF03006	A0A564RQI4	Bifidobacterium breve.	Haemolysin-III related
					PF03006	A0A0L0LT71	Bifidobacterium breve.	Hemolysin III
					PF03006	A0A2K9C1Y1	Bifidobacterium breve.	Putative membrane spanning protein
					PF03006	A0A3G8WME8	Bifidobacterium breve.	Hemolysin III family protein
					PF03006	A0A564W1Z8	Bifidobacterium breve.	Haemolysin-III related
					PF03006	A0A2K9B266	Bifidobacterium breve.	Hemolysin-III-like protein
					PF03006	A0A3D8UGA4	Bifidobacterium breve.	Hemolysin III
					PF03006	A0A9Q2X4H3	Bifidobacterium breve.	Hemolysin III family protein
					PF03006	A0A2N6TW85	Bifidobacterium breve.	Hemolysin III family protein
					PF03006	A0A133L085	Bifidobacterium breve.	Hemolysin III
					PF03006	A0A8U0KHQ6	Bifidobacterium breve.	Haemolysin-III related
					PF03006	A0A2K9AX39	Bifidobacterium breve.	Putative membrane spanning protein
					PF03006	A0A5Q0LVJ0	Bifidobacterium breve.	Hemolysin III family protein
					PF03006	A0A3D8UFY5	Bifidobacterium breve.	Hemolysin III
					PF03006	A0A6N2SI06	Bifidobacterium breve.	Haemolysin-III related
					PF03006	A0A2K9AMP5	Bifidobacterium breve.	Putative membrane spanning protein
					PF03006	A0A9Q4K261	Bifidobacterium breve.	Hemolysin III family protein
					PF03006	A0A9Q4K9C7	Bifidobacterium breve.	Hemolysin III family protein
					PF03006	A0A2K9BG28	Bifidobacterium breve.	Hemolysin-III-like protein
					PF03006	A0A5P9RMB3	Bifidobacterium breve.	Hemolysin III family protein
					PF03006	A0A2K9BCJ6	Bifidobacterium breve.	Hemolysin-III-like protein
					PF03006	A0A9Q4K459	Bifidobacterium breve.	Hemolysin III family protein
					PF03006	A0A0L0LW48	Bifidobacterium breve.	Hemolysin-III-like protein
					PF03006	A0A2N6TUW4	Bifidobacterium breve.	Hemolysin III
					PF03006	A0A2K9BEM0	Bifidobacterium breve.	Hemolysin-III-like protein
					PF03006	A0A2K9BD36	Bifidobacterium breve.	Hemolysin-III-like protein
					PF03006	A0A0M3T8W5	Bifidobacterium breve.	Hemolysin III family protein
					PF03006	A0A8U0K2Y2	Bifidobacterium breve.	Haemolysin-III related
					PF03006	A0A2K9BBZ2	Bifidobacterium breve.	Hemolysin-III-like protein
					PF03006	A0A133L1N1	Bifidobacterium breve.	Putative membrane spanning protein
					PF03006	A0A0M4M214	Bifidobacterium breve.	Hemolysin III family protein
					PF03006	A0A2K9B8Q2	Bifidobacterium breve.	Haemolysin-III related
					PF03006	A0A2K9AYE6	Bifidobacterium breve.	Hemolysin III family protein
					PF03006	A0A430FID7	Bifidobacterium callimiconis.	Hemolysin III family channel protein
					PF03006	A0A2U2N868	Bifidobacterium callitrichidarum.	Hemolysin III
					PF03006	A0A087A9V4	Bifidobacterium callitrichos DSM 23973.	Hly-III family protein
					PF03006	A0A2T3GDI5	Bifidobacterium callitrichos.	Hemolysin III
					PF03006	A0A2T3GIR6	Bifidobacterium callitrichos.	Hemolysin III
					PF03006	A0A5M9ZB55	Bifidobacterium callitrichos.	Hemolysin III family protein
					PF03006	A0A7K1J3A5	Bifidobacterium canis.	Hemolysin III
					PF03006	A0A7K1J3L6	Bifidobacterium canis.	Hemolysin III
					PF03006	A0A430F9V2	Bifidobacterium castoris.	Hemolysin III
					PF03006	B6XU13	Bifidobacterium catenulatum DSM 16992 = JCM 1194 = LMG 11043.	Channel protein_x000D_ hemolysin III family
					PF03006	A0A087B6J7	Bifidobacterium catenulatum subsp. kashiwanohense JCM 15439 = DSM 21854.	Hemolysin-III related protein
					PF03006	A0A6B8LMN4	Bifidobacterium catenulatum subsp. kashiwanohense.	Hemolysin III
					PF03006	A0A1V8PPW6	Bifidobacterium catenulatum.	Hemolysin III
					PF03006	A0A564VJM2	Bifidobacterium catenulatum.	Haemolysin-III related
					PF03006	A0A6L4V4D3	Bifidobacterium catenulatum.	Hemolysin III family protein
					PF03006	A0A2U2MVH9	Bifidobacterium catulorum.	Hemolysin III
					PF03006	A0A6I1GA93	Bifidobacterium cebidarum.	Hemolysin III
					PF03006	A0A087AGT0	Bifidobacterium choerinum.	Hemolysin III
					PF03006	A0A087A5X4	Bifidobacterium choerinum.	Hemolysin III
					PF03006	A0A2D3D8U8	Bifidobacterium choerinum.	Hemolysin III
					PF03006	A0A6I5N9Y9	Bifidobacterium choloepi.	Hemolysin III family protein
					PF03006	A0A6I5NBU9	Bifidobacterium choloepi.	Hemolysin III family protein
					PF03006	A0A076JJS4	Bifidobacterium coryneforme.	Hemolysin III-like membrane protein
					PF03006	A0A2A2EEB5	Bifidobacterium criceti.	Hemolysin III
					PF03006	A0A971IDE0	Bifidobacterium crudilactis.	Hemolysin III family protein
					PF03006	A0A971CZH7	Bifidobacterium crudilactis.	Hemolysin III family protein
					PF03006	A0A087AND2	Bifidobacterium cuniculi.	Putative hemolysin III-like membrane protein
					PF03006	A0A087B455	Bifidobacterium cuniculi.	Hemolysin III family protein
					PF03006	D2Q9P7	Bifidobacterium dentium (strain ATCC 27534 / DSM 20436 / JCM 1195 / Bd1)	Hemolysin-III related protein
					PF03006	E0Q7A0	Bifidobacterium dentium ATCC 27679.	Channel protein_x000D_ hemolysin III family
					PF03006	A0A6N2RXZ8	Bifidobacterium dentium.	Haemolysin-III related
					PF03006	A0A430FSJ9	Bifidobacterium dolichotidis.	Hemolysin III
					PF03006	A0A430FP01	Bifidobacterium dolichotidis.	Hemolysin III
					PF03006	A0A261GC07	Bifidobacterium eulemuris.	Hemolysin III
					PF03006	A0A2M9HL73	Bifidobacterium felsineum.	Hemolysin III
					PF03006	D1NWC5	Bifidobacterium gallicum DSM 20093 = LMG 11596.	Hemolysin III
					PF03006	D1NWS3	Bifidobacterium gallicum DSM 20093 = LMG 11596.	Hemolysin III
					PF03006	A0A430FMF8	Bifidobacterium goeldii.	Hemolysin III
					PF03006	A0A430FL88	Bifidobacterium goeldii.	Hemolysin III
					PF03006	A0A261FXY0	Bifidobacterium hapali.	Hemolysin III
					PF03006	A0A2N5IUG2	Bifidobacterium imperatoris.	Hemolysin III
					PF03006	A0A087VUR0	Bifidobacterium indicum LMG 11587 = DSM 20214.	Hemolysin III-like membrane protein
					PF03006	A0A318LZ60	Bifidobacterium indicum.	Hemolysin III
					PF03006	A0A2A2ED06	Bifidobacterium italicum.	Hemolysin III
					PF03006	A0A5N5RM92	Bifidobacterium jacchi.	Hemolysin III family protein
					PF03006	A0A0A7I384	Bifidobacterium kashiwanohense PV20-2.	Hemolysin III
					PF03006	A0A261FVQ5	Bifidobacterium lemurum.	Hemolysin III
					PF03006	A0A261FTB2	Bifidobacterium lemurum.	Hemolysin III
					PF03006	A0A6I1GHB2	Bifidobacterium leontopitheci.	Hemolysin III
					PF03006	A0A6I1GTI5	Bifidobacterium leontopitheci.	Hemolysin III
					PF03006	B3DNU1	Bifidobacterium longum (strain DJO10A)	Putative hemolysin III-like membrane protein
					PF03006	B3DSU4	Bifidobacterium longum (strain DJO10A)	Hypothetical hemolysin III-like membrane protein
					PF03006	Q8G6S8	Bifidobacterium longum (strain NCC 2705)	Hemolysin III
					PF03006	Q8G5J6	Bifidobacterium longum (strain NCC 2705)	Hemolysin III
					PF03006	R5NEK9	Bifidobacterium longum CAG:69.	Hemolysin III
					PF03006	V6XV87	Bifidobacterium longum E18.	Membrane-anchored hemolysin III-like protein
					PF03006	E8MWR5	Bifidobacterium longum subsp. infantis (strain 157F)	Hemolysin III
					PF03006	E8MSM0	Bifidobacterium longum subsp. infantis (strain 157F)	Hemolysin III
					PF03006	B7GTE1	Bifidobacterium longum subsp. infantis (strain ATCC 15697 / DSM 20088 / JCM1222 / NCTC 11817 / S12)	Hly-III family protein
					PF03006	B7GSP6	Bifidobacterium longum subsp. infantis (strain ATCC 15697 / DSM 20088 / JCM1222 / NCTC 11817 / S12)	Hly-III family protein
					PF03006	C5E9Z2	Bifidobacterium longum subsp. infantis CCUG 52486.	Hemolysin III
					PF03006	A0A8U0L369	Bifidobacterium longum subsp. infantis.	Haemolysin-III related
					PF03006	A0A7L9TU73	Bifidobacterium longum subsp. infantis.	Hemolysin III family protein
					PF03006	A0A7L9TN75	Bifidobacterium longum subsp. infantis.	Hemolysin III family protein
					PF03006	A0A1S2VX79	Bifidobacterium longum subsp. infantis.	Hemolysin III
					PF03006	A0A8U0KTQ8	Bifidobacterium longum subsp. infantis.	Haemolysin-III related
					PF03006	A0A564RYP2	Bifidobacterium longum subsp. infantis.	Haemolysin-III related
					PF03006	A0A4S5BIE6	Bifidobacterium longum subsp. infantis.	Hemolysin III family protein
					PF03006	A0A0M4LTJ4	Bifidobacterium longum subsp. infantis.	Hly-III family protein
					PF03006	A0A7D4Y2C1	Bifidobacterium longum subsp. infantis.	Hemolysin III family protein
					PF03006	A0A564VP01	Bifidobacterium longum subsp. infantis.	Haemolysin-III related
					PF03006	A0A7D5C3L7	Bifidobacterium longum subsp. infantis.	Hemolysin III family protein
					PF03006	A0A1S2VUN1	Bifidobacterium longum subsp. infantis.	Hemolysin III
					PF03006	A0A0M5KVP9	Bifidobacterium longum subsp. infantis.	Hly-III family protein
					PF03006	A0A4S5BHR3	Bifidobacterium longum subsp. infantis.	Hemolysin III family protein
					PF03006	A0A7L9TPV0	Bifidobacterium longum subsp. infantis.	Hemolysin III family protein
					PF03006	A0A564S3S9	Bifidobacterium longum subsp. infantis.	Hemolysin III
					PF03006	A0A7L9TT16	Bifidobacterium longum subsp. infantis.	Hemolysin III family protein
					PF03006	A0A564VXV7	Bifidobacterium longum subsp. infantis.	Haemolysin-III related
					PF03006	D6ZXC6	Bifidobacterium longum subsp. longum (strain JDM301)	Hly-III family protein
					PF03006	D6ZTF9	Bifidobacterium longum subsp. longum (strain JDM301)	Hly-III family protein
					PF03006	I3AXN8	Bifidobacterium longum subsp. longum 35B.	Putative membrane protein
					PF03006	I3B5K2	Bifidobacterium longum subsp. longum 35B.	Putative membrane protein
					PF03006	I3BCI8	Bifidobacterium longum subsp. longum 44B.	Putative membrane protein
					PF03006	A0A836NGS2	Bifidobacterium longum subsp. longum 72B.	Hemolysin III
					PF03006	A0A836NL60	Bifidobacterium longum subsp. longum 72B.	Hemolysin III
					PF03006	C2GUA7	Bifidobacterium longum subsp. longum ATCC 55813.	Hemolysin III
					PF03006	C2GXT7	Bifidobacterium longum subsp. longum ATCC 55813.	Hemolysin III
					PF03006	T2I0X3	Bifidobacterium longum subsp. longum CECT 7347.	Haemolysin-III related family protein
					PF03006	T2HYU0	Bifidobacterium longum subsp. longum CECT 7347.	Haemolysin-III related family protein
					PF03006	A0A083XVP1	Bifidobacterium longum subsp. longum EK13.	Hemolysin III
					PF03006	D6D989	Bifidobacterium longum subsp. longum F8.	Predicted membrane protein_x000D_ hemolysin III homolog
					PF03006	D6DAT2	Bifidobacterium longum subsp. longum F8.	Predicted membrane protein_x000D_ hemolysin III homolog
					PF03006	A0A0A0U9U8	Bifidobacterium longum subsp. longum GT15.	Hemolysin III
					PF03006	A0A0A0UE06	Bifidobacterium longum subsp. longum GT15.	Hemolysin III
					PF03006	F8AUK1	Bifidobacterium longum subsp. longum KACC 91563.	Hemolysin III
					PF03006	F8ARE4	Bifidobacterium longum subsp. longum KACC 91563.	Hemolysin III
					PF03006	A0A7L9UMJ8	Bifidobacterium longum subsp. longum.	Hemolysin III family protein
					PF03006	A0A4V2N6L6	Bifidobacterium longum subsp. longum.	Putative membrane spanning protein
					PF03006	A0A0S2MG01	Bifidobacterium longum subsp. longum.	Hemolysin III family membrane protein
					PF03006	A0A8A3MZW0	Bifidobacterium longum subsp. longum.	Hemolysin III family protein
					PF03006	A0A0M0VM60	Bifidobacterium longum subsp. longum.	Haemolysin-III related
					PF03006	A0A4V2NDN6	Bifidobacterium longum subsp. longum.	Hemolysin III
					PF03006	A0A4R0V0F8	Bifidobacterium longum subsp. longum.	Putative membrane spanning protein
					PF03006	A0A9Q8QY36	Bifidobacterium longum subsp. longum.	Hemolysin III family protein
					PF03006	A0A4R0VA18	Bifidobacterium longum subsp. longum.	Hemolysin III
					PF03006	A0A7L9UJF3	Bifidobacterium longum subsp. longum.	Hemolysin III family protein
					PF03006	A0A4R0TGQ2	Bifidobacterium longum subsp. longum.	Putative membrane spanning protein
					PF03006	A0A4R0SX94	Bifidobacterium longum subsp. longum.	Putative membrane spanning protein
					PF03006	A0A4R0U330	Bifidobacterium longum subsp. longum.	Putative membrane spanning protein
					PF03006	A0A4V2N0B9	Bifidobacterium longum subsp. longum.	Putative membrane spanning protein
					PF03006	A0A9Q8QXX5	Bifidobacterium longum subsp. longum.	Hemolysin III family protein
					PF03006	A0A0S2MC40	Bifidobacterium longum subsp. longum.	Hemolysin III
					PF03006	A0A837TTI2	Bifidobacterium longum subsp. longum.	Hemolysin III
					PF03006	A0A4R0VY94	Bifidobacterium longum subsp. longum.	Putative membrane spanning protein
					PF03006	A0A4R0WNN6	Bifidobacterium longum subsp. longum.	Putative membrane spanning protein
					PF03006	A0A0A6VQZ3	Bifidobacterium longum subsp. longum.	Hemolysin III
					PF03006	A0A1S2VWP0	Bifidobacterium longum subsp. suis.	Hemolysin III
					PF03006	A0A087B5F1	Bifidobacterium longum subsp. suis.	Putative membrane protein
					PF03006	A0A087BFM4	Bifidobacterium longum subsp. suis.	Hly-III family protein
					PF03006	A0A1S2W2F3	Bifidobacterium longum subsp. suis.	Hemolysin III
					PF03006	A0A3D8U0X6	Bifidobacterium longum.	Hemolysin III
					PF03006	A0A2N0TLY4	Bifidobacterium longum.	Hemolysin III
					PF03006	A0A395Y391	Bifidobacterium longum.	Hemolysin III family protein
					PF03006	A0A2N0T4B3	Bifidobacterium longum.	Hemolysin III
					PF03006	A0A414F851	Bifidobacterium longum.	Hemolysin III family protein
					PF03006	A0A2N0SSK1	Bifidobacterium longum.	Hemolysin III
					PF03006	A0A1V8QH16	Bifidobacterium longum.	Hly-III family protein
					PF03006	A0A0A1GSF8	Bifidobacterium longum.	Hemolysin III family channel protein
					PF03006	A0A2I1J158	Bifidobacterium longum.	Hemolysin III
					PF03006	A0A3D8U243	Bifidobacterium longum.	Hemolysin III
					PF03006	A0A2U2RTB7	Bifidobacterium longum.	Hemolysin III
					PF03006	A0A6N2U5T3	Bifidobacterium longum.	Haemolysin-III related
					PF03006	A0A1V8RFT9	Bifidobacterium longum.	Hemolysin III
					PF03006	A0A395XVH5	Bifidobacterium longum.	Hemolysin III family protein
					PF03006	A0A1V8RGY4	Bifidobacterium longum.	Hemolysin III
					PF03006	A0A0M3TJA6	Bifidobacterium longum.	Hemolysin III family protein
					PF03006	A0A151C6E5	Bifidobacterium longum.	Hemolysin III family protein
					PF03006	A0A7U4KD71	Bifidobacterium longum.	Hemolysin III
					PF03006	A0A2N0SY05	Bifidobacterium longum.	Hemolysin III
					PF03006	A0A833MQ49	Bifidobacterium longum.	Hemolysin III family protein
					PF03006	A0A2I1J336	Bifidobacterium longum.	Hemolysin III
					PF03006	A0A2U2RU54	Bifidobacterium longum.	Hemolysin III
					PF03006	A0A2N0TKA2	Bifidobacterium longum.	Hemolysin III
					PF03006	A0A3D8U6F2	Bifidobacterium longum.	Hemolysin III
					PF03006	A0A087B7Y8	Bifidobacterium magnum.	Hemolysin-III-like protein
					PF03006	A0A087BCH6	Bifidobacterium magnum.	HemolysinIII-like protein
					PF03006	A0A2N5J996	Bifidobacterium margollesii.	Hemolysin III
					PF03006	A0A087BKT8	Bifidobacterium merycicum.	Hemolysin III-like membrane protein
					PF03006	A0A087BQH1	Bifidobacterium minimum.	HemolysinIII-like protein
					PF03006	A0A087CAL2	Bifidobacterium mongoliense DSM 21395.	Hemolysin III
					PF03006	A0A087C4P2	Bifidobacterium mongoliense DSM 21395.	Hemolysin III
					PF03006	A0A423UGC5	Bifidobacterium mongoliense.	Hemolysin III
					PF03006	A0A423UEY0	Bifidobacterium mongoliense.	Hemolysin III
					PF03006	W4N8I7	Bifidobacterium moukalabense DSM 27321.	Hemolysin-III related protein
					PF03006	A0A261FIU9	Bifidobacterium myosotis.	Hemolysin III
					PF03006	A0A261FKF0	Bifidobacterium myosotis.	Hemolysin III
					PF03006	A0A5M9ZNL7	Bifidobacterium myosotis.	Hemolysin III family protein
					PF03006	A0A2N5J5I0	Bifidobacterium parmae.	Hemolysin III
					PF03006	A0A6L9ST32	Bifidobacterium platyrrhinorum.	Hemolysin III family protein
					PF03006	A0A2M9H8F6	Bifidobacterium primatium.	Hemolysin III
					PF03006	R6P9S4	Bifidobacterium pseudocatenulatum CAG:263.	Hemolysin III
					PF03006	C0BST7	Bifidobacterium pseudocatenulatum DSM 20438 = JCM 1200 = LMG 10505.	Channel protein_x000D_ hemolysin III family
					PF03006	A0A072MT22	Bifidobacterium pseudocatenulatum IPLA36007.	Hemolysin III
					PF03006	A0A413CA56	Bifidobacterium pseudocatenulatum.	Hemolysin III
					PF03006	A0A3E5AWT8	Bifidobacterium pseudocatenulatum.	Hemolysin III family protein
					PF03006	A0A413KEC5	Bifidobacterium pseudocatenulatum.	Hemolysin III family protein
					PF03006	A0A173YD44	Bifidobacterium pseudocatenulatum.	Hemolysin III family protein
					PF03006	A0A3E5HNQ4	Bifidobacterium pseudocatenulatum.	Hemolysin III family protein
					PF03006	A0A9X5B9I2	Bifidobacterium pseudocatenulatum.	Hemolysin III family protein
					PF03006	A0A267WMV9	Bifidobacterium pseudocatenulatum.	Hemolysin III
					PF03006	A0A0A7ICD9	Bifidobacterium pseudolongum PV8-2.	Hemolysin III
					PF03006	A0A0A7I686	Bifidobacterium pseudolongum PV8-2.	Hemolysin III
					PF03006	A0A921ERC5	Bifidobacterium pseudolongum subsp. globosum.	Hemolysin III family protein
					PF03006	A0A2N3QXC6	Bifidobacterium pseudolongum subsp. globosum.	Hemolysin III-like protein
					PF03006	A0A4Q5AIH8	Bifidobacterium pseudolongum subsp. globosum.	Hemolysin III
					PF03006	A0A4Q5AM02	Bifidobacterium pseudolongum subsp. globosum.	Hemolysin III
					PF03006	A0A4V1Y7G9	Bifidobacterium pseudolongum subsp. globosum.	Hemolysin III
					PF03006	A0A8B3RM16	Bifidobacterium pseudolongum subsp. globosum.	Hemolysin III
					PF03006	A0A2N3R637	Bifidobacterium pseudolongum subsp. globosum.	Hemolysin III-like protein
					PF03006	A0A2N3QLB5	Bifidobacterium pseudolongum subsp. globosum.	Hemolysin III-like protein
					PF03006	A0A4Q5AT88	Bifidobacterium pseudolongum subsp. globosum.	Hemolysin III
					PF03006	A0A2N3QJB5	Bifidobacterium pseudolongum subsp. globosum.	Hemolysin III
					PF03006	A0A4Q5AIN5	Bifidobacterium pseudolongum subsp. globosum.	Hemolysin III
					PF03006	A0A4Q5A0P8	Bifidobacterium pseudolongum subsp. globosum.	Hemolysin III
					PF03006	A0A4Q5A0K8	Bifidobacterium pseudolongum subsp. globosum.	Hemolysin III
					PF03006	A0A4Q5A4V9	Bifidobacterium pseudolongum subsp. globosum.	Hemolysin III
					PF03006	A0A4Q5A307	Bifidobacterium pseudolongum subsp. globosum.	Hemolysin III
					PF03006	A0A4Q5AHW6	Bifidobacterium pseudolongum subsp. globosum.	Hemolysin III
					PF03006	A0A2N3QPN5	Bifidobacterium pseudolongum subsp. globosum.	Hemolysin III
					PF03006	A0A4Q5B8Z1	Bifidobacterium pseudolongum subsp. globosum.	Hemolysin III
					PF03006	A0A4Q5BBF2	Bifidobacterium pseudolongum subsp. globosum.	Hemolysin III
					PF03006	A0A2N3QRS0	Bifidobacterium pseudolongum subsp. globosum.	Hemolysin III
					PF03006	A0A4Q5AER1	Bifidobacterium pseudolongum subsp. globosum.	Hemolysin III
					PF03006	A0A8B3RMA3	Bifidobacterium pseudolongum subsp. globosum.	Hemolysin III-like protein
					PF03006	A0A4V1Y599	Bifidobacterium pseudolongum subsp. globosum.	Hemolysin III
					PF03006	A0A2N3QTY7	Bifidobacterium pseudolongum subsp. globosum.	Hemolysin III
					PF03006	A0A2N3R4M6	Bifidobacterium pseudolongum subsp. globosum.	Hemolysin III
					PF03006	A0A4V1Y307	Bifidobacterium pseudolongum subsp. pseudolongum.	Hemolysin III
					PF03006	A0A4Q5A8Q8	Bifidobacterium pseudolongum subsp. pseudolongum.	Hemolysin III
					PF03006	A0A395XI16	Bifidobacterium pseudolongum.	Hemolysin III family protein
					PF03006	A0A248X4Y7	Bifidobacterium pseudolongum.	Hemolysin-III related family protein
					PF03006	A0A4S4FCU8	Bifidobacterium pseudolongum.	Hemolysin III family protein
					PF03006	A0A395XC26	Bifidobacterium pseudolongum.	Hemolysin III family protein
					PF03006	A0A248X6S1	Bifidobacterium pseudolongum.	Hemolysin-III related family protein
					PF03006	A0A3A9AK98	Bifidobacterium pseudolongum.	Hemolysin III family protein
					PF03006	A0A845QR28	Bifidobacterium pseudolongum.	Hemolysin III family protein
					PF03006	A0A087CDG9	Bifidobacterium psychraerophilum.	Hemolysin III family protein
					PF03006	A0A087CHN3	Bifidobacterium psychraerophilum.	Hemolysin III-like membrane protein
					PF03006	A0A921IZJ7	Bifidobacterium pullorum subsp. gallinarum.	Hemolysin III family protein
					PF03006	A0A4P6DTD9	Bifidobacterium pullorum subsp. gallinarum.	Hemolysin III family protein
					PF03006	A0A087AQN0	Bifidobacterium pullorum subsp. gallinarum.	HemolysinIII-like protein
					PF03006	A0A087CWR8	Bifidobacterium pullorum subsp. saeculare DSM 6531 = LMG 14934.	HemolysinIII-like protein
					PF03006	A0A939B935	Bifidobacterium pullorum subsp. saeculare.	Hemolysin III family protein
					PF03006	A0A938WXM8	Bifidobacterium pullorum subsp. saeculare.	Hemolysin III family protein
					PF03006	A0A7V8HSM0	Bifidobacterium pullorum.	HemolysinIII-like protein
					PF03006	A0A6L4X1K8	Bifidobacterium ramosum.	Hemolysin III
					PF03006	A0A087CRI6	Bifidobacterium reuteri DSM 23975.	Hemolysin III-like membrane protein
					PF03006	A0A087CXS1	Bifidobacterium reuteri DSM 23975.	Putative membrane protein
					PF03006	A0A5J5EAH1	Bifidobacterium reuteri.	Hemolysin III family protein
					PF03006	A0A5J5E9W2	Bifidobacterium reuteri.	Hemolysin III family protein
					PF03006	A0A087D298	Bifidobacterium ruminantium.	HemolysinIII-like protein
					PF03006	A0A087DC89	Bifidobacterium saguini DSM 23967.	Putative membrane protein
					PF03006	A0A430FUJ3	Bifidobacterium samirii.	Hemolysin III
					PF03006	A0A2M9HRY2	Bifidobacterium scaligerum.	Hemolysin III
					PF03006	A0A087DDT4	Bifidobacterium scardovii.	Hly-III family protein
					PF03006	A0A087DHW9	Bifidobacterium scardovii.	Hemolysin III
					PF03006	A0A2M9HDV9	Bifidobacterium simiarum.	Hemolysin III
					PF03006	A0A3C0U8L1	Bifidobacterium sp.	Hemolysin III
					PF03006	A0A7X9BI52	Bifidobacterium sp.	Hemolysin III family protein
					PF03006	A0A3D1ZQA0	Bifidobacterium sp.	Hemolysin III
					PF03006	A0A3D1TK69	Bifidobacterium sp.	Hemolysin III
					PF03006	A0A7Y0ENL1	Bifidobacterium sp. DSM 109957.	Hemolysin III
					PF03006	A0A7Y0F016	Bifidobacterium sp. DSM 109958.	Hemolysin III
					PF03006	A0A7Y0HZN6	Bifidobacterium sp. DSM 109958.	Hemolysin III
					PF03006	A0A7Y0HVG8	Bifidobacterium sp. DSM 109959.	Hemolysin III
					PF03006	A0A7Y0EU19	Bifidobacterium sp. DSM 109960.	Hemolysin III
					PF03006	A0A9E7YS64	Bifidobacterium sp. FKU.	Hemolysin III family protein
					PF03006	A0A9E8C2I2	Bifidobacterium sp. FKU.	Hemolysin III family protein
					PF03006	W2VKC2	Bifidobacterium sp. MSTE12.	Putative membrane protein
					PF03006	A0A2G5Q343	Bifidobacterium sp. N4G05.	Hemolysin III
					PF03006	A0A2G5PV46	Bifidobacterium sp. N5G01.	Hemolysin III
					PF03006	A0A9E7YMV1	Bifidobacterium sp. SKU.	Hemolysin III family protein
					PF03006	A0A9E7YTU9	Bifidobacterium sp. SKU.	Hemolysin III family protein
					PF03006	A0A6L9TC27	Bifidobacterium sp. SMB2.	Hemolysin III family protein
					PF03006	A0A9E7YV82	Bifidobacterium sp. TKU.	Hemolysin III family protein
					PF03006	A0A9E8C985	Bifidobacterium sp. TKU.	Hemolysin III family protein
					PF03006	A0A6I2T0X3	Bifidobacterium sp. WCA-178-WT-4B.	Hemolysin III family protein
					PF03006	A0A6I2SZI2	Bifidobacterium sp. WCA-178-WT-4B.	Hemolysin III family protein
					PF03006	A0A421KZR9	Bifidobacterium sp. wkB344.	Hemolysin III
					PF03006	A0A087DZN8	Bifidobacterium stellenboschense.	Hemolysin III-like membrane protein
					PF03006	A0A087E9R5	Bifidobacterium subtile.	Hemolysin III
					PF03006	A0A087E858	Bifidobacterium subtile.	Hemolysin III
					PF03006	A0A087E492	Bifidobacterium thermacidophilum subsp. thermacidophilum.	Hly-III family protein
					PF03006	M4REY6	Bifidobacterium thermophilum RBL67.	Hemolysin III
					PF03006	A0A7X9RN81	Bifidobacterium thermophilum.	Hemolysin III family protein
					PF03006	A0A2N3QKH9	Bifidobacterium thermophilum.	HemolysinIII-like protein
					PF03006	A0A5N6S8Y2	Bifidobacterium tibiigranuli.	Hemolysin III family protein
					PF03006	A0A5M9ZU85	Bifidobacterium tissieri.	Hemolysin III family protein
					PF03006	A0A261FFM7	Bifidobacterium tissieri.	Hemolysin III family channel protein
					PF03006	A0A087EFF6	Bifidobacterium tsurumiense.	Hemolysin III-like membrane protein
					PF03006	A0A6L5WXW8	Bifidobacterium tsurumiense.	Hemolysin III family protein
					PF03006	A0A229VUR0	Bifidobacterium vansinderenii.	Hemolysin III family channel protein
					PF03006	A0A5J5DY40	Bifidobacterium vespertilionis.	Hemolysin III family protein
					PF03006	A0A5J5DTH3	Bifidobacterium vespertilionis.	Hemolysin III family protein
					PF03006	A0A366KGC6	Bifidobacterium xylocopae.	Hemolysin III
					PF03006	A0A261ET45	Bombiscardovia coagulans.	Hemolysin III
					PF03006	A0A8J3EY02	Galliscardovia ingluviei.	Hemolysin III
					PF03006	E6K1H9	Parascardovia denticolens DSM 10105 = JCM 12538.	Channel protein_x000D_ hemolysin III family
					PF03006	I8APG6	Parascardovia denticolens IPLA 20019.	Hly-III family protein
					PF03006	A0A261EV53	Pseudoscardovia radai.	Hemolysin III
					PF03006	A0A261EVY5	Pseudoscardovia radai.	Hemolysin III family channel protein
					PF03006	A0A261F4T5	Pseudoscardovia suis.	Hemolysin III
					PF03006	A0A261EYJ8	Pseudoscardovia suis.	Hemolysin III family channel protein
					PF03006	W5IJE2	Scardovia inopinata F0304.	Hemolysin III family channel protein
					PF03006	J0D6F0	Scardovia wiggsiae F0424.	Hemolysin III family channel protein
					PF03006	A0A930Q121	Scardovia wiggsiae.	Hemolysin III family protein
					PF03006	A0A1L5KZJ8	uncultured bacterium.	HlyIII: channel protein_x000D_ hemolysin III
					PF03006	A0A1L5KY75	uncultured bacterium.	Haemolysin-III related
					PF03006	A0A1L5KZD2	uncultured bacterium.	Haemolysin-III related
					PF03006	A0A1L5L200	uncultured bacterium.	Haemolysin-III related
					PF03006	A0A1L5KUY3	uncultured bacterium.	Haemolysin-III related
					PF03006	A0A1L5KGV7	uncultured bacterium.	Haemolysin-III related
					PF03006	A0A1L5KIQ1	uncultured bacterium.	Haemolysin-III related
					PF03006	A0A1L5KF01	uncultured bacterium.	HlyIII: channel protein_x000D_ hemolysin III
					PF03006	A0A1L5KYB7	uncultured bacterium.	HlyIII: channel protein_x000D_ hemolysin III
					PF03006	A0A1L5KUL7	uncultured bacterium.	Haemolysin-III related

## Sheet: S5
Table S5. Transporter family for the common bases and derivatives collected from https://www.tcdb.org/.
Substrate Name	TCID	System Description	Pfam	Pfam short name	UniprotID	Note
guanine	2.A.1.2.25	The purine base/nucleoside (nucleosides: inosine, adenosine and guanosine; bases: hypoxanthine, adenine, guanine, 2-fluoroadenine) efflux pump, YdhL (PbuE) (Johansen et al., 2003; Nygaard and Saxild, 2005; Zakataeva et al., 2007; Sheremet et al. 2011).	PF07690	MFS_1	Q797E3
guanine	2.A.39.2.3	The hypoxanthine/adenine/guanine (purine) transporter, Fcy21 (Goudela et al., 2006)	PF02133	Transp_cyt_pur	Q708J7
guanine	2.A.39.3.11	Purine/uracil uptake porter of 599 aas and 12 TMSs, NCS1 or PLUTO. Nucleobase:proton symporter that facilitates the uptake of nucleobases in the cells. Can transport adenine, guanine and uracil (Witz et al. 2014). Contributes to uracil import into plastids for plastidic uracil salvage which is essential for plant growth and development (Witz et al. 2012).	PF02133	Transp_cyt_pur	Q9LZD0
guanine	2.A.39.3.12	NCS1 of 540 aas and 12 TMSs. Transports adenine, guanine, hypoxanthine, cytosine, and allantoin and competitively binds xanthine and uric acid. The closely related Zea mays NCS1 transports adenine, guanine, and cytosine and competitively binds, 5-fluorocytosine, hypoxanthine, xanthine, and uric acid. The differences in these NCS1 profiles are due to a limited number of amino acid differences (Rap…	PF02133	Transp_cyt_pur	V9SBV7
guanine	2.A.39.3.14	NCS1 of 528 aas and 12 TMSs. Transporter of adenine, guanine, uracil and allantoin (Schein et al. 2013).			A8J166	deleted
guanine	2.A.40.4.6	XanQ or PbuX, purine base uptake porter specific for xanthine and guanine. It is of 463 aas and 13 or 14 TMSs in a 5 + 3 or 4 +1 + 4 TMS arrangement (Tatsaki et al. 2021).	PF00860	Xan_ur_permease	Q7DDK5
guanine	2.A.40.6.7	Solute carrier family 23 member 2-like protein (SLC23.A.4) of 614 aas and 13 or 14 TMSs, SNBT1. Mutations allowed functional insertion into fungal membranes (Kourkoulou et al. 2019). It transports urate and purine nucleobases in a sodium ion-dependent process (Yamamoto et al. 2010; Yasujima et al. 2018).	PF00860	Xan_ur_permease	D2KX48
guanine	2.A.40.7.1	The purine (hypoxanthine/adenine/guanine) transporter, AzgA (Cecchetto et al., 2004). Topological modeling has revealed a potential substrate binding cavity, and residues important for transport activity have been identified (Krypotou et al. 2014).	PF00860	Xan_ur_permease	Q7Z8R3
guanine	2.A.40.7.5	Purine base permease, GhxP or YjcD. Transports purines such as guanine, hypoxanthine, and xanthine. Also transports mutagenic purines such as 6-N-hydroxylaminopurine (HAP), 2-amino-HAP (AHAP), 6-mercaptopurine, 6-thioguanine, 1-methylguanine, 8-azaguanine, 6-thioguanine and 2-aminopurine (Kozmin et al. 2013; Papakostas et al. 2013).	PF00860	Xan_ur_permease	P0AF52
guanine	2.A.57.2.5	High-affinity nucleobase transporter (transports adenine, hypoxanthine, xanthine, guanine, guanosine, allopurinol, and inosine) (Burchmore et al., 2003)	PF01733	Nucleoside_tran	Q86MB6
guanine	2.A.57.2.6	High affinity purine nucleobase (hypoxanthine, guanine, xanthine, adenine, allopurinol) transporter, NT3 (Ortiz et al., 2007)	PF01733	Nucleoside_tran	Q4QG33
guanine	2.A.7.14.4	Purine permease 2 (AtPUP2). PUP2 transports cytokinins (trans- and cis-zeatin, kinetin, benzyladenine, isopentenyladenine, and to a lesser extent trans-zeatin riboside)	PF16913	PUNUT	Q94GB1
guanine	3.A.1.204.1	Eye pigment precursor transporter, White. Part of a membrane-spanning permease system necessary for the transport of pigment precursors into pigment cells responsible for eye color. White dimerize with Brown for the transport of guanine. The Scarlet (TC# 3.A.1.204.17) and White complex transports a metabolic intermediate (such as 3-hydroxy kynurenine) from the cytoplasm into the pigment granules …	PF01061,PF19055,PF00005	ABC2_membrane,ABC2_membrane_7,ABC_tran	P10090
guanine	3.A.1.204.18	Brown. Part of a membrane-spanning permease system necessary for the transport of pigment precursors into pigment cells responsible for eye color. Brown and white (TC# 3.A.1.204.1) dimerize for the transport of guanine (Campbell and Nash 2001). Knockouts of brown in the noctuid moth, Helicoverpa armigera, show no phenotypic effects on viability or pigmentation (Khan et al. 2017).	PF01061,PF19055,PF00005	ABC2_membrane,ABC2_membrane_7,ABC_tran	P12428
adenine	2.A.1.2.25	The purine base/nucleoside (nucleosides: inosine, adenosine and guanosine; bases: hypoxanthine, adenine, guanine, 2-fluoroadenine) efflux pump, YdhL (PbuE) (Johansen et al., 2003; Nygaard and Saxild, 2005; Zakataeva et al., 2007; Sheremet et al. 2011).	PF07690	MFS_1	Q797E3
adenine	2.A.1.2.62	Putative MDR pump, YdhC or PunC. It has been reporte to export arabinose but not xylose (Koita and Rao 2012). However, it also takes up adenosine, adenine, deoxyadenosine, and other purine nucleosides and nucleobases such as inosine and guanosine as sole nitrogen sources. It also takes up various sulfonamides such as sulfathiazole, sulfadiazine and sulfamethoxazole. Expression of the punC gene is…	PF07690	MFS_1	P37597
adenine	2.A.29.1.10	Solute carrier family 25 (mitochondrial carrier; adenine nucleotide translocator), member 6. It is an ADP/ATP exchanger (Clémençon et al. 2013).	PF00153	Mito_carr	P12236
adenine	2.A.29.1.3	adenine nucleotide transporter, ANT, or ATP:ADP carrier AAC1 (one of three paralogues). Transports heme and heme precursor protoporphyrin IX (PP IX) as well as ATP and ADP (Azuma et al. 2008).	PF00153	Mito_carr	P04710
adenine	2.A.29.1.6	The Endoplasmic Reticular adenine Nucleotide Transporter, ER-ANT1 (probable ATP:ADP exchanger; Leroch et al., 2008)	PF00153	Mito_carr	Q8LB08
adenine	2.A.29.11.2	The adenine nucleotide uniporter, BT1 (Leroch et al., 2005).	PF00153	Mito_carr	Q9ZNY4
adenine	2.A.39.2.3	The hypoxanthine/adenine/guanine (purine) transporter, Fcy21 (Goudela et al., 2006)	PF02133	Transp_cyt_pur	Q708J7
adenine	2.A.39.3.11	Purine/uracil uptake porter of 599 aas and 12 TMSs, NCS1 or PLUTO. Nucleobase:proton symporter that facilitates the uptake of nucleobases in the cells. Can transport adenine, guanine and uracil (Witz et al. 2014). Contributes to uracil import into plastids for plastidic uracil salvage which is essential for plant growth and development (Witz et al. 2012).	PF02133	Transp_cyt_pur	Q9LZD0
adenine	2.A.39.3.12	NCS1 of 540 aas and 12 TMSs. Transports adenine, guanine, hypoxanthine, cytosine, and allantoin and competitively binds xanthine and uric acid. The closely related Zea mays NCS1 transports adenine, guanine, and cytosine and competitively binds, 5-fluorocytosine, hypoxanthine, xanthine, and uric acid. The differences in these NCS1 profiles are due to a limited number of amino acid differences (Rap…	PF02133	Transp_cyt_pur	V9SBV7
adenine	2.A.39.3.14	NCS1 of 528 aas and 12 TMSs. Transporter of adenine, guanine, uracil and allantoin (Schein et al. 2013).			A8J166	deleted
adenine	2.A.40.7.1	The purine (hypoxanthine/adenine/guanine) transporter, AzgA (Cecchetto et al., 2004). Topological modeling has revealed a potential substrate binding cavity, and residues important for transport activity have been identified (Krypotou et al. 2014).	PF00860	Xan_ur_permease	Q7Z8R3
adenine	2.A.40.7.6	adenine permease, PurP. Also recognize with low micromolar affinity N(6)-benzoyladenine, 2,6-diaminopurine, and purine (Papakostas et al. 2013).	PF00860	Xan_ur_permease	P31466
adenine	2.A.57.2.10	Nucleoside/nucleobase transporter 1, AT-A or NT11.1, of 482 aas and 11 TMSs. Transports adenine, xanthine and hypoxanthine as well as the drug, pentamidine (Schmidt et al. 2018; Zhang et al. 2022).	PF01733	Nucleoside_tran	Q38CR7
adenine	2.A.57.2.2	Nucleoside (nucleobase, drug) transporter of 463 aas, AT1 or P2. Transports adenosine and adenine as well as the drugs, eflornithine, melarsoprol, pentamidine, diminazene and cordycepin (Schmidt et al. 2018; Zhang et al. 2022); Kasozi et al. 2022).	PF01733	Nucleoside_tran	Q9Y0H9
adenine	2.A.57.2.5	High-affinity nucleobase transporter (transports adenine, hypoxanthine, xanthine, guanine, guanosine, allopurinol, and inosine) (Burchmore et al., 2003)	PF01733	Nucleoside_tran	Q86MB6
adenine	2.A.57.2.6	High affinity purine nucleobase (hypoxanthine, guanine, xanthine, adenine, allopurinol) transporter, NT3 (Ortiz et al., 2007)	PF01733	Nucleoside_tran	Q4QG33
adenine	2.A.57.2.7	Low affinity adenine transporter, NT4 (Ortiz et al., 2007)	PF01733	Nucleoside_tran	Q4QH25
adenine	2.A.57.4.4	adenine/adenosine uptake porter, NT4 or ENT4, of 434 aas and 11 TMSs in a 6 + 5 TMS arrangement.	PF01733	Nucleoside_tran	Q8I2A8
adenine	2.A.7.14.1	Purine/pyrimidine organocation uptake permease, AtPUP1. A thaliana has 15 paralogues, AtPUP1 to AtPUP15 (Gillissen et al. 2000). PUP1 transports adenine and cytosine with high affinity by a pmf-dependent mechanism. Purine derivatives (e.g., hypoxanthine), phytohormones (e.g., zeatin and kinetin), and alkaloids (e.g., caffeine) are potent competitive inhibitors of adenine and cytosine uptake and a…	PF16913	PUNUT	Q9FZ96
adenine	2.A.7.14.4	Purine permease 2 (AtPUP2). PUP2 transports cytokinins (trans- and cis-zeatin, kinetin, benzyladenine, isopentenyladenine, and to a lesser extent trans-zeatin riboside)	PF16913	PUNUT	Q94GB1
cytosine	2.A.39.1.1	cytosine permease	PF02133	Transp_cyt_pur	P0AA82
cytosine	2.A.39.3.12	NCS1 of 540 aas and 12 TMSs. Transports adenine, guanine, hypoxanthine, cytosine, and allantoin and competitively binds xanthine and uric acid. The closely related Zea mays NCS1 transports adenine, guanine, and cytosine and competitively binds, 5-fluorocytosine, hypoxanthine, xanthine, and uric acid. The differences in these NCS1 profiles are due to a limited number of amino acid differences (Rap…	PF02133	Transp_cyt_pur	V9SBV7
cytosine	2.A.57.1.3	Equilibrative high affinity nucleoside transporter (nitrobenzyl-thioinosine-sensitive) (transports thymidine, adenosine, cytosine, and guanosine; inosine and hypoxanthine are poorly transported). Uridine uptake in the basolateral membrane of sertoli cells is selectively inhibited by 100 nM nitrobenzylmercaptopurine riboside (NBMPR, 6-S-[(4-nitrophenyl)methyl]-6-thioinosine) (Klein et al. 2013).	PF01733	Nucleoside_tran	O54698
cytosine	2.A.57.2.1	Concentrative nucleoside (adenosine, uridine, cytosine, tubercidin):H+ symporter, NT1.1 (The Leishmania major orthologue, NT1.1 (Q4QF58), also transports tubercidin) (Stein et al., 2003). TMS 5 is an amphipathic helix that forms part of the nucleoside translocation pathway (Valdés et al. 2004). The intracellular and extracellular gates have been defined by modeling FucP (Valdés et al. 2012; Valdé…	PF01733	Nucleoside_tran	O76343
cytosine	2.A.7.14.1	Purine/pyrimidine organocation uptake permease, AtPUP1. A thaliana has 15 paralogues, AtPUP1 to AtPUP15 (Gillissen et al. 2000). PUP1 transports adenine and cytosine with high affinity by a pmf-dependent mechanism. Purine derivatives (e.g., hypoxanthine), phytohormones (e.g., zeatin and kinetin), and alkaloids (e.g., caffeine) are potent competitive inhibitors of adenine and cytosine uptake and a…	PF16913	PUNUT	Q9FZ96
uracil	2.A.39.3.10	uracil uptake porter, FurD of 544 aas (Krypotou et al. 2015).	PF02133	Transp_cyt_pur	A6N844
uracil	2.A.39.3.11	Purine/uracil uptake porter of 599 aas and 12 TMSs, NCS1 or PLUTO. Nucleobase:proton symporter that facilitates the uptake of nucleobases in the cells. Can transport adenine, guanine and uracil (Witz et al. 2014). Contributes to uracil import into plastids for plastidic uracil salvage which is essential for plant growth and development (Witz et al. 2012).	PF02133	Transp_cyt_pur	Q9LZD0
uracil	2.A.39.3.13	uracil-specific permease of 581 aas and 11 or 12 TMSs. FUR4. Deletion of the FUR4 gene confers resistance to 5-fluorouracil as well as cross-resistance to triazoles and imidazole antifungal agents when they are used simultaneously with 5-fluorouracil although the nucleobase transporters are not involved in azole uptake. Only fluorinated pyrimidines, not pyrimidines themselves, are able to promote…	PF02133	Transp_cyt_pur	R9WAS9
uracil	2.A.39.3.14	NCS1 of 528 aas and 12 TMSs. Transporter of adenine, guanine, uracil and allantoin (Schein et al. 2013).			A8J166	deleted
uracil	2.A.39.3.15	Uptake porter for allantoin, uric acid (urate) and uracil and related analyogues, FurE of 527 aas and 12 TMSs. Evidence has been presented that both the C- and/or N-terminal domains are involved in intramolecular dynamics critical for substrate selection (Papadaki et al. 2017). The last two TMSs in the APC-type FurE transporter act as an intramolecular chaperone, essential for concentrative ER-ex…	PF02133	Transp_cyt_pur	Q5ATG4
uracil	2.A.39.3.2	uracil/uridine permease	PF02133	Transp_cyt_pur	P05316
uracil	2.A.39.3.7	uracil permease	PF02133	Transp_cyt_pur	Q10279
uracil	2.A.40.1.1	uracil permease, UraA. The crystal structure of UraA with bound uracil at 2.8 Å resolution is available (PDB: 3QE7) (Lu et al., 2011). UraA has a novel structural fold, with 14 TMSs divided into two inverted repeats. A pair of antiparallel β-strands is located between TMS3 and TMS10 and has an important role in structural organization and substrate recognition. The structure is spatially arranged…	PF00860	Xan_ur_permease	P0AGM7
uracil	2.A.40.1.2	High affinity uracil permease (Martinussen et al. 2001).	PF00860	Xan_ur_permease	Q9CF78
uracil	2.A.40.1.4	uracil permease	PF00860	Xan_ur_permease	P39766
uracil	2.A.40.4.1	High affinity uric acid-xanthine permease, UapA. Functionaly critical residues in transmembrane segments 1 and 3 have been identified (Amillis et al., 2011). The substrate recognition and transport pathway have been proposed (Kosti et al., 2012; Kosti et al. 2010). UapA oligomerization is essential for membrane trafficking and turnover and is a common theme in fungi and mammalian cells (Martzouko…	PF00860	Xan_ur_permease	Q07307
uracil	2.A.7.19.1	Allantoin permease, UPS1 (may also transport uracil and 5-fluorouracil) (10 TMSs) (Schmidt et al., 2004)	PF07168	Ureide_permease	Q6S9Z3
uracil	2.A.7.19.3	Ureide Permease 5, UPS5 of 415 aas and 10 TMSs. Proton-coupled transporter that transports a wide spectrum of oxo derivatives of heterocyclic nitrogen compounds, including allantoin, uric acid and xanthine, but not adenine. UPS5 mediates transport of uracil and 5-fluorouracil (a toxic uracil analog) (Schmidt et al. 2006). Allantoin accumulation mediated by UPS5 confers salt stress tolerance (Lesc…	PF07168	Ureide_permease	Q93Z75
uracil	2.A.7.19.4	Ureide permease 2, UPS2, of 398 aas and 10 TMSs. Proton-coupled transporter that transports a wide spectrum of oxo derivatives of heterocyclic nitrogen compounds, including allantoin, uric acid and xanthine, but not adenine. Mediates high affinity transport of uracil and 5-fluorouracil (a toxic uracil analog). Mediates transport of free pyrimidines and may function during early seedling developme…	PF07168	Ureide_permease	Q9ZQ89
Uric acid	2.A.1.1.47	The embryonic liver, kidney, and other tissue uric acid (urate) transporter, Glut9 (SLC2A9) (Wright et al. 2010). Mutations in this transporter cause severe renal hyperuricemia. It transports hexoses as well as urate, the latter by an electrogenic uniport mechanism. It's transcription is regulated by a hepatocyte nuclear factor, HNF4α (Prestin et al. 2014).	PF00083	Sugar_tr	Q5ERC7
Uric acid	2.A.1.1.72	The kidney basolateral urate efflux transporter (SLC2A9, URATv1 or GLUT9) (orthologue of 2.A.1.1.47) (Anzai et al., 2008). Human SLC2A9a and SLC2A9b isoforms mediate electrogenic transport of urate with different characteristics in the presence of hexoses (Witkowska et al., 2012). It transports hexoses as well as urate, the latter by a uniport mechanism, thus catalyzing uptake as well as efflux. …	PF00083	Sugar_tr	Q9NRM0
Uric acid	2.A.1.14.27	Voltage-driven Na+:phosphate cotransporter; solute carrier family 17, member 1. Orthologous to 2.A.1.14.6. Transports other anions including urate; functions in urate cell elimination at the renal apical membrane (Prestin et al. 2014).	PF07690	MFS_1	Q14916
Uric acid	2.A.1.14.28	Solute carrier family 17 (sodium phosphate), member 3. Catalyzes voltage-driven Na+:phosphate cotransport, but also functions in cell elimination of urate at renal tubular cell apical membranes (Prestin et al. 2014).	PF07690	MFS_1	O00476
Uric acid	2.A.1.19.10	The apical proximal tubular kidney/placenta organic anion transporter 4, Oat4 (Slc22a11) (transports estrone sulfate (Km = 1 µM), dehydroepiandrosterone sulfate (Km = 60µM), many anionic drugs, diuretics, bile salts, urate and ochratoxin A). Catalyzes Na+-independent efflux, possibly using glutamate as a counter anion in an exchange reaction, especially in the placenta (Lofthouse et al. 2015). Fu…	PF00083	Sugar_tr	Q9NSA0
Uric acid	2.A.1.19.11	The apical proximal tubular renal urate:anion exchanger, URAT1 (Slc22a12). Catalyzes Na+-independent anion efflux (secretion) and reabsorption (Eraly et al., 2003a,b; Anzai and Endou, 2011; Prestin et al. 2014) Regulated by the PDZK1 protein; Anzai et al., 2004). Also transports orotate, a precursor of pyrimidine biosynthesis (Miura et al., 2011). Mutations in URAT1 cause hereditary renal hypouri…	PF07690	MFS_1	Q96S37
Uric acid	2.A.1.19.14	Brush border glycosylated urate (Km= 1.2 mM) tranporter, RST. Orthologous to the human URAT1. Inhibited by 50 μM benzbromarone, 1 mM probenecid and 10 mM lactate which may also be transported and trans-stimulate urate uptake. May be orthologous to 2.A.1.19.11 as well (Hosoyamada et al., 2004). Involved in urate absorption across the apical membrane, but probably not the primary route (Eraly et al…	PF00083	Sugar_tr	Q8CFZ5
Uric acid	2.A.1.19.17	Kidney organic cation transporter-like 3 ORCTL-3 (OAT10; SLC22A13; Like-3) (Bahn et al., 2008) (transports nicotinate, p-aminohippurate and urate; KM=20-40 mμM) via exchange for lactate). Activated by tumorigeneic mutations in this antitumor gene to promote apoptosis (AbuAli and Grimm 2014). Functions in urate reabsorption (Prestin et al. 2014). Substrate binding and lipid-mediated allostery in t…	PF00083	Sugar_tr	Q9Y226
Uric acid	2.A.1.19.31	Solute carrier family 22 member 6 (Organic anion transporter 1) (hOAT1) (PAH transporter) (hPAHT) (Renal organic anion transporter 1) (hROAT1), Probably orthologous to 2.A.1.19.4. Functions in urate uptake from the circulation across the basolateral membrane of tubular cells (Prestin et al. 2014). It transports methotrexate (anticancer), acyclovir (antiviral), and adefovir (antiviral) (Nigam 2015…	PF00083	Sugar_tr	Q4U2R8
Uric acid	2.A.39.3.12	NCS1 of 540 aas and 12 TMSs. Transports adenine, guanine, hypoxanthine, cytosine, and allantoin and competitively binds xanthine and uric acid. The closely related Zea mays NCS1 transports adenine, guanine, and cytosine and competitively binds, 5-fluorocytosine, hypoxanthine, xanthine, and uric acid. The differences in these NCS1 profiles are due to a limited number of amino acid differences (Rap…	PF02133	Transp_cyt_pur	V9SBV7
Uric acid	2.A.39.3.15	Uptake porter for allantoin, uric acid (urate) and uracil and related analyogues, FurE of 527 aas and 12 TMSs. Evidence has been presented that both the C- and/or N-terminal domains are involved in intramolecular dynamics critical for substrate selection (Papadaki et al. 2017). The last two TMSs in the APC-type FurE transporter act as an intramolecular chaperone, essential for concentrative ER-ex…	PF02133	Transp_cyt_pur	Q5ATG4
Uric acid	2.A.40.3.2	Uric acid permease of 449 aas and 13 TMSs, PucJ. May function together with PucK (TC# 2.A.40.3.4) (Schultz et al. 2001).	PF00860	Xan_ur_permease	O32139
Uric acid	2.A.40.3.3	Uric acid (urate) permease YgfU. YgfU exhibits low affinity (0.5 mM) but high capacity for urate and very poor activity for xanthine. Essential residues were identified. Coversion of Thr-100 to ala resulted in efficient xanthine transport (Papakostas and Frillingos 2012).	PF00860	Xan_ur_permease	Q46821
Uric acid	2.A.40.3.4	Uric acid uptake porter of 430 aas and 13 TMSs, PucK. May function together with PucJ (TC# 2.A.40.3.2) (Schultz et al. 2001).	PF00860	Xan_ur_permease	O32140
Uric acid	2.A.40.4.1	High affinity uric acid-xanthine permease, UapA. Functionaly critical residues in transmembrane segments 1 and 3 have been identified (Amillis et al., 2011). The substrate recognition and transport pathway have been proposed (Kosti et al., 2012; Kosti et al. 2010). UapA oligomerization is essential for membrane trafficking and turnover and is a common theme in fungi and mammalian cells (Martzouko…	PF00860	Xan_ur_permease	Q07307
Uric acid	2.A.40.4.4	Purine (uric acid and xanthine) permease, UapC. Present in many Ascomycetes (Krypotou and Diallinas 2014). Drought is an important abiotic stress that constrains the quality and quantity of tea plants. The green leaf volatiles, Z-3-hexenyl acetate (Z-3-HAC), play an essential role in stress responses (Wang et al. 2023).	PF00860	Xan_ur_permease	P48777
Uric acid	2.A.40.6.7	Solute carrier family 23 member 2-like protein (SLC23.A.4) of 614 aas and 13 or 14 TMSs, SNBT1. Mutations allowed functional insertion into fungal membranes (Kourkoulou et al. 2019). It transports urate and purine nucleobases in a sodium ion-dependent process (Yamamoto et al. 2010; Yasujima et al. 2018).	PF00860	Xan_ur_permease	D2KX48
Uric acid	2.A.60.1.8	Oat4 (SLC21A10). Transports bile salts, eicosanoids, urate, hormones and their conjugates, toxins and other anions. Functions in urate reabsorption across the renal appical membrane (Prestin et al. 2014).	PF07648,PF03137	Kazal_2, OATP	Q9QZX8
Uric acid	2.A.7.19.2	The uptake transporter for allantoin (Km = 50 μM) and other oxo derivatives of nitrogen heterocyclic compounds, UPS1 (ureide:H+ symport permease) (10 TMSs; 5 paralogues in Arabidopsis). Also transports purine degradation products such as uric acid and xanthine but not adenine (Desimone et al., 2002).	PF07168	Ureide_permease	Q9ZPR7
Uric acid	2.A.7.19.3	Ureide Permease 5, UPS5 of 415 aas and 10 TMSs. Proton-coupled transporter that transports a wide spectrum of oxo derivatives of heterocyclic nitrogen compounds, including allantoin, uric acid and xanthine, but not adenine. UPS5 mediates transport of uracil and 5-fluorouracil (a toxic uracil analog) (Schmidt et al. 2006). Allantoin accumulation mediated by UPS5 confers salt stress tolerance (Lesc…	PF07168	Ureide_permease	Q93Z75
Uric acid	2.A.7.19.4	Ureide permease 2, UPS2, of 398 aas and 10 TMSs. Proton-coupled transporter that transports a wide spectrum of oxo derivatives of heterocyclic nitrogen compounds, including allantoin, uric acid and xanthine, but not adenine. Mediates high affinity transport of uracil and 5-fluorouracil (a toxic uracil analog). Mediates transport of free pyrimidines and may function during early seedling developme…	PF07168	Ureide_permease	Q9ZQ89
Uric acid	3.A.1.204.2	Drug resistance transporter, ABCG2 (MXR; ABCP; BCRP) (human breast cancer resistance protein, BCRP) (Moitra et al., 2011). It exports urate and haem in haempoietic cells (Latunde-Dada et al., 2006) as well as cytotoxic agents (mitoxantrone, flavopiridol, methotrexate, 7-hydroxymethotrexate, methotrexate diglutamate, topotecan, rosurvastatin, and resveratrol), fluorescent dyes (Hoechst 33342) and …	PF01061,PF19055,PF00005	ABC2_membrane,ABC2_membrane_7,ABC_tran	Q9UNQ0
Uric acid	3.A.1.208.48	Multidrug resistance protein, MRP4 or ABCC4, of 1349 aas and 12 TMSs in an M-C-M-C domain order. The non-steroidal anti-inflammatory drug (NSAID) diclofenac, known to cause hyperuricemia and concomitant visceral gout in Gyps vultures may be a result of interference with renal uric acid excretion. Three species of Gyps vultures are on the verge of extinction due to nephrotoxic veterinary diclofena…	PF00664,PF00005	ABC_membrane,ABC_tran	F1M3J4
Uric acid	9.B.9.1.1	Urate transporter (UAT) is of 322 aas with an uncertain number of TMSs. UAT is a multifunctional protein that can function as a urate channel/transporter, a regulator of thymocyte-epithelial cell interactions, a tumor antigen, an eosinophil chemotactic factor, and a mediator of apoptosis (Lipkowitz et al. 2002). The urate channel activity is regulated by sugars and adenosine (Lipkowitz et al. 200…	PF00337	Gal-bind_lectin	P97840
hypoxanthine	2.A.1.2.25	The purine base/nucleoside (nucleosides: inosine, adenosine and guanosine; bases: hypoxanthine, adenine, guanine, 2-fluoroadenine) efflux pump, YdhL (PbuE) (Johansen et al., 2003; Nygaard and Saxild, 2005; Zakataeva et al., 2007; Sheremet et al. 2011).	PF07690	MFS_1	Q797E3
hypoxanthine	2.A.39.2.3	The hypoxanthine/adenine/guanine (purine) transporter, Fcy21 (Goudela et al., 2006)	PF02133	Transp_cyt_pur	Q708J7
hypoxanthine	2.A.39.3.12	NCS1 of 540 aas and 12 TMSs. Transports adenine, guanine, hypoxanthine, cytosine, and allantoin and competitively binds xanthine and uric acid. The closely related Zea mays NCS1 transports adenine, guanine, and cytosine and competitively binds, 5-fluorocytosine, hypoxanthine, xanthine, and uric acid. The differences in these NCS1 profiles are due to a limited number of amino acid differences (Rap…	PF02133	Transp_cyt_pur	V9SBV7
hypoxanthine	2.A.40.6.7	Solute carrier family 23 member 2-like protein (SLC23.A.4) of 614 aas and 13 or 14 TMSs, SNBT1. Mutations allowed functional insertion into fungal membranes (Kourkoulou et al. 2019). It transports urate and purine nucleobases in a sodium ion-dependent process (Yamamoto et al. 2010; Yasujima et al. 2018).	PF00860	Xan_ur_permease	D2KX48
hypoxanthine	2.A.40.7.1	The purine (hypoxanthine/adenine/guanine) transporter, AzgA (Cecchetto et al., 2004). Topological modeling has revealed a potential substrate binding cavity, and residues important for transport activity have been identified (Krypotou et al. 2014).	PF00860	Xan_ur_permease	Q7Z8R3
hypoxanthine	2.A.40.7.2	hypoxanthine/guanosine uptake transporter, PbuG (Johansen et al., 2003)	PF00860	Xan_ur_permease	O34987
hypoxanthine	2.A.40.7.4	Adenine permease, YicO. Also recognizes with low micromolar affinity N(6)-benzoyladenine, 2,6-diaminopurine, and purines (Papakostas et al. 2013).	PF00860	Xan_ur_permease	P31440
hypoxanthine	2.A.40.7.5	Purine base permease, GhxP or YjcD. Transports purines such as guanine, hypoxanthine, and xanthine. Also transports mutagenic purines such as 6-N-hydroxylaminopurine (HAP), 2-amino-HAP (AHAP), 6-mercaptopurine, 6-thioguanine, 1-methylguanine, 8-azaguanine, 6-thioguanine and 2-aminopurine (Kozmin et al. 2013; Papakostas et al. 2013).	PF00860	Xan_ur_permease	P0AF52
hypoxanthine	2.A.57.1.3	Equilibrative high affinity nucleoside transporter (nitrobenzyl-thioinosine-sensitive) (transports thymidine, adenosine, cytosine, and guanosine; inosine and hypoxanthine are poorly transported). Uridine uptake in the basolateral membrane of sertoli cells is selectively inhibited by 100 nM nitrobenzylmercaptopurine riboside (NBMPR, 6-S-[(4-nitrophenyl)methyl]-6-thioinosine) (Klein et al. 2013).	PF01733	Nucleoside_tran	O54698
hypoxanthine	2.A.57.1.4	Equilibrative low affinity nucleoside transporter (nitrobenzyl-thioinosine-insensitive) (transports adenosine, inosine and hypoxanthine with high affinity; other nucleosides are transported with lower affinity)	PF01733	Nucleoside_tran	O54699
hypoxanthine	2.A.57.2.10	Nucleoside/nucleobase transporter 1, AT-A or NT11.1, of 482 aas and 11 TMSs. Transports adenine, xanthine and hypoxanthine as well as the drug, pentamidine (Schmidt et al. 2018; Zhang et al. 2022).	PF01733	Nucleoside_tran	Q38CR7
hypoxanthine	2.A.57.2.5	High-affinity nucleobase transporter (transports adenine, hypoxanthine, xanthine, guanine, guanosine, allopurinol, and inosine) (Burchmore et al., 2003)	PF01733	Nucleoside_tran	Q86MB6
hypoxanthine	2.A.57.2.6	High affinity purine nucleobase (hypoxanthine, guanine, xanthine, adenine, allopurinol) transporter, NT3 (Ortiz et al., 2007)	PF01733	Nucleoside_tran	Q4QG33
hypoxanthine	2.A.7.14.1	Purine/pyrimidine organocation uptake permease, AtPUP1. A thaliana has 15 paralogues, AtPUP1 to AtPUP15 (Gillissen et al. 2000). PUP1 transports adenine and cytosine with high affinity by a pmf-dependent mechanism. Purine derivatives (e.g., hypoxanthine), phytohormones (e.g., zeatin and kinetin), and alkaloids (e.g., caffeine) are potent competitive inhibitors of adenine and cytosine uptake and a…	PF16913	PUNUT	Q9FZ96
inosine	2.A.1.10.1	Nucleoside porter, NupG. Guanosine, inosine, cytidine and thymidine but not uridine, adenosine and xanthosine are transported (Patching et al. 2005). ADP-glucose is also a substrate of this system (Almagro et al. 2018).	PF03825	Nuc_H_symport	P0AFF4
inosine	2.A.1.10.2	Xanthosine porter, XapB. Xanthosine, inosine, adenosine, cytidine and thymidine but not guanosine and uridine are transported (Seeger et al. 1995). The Km for Xanthosine is 136 μM (Nørholm and Dandanell 2001). The transporter is encoded within an operon with xanthosine phosphorylase which is inactive in S. enterica but can be mutated to the active form (Hansen et al. 2006).	PF03825	Nuc_H_symport	P45562
inosine	2.A.1.2.25	The purine base/nucleoside (nucleosides: inosine, adenosine and guanosine; bases: hypoxanthine, adenine, guanine, 2-fluoroadenine) efflux pump, YdhL (PbuE) (Johansen et al., 2003; Nygaard and Saxild, 2005; Zakataeva et al., 2007; Sheremet et al. 2011).	PF07690	MFS_1	Q797E3
inosine	2.A.1.2.62	Putative MDR pump, YdhC or PunC. It has been reporte to export arabinose but not xylose (Koita and Rao 2012). However, it also takes up adenosine, adenine, deoxyadenosine, and other purine nucleosides and nucleobases such as inosine and guanosine as sole nitrogen sources. It also takes up various sulfonamides such as sulfathiazole, sulfadiazine and sulfamethoxazole. Expression of the punC gene is…	PF07690	MFS_1	P37597
inosine	2.A.41.2.5	Broadly selective nucleoside:Na+ cotransporter, hfCNT (transports uridine, thymidine, inosine, 3'-azido-3'deoxythymidine, 2'3'dideoxycytidine, and 2'3'dideoxyinosine) (Na+/uridine = 2)	PF07670,PF07662,PF01773	Gate,Nucleos_tra2_C,Nucleos_tra2_N	Q9UA35
inosine	2.A.57.1.3	Equilibrative high affinity nucleoside transporter (nitrobenzyl-thioinosine-sensitive) (transports thymidine, adenosine, cytosine, and guanosine; inosine and hypoxanthine are poorly transported). Uridine uptake in the basolateral membrane of sertoli cells is selectively inhibited by 100 nM nitrobenzylmercaptopurine riboside (NBMPR, 6-S-[(4-nitrophenyl)methyl]-6-thioinosine) (Klein et al. 2013).	PF01733	Nucleoside_tran	O54698
inosine	2.A.57.1.4	Equilibrative low affinity nucleoside transporter (nitrobenzyl-thioinosine-insensitive) (transports adenosine, inosine and hypoxanthine with high affinity; other nucleosides are transported with lower affinity)	PF01733	Nucleoside_tran	O54699
inosine	2.A.57.2.3	High affinity, concentrative nucleoside (inosine, formycin, guanosine):H+ symporter, NT2 (Stein et al., 2003). Mutations confer drug (formycin) resistance and drug transport deficiency (Galazka et al. 2006). Asp389 is critical for transporter function without affecting ligand affinity or plasma membrane targeting, but Asn175 and Asp389 (when mutated as a second site mutation) lie in close proximi…	PF01733	Nucleoside_tran	Q9NBV4
inosine	2.A.57.2.4	High-affinity (<5 μM) adenosine/inosine transporter, NT2	PF01733	Nucleoside_tran	Q9U763
inosine	2.A.57.2.5	High-affinity nucleobase transporter (transports adenine, hypoxanthine, xanthine, guanine, guanosine, allopurinol, and inosine) (Burchmore et al., 2003)	PF01733	Nucleoside_tran	Q86MB6
inosine	2.A.57.2.8	Nucleotide transporter 2, NT2, specific for inosine and guanosine, but mutations in TMS 4 which may line the channel allow uptake of adenosine (Arendt & Ullman et al., 2010). (Most similar to 2.A.57.2.3).	PF01733	Nucleoside_tran	Q9GTP4
inosine	3.A.1.2.10	The purine nucleoside permease (probably transports guanosine, adenosine, 2'-deoxyguanosine, inosine and xanthosine with decreasing affinity in this order) (Deka et al., 2006)			O83340
inosine	3.A.1.2.11	The purine nucleoside permease (probably transports guanosine, adenosine, 2'-deoxyguanosine, inosine and xanthosine with decreasing affinity in this order) (Deka et al., 2006)	PF00005	ABC_tran	O83341
inosine	3.A.1.2.12	The purine nucleoside permease (probably transports guanosine, adenosine, 2'-deoxyguanosine, inosine and xanthosine with decreasing affinity in this order) (Deka et al., 2006)	PF02653	BPD_transp_2	O83342
inosine	3.A.1.2.13	The purine nucleoside permease (probably transports guanosine, adenosine, 2'-deoxyguanosine, inosine and xanthosine with decreasing affinity in this order) (Deka et al., 2006)	PF02653	BPD_transp_2	O83343
inosine	3.A.1.2.14	The purine nucleoside permease (probably transports guanosine, adenosine, 2'-deoxyguanosine, inosine and xanthosine with decreasing affinity in this order) (Deka et al., 2006)	PF02608	Bmp	P29724
cyanocob(III)alamin (Vb12)	1.B.14.3.1	BtuB cobalamin receptor (also transports phage C1 DNA across the outer membrane). Two Ca2+ binding sites in BtuB mediate cobalamine binding (Cadieux et al., 2007). Cobalamine uptake into the periplasm is reversible, but efflux is pmf-independent (Cadieux et al., 2007). The 3-d structure is available (PDB#1NQE). The Ton box and the extracellular substrate binding site are allosterically coupled (b…	PF07715,PF00593	Plug,TonB_dep_Rec	P06129
cyanocob(III)alamin (Vb12)	3.A.1.13.1	Vitamin B12 porter. The 3-D structure of BtuCDF has been solved to 2.6 Å (Hvorup et al., 2007). The conformational transition pathways of BtuCD has been revealed by targeted molecular dynamics simulations (Weng et al., 2012). Asymmetric states of BtuCD are not discriminated by its cognate substrate binding protein BtuF (Korkhov et al., 2012). ATP hydrolysis occurs at the nucleotide-binding domain…	PF00005	ABC_tran	P06611
cyanocob(III)alamin (Vb12)	3.A.1.13.1	Vitamin B12 porter. The 3-D structure of BtuCDF has been solved to 2.6 Å (Hvorup et al., 2007). The conformational transition pathways of BtuCD has been revealed by targeted molecular dynamics simulations (Weng et al., 2012). Asymmetric states of BtuCD are not discriminated by its cognate substrate binding protein BtuF (Korkhov et al., 2012). ATP hydrolysis occurs at the nucleotide-binding domain…	PF01032	FecCD	P06609
cyanocob(III)alamin (Vb12)	3.A.1.13.1	Vitamin B12 porter. The 3-D structure of BtuCDF has been solved to 2.6 Å (Hvorup et al., 2007). The conformational transition pathways of BtuCD has been revealed by targeted molecular dynamics simulations (Weng et al., 2012). Asymmetric states of BtuCD are not discriminated by its cognate substrate binding protein BtuF (Korkhov et al., 2012). ATP hydrolysis occurs at the nucleotide-binding domain…	PF01497	Peripla_BP_2	Q8ZRP7
cyanocob(III)alamin (Vb12)	3.A.1.14.23	Two components of a vitamin B12 (cobalamin) uptake porter, BtuCD. BtuAB must exist but have not been identified (Deutschbauer et al. 2011).	PF01032	FecCD	Q8EI19
cyanocob(III)alamin (Vb12)	3.A.1.14.23	Two components of a vitamin B12 (cobalamin) uptake porter, BtuCD. BtuAB must exist but have not been identified (Deutschbauer et al. 2011).	PF00005	ABC_tran	Q8EI20
cyanocob(III)alamin (Vb12)	3.A.1.14.26	Cyanocobalamin uptake porter with 3 components, R, M and C (Mandal et al. 2019).	PF00005	ABC_tran	Q5SKA0
cyanocob(III)alamin (Vb12)	3.A.1.14.26	Cyanocobalamin uptake porter with 3 components, R, M and C (Mandal et al. 2019).	PF01032	FecCD	Q5SKA1
cyanocob(III)alamin (Vb12)	3.A.1.14.26	Cyanocobalamin uptake porter with 3 components, R, M and C (Mandal et al. 2019).	PF01497	Peripla_BP_2	Q5SKA2
cyanocob(III)alamin (Vb12)	9.B.87.1.34	Cubilin (CUBN, IFCR) of 3623 aas and one N-terminal TMS plus several C-terminal potential TMSs (residues 2950 - 3 623). It is an endocytic receptor which plays a role in lipoprotein, vitamin and iron metabolism by facilitating their uptake (Kozyraki et al. 1998, Fyfe et al. 2004). It acts together with LRP2 to mediate endocytosis of high-density lipoproteins, GC, hemoglobin, ALB, TF and SCGB1A1, …	PF00431,PF00008,PF12947,PF07645	CUB,EGF,EGF_3,EGF_CA	O60494
nicotinamide (Vb3)	2.A.17.3.25	Protein NRT1/ PTR FAMILY 5.8, NPF5.8 or NAEZT1, of 552 aas and 11 or 12 TMSs. NAET1 and NAET2, function as nicotianamide (nicotinamide NA) transporters required for translocation of both iron and copper to seeds. Chao et al. 2021 showed that NAET1 and NAET2 are predominantly expressed in the shoot and root vascular tissues and mediate secretion of NA out of the cells, resembling the release of ne…	PF00854	PTR2	Q9LFR1
nicotinamide (Vb3)	2.A.17.3.26	Nicotinamine efflux porter of 563 aas and 11 or 12 TMSs. NAET1 and NAET2 function as a nicotianamide (nicotinamide NA) transporters required for translocation of both iron and copper to seeds. Chao et al. 2021 showed that NAET1 and NAET2 are predominantly expressed in the shoot and root vascular tissues and mediate secretion of NA out of cells, resembling the release of neurotransmitters from ani…	PF00854	PTR2	Q9SRI2
nicotinamide (Vb3)	9.A.23.1.1	The putative niacin/nicotinamide transporter, NiaY (Rodionov et al. 2008)	PF13303	PTS_EIIC_2	Q9K7V5
pyridoxine (Vb6)	2.A.1.2.1	pyridoxine, pyridoxal, pyridoxamine, amiloride:H+ cotransporter (Km (pyridoxine) = 22 μM) (Stolz et al., 2005). Also takes up thiamine (Vogl et al., 2008).	PF07690	MFS_1	P33532
pyridoxine (Vb6)	2.A.39.2.2	The vitamin B6:H+ symporter, Tpn1 (pyridoxine, pyridoxal and pyridoxamine are substrates) (Stolz and Vielreicher, 2003)	PF02133	Transp_cyt_pur	P53099
pyridoxine (Vb6)	2.A.7.14.6	Tobacco nicotine uptake permease 1, NUP1, of 353 aas and 10 TMSs. NUP1 transports tobacco alkaloids such as nicotine, but also efficiently takes up pyridoxamine, pyridoxine and anatabine. The naturally occurring (S)-isomer of nicotine was preferentially transported over the (R)-isomer. NUP1, similar to PUP1 of A. thaiana, transported various compounds containing a pyridine ring, but the two trans…	PF16913	PUNUT	G8A929
riboflavin(Vb2)	2.A.1.13.4	The high affinity (17 μM) facilitated diffusion, riboflavin-regulated riboflavin uptake system, Mch5 (Reihl and Stolz, 2005)	PF07690	MFS_1	Q08777
riboflavin(Vb2)	2.A.1.3.72	riboflavin transporter of 456 aas and 14 TMSs, RibZ (Gutiérrez-Preciado et al. 2015).	PF07690	MFS_1	Q180E3
riboflavin(Vb2)	2.A.1.81.5	riboflavin uptake transporter of 398 aas and 12 TMSs, RfnT (Gutiérrez-Preciado et al. 2015).	PF07690	MFS_1	A6X7E7
riboflavin(Vb2)	2.A.125.1.1	The riboflavin (Km = 40μM) transporter, RFT1, SLC52A1, of 448 aas and 11 TMSs in a 6 + 5 TMS arrangement (Yonezawa et al. 2008). The C-terminal 150 aas are 92% identical to porcine endogenous retrovirus A receptor 2 (PERV-A receptor 2) and 57% identical to the G-protein-coupled receptor 172A (XP_001519123).RFT1 is also a viral receptor, and the putative structural and functional properties of the…	PF06237	SLC52_ribofla_tr	B5MEV1
riboflavin(Vb2)	2.A.125.1.2	Solute carrier family 52, riboflavin transporter, member 3 (riboflavin transporter 2) (hRFVT2, RFVT3). riboflavin transporter deficiency (RTD) is a rare neurological condition that encompasses the Brown-Vialetto-Van Laere and Fazio-Londe syndromes. Since the discovery of pathogenic mutations in the SLC52A2 and SLC52A3 genes that encode human riboflavin transporters RFVT2 and RFVT3, treatment with…	PF06237	SLC52_ribofla_tr	Q9NQ40
riboflavin(Vb2)	2.A.125.1.3	Solute carrier family 52, riboflavin transporter, member 2 (Porcine endogenous retrovirus A receptor 1) (PERV-A receptor 1) (Protein GPR172A) (riboflavin transporter 2) (hRFVT2) (Yonezawa and Inui 2013). riboflavin transporter deficiency (RTD) is a rare neurological condition that encompasses the Brown-Vialetto-Van Laere and Fazio-Londe syndromes since the discovery of pathogenic mutations in the…	PF06237	SLC52_ribofla_tr	Q9HAB3
riboflavin(Vb2)	2.A.7.3.42	Putative riboflavin porter, ImpX. Regulated by FMN riboswitch (Vitreschak et al. 2002)	PF00892	EamA	Q5WDG6
riboflavin(Vb2)	2.A.7.3.54	riboflavin uptake transporter, RibN of 302 aas and 10 putative TMSs (García Angulo et al. 2013).	PF00892	EamA	Q1MIM3
riboflavin(Vb2)	2.A.7.3.55	riboflavin transporter, RibN, of 284 aas and 8 putative TMSs (García Angulo et al. 2013).	PF00892	EamA	A6WUW2
riboflavin(Vb2)	2.A.7.3.56	riboflavin uptake porter, RibN, of 284 aas and 10 TMSs (García Angulo et al. 2013).			C2I8T0	deleted
riboflavin(Vb2)	2.A.7.3.65	riboflavin (vitamin B2) uptake porter, ImpX, of 301 aas and 10 TMSs. the Khalf for riboflavin uptake was 20 µM. Transport experiments suggested that the energy source is the proton motive force (Rodionova et al. 2019).	PF00892	EamA	M4V8N5
riboflavin(Vb2)	2.A.7.3.71	riboflavin uptake transporter of 299 aas and 10 TMSs, ImpX (Gutiérrez-Preciado et al. 2015).	PF00892	EamA	D5RAW5
riboflavin(Vb2)	2.A.87.1.1	The riboflavin uptake transporter, RibU (may also transport roseoflavin and flavin mononucleotide (FMN)) (Burgess et al., 2006). Substrates noted above bind RibU with nM (Vitamin B2 with 0.6 nM) affinity with 1:1 stoichiometry; FAD does not bind (Duurkens et al., 2007).			Q1RN04	deleted
riboflavin(Vb2)	2.A.87.1.2	riboflavin transporter RibU (riboflavin ECF transporter S component RibU or YpaA). Regulated by FMN riboswitch (Rodionov et al. 2009). RibU-mediated riboflavin uptake was sensitive to protonophores and reduced in the absence of glucose, demonstrating that the protein requires metabolic energy for substrate translocation (Vogl et al. 2007).	PF12822	ECF_trnsprt	P50726
riboflavin(Vb2)	2.A.87.1.3	riboflavin ECF Transporter, RibU. The substrate-binding component (S) has been solved by x-ray crystallography (Zhang et al., 2010).			D3EWM9	deleted
riboflavin(Vb2)	2.A.87.1.4	The riboflavin transporter of 203 aas and 5 TMSs, RibU or EcfS. Mediates riboflavin and maybe also FMN, FAD and roseoflavin uptake (and efflux) (Light et al. 2018). Interacts with the energy-coupling factor (ECF) module, EcfAA'T, which energizes transport of a number of different substrates, each with its own EcfS subunit. Does not use an extracytoplasmic receptor (Karpowich et al. 2015). It prov…	PF12822	ECF_trnsprt	Q8Y5W0
riboflavin(Vb2)	2.A.87.4.1	riboflavin uptake transporter of 228 aas and 5 TMSs (Gutiérrez-Preciado et al. 2015).			Q6F0N9
riboflavin(Vb2)	2.A.87.4.2	Putative riboflavin transporter of 227 aas and 5 TMSs (Gutiérrez-Preciado et al. 2015).			Q2SR56
riboflavin(Vb2)	2.A.87.4.3	Uncharacterized protein, probably a riboflavin transporter of 234 aas and 5 TMSs.	PF12822	ECF_trnsprt	Q14P12
riboflavin(Vb2)	3.A.1.17.11	Putative ABC transporter specific for riboflavin, RibXYZ. RibY is called "NMT1/THI5 like domain protein" (Anderson et al. 2015).	PF09084	NMT1	D1CEG8
riboflavin(Vb2)	3.A.1.17.11	Putative ABC transporter specific for riboflavin, RibXYZ. RibY is called "NMT1/THI5 like domain protein" (Anderson et al. 2015).	PF00528	BPD_transp_1	D1CEG9
riboflavin(Vb2)	3.A.1.17.13	Putative thiamine (vitamin B1)-specific transporter, ThiXYZ (Rodionova et al. 2015).	PF09084	NMT1	A9WDR9
riboflavin(Vb2)	3.A.1.17.13	Putative thiamine (vitamin B1)-specific transporter, ThiXYZ (Rodionova et al. 2015).	PF00528	BPD_transp_1	A9WDS0
riboflavin(Vb2)	3.A.1.17.13	Putative thiamine (vitamin B1)-specific transporter, ThiXYZ (Rodionova et al. 2015).	PF00005	ABC_tran	A9WDR8
riboflavin(Vb2)	3.A.1.17.14	riboflavin uptake porter, RibXY (RibX, 168 aas and 6 TMSs; RibY, 351 aas) (Gutiérrez-Preciado et al. 2015).	PF00528	BPD_transp_1	A9WGD1
riboflavin(Vb2)	3.A.1.17.14	riboflavin uptake porter, RibXY (RibX, 168 aas and 6 TMSs; RibY, 351 aas) (Gutiérrez-Preciado et al. 2015).	PF09084	NMT1	A9WGD2
riboflavin(Vb2)	3.A.1.17.7	Putative riboflavin transport system, RibXY. Regulated by an FMN riboswitch (Vitreschak et al. 2002).	PF00528	BPD_transp_1	A7NLS3
riboflavin(Vb2)	3.A.1.17.7	Putative riboflavin transport system, RibXY. Regulated by an FMN riboswitch (Vitreschak et al. 2002).	PF09084	NMT1	A7NLS2
riboflavin(Vb2)	3.A.1.2.28	riboflavin uptake ABC transporter, RfuABCD. The periplasmic binding protein (RfuA) has been crystallized at 1.3 Å resolution with riboflavin bound (Deka et al. 2013). Similar systems are found in other spirochetes such as Treponema denticola, and Borrelia burgdorferi (Deka et al. 2013).	PF02653	BPD_transp_2	O83323
riboflavin(Vb2)	3.A.1.2.28	riboflavin uptake ABC transporter, RfuABCD. The periplasmic binding protein (RfuA) has been crystallized at 1.3 Å resolution with riboflavin bound (Deka et al. 2013). Similar systems are found in other spirochetes such as Treponema denticola, and Borrelia burgdorferi (Deka et al. 2013).			R9USS2	deleted
riboflavin(Vb2)	3.A.1.2.28	riboflavin uptake ABC transporter, RfuABCD. The periplasmic binding protein (RfuA) has been crystallized at 1.3 Å resolution with riboflavin bound (Deka et al. 2013). Similar systems are found in other spirochetes such as Treponema denticola, and Borrelia burgdorferi (Deka et al. 2013).			R9UW99
riboflavin(Vb2)	3.A.1.2.28	riboflavin uptake ABC transporter, RfuABCD. The periplasmic binding protein (RfuA) has been crystallized at 1.3 Å resolution with riboflavin bound (Deka et al. 2013). Similar systems are found in other spirochetes such as Treponema denticola, and Borrelia burgdorferi (Deka et al. 2013).	PF02653	BPD_transp_2	O83324	deleted
riboflavin(Vb2)	3.A.1.25.5	Biotin/riboflavin ECF transport system, EcfAA'T/RibU/BioY (Karpowich and Wang 2013). RibU binds riboflavin with high affinity, and the protein-substrate complex is exceptionally stable in solution. The crystal structure of riboflavin-bound RibU reveals an electronegative binding pocket at the extracellular surface in which the substrate is completely buried (Karpowich et al. 2016).	PF12822	ECF_trnsprt	Q9X1G6
riboflavin(Vb2)	3.A.1.25.5	Biotin/riboflavin ECF transport system, EcfAA'T/RibU/BioY (Karpowich and Wang 2013). RibU binds riboflavin with high affinity, and the protein-substrate complex is exceptionally stable in solution. The crystal structure of riboflavin-bound RibU reveals an electronegative binding pocket at the extracellular surface in which the substrate is completely buried (Karpowich et al. 2016).	PF02361	CbiQ	Q9X2I1
riboflavin(Vb2)	3.A.1.25.5	Biotin/riboflavin ECF transport system, EcfAA'T/RibU/BioY (Karpowich and Wang 2013). RibU binds riboflavin with high affinity, and the protein-substrate complex is exceptionally stable in solution. The crystal structure of riboflavin-bound RibU reveals an electronegative binding pocket at the extracellular surface in which the substrate is completely buried (Karpowich et al. 2016).	PF00005	ABC_tran	Q9X1Z1
riboflavin(Vb2)	3.A.1.25.5	Biotin/riboflavin ECF transport system, EcfAA'T/RibU/BioY (Karpowich and Wang 2013). RibU binds riboflavin with high affinity, and the protein-substrate complex is exceptionally stable in solution. The crystal structure of riboflavin-bound RibU reveals an electronegative binding pocket at the extracellular surface in which the substrate is completely buried (Karpowich et al. 2016).	PF00005	ABC_tran	Q9WY65
riboflavin(Vb2)	3.A.1.25.5	Biotin/riboflavin ECF transport system, EcfAA'T/RibU/BioY (Karpowich and Wang 2013). RibU binds riboflavin with high affinity, and the protein-substrate complex is exceptionally stable in solution. The crystal structure of riboflavin-bound RibU reveals an electronegative binding pocket at the extracellular surface in which the substrate is completely buried (Karpowich et al. 2016).	PF02632	BioY	Q9WZQ6
riboflavin(Vb2)	3.A.1.25.6	riboflavin ECF transport system, EcfAA'T/RibU (Karpowich and Wang 2013).	PF12822	ECF_trnsprt	Q5M614
riboflavin(Vb2)	3.A.1.25.6	riboflavin ECF transport system, EcfAA'T/RibU (Karpowich and Wang 2013).	PF02361	CbiQ	Q5M245
riboflavin(Vb2)	3.A.1.25.6	riboflavin ECF transport system, EcfAA'T/RibU (Karpowich and Wang 2013).	PF00005	ABC_tran	Q5M243
riboflavin(Vb2)	3.A.1.25.6	riboflavin ECF transport system, EcfAA'T/RibU (Karpowich and Wang 2013).	PF00005	ABC_tran	Q5M244
riboflavin(Vb2)	3.A.1.25.7	The riboflavin uptake system, BioMNY. BioM, EtcA, ATPase, 234 aas; BioN, EtcT, 190 aas, 5 TMSs; BioY, EtcS, 210 aas, 5 TMSs BioY can also function as a secondary carrier and is therefore listed separately under TC# 2.A.88.1.3. ATP-dependent conformational changes drive substrate capture and release when BioMNY are together in a complex (Finkenwirth et al. 2015).	PF00005	ABC_tran	D5ARH0
riboflavin(Vb2)	3.A.1.25.7	The riboflavin uptake system, BioMNY. BioM, EtcA, ATPase, 234 aas; BioN, EtcT, 190 aas, 5 TMSs; BioY, EtcS, 210 aas, 5 TMSs BioY can also function as a secondary carrier and is therefore listed separately under TC# 2.A.88.1.3. ATP-dependent conformational changes drive substrate capture and release when BioMNY are together in a complex (Finkenwirth et al. 2015).	PF02361	CbiQ	D5ARG9
riboflavin(Vb2)	3.A.1.25.7	The riboflavin uptake system, BioMNY. BioM, EtcA, ATPase, 234 aas; BioN, EtcT, 190 aas, 5 TMSs; BioY, EtcS, 210 aas, 5 TMSs BioY can also function as a secondary carrier and is therefore listed separately under TC# 2.A.88.1.3. ATP-dependent conformational changes drive substrate capture and release when BioMNY are together in a complex (Finkenwirth et al. 2015).	PF02632	BioY	D5ARG8
riboflavin(Vb2)	3.A.1.25.8	An ECF ABC transporter with 4 subunits, EcfS/EcfT/EcfA/EcfA'. EcfS is also called RibU; EcfT is also called CbiQ, EcfA is also called Cbi01, and EcfA' is also called Cbi02. This system can take up riboflavin and possibly other vitamins (Karpowich et al. 2015). ATP binding to the EcfAA' ATPases drives a conformational change that dissociates the S subunit from the EcfAA'T ECF module. Upon release …	PF00005	ABC_tran	Q71WH7
riboflavin(Vb2)	3.A.1.25.8	An ECF ABC transporter with 4 subunits, EcfS/EcfT/EcfA/EcfA'. EcfS is also called RibU; EcfT is also called CbiQ, EcfA is also called Cbi01, and EcfA' is also called Cbi02. This system can take up riboflavin and possibly other vitamins (Karpowich et al. 2015). ATP binding to the EcfAA' ATPases drives a conformational change that dissociates the S subunit from the EcfAA'T ECF module. Upon release …	PF02361	CbiQ	Q8Y456
riboflavin(Vb2)	3.A.1.25.8	An ECF ABC transporter with 4 subunits, EcfS/EcfT/EcfA/EcfA'. EcfS is also called RibU; EcfT is also called CbiQ, EcfA is also called Cbi01, and EcfA' is also called Cbi02. This system can take up riboflavin and possibly other vitamins (Karpowich et al. 2015). ATP binding to the EcfAA' ATPases drives a conformational change that dissociates the S subunit from the EcfAA'T ECF module. Upon release …	PF12822	ECF_trnsprt	Q8Y5W0
riboflavin(Vb2)	3.A.1.25.8	An ECF ABC transporter with 4 subunits, EcfS/EcfT/EcfA/EcfA'. EcfS is also called RibU; EcfT is also called CbiQ, EcfA is also called Cbi01, and EcfA' is also called Cbi02. This system can take up riboflavin and possibly other vitamins (Karpowich et al. 2015). ATP binding to the EcfAA' ATPases drives a conformational change that dissociates the S subunit from the EcfAA'T ECF module. Upon release …	PF00005	ABC_tran	Q71WH8
riboflavin(Vb2)	4.B.1.1.5	riboflavin porter, PnuX. Regulated by FMN riboswitch (Vitreschak et al. 2002). PnuX was biochemically characterized (Vogl et al. 2007). Transport by PnuX was not energy dependent and had high apparent affinity for riboflavin (K(m) 11 microM).	PF04973	NMN_transporter	Q8NU75
thiamine(1+) (Vb1)	1.B.14.14.1	The thiamine receptor (BT2390) (energized by TonB/ExbBD) (Rodionov et al. 2002).	PF07715,PF00593	Plug,TonB_dep_Rec	Q8A552
thiamine(1+) (Vb1)	1.B.14.8.4	The thiamine receptor (SO2715) (energized by TonB/ExbBD) (Rodionov et al. 2002)	PF07715,PF00593	Plug,TonB_dep_Rec	Q8EDM8
thiamine(1+) (Vb1)	2.A.1.14.36	Thiamine pathway transporter THI73	PF07690	MFS_1	Q07904
thiamine(1+) (Vb1)	2.A.1.2.1	pyridoxine, pyridoxal, pyridoxamine, amiloride:H+ cotransporter (Km (pyridoxine) = 22 μM) (Stolz et al., 2005). Also takes up thiamine (Vogl et al., 2008).	PF07690	MFS_1	P33532
thiamine(1+) (Vb1)	2.A.3.4.6	The thiamine (vitamin B1) transporter, Thi9 (SPAC9.10). Uptake is inhibited by pyrithiamine, oxythiamine, amprolium, and the thiazole part of thiamine indicating that these compounds are substrates of Thi9 (Vogl et al., 2008).	PF13520	AA_permease_2	Q9UT18
thiamine(1+) (Vb1)	2.A.39.4.1	Thiamine permease, Thi10	PF02133	Transp_cyt_pur	Q05998
thiamine(1+) (Vb1)	2.A.48.1.2	Thiamine uptake transporter-1, THTR-1, the thiamine-responsive megaloblastic anemia (TRMA) protein (Manimaran et al. 2016). Downregulated in Chronic Kidney Disease (CKD) in heart, liver, and brain causing malabsorption (Bukhari et al., 2011).	PF01770	Folate_carrier	O60779
thiamine(1+) (Vb1)	2.A.48.1.4	Thiamine (and biotin) transporter-2, ThTr-2, of 496 aas and 12 TMSs. Downregulated in Chronic Kidney Disease (CKD) in heart, liver, and brain causing malabsorption (Bukhari et al., 2011). Activated by microtubules but not microfilaments (Subramanian et al. 2013). Activated by direct interaction with the 4 TMS protein, TM4 of the L6 family, member 4, TM4SF4 (P48230) (Subramanian et al. 2014). Muta…	PF01770	Folate_carrier	Q9BZV2
thiamine(1+) (Vb1)	2.A.7.24.8	The thiamin uptake transporter, SLC35F3. Involved in hypertension (Zhang et al. 2014; Zang et al. 2016). Its gene appears to play a role in the antiepileptic mood stabilization (AED-MS) treatment response, and may facilitate precision medicine in bipolar disease (Ho et al. 2020).	PF00892	EamA	Q8IY50
thiamine(1+) (Vb1)	2.A.87.2.3	Putative Thiamine Transporter, ThiA (Duf165; YuaJ) (187 aas; 6 TMSs)	PF12822	ECF_trnsprt	F9LXW4
thiamine(1+) (Vb1)	2.A.88.3.1	Thiamin transporter, ThiT (Thiamin ECF transporter S component) (Rodionov et al. 2002; Rodionov et al. 2009).	PF09515	Thia_YuaJ	O32074
thiamine(1+) (Vb1)	2.A.88.3.2	Thiamin transporter, ThiT (Thiamin ECF transporter S component) (Rodionov et al. 2002; Rodionov et al., 2009). High affinity thiamin transporter ThiT (Ka=120 pM). Other substrates include TPP, TMP and pyrithiamin with nM binding constants at 1:1 stoichiometry (protein:ligand). Binding depends on a tryptophan-rich loop between TMSs 5 and 6 (Erkens and Slotboom, 2010). Erkens et al. (2011) presente…	PF09515	Thia_YuaJ	A2RI47
thiamine(1+) (Vb1)	2.A.88.3.3	Thiamin transporter, ThiT (Thiamin ECF transporter S component) (Rodionov et al. 2002; Rodionov et al. 2009).	PF09515	Thia_YuaJ	Q037U3
thiamine(1+) (Vb1)	2.A.92.1.7	Human thiamine pyrophosphate uptake porter, TPPT, a 10 TMS glycoprotein glycosylated on five asparagine residues, some of which are necessary for function (Nabokina et al. 2016). (Solute carrier family 44 member 4).	PF04515	Choline_transpo	Q53GD3
thiamine(1+) (Vb1)	3.A.1.17.8	Putative thiamine transport system, ThiXYZ (Rodionov et al., 2002). Regulated by TPP (thiamin) riboswitch.	PF00528	BPD_transp_1	A7NH43
thiamine(1+) (Vb1)	3.A.1.17.8	Putative thiamine transport system, ThiXYZ (Rodionov et al., 2002). Regulated by TPP (thiamin) riboswitch.	PF09084	NMT1	A7NH44
thiamine(1+) (Vb1)	3.A.1.17.8	Putative thiamine transport system, ThiXYZ (Rodionov et al., 2002). Regulated by TPP (thiamin) riboswitch.	PF00005	ABC_tran	A7NH45
thiamine(1+) (Vb1)	3.A.1.19.1	Thiamin, thiamin monophosphate and thiamin pyrophosphate porter. The 2.25 Å structure of ThiB (TbpA) has been solved (Soriano et al., 2008).	PF00005	ABC_tran	P31548
thiamine(1+) (Vb1)	3.A.1.19.1	Thiamin, thiamin monophosphate and thiamin pyrophosphate porter. The 2.25 Å structure of ThiB (TbpA) has been solved (Soriano et al., 2008).	PF00528	BPD_transp_1	P31549
thiamine(1+) (Vb1)	3.A.1.19.1	Thiamin, thiamin monophosphate and thiamin pyrophosphate porter. The 2.25 Å structure of ThiB (TbpA) has been solved (Soriano et al., 2008).	PF01547	SBP_bac_1	P31550
thiamine(1+) (Vb1)	3.A.1.19.2	The thiamine pyrophosphate (TPP) uptake porter (Bian et al., 2011).	PF00005	ABC_tran	Q73RE4
thiamine(1+) (Vb1)	3.A.1.19.2	The thiamine pyrophosphate (TPP) uptake porter (Bian et al., 2011).	PF00528	BPD_transp_1	Q73RE5
thiamine(1+) (Vb1)	3.A.1.19.2	The thiamine pyrophosphate (TPP) uptake porter (Bian et al., 2011).	PF13343	SBP_bac_6	Q73RE6
thiamine(1+) (Vb1)	3.A.1.26.5	ThiW/CbiQ/CbiO homologues (ThiW: 174 aas; 5 putative TMSs). Possible thiamin uptake porter (Rodionov et al., 2009).	PF02361	CbiQ	A7NRG1
thiamine(1+) (Vb1)	3.A.1.26.5	ThiW/CbiQ/CbiO homologues (ThiW: 174 aas; 5 putative TMSs). Possible thiamin uptake porter (Rodionov et al., 2009).	PF00005	ABC_tran	A7NRG0
thiamine(1+) (Vb1)	3.A.1.26.5	ThiW/CbiQ/CbiO homologues (ThiW: 174 aas; 5 putative TMSs). Possible thiamin uptake porter (Rodionov et al., 2009).	PF09512	ThiW	A7NRF9
thiamine(1+) (Vb1)	3.A.1.30.2	Putative thiamin transporter			Q97RS2	deleted
thiamine(1+) (Vb1)	3.A.1.30.2	Putative thiamin transporter			Q97RS3	deleted
thiamine(1+) (Vb1)	3.A.1.30.2	Putative thiamin transporter			Q97RS4	deleted
thiamine(1+) (Vb1)	4.B.1.1.4	The putative thiamin porter, PnuT. Some PnuT homologs may use a facilitated diffusion mechanism for thiamine uptake (Jaehme et al. 2018). Synthesis of the system is regulated by a TPP riboswitch (Rodionov et al. 2002).	PF04973	NMN_transporter	Q8EDN0

## Sheet: S6
Table S6. ID of query Q pathway proteins.
Protein name	UniprotID	InterPro family
FolE1	P0A6T5	IPR001474
FolE2	P94398	IPR003801
QueD	P65870	IPR007115
QueE	P64554	IPR024924
QueC	B1J004	IPR018317
QueF1	O31678	IPR029500
QueF2	A0A090HRX0	IPR029500
TGT	P0A847	IPR004803
QueA	P0A7F9	IPR003699
QueG	P39288	IPR004453
QueH	R6BFT0	IPR003828
QueK	Q186N9	IPR023186
Qng1	D1C7A6	IPR019438
QueL	Q186P0	IPR006638
QPTR/YhhQ	P37619	IPR003744
QueT	Q188G5	IPR010387
QrtT	Q186P1	IPR024529

## Sheet: S7
Table S7. Strains and plasmid
Plasmid and strain name	Genotype	Reference/ Source
QVDC5642	ΔqueD ΔyhhQ: Kan	R. Zallot
YYF3533	ΔqueD ΔqueF ΔyhhQ Δtgt: Kan	Y. Yuan
pBAD24	AmpR, ColE1, arabinose inducible promoter	L.M. Guzman
pBAD33	CmR, p15A, arabinose inducible promoter	L.M. Guzman
pBAD24::QPTR Ct	pBAD24 yhhQ Ct (AmpR ColE1)	Y. Yuan
pBAD24::TGT Ct	pBAD24 tgt Ct (AmpR ColE1)	Y. Yuan
pBAD33::QPTR Ct	pBAD33 yhhQ Ct (CmR , p15A)	Y. Yuan
pBAD33::TGT Ct	pBAD33 tgt Ct(CmR , p15A)	Y. Yuan
pBAD24::queKQrtTqueL Cd	pBAD24::CD1682-1684 (CmR , p15A)	Y. Yuan
pBAD33::ECF-TAA' qrtT Cd	pBAD33 CD100-102 CD1683(CmR , p15A)	Y. Yuan
pBAD24:: QPTR Ec	pBAD24 yhhQ Ec (AmpR)	R. Zallot
pBAD24:: tgt Ec	pBAD24 tgt Ec (AmpR)	R. Zallot
pBAD24::MMPL Cp	pBAD24:: MMPL Cp (AmpR)	This study
pBAD24::ygjp Cp	pBAD24:: ygjp Cp (AmpR)	This study
pBAD24::ygjp Bd	pBAD24:: ygjp Bd (AmpR)	This study
pBAD24::ygjp Wi	pBAD24:: ygjp Wi (AmpR)	This study
pBAD24:: Hly III Bb	pBAD24:: Hly III Bb (AmpR)	This study
pBAD24:: DMT Ac	pBAD24:: DMT Ac (AmpR)	This study
pBAD24:: MFS Bh	pBAD24:: MFS Bh (AmpR)	This study
pBAD33::UPS Ac	pBAD33:: DMT Ac (CmR)	This study
pBAD24::qng1 Ac and tgt Ct	pBAD24:: DUF2419 Ac and tgt Ct (AmpR)	This study
L.M. Guzman, et al. Tight regulation, modulation, and high-level expression by vectors containing the arabinose PBAD promoter. J. Bacteriol. 177, 4121-4130 (1995).
R. Zallot R, et al. The escherichia coli COG1738 member YhhQ is involved in 7-cyanodeazaguanine (preQ0) transport. Biomolecules. 1;7(1) (2017).
Y. Yuan, et al. Discovery of novel bacterial queuine salvage enzymes and pathways in human pathogens. Proc Natl Acad Sci U S A. 17;116(38):19126–35 (2019).

## Sheet: S8
Table S8. synthesized gene information
Product Type	Name	Insert Length	Insert Sequence	Insertion Point Name	Construct Length	Construct Sequence	Vector Length	Vector Sequence	Vector Name	Replication Origin	Copy Number	Resistance Marker	NGS QC	Yield QC	Yield (ng)	Scale	Restriction enzyme site inserted while ordering the gene 5'-3'
Clonal Gene	Bifidobacterium breve	887	GCGCGGAATTCAGGAGGACAGTAATGAGCGTTTCCATCAGTACGCCATCTGGGCGAAAAATGGCTTCCGCCTCAACAGTTACGCCTTCCGTGACCGCGAGCCAAAAGTCCGGTGCAAGCACCGGCCCCGCCGCACTGGATCGCGCATCGGCCCGCTACAAGGCCGCGCAATCACGTTACCGTCAGGCCAAAGCCGCGCTGAAAGCGGTCAAGCGTCAGATTGTTCCCGTGGACGCATTCGGCATACGCAAGCCCCGCCTTCGCGGATGGCTGCACCTCGCCACCCTGCCGCTGTGCATCGCGGCGTCCATCGTGCTCATTTGTATCGCGCCGGCCGGTCCCGTCAAGGCGGCCTGCGCAGTGTACGGTGCCTCGGCCATGCTGCTGTTCGGCAACAGCG…	pTwist Kan	3052	AGGCTAGGTGGAGGCTCAGTGATGATAAGTCTGCGATGGTGGATGCATGTGTCATGGTCATAGCTGTTTCCTGTGTGAAATTGTTATCCGCTCAGAGGGCACAATCCTATTCCGCGCTATCCGACAATCTCCAAGACATTAGGTGGAGTTCAGTTCGGCGTATGGCATATGTCGCTGGAAAGAACATGTGAGCAAAAGGCCAGCAAAAGGCCAGGAACCGTAAAAAGGCCGCGTTGCTGGCGTTTTTCCATAGGCTCCGCCCCCCTGACGAGCATCACAAAAATCGACGCTCAAGTCAGAGGTGGCGAAACCCGACAGGACTATAAAGATACCAGGCGTTTCCCCCTGGAAGCTCCCTCGTGCGCTCTCCTGTTCCGACCCTGCCGCTTACCGGATACC…	2165	AGGCTAGGTGGAGGCTCAGTGATGATAAGTCTGCGATGGTGGATGCATGTGTCATGGTCATAGCTGTTTCCTGTGTGAAATTGTTATCCGCTCAGAGGGCACAATCCTATTCCGCGCTATCCGACAATCTCCAAGACATTAGGTGGAGTTCAGTTCGGCGTATGGCATATGTCGCTGGAAAGAACATGTGAGCAAAAGGCCAGCAAAAGGCCAGGAACCGTAAAAAGGCCGCGTTGCTGGCGTTTTTCCATAGGCTCCGCCCCCCTGACGAGCATCACAAAAATCGACGCTCAAGTCAGAGGTGGCGAAACCCGACAGGACTATAAAGATACCAGGCGTTTCCCCCTGGAAGCTCCCTCGTGCGCTCTCCTGTTCCGACCCTGCCGCTTACCGGATACC…	pTwist Kan High Copy	pMB1	CopyNumber.high	Kan	Pass	Pass	2000	50ng-2µg	EcoR1 and HindIII
Clonal Gene	Corynebacterium propoinquum	2507	GCGCGGAATTCAGGAGGACAGTAGTGGCAAAGTTTTTGTACCGGCTGGGTTTGTTCTCCTTCCGCCATAGCTGGAGCGTGATCATCGCCTGGATCGTCATCCTGGCGGCATCCGTCGGCGCGGCGTTGAGCCTGTCCGGCTCGTTCACCGGTGACTTCGAAATCGACGATACCCCGACGATCGACACCACCAAGCGCGTCGTCGAGCTGTTCCCAGAAGGCGGAAACCCGGCCGCCGCAGCCACGGTGAACCTGGTCTTCCAAGCCCCGGAGGGCGAAAAACTCAGCGATCCGGACAACACTGCCGCGATTGACGACGTCATCGCCAGCCTGGAGGAAAACCTGGTCATCGAGGATGAGCTGCGTTTCGGCAACCCGGTCACGCTGTCGCCGGAGCTGG…	pTwist Kan	4672	AGGCTAGGTGGAGGCTCAGTGATGATAAGTCTGCGATGGTGGATGCATGTGTCATGGTCATAGCTGTTTCCTGTGTGAAATTGTTATCCGCTCAGAGGGCACAATCCTATTCCGCGCTATCCGACAATCTCCAAGACATTAGGTGGAGTTCAGTTCGGCGTATGGCATATGTCGCTGGAAAGAACATGTGAGCAAAAGGCCAGCAAAAGGCCAGGAACCGTAAAAAGGCCGCGTTGCTGGCGTTTTTCCATAGGCTCCGCCCCCCTGACGAGCATCACAAAAATCGACGCTCAAGTCAGAGGTGGCGAAACCCGACAGGACTATAAAGATACCAGGCGTTTCCCCCTGGAAGCTCCCTCGTGCGCTCTCCTGTTCCGACCCTGCCGCTTACCGGATACC…	2165	AGGCTAGGTGGAGGCTCAGTGATGATAAGTCTGCGATGGTGGATGCATGTGTCATGGTCATAGCTGTTTCCTGTGTGAAATTGTTATCCGCTCAGAGGGCACAATCCTATTCCGCGCTATCCGACAATCTCCAAGACATTAGGTGGAGTTCAGTTCGGCGTATGGCATATGTCGCTGGAAAGAACATGTGAGCAAAAGGCCAGCAAAAGGCCAGGAACCGTAAAAAGGCCGCGTTGCTGGCGTTTTTCCATAGGCTCCGCCCCCCTGACGAGCATCACAAAAATCGACGCTCAAGTCAGAGGTGGCGAAACCCGACAGGACTATAAAGATACCAGGCGTTTCCCCCTGGAAGCTCCCTCGTGCGCTCTCCTGTTCCGACCCTGCCGCTTACCGGATACC…	pTwist Kan High Copy	pMB2	CopyNumber.high	Kan	Pass	Pass	2000	50ng-2µg	EcoR1 and HindIII
Clonal Gene	Bartonella henselae	1220	GCGCGGAATTCAGGAGGACAGTAATGAAGTTTTCTCATAAACAAAACGTTCTTGCATCGGAGATTGATGTGAGAACACGGCGTTTGGCAATTTTAGCTCTTGCGGTGGGAAGTTTTGCTATTGGTACGGCAGAGTTTGTTGCAATGGGGCTACAGCCGGAGATGGCACGAAATTCATCTGTTGATATTCCTACAGCGGGTCAATATATTTCTGCTTATGCATTGGGGGTTGTGATTGGAGCCCCTGTTTTGGCTGTTGCGACAGCTCCGTTCTCACGCAAAACTGCTTTAATAGGATTGATGTTTTTTTATGCGCTGGCAAATATTGCCACTGCTTTTTTTTCTGATTTTAGCATATTAGGAACATTGCGCTTTCTTAGTGGTCTTCCCCATGGCATCT…	pTwist Kan	3385	AGGCTAGGTGGAGGCTCAGTGATGATAAGTCTGCGATGGTGGATGCATGTGTCATGGTCATAGCTGTTTCCTGTGTGAAATTGTTATCCGCTCAGAGGGCACAATCCTATTCCGCGCTATCCGACAATCTCCAAGACATTAGGTGGAGTTCAGTTCGGCGTATGGCATATGTCGCTGGAAAGAACATGTGAGCAAAAGGCCAGCAAAAGGCCAGGAACCGTAAAAAGGCCGCGTTGCTGGCGTTTTTCCATAGGCTCCGCCCCCCTGACGAGCATCACAAAAATCGACGCTCAAGTCAGAGGTGGCGAAACCCGACAGGACTATAAAGATACCAGGCGTTTCCCCCTGGAAGCTCCCTCGTGCGCTCTCCTGTTCCGACCCTGCCGCTTACCGGATACC…	2165	AGGCTAGGTGGAGGCTCAGTGATGATAAGTCTGCGATGGTGGATGCATGTGTCATGGTCATAGCTGTTTCCTGTGTGAAATTGTTATCCGCTCAGAGGGCACAATCCTATTCCGCGCTATCCGACAATCTCCAAGACATTAGGTGGAGTTCAGTTCGGCGTATGGCATATGTCGCTGGAAAGAACATGTGAGCAAAAGGCCAGCAAAAGGCCAGGAACCGTAAAAAGGCCGCGTTGCTGGCGTTTTTCCATAGGCTCCGCCCCCCTGACGAGCATCACAAAAATCGACGCTCAAGTCAGAGGTGGCGAAACCCGACAGGACTATAAAGATACCAGGCGTTTCCCCCTGGAAGCTCCCTCGTGCGCTCTCCTGTTCCGACCCTGCCGCTTACCGGATACC…	pTwist Kan High Copy	pMB3	CopyNumber.high	Kan	Pass	Pass	2000	50ng-2µg	EcoR1 and HindIII
Clonal Gene	Winogradskyella sp.	1052	GCGCGGAATTCAGGAGGACAGTAATGTTACTACTATTTATACCTATTGGTATAACCGTAGATCTATCAGAGAAAGTAGGTAAGATTTTGGAAAATAAAGCTCCTTTTGATGAGACTGCAATGTATTATGTAGATTTTACGGTATACTTCGCCAATTTATTATTTCCTTTATTTTTATTTCTCTCTGTAATATGGTTTACGTCAAAGCTAGCTAACAATACTGAGATTGTAGCTTTTTTAAGTTCTGGTGTTTCGTTTTCTAGATTTTTACGTCCTTATTTAATAGGTGCAACTATTGTAGCAGGATTCGCTTTGTTTTTGGGTATGTATTTAGCGCCAATTGCGAGTCAAGGATTTAATGAGTTTAAATTTAAATATCTAAAGAAGAATAAAAAAATTC…	pTwist Kan	3217	AGGCTAGGTGGAGGCTCAGTGATGATAAGTCTGCGATGGTGGATGCATGTGTCATGGTCATAGCTGTTTCCTGTGTGAAATTGTTATCCGCTCAGAGGGCACAATCCTATTCCGCGCTATCCGACAATCTCCAAGACATTAGGTGGAGTTCAGTTCGGCGTATGGCATATGTCGCTGGAAAGAACATGTGAGCAAAAGGCCAGCAAAAGGCCAGGAACCGTAAAAAGGCCGCGTTGCTGGCGTTTTTCCATAGGCTCCGCCCCCCTGACGAGCATCACAAAAATCGACGCTCAAGTCAGAGGTGGCGAAACCCGACAGGACTATAAAGATACCAGGCGTTTCCCCCTGGAAGCTCCCTCGTGCGCTCTCCTGTTCCGACCCTGCCGCTTACCGGATACC…	2165	AGGCTAGGTGGAGGCTCAGTGATGATAAGTCTGCGATGGTGGATGCATGTGTCATGGTCATAGCTGTTTCCTGTGTGAAATTGTTATCCGCTCAGAGGGCACAATCCTATTCCGCGCTATCCGACAATCTCCAAGACATTAGGTGGAGTTCAGTTCGGCGTATGGCATATGTCGCTGGAAAGAACATGTGAGCAAAAGGCCAGCAAAAGGCCAGGAACCGTAAAAAGGCCGCGTTGCTGGCGTTTTTCCATAGGCTCCGCCCCCCTGACGAGCATCACAAAAATCGACGCTCAAGTCAGAGGTGGCGAAACCCGACAGGACTATAAAGATACCAGGCGTTTCCCCCTGGAAGCTCCCTCGTGCGCTCTCCTGTTCCGACCCTGCCGCTTACCGGATACC…	pTwist Kan High Copy	pMB4	CopyNumber.high	Kan	Pass	Pass	2000	50ng-2µg	EcoR1 and HindIII
Clonal Gene	Bacteroides dorei	1202	GCGCGGAATTCAGGAGGACAGTAATGAAGAATTGGTTCAAGACAAACACAGATTCATCCCCAAAGGATAAAAAATGGTGGAAGCCGAATATCAGTTGGCTGAAACTGGATAAATGGGTGAAAAGACTGGACATATATATCATTAAGAAGTTTCTGGGAACCTACTTTTTCGCTATTGCATTGATTATCTCCATTGCAGTAGTGTTTGACGTGAACGAAAATATAGACAGGTTCATCAATAATAAAGCCCCGCTGAAAGCGATTGTATTTGATTATTACATGAACTTCATCCCTTACTTCTCCAATCTGTTCAGCCCCTTGTTTGTCTTTATCGCTGTTATCTTCTTTACTTCCAAGCTGGCAGAAAACTCGGAAATCATTGCCATGTTCTCCACCGGAA…	pTwist Kan	3367	AGGCTAGGTGGAGGCTCAGTGATGATAAGTCTGCGATGGTGGATGCATGTGTCATGGTCATAGCTGTTTCCTGTGTGAAATTGTTATCCGCTCAGAGGGCACAATCCTATTCCGCGCTATCCGACAATCTCCAAGACATTAGGTGGAGTTCAGTTCGGCGTATGGCATATGTCGCTGGAAAGAACATGTGAGCAAAAGGCCAGCAAAAGGCCAGGAACCGTAAAAAGGCCGCGTTGCTGGCGTTTTTCCATAGGCTCCGCCCCCCTGACGAGCATCACAAAAATCGACGCTCAAGTCAGAGGTGGCGAAACCCGACAGGACTATAAAGATACCAGGCGTTTCCCCCTGGAAGCTCCCTCGTGCGCTCTCCTGTTCCGACCCTGCCGCTTACCGGATACC…	2165	AGGCTAGGTGGAGGCTCAGTGATGATAAGTCTGCGATGGTGGATGCATGTGTCATGGTCATAGCTGTTTCCTGTGTGAAATTGTTATCCGCTCAGAGGGCACAATCCTATTCCGCGCTATCCGACAATCTCCAAGACATTAGGTGGAGTTCAGTTCGGCGTATGGCATATGTCGCTGGAAAGAACATGTGAGCAAAAGGCCAGCAAAAGGCCAGGAACCGTAAAAAGGCCGCGTTGCTGGCGTTTTTCCATAGGCTCCGCCCCCCTGACGAGCATCACAAAAATCGACGCTCAAGTCAGAGGTGGCGAAACCCGACAGGACTATAAAGATACCAGGCGTTTCCCCCTGGAAGCTCCCTCGTGCGCTCTCCTGTTCCGACCCTGCCGCTTACCGGATACC…	pTwist Kan High Copy	pMB5	CopyNumber.high	Kan	Pass	Pass	2000	50ng-2µg	EcoR1 and HindIII
Clonal Gene	Chryseobacterium piperi	1085	GCGCGGAATTCAGGAGGACAGTAATGCTCATATTGTTGTCTATAGTTGTATTGGTTATTGATGTCCAGCAGAAAATACCGAGAATTGAAAATGCCACGGCTATTGATGCTAAACTCAACCTTACTTACTTTCTGGTTCACTTTTATCCTTTCTGGATTATCAACCTGATCATGACATTTTTGTCTATTCTGGTCTTTATTTCGGTAATTTACTTTACCTCCAGAATGGCAAATAATACAGAAATCGTTGCTGTAATCAGCAGTGGTGCTAGTTTTCATCGTTTTGCAAGACCTTATCTACTTACTTCTTTGTTTATTGCTTTGATTTCTCTTGTGATCAATCATTTTGTATTACCATGGGCCAATATTAAAAAAAATGAGCTTGAAGCATACACCTATA…	pTwist Kan	3250	AGGCTAGGTGGAGGCTCAGTGATGATAAGTCTGCGATGGTGGATGCATGTGTCATGGTCATAGCTGTTTCCTGTGTGAAATTGTTATCCGCTCAGAGGGCACAATCCTATTCCGCGCTATCCGACAATCTCCAAGACATTAGGTGGAGTTCAGTTCGGCGTATGGCATATGTCGCTGGAAAGAACATGTGAGCAAAAGGCCAGCAAAAGGCCAGGAACCGTAAAAAGGCCGCGTTGCTGGCGTTTTTCCATAGGCTCCGCCCCCCTGACGAGCATCACAAAAATCGACGCTCAAGTCAGAGGTGGCGAAACCCGACAGGACTATAAAGATACCAGGCGTTTCCCCCTGGAAGCTCCCTCGTGCGCTCTCCTGTTCCGACCCTGCCGCTTACCGGATACC…	2165	AGGCTAGGTGGAGGCTCAGTGATGATAAGTCTGCGATGGTGGATGCATGTGTCATGGTCATAGCTGTTTCCTGTGTGAAATTGTTATCCGCTCAGAGGGCACAATCCTATTCCGCGCTATCCGACAATCTCCAAGACATTAGGTGGAGTTCAGTTCGGCGTATGGCATATGTCGCTGGAAAGAACATGTGAGCAAAAGGCCAGCAAAAGGCCAGGAACCGTAAAAAGGCCGCGTTGCTGGCGTTTTTCCATAGGCTCCGCCCCCCTGACGAGCATCACAAAAATCGACGCTCAAGTCAGAGGTGGCGAAACCCGACAGGACTATAAAGATACCAGGCGTTTCCCCCTGGAAGCTCCCTCGTGCGCTCTCCTGTTCCGACCCTGCCGCTTACCGGATACC…	pTwist Kan High Copy	pMB6	CopyNumber.high	Kan	Pass	Pass	2000	50ng-2µg	EcoR1 and PstI
Clonal Gene	Acidobacteriota bacterium	1083	ctgaacgcgtacctgacttcctgcagggcaaggaggacagtaatgatgttcacgccgcaaacgtttccgcttgctctgttgatgatgatcaccagcgcgatttgctggggttcctgggccaatacctataaaggcgtcaagaactaccggttcgagctgttttattgggactatgccatcggcatttttctgattgccctgatttttggccacacgctgggcagcactggacatgacgcgtcgagcctgacgaataacatccatgcagccgatacatcgaacgtcatctatgctctgatcggcggcgcgattttcaacctcgccaacctgctcctggtcgcagccattgacatggcagggttggcagtcgcattccccatctccatcggcattgcgctc…	pTwist Amp MC	3244	CTGAACGCGTACCTGACTTCCTGCAGGGCAAGGAGGACAGTAATGATGTTCACGCCGCAAACGTTTCCGCTTGCTCTGTTGATGATGATCACCAGCGCGATTTGCTGGGGTTCCTGGGCCAATACCTATAAAGGCGTCAAGAACTACCGGTTCGAGCTGTTTTATTGGGACTATGCCATCGGCATTTTTCTGATTGCCCTGATTTTTGGCCACACGCTGGGCAGCACTGGACATGACGCGTCGAGCCTGACGAATAACATCCATGCAGCCGATACATCGAACGTCATCTATGCTCTGATCGGCGGCGCGATTTTCAACCTCGCCAACCTGCTCCTGGTCGCAGCCATTGACATGGCAGGGTTGGCAGTCGCATTCCCCATCTCCATCGGCATTGCGCTC…	2161	AGGCTAGGTGGAGGCTCAGTGATGATAAGTCTGCGATGGTGGATGCATGTGTCATGGTCATAGCTGTTTCCTGTGTGAAATTGTTATCCGCTCAGAGGGCACAATCCTATTCCGCGCTATCCGACAATCTCCAAGACATTAGGTGGAGTTCAGTTCGGCGAGCGGAAATGGCTTACGAACGGGGCGGAGATTTCCTGGAAGATGCCAGGAAGATACTTAACAGGGAAGTGAGAGGGCCGCGGCAAAGCCGTTTTTCCATAGGCTCCGCCCCCCTGACAAGCATCACGAAATCTGACGCTCAAATCAGTGGTGGCGAAACCCGACAGGACTATAAAGATACCAGGCGTTTCCCCCTGGCGGCTCCCTCGTGCGCTCTCCTGTTCCTGCCTTTCGGTTTAC…	pTwist Amp Medium Copy	p15A	CopyNumber.medium	Amp	Pass	Pass	2000	50ng-2µg	SbfI and HindIII

## Sheet: S9
Table S9. Oligonucleotides used in this study
Name	Sequence 5'-3'	Purpose
F_Ac_DMT_NheI_PBAD24	CCGCCGCTAGCaggaggaattcaccatgatgttcacgccgcaaac	Subcloning
R_Ac_DMT_XbaI_PBAD24	GGGCCTCTAGATAATGAcgtgtcgactgcagtggaaagc	Subcloning
F_KpnI_DMT_Ac_pBAD33	CGGGCGGTACCaggaggaattGaccatgaaaattcatcgcttgcttg	Subcloning
R_XbaI_DMT_Ac_pBAD33	GGGCCTCTAGATAATGAcgtgtcgactgcagtggaaagc	Subcloning
F_DUF2419 Ac_tgt Ct_pBAD24	GCCGCAAGCTTaggaggacagtaatgatgaaattcatg	Subcloning
R_DUF2419 Ac_tgt Ct_pBAD24	CGCGGAAGCTTttatcagtacatgatcgtcttggtca	Subcloning
F_Bb_HlyIII_pBAD24	atgagcgtttccatcagtac	Checking
R_Bb_HlyIII_pBAD24	tttacagcgcgcaaac	Checking
F_Bh_MFS_pBAD24	atgaagttttctcataaacaaaac	Checking
R_Bh_MFS_pBAD24	cttttaattacgcttttccatatac	Checking
F_NheI_mMPL_Cp_pBAD24	CCGCCGCTAGCaggaggaattcaggaggaca	Checking
R_KpnI_mMPL_Cp_pBAD24	ttcagtttatcgtgcgatgcttg	Checking
F_ygjp Cp_pBAD24	aattcaggaggacagtaatg	Checking
R_ygjp Cp_pBAD24	gctactgattagctcttctcaggtataa	Checking
F_ygjp_Bd_pBAD24	aattcaggaggacagtaatgaa	Checking
R_ygjp_Bd_pBAD24	aattcaggaggacagtaatgaa	Checking
F_ygjp_Wi_pBAD24	aattcaggaggacagtaat	Checking
R_ygjp_Wi_pBAD24	tttagcgtttggcattttgta	Checking
