# Supplementary material for: Deciphering the Diversity of Bacterial Transporters that Salvage Queuosine Precursors
Source: Preprints.org preprint supplement (doi:10.20944/preprints202403.0245.v1), 2024-03-05
Supplement: Supplementary file 2 [file dataset S1.xlsx]

## Sheet: dataset S1
Dataset A1. Count of Q pathway genes in genomes of human gut microbiome that collected from BIOML, GMbC and UHGG.
genomeID	FolE1_Ec	FolE2_Ec	QueD_Ec	QueE_Ec	QueC_Ec	QueF1_Bsub	QueF2_Ec	TGT_Ec	QueA_Ec	QueG_Ec	QueH_Ec	QPTR_Ct140	QueL_CD1684	QueK_CD1682	QrtT_CD1683	QueT_CD2097	QrtT_CD3073	MFST_Bhou	UPS_Abac	HlyIII_Bbre	order_merge	taxon
0262AD_0917_052_A10	1	0	0	0	0	0	0	1	2	0	1	0	0	1	0	0	0	1	0	0	unknown	p__Actinobacteria(UID2112)
0262AD_0917_052_A1	1	0	0	0	0	0	0	1	1	0	1	0	0	1	0	0	0	1	0	0	unknown	p__Actinobacteria(UID2112)
0262AD_0917_052_A3	1	0	1	1	1	1	1	1	2	0	1	0	0	0	0	0	0	1	1	0	Bacteroidales	o__Bacteroidales(UID2654)
0262AD_0917_052_A4	1	0	1	1	1	1	1	1	2	0	1	0	0	0	0	0	0	1	1	0	Bacteroidales	o__Bacteroidales(UID2654)
0262AD_0917_052_A5	1	0	0	0	0	0	0	1	1	0	1	0	0	0	0	1	0	0	0	1	Clostridiales	o__Clostridiales(UID1226)
0262AD_0917_052_A6	1	0	1	1	1	1	1	1	2	0	1	0	0	0	0	0	0	1	2	0	Bacteroidales	o__Bacteroidales(UID2657)
0262AD_0917_052_A7	1	0	0	0	0	0	0	1	1	0	1	0	0	1	0	0	0	1	0	0	unknown	p__Actinobacteria(UID2112)
0262AD_0917_052_A8	2	0	0	1	1	1	1	1	1	0	1	0	1	0	0	0	0	0	0	1	Clostridiales	f__Lachnospiraceae(UID1256)
0262AD_0917_052_B10	0	0	0	0	0	0	0	1	1	0	1	0	0	0	0	1	0	0	0	0	unknown	k__Bacteria(UID2372)
0262AD_0917_052_B11	1	0	1	1	1	1	1	1	2	0	1	0	0	0	0	0	0	1	2	0	Bacteroidales	o__Bacteroidales(UID2657)
0262AD_0917_052_B1	1	0	1	1	1	1	1	1	2	0	1	0	0	0	0	0	0	1	1	0	Bacteroidales	o__Bacteroidales(UID2654)
0262AD_0917_052_B2	1	0	0	0	0	0	0	1	1	0	1	0	0	1	0	0	0	1	0	0	unknown	p__Actinobacteria(UID2112)
0262AD_0917_052_B3	1	0	1	1	1	1	1	1	2	0	1	0	0	0	0	0	0	1	2	0	Bacteroidales	o__Bacteroidales(UID2657)
0262AD_0917_052_B4	1	0	0	1	1	1	1	1	1	0	1	0	0	0	0	0	0	0	0	1	unknown	p__Actinobacteria(UID2112)
0262AD_0917_052_B5	1	0	0	1	1	1	1	1	2	0	1	0	0	0	0	0	0	3	1	0	Bacteroidales	g__Bacteroides(UID2691)
0262AD_0917_052_B6	0	0	0	0	0	0	0	1	1	0	1	0	0	0	0	1	0	0	0	0	Clostridiales	o__Clostridiales(UID1212)
0262AD_0917_052_B7	0	0	0	0	0	0	0	1	1	0	1	0	0	0	0	1	0	0	0	0	Clostridiales	o__Clostridiales(UID1212)
0262AD_0917_052_B8	1	0	0	1	1	1	1	1	2	1	0	0	0	0	0	0	0	1	1	0	Bacteroidales	o__Bacteroidales(UID2621)
0262AD_0917_052_B9	1	0	1	1	1	1	1	1	2	0	1	0	0	0	0	0	0	1	1	0	Bacteroidales	o__Bacteroidales(UID2654)
0262AD_0917_052_C10	1	0	0	0	0	0	0	1	0	0	0	0	0	2	0	0	0	2	0	1	Bifidobacteriales	f__Bifidobacteriaceae(UID1458)
0262AD_0917_052_C1	1	0	0	1	1	1	1	1	2	1	0	0	0	0	0	0	0	0	1	0	Bacteroidales	o__Bacteroidales(UID2621)
0262AD_0917_052_C2	1	0	0	1	1	1	1	1	2	1	0	0	0	0	0	0	0	1	1	0	Bacteroidales	g__Bacteroides(UID2691)
0262AD_0917_052_C3	2	0	1	1	1	1	1	1	2	0	1	0	0	0	0	0	0	1	1	0	Bacteroidales	o__Bacteroidales(UID2654)
0262AD_0917_052_C4	1	0	0	1	1	1	1	1	2	0	1	0	0	0	0	0	0	3	1	0	Bacteroidales	g__Bacteroides(UID2691)
0262AD_0917_052_C5	1	0	1	1	1	1	1	1	2	0	1	0	0	0	0	0	0	1	2	0	Bacteroidales	o__Bacteroidales(UID2657)
0262AD_0917_052_C6	1	0	1	1	1	1	1	1	2	0	1	0	0	0	0	0	0	1	2	0	Bacteroidales	o__Bacteroidales(UID2654)
0262AD_0917_052_C7	1	0	1	1	1	1	1	1	2	0	1	0	0	0	0	0	0	1	1	0	Bacteroidales	o__Bacteroidales(UID2654)
0262AD_0917_052_C8	0	0	0	0	0	0	0	1	1	0	1	0	0	1	1	0	0	0	0	0	Clostridiales	o__Clostridiales(UID1226)
0262AD_0917_052_C9	1	0	0	1	1	1	1	1	2	1	0	0	0	0	0	0	0	1	1	0	Bacteroidales	g__Bacteroides(UID2691)
0262AD_0917_052_D11	1	0	0	0	0	0	0	1	1	0	1	0	0	1	0	0	0	1	0	0	unknown	p__Actinobacteria(UID2112)
0262AD_0917_052_D1	1	0	0	0	1	1	1	1	2	0	1	0	0	0	0	0	0	1	1	0	Bacteroidales	g__Bacteroides(UID2691)
0262AD_0917_052_D2	0	0	0	0	0	0	0	1	1	0	1	0	0	0	0	0	0	0	0	0	Clostridiales	f__Lachnospiraceae(UID1286)
0262AD_0917_052_D3	1	0	1	1	1	1	1	1	2	0	1	0	0	0	0	0	0	1	1	0	Bacteroidales	o__Bacteroidales(UID2654)
0262AD_0917_052_D4	1	0	0	0	0	0	0	1	1	0	1	0	0	1	0	0	0	1	0	0	unknown	p__Actinobacteria(UID2112)
0262AD_0917_052_D7	1	0	1	1	1	1	1	1	2	0	1	0	0	0	0	0	0	1	1	0	Bacteroidales	o__Bacteroidales(UID2654)
0262AD_0917_052_D8	1	0	0	1	1	1	1	1	2	1	0	0	0	0	0	0	0	1	1	0	Bacteroidales	o__Bacteroidales(UID2621)
0262AD_0917_052_D9	0	0	0	0	0	0	0	1	1	1	0	0	0	0	0	0	0	0	0	0	Lactobacillales	g__Lactobacillus(UID436)
0262AD_0917_052_E10	1	0	1	1	1	1	1	1	2	0	1	0	0	0	0	0	0	1	1	0	Bacteroidales	o__Bacteroidales(UID2657)
0262AD_0917_052_E11	0	0	0	0	0	0	0	1	1	0	1	0	1	4	1	1	0	0	0	1	Clostridiales	o__Clostridiales(UID1226)
0262AD_0917_052_E12	1	0	1	1	1	1	1	1	1	1	0	0	0	0	0	0	0	0	0	0	unknown	p__Firmicutes(UID1022)
0262AD_0917_052_E1	1	0	1	1	1	1	1	1	2	1	0	0	0	0	0	0	0	0	0	0	Bacteroidales	o__Bacteroidales(UID2657)
0262AD_0917_052_E2	1	0	1	1	1	1	1	1	2	0	1	0	0	0	0	0	0	1	2	0	Bacteroidales	o__Bacteroidales(UID2654)
0262AD_0917_052_E3	1	0	1	1	1	1	1	1	2	0	1	0	0	0	0	0	0	1	1	0	Bacteroidales	o__Bacteroidales(UID2654)
0262AD_0917_052_E5	1	0	1	1	1	1	1	1	2	0	1	0	0	0	0	0	0	1	1	0	Bacteroidales	o__Bacteroidales(UID2654)
0262AD_0917_052_E6	2	0	0	0	1	1	1	1	1	0	1	1	1	0	0	0	0	0	0	0	Clostridiales	o__Clostridiales(UID1212)
0262AD_0917_052_E7	1	0	0	0	0	0	0	1	1	0	1	0	0	1	0	0	0	1	0	0	unknown	p__Actinobacteria(UID2112)
0262AD_0917_052_E8	1	0	0	0	0	0	0	1	0	0	0	0	0	2	0	0	0	1	0	2	Bifidobacteriales	f__Bifidobacteriaceae(UID1462)
0262AD_0917_052_E9	0	0	0	0	0	0	0	1	1	0	1	0	0	0	0	1	0	0	0	0	unknown	k__Bacteria(UID2372)
0262AD_0917_052_F11	1	0	1	1	1	1	1	1	2	0	1	0	0	0	0	0	0	1	1	0	Bacteroidales	o__Bacteroidales(UID2654)
0262AD_0917_052_F12	1	0	1	1	1	1	1	1	2	0	1	0	0	0	0	0	0	1	2	0	Bacteroidales	o__Bacteroidales(UID2654)
0262AD_0917_052_F1	1	0	0	1	1	1	1	1	2	1	0	0	0	0	0	0	0	1	1	0	Bacteroidales	o__Bacteroidales(UID2621)
0262AD_0917_052_F2	1	0	1	1	1	1	1	1	2	1	0	0	0	0	0	0	0	0	0	0	Bacteroidales	o__Bacteroidales(UID2657)
0262AD_0917_052_F3	1	0	1	1	1	1	1	1	1	1	0	0	0	0	0	0	0	0	0	0	unknown	p__Firmicutes(UID1022)
0262AD_0917_052_F4	1	0	0	0	1	1	1	1	2	0	1	0	0	0	0	0	0	1	1	0	Bacteroidales	g__Bacteroides(UID2691)
0262AD_0917_052_F5	1	0	1	1	1	1	1	1	2	0	1	0	0	0	0	0	0	1	1	0	Bacteroidales	o__Bacteroidales(UID2654)
0262AD_0917_052_F6	1	0	0	0	0	0	0	1	1	0	1	0	0	1	0	0	0	1	0	0	unknown	p__Actinobacteria(UID2112)
0262AD_0917_052_F7	1	0	1	1	1	1	1	1	2	1	0	0	0	0	0	0	0	0	0	0	Bacteroidales	o__Bacteroidales(UID2657)
0262AD_0917_052_F8	1	0	1	1	1	1	1	1	2	1	0	0	0	0	0	0	0	0	0	0	Bacteroidales	o__Bacteroidales(UID2657)
0262AD_0917_052_F9	0	0	0	0	0	0	0	1	1	0	1	0	0	0	0	1	0	0	0	1	Clostridiales	o__Clostridiales(UID1226)
0262AD_0917_052_G10	1	0	1	1	1	1	1	1	2	0	1	0	0	0	0	0	0	1	2	0	Bacteroidales	o__Bacteroidales(UID2654)
0262AD_0917_052_G11	1	0	1	1	1	1	1	1	2	1	0	0	0	0	0	0	0	0	0	0	Bacteroidales	o__Bacteroidales(UID2657)
0262AD_0917_052_G1	1	0	0	0	0	0	0	1	1	0	1	0	0	0	0	1	0	0	0	1	Clostridiales	f__Lachnospiraceae(UID1286)
0262AD_0917_052_G2	1	0	1	1	1	1	1	1	2	0	1	0	0	0	0	0	0	1	2	0	Bacteroidales	o__Bacteroidales(UID2657)
0262AD_0917_052_G3	1	0	0	0	1	1	1	1	1	0	1	0	0	0	0	1	0	0	0	1	Clostridiales	o__Clostridiales(UID1226)
0262AD_0917_052_G4	0	0	0	0	0	0	0	1	1	0	1	0	0	0	0	1	0	1	0	0	Clostridiales	o__Clostridiales(UID1212)
0262AD_0917_052_G5	1	0	0	0	0	0	0	1	1	0	1	0	0	2	0	1	0	0	0	1	Clostridiales	o__Clostridiales(UID1226)
0262AD_0917_052_G6	1	0	0	0	0	0	0	1	0	0	0	0	0	1	0	0	0	2	0	1	Bifidobacteriales	f__Bifidobacteriaceae(UID1458)
0262AD_0917_052_G7	0	0	0	1	1	1	1	1	2	0	1	0	0	0	0	0	0	3	1	0	Bacteroidales	g__Bacteroides(UID2691)
0262AD_0917_052_G8	0	0	0	0	0	0	0	1	1	0	1	0	0	0	0	0	0	0	0	0	Clostridiales	f__Lachnospiraceae(UID1286)
0262AD_0917_052_G9	1	0	0	0	0	0	0	1	1	0	1	0	0	1	1	1	0	0	0	1	Clostridiales	o__Clostridiales(UID1226)
0262AD_0917_052_H10	1	0	1	1	1	1	1	1	2	0	1	0	0	0	0	0	0	1	2	0	Bacteroidales	o__Bacteroidales(UID2657)
0262AD_0917_052_H11	1	0	1	1	1	1	1	1	2	0	1	0	0	0	0	0	0	1	2	0	Bacteroidales	o__Bacteroidales(UID2654)
0262AD_0917_052_H12	1	0	0	0	0	0	0	1	1	0	1	0	0	0	0	0	0	0	0	1	Clostridiales	o__Clostridiales(UID1212)
0262AD_0917_052_H1	1	0	0	0	0	0	0	1	1	0	1	0	0	1	0	0	0	1	0	0	unknown	p__Actinobacteria(UID2112)
0262AD_0917_052_H2	1	0	1	1	1	1	1	1	2	0	1	0	0	0	0	0	0	1	1	0	Bacteroidales	o__Bacteroidales(UID2657)
0262AD_0917_052_H3	1	0	0	1	1	1	1	1	2	1	0	0	0	0	0	0	0	1	1	0	Bacteroidales	o__Bacteroidales(UID2621)
0262AD_0917_052_H4	0	0	0	0	1	1	1	1	1	0	1	0	0	0	0	0	0	0	0	1	Clostridiales	o__Clostridiales(UID1212)
0262AD_0917_052_H5	1	0	0	1	1	1	1	1	2	1	0	0	0	0	0	0	0	1	1	0	Bacteroidales	g__Bacteroides(UID2691)
0262AD_0917_052_H6	1	0	0	0	1	1	1	1	1	0	1	0	0	0	0	0	0	0	0	1	Clostridiales	o__Clostridiales(UID1212)
0262AD_0917_052_H7	1	0	1	1	1	1	1	1	2	0	1	0	0	0	0	0	0	1	1	0	Bacteroidales	o__Bacteroidales(UID2654)
0262AD_0917_052_H8	1	0	0	0	0	0	0	1	1	0	1	0	0	1	0	0	0	1	0	0	unknown	p__Actinobacteria(UID2112)
0262AD_0917_052_H9	1	0	1	1	1	1	1	1	2	0	1	0	0	0	0	0	0	1	1	0	Bacteroidales	o__Bacteroidales(UID2654)
0471HH_0918_059_A10	0	0	0	0	0	0	0	1	1	0	1	0	0	0	0	1	0	0	0	1	Clostridiales	f__Lachnospiraceae(UID1255)
0471HH_0918_059_A11	1	0	1	1	1	1	1	1	2	0	1	0	0	0	0	0	0	1	2	0	Bacteroidales	o__Bacteroidales(UID2657)
0471HH_0918_059_A12	1	0	0	0	0	0	0	1	0	0	0	0	0	3	1	0	1	1	0	2	Bifidobacteriales	f__Bifidobacteriaceae(UID1462)
0471HH_0918_059_A1	1	0	1	1	1	1	1	1	2	0	1	0	0	0	0	0	0	1	2	0	Bacteroidales	o__Bacteroidales(UID2657)
0471HH_0918_059_A2	1	0	0	0	0	0	0	1	0	0	0	0	0	3	1	0	1	1	0	2	Bifidobacteriales	f__Bifidobacteriaceae(UID1462)
0471HH_0918_059_A3	0	0	0	0	0	0	0	1	1	0	1	0	0	1	2	1	0	1	0	1	Clostridiales	f__Lachnospiraceae(UID1256)
0471HH_0918_059_A4	1	0	1	1	1	1	1	1	2	0	1	0	0	0	0	0	0	1	2	0	Bacteroidales	o__Bacteroidales(UID2657)
0471HH_0918_059_A5	1	0	0	0	1	1	1	1	1	0	1	0	0	0	1	1	1	0	0	1	Clostridiales	f__Lachnospiraceae(UID1256)
0471HH_0918_059_A6	2	0	1	0	1	1	1	1	1	1	0	0	0	0	0	0	0	0	0	0	Negativicutes	o__Selenomonadales(UID1024)
0471HH_0918_059_A8	1	0	1	1	1	1	1	1	2	0	2	0	0	0	0	0	0	1	0	0	Bacteroidales	o__Bacteroidales(UID2657)
0471HH_0918_059_A9	0	0	0	0	0	0	0	1	1	0	1	0	0	0	0	1	0	0	0	0	Clostridiales	o__Clostridiales(UID1212)
0471HH_0918_059_B10	1	0	0	0	0	0	0	1	1	0	1	0	0	1	0	0	0	1	0	0	unknown	p__Actinobacteria(UID2112)
0471HH_0918_059_B11	1	0	0	0	1	1	1	1	1	0	1	0	0	0	0	1	0	0	0	1	Clostridiales	f__Lachnospiraceae(UID1256)
0471HH_0918_059_B12	1	0	1	1	1	1	1	1	2	0	1	0	0	0	0	0	0	1	2	0	Bacteroidales	o__Bacteroidales(UID2657)
0471HH_0918_059_B1	0	0	0	0	0	0	0	1	1	0	1	0	0	0	0	1	0	0	0	0	Clostridiales	o__Clostridiales(UID1212)
0471HH_0918_059_B2	1	0	1	1	1	1	1	1	2	0	1	0	0	0	0	0	0	1	2	0	Bacteroidales	o__Bacteroidales(UID2657)
0471HH_0918_059_B3	0	1	1	0	1	1	1	1	1	0	1	0	0	0	0	0	0	1	0	0	Negativicutes	o__Selenomonadales(UID1024)
0471HH_0918_059_B4	1	0	0	1	1	1	1	1	2	1	0	0	0	0	0	0	0	2	1	0	Bacteroidales	g__Bacteroides(UID2691)
0471HH_0918_059_B5	1	0	1	1	1	1	1	1	2	0	1	0	0	0	0	0	0	2	1	0	Bacteroidales	o__Bacteroidales(UID2654)
0471HH_0918_059_B6	0	0	0	0	0	0	0	1	1	0	1	0	0	0	0	1	0	0	0	1	Clostridiales	o__Clostridiales(UID1226)
0471HH_0918_059_B7	0	0	0	0	0	0	0	1	1	0	1	0	0	0	0	1	0	0	0	0	Clostridiales	o__Clostridiales(UID1212)
0471HH_0918_059_B8	0	0	0	0	0	0	0	1	1	0	1	0	0	2	1	0	0	0	0	1	Clostridiales	o__Clostridiales(UID1226)
0471HH_0918_059_B9	1	0	0	0	0	0	0	1	1	0	1	0	0	1	0	1	0	1	0	1	Clostridiales	f__Lachnospiraceae(UID1256)
0471HH_0918_059_C10	1	0	0	0	1	1	1	1	1	0	1	0	0	0	0	1	0	0	0	1	Clostridiales	f__Lachnospiraceae(UID1256)
0471HH_0918_059_C11	2	0	0	1	2	0	0	1	1	0	1	0	0	0	0	1	0	0	0	1	Clostridiales	f__Lachnospiraceae(UID1286)
0471HH_0918_059_C12	0	0	0	0	0	0	0	1	1	0	1	0	0	0	0	1	0	0	0	0	Clostridiales	o__Clostridiales(UID1212)
0471HH_0918_059_C2	1	0	1	1	1	1	1	1	2	0	1	0	0	0	0	0	0	1	2	0	Bacteroidales	o__Bacteroidales(UID2657)
0471HH_0918_059_C3	0	1	1	1	1	1	0	1	1	0	1	0	0	1	0	0	0	2	0	0	unknown	c__Deltaproteobacteria(UID3218)
0471HH_0918_059_C4	1	0	1	1	1	1	1	1	2	0	1	0	0	0	0	0	0	1	1	0	Bacteroidales	o__Bacteroidales(UID2654)
0471HH_0918_059_C5	0	0	0	0	0	0	0	1	1	0	1	0	0	0	0	1	0	0	0	1	Clostridiales	f__Lachnospiraceae(UID1286)
0471HH_0918_059_C6	0	0	0	0	0	0	0	1	1	0	1	0	0	0	0	1	0	0	0	0	Clostridiales	o__Clostridiales(UID1212)
0471HH_0918_059_C7	0	0	0	0	0	0	0	1	1	0	1	0	0	0	0	1	0	0	0	0	Clostridiales	o__Clostridiales(UID1212)
0471HH_0918_059_C8	0	0	0	0	0	0	0	1	1	0	1	0	0	0	0	1	0	0	0	1	Clostridiales	f__Lachnospiraceae(UID1286)
0471HH_0918_059_C9	0	1	2	1	1	1	1	1	1	0	1	0	0	0	0	1	0	0	0	0	Negativicutes	o__Selenomonadales(UID1024)
0471HH_0918_059_D10	1	0	0	0	0	0	0	1	0	0	0	0	0	3	1	0	1	1	0	2	Bifidobacteriales	f__Bifidobacteriaceae(UID1462)
0471HH_0918_059_D11	1	0	0	0	1	0	1	1	2	0	1	0	0	0	0	0	0	1	0	0	unknown	k__Bacteria(UID2569)
0471HH_0918_059_D12	1	0	0	0	0	0	0	1	1	0	1	0	0	0	0	1	0	0	0	1	Clostridiales	f__Lachnospiraceae(UID1256)
0471HH_0918_059_D1	1	0	0	0	0	0	0	1	1	0	1	0	0	0	0	1	0	0	0	1	Clostridiales	o__Clostridiales(UID1226)
0471HH_0918_059_D2	1	0	1	1	1	1	1	1	2	0	2	0	0	0	0	0	0	1	0	0	Bacteroidales	o__Bacteroidales(UID2657)
0471HH_0918_059_D3	1	0	1	1	1	1	1	1	2	0	1	0	0	0	0	0	0	2	1	0	Bacteroidales	o__Bacteroidales(UID2654)
0471HH_0918_059_D4	1	0	0	0	0	0	0	1	1	0	1	0	0	0	0	1	0	0	0	1	Clostridiales	f__Lachnospiraceae(UID1256)
0471HH_0918_059_D5	1	0	1	1	1	1	1	1	2	0	1	0	0	0	0	0	0	1	2	0	Bacteroidales	o__Bacteroidales(UID2657)
0471HH_0918_059_D6	1	0	1	1	1	1	1	1	2	0	1	0	0	0	0	0	0	1	1	0	Bacteroidales	o__Bacteroidales(UID2654)
0471HH_0918_059_D7	1	0	1	1	1	1	1	1	2	0	1	0	0	0	0	0	0	2	1	0	Bacteroidales	o__Bacteroidales(UID2654)
0471HH_0918_059_D8	1	0	1	1	1	1	1	1	2	0	1	0	0	0	0	0	0	1	2	0	Bacteroidales	o__Bacteroidales(UID2657)
0471HH_0918_059_E10	0	0	0	0	0	0	0	1	1	0	1	0	0	0	0	1	0	0	0	0	Clostridiales	o__Clostridiales(UID1212)
0471HH_0918_059_E11	1	0	0	0	0	0	0	1	1	0	1	0	0	1	1	1	0	0	0	1	Clostridiales	o__Clostridiales(UID1226)
0471HH_0918_059_E12	1	0	0	0	0	0	0	1	1	0	1	0	0	1	1	1	0	0	0	1	Clostridiales	o__Clostridiales(UID1226)
0471HH_0918_059_E1	1	0	1	1	1	1	1	1	1	1	0	0	0	3	1	0	0	2	0	0	Enterobacterales	f__Enterobacteriaceae(UID5162)
0471HH_0918_059_E2	0	0	0	0	0	0	0	1	1	0	1	0	0	0	0	1	0	0	0	0	Clostridiales	o__Clostridiales(UID1212)
0471HH_0918_059_E3	1	0	0	0	1	1	1	1	1	0	1	0	0	1	0	1	0	1	0	1	Clostridiales	o__Clostridiales(UID1226)
0471HH_0918_059_E4	1	0	0	1	1	1	1	1	2	1	0	0	0	0	0	0	0	2	1	0	Bacteroidales	g__Bacteroides(UID2691)
0471HH_0918_059_E5	1	0	0	0	0	0	0	1	1	0	1	0	0	0	0	1	0	0	0	1	Clostridiales	f__Lachnospiraceae(UID1256)
0471HH_0918_059_E6	0	1	0	0	1	1	1	1	1	0	1	0	0	0	0	0	0	1	0	0	unknown	p__Proteobacteria(UID3887)
0471HH_0918_059_E7	0	0	0	0	0	0	0	1	1	0	1	0	0	0	0	1	0	0	0	0	Clostridiales	o__Clostridiales(UID1212)
0471HH_0918_059_E8	1	0	0	0	1	1	1	1	1	0	1	0	0	0	0	0	0	1	0	0	Clostridiales	o__Clostridiales(UID1212)
0471HH_0918_059_E9	1	0	1	1	1	1	1	1	2	0	2	0	0	0	0	0	0	1	0	0	Bacteroidales	o__Bacteroidales(UID2657)
0471HH_0918_059_F10	1	0	1	1	1	1	1	1	2	0	1	0	0	0	0	0	0	1	2	0	Bacteroidales	o__Bacteroidales(UID2657)
0471HH_0918_059_F12	1	0	0	0	0	0	0	1	1	0	1	0	0	0	0	1	0	0	0	1	Clostridiales	f__Lachnospiraceae(UID1256)
0471HH_0918_059_F1	1	0	0	0	0	0	0	1	1	0	1	0	0	1	0	0	0	1	0	0	unknown	p__Actinobacteria(UID2112)
0471HH_0918_059_F2	1	0	1	1	1	1	1	1	2	0	1	0	0	0	0	0	0	1	1	0	Bacteroidales	o__Bacteroidales(UID2654)
0471HH_0918_059_F3	1	0	0	0	0	0	0	1	1	0	1	0	0	1	0	0	0	1	0	0	unknown	p__Actinobacteria(UID2112)
0471HH_0918_059_F4	1	0	0	0	0	0	0	1	1	0	1	0	0	0	0	1	0	0	0	1	Clostridiales	f__Lachnospiraceae(UID1256)
0471HH_0918_059_F5	1	0	1	1	1	1	1	1	2	0	1	0	0	0	0	0	0	2	1	0	Bacteroidales	o__Bacteroidales(UID2654)
0471HH_0918_059_F6	1	0	0	1	1	1	1	1	2	1	0	0	0	0	0	0	0	1	1	0	Bacteroidales	g__Bacteroides(UID2691)
0471HH_0918_059_F7	1	0	1	1	1	1	1	1	2	0	1	0	0	0	0	0	0	2	1	0	Bacteroidales	o__Bacteroidales(UID2654)
0471HH_0918_059_F8	1	0	0	1	1	1	1	1	1	0	1	0	0	0	1	0	1	0	0	0	Clostridiales	o__Clostridiales(UID1120)
0471HH_0918_059_G10	1	0	0	0	0	0	0	1	1	0	1	0	0	1	0	0	0	1	0	0	unknown	p__Actinobacteria(UID2112)
0471HH_0918_059_G11	0	0	0	0	0	0	0	1	1	0	1	0	0	0	0	1	0	0	0	0	Clostridiales	o__Clostridiales(UID1212)
0471HH_0918_059_G12	1	0	1	1	1	1	1	1	2	0	1	0	0	0	0	0	0	1	2	0	Bacteroidales	o__Bacteroidales(UID2657)
0471HH_0918_059_G3	0	0	0	0	0	0	0	1	1	0	1	0	0	0	0	1	0	0	0	0	Clostridiales	o__Clostridiales(UID1212)
0471HH_0918_059_G4	1	0	1	1	1	1	1	1	2	0	2	0	0	0	0	0	0	1	0	0	Bacteroidales	o__Bacteroidales(UID2657)
0471HH_0918_059_G5	1	0	0	1	0	0	0	1	2	1	0	0	0	0	0	0	0	1	2	0	unknown	p__Bacteroidetes(UID2605)
0471HH_0918_059_G6	0	1	1	1	1	1	0	1	1	0	1	0	0	1	0	0	0	2	0	0	unknown	c__Deltaproteobacteria(UID3218)
0471HH_0918_059_G7	1	0	0	0	0	0	0	1	0	0	0	0	0	3	1	0	1	1	0	2	Bifidobacteriales	f__Bifidobacteriaceae(UID1462)
0471HH_0918_059_G8	1	0	1	1	1	1	1	1	2	0	1	0	0	0	0	0	0	1	2	0	Bacteroidales	o__Bacteroidales(UID2657)
0471HH_0918_059_G9	1	0	1	1	1	1	1	1	2	0	1	0	0	0	0	0	0	1	2	0	Bacteroidales	o__Bacteroidales(UID2654)
0471HH_0918_059_H10	1	0	0	1	1	1	1	1	2	1	0	0	0	0	0	0	0	2	1	0	Bacteroidales	g__Bacteroides(UID2691)
0471HH_0918_059_H11	0	1	1	0	1	1	1	1	1	0	1	0	0	0	0	0	0	1	0	0	Negativicutes	o__Selenomonadales(UID1024)
0471HH_0918_059_H1	0	0	0	0	0	0	0	1	1	0	1	0	0	4	0	1	0	0	0	1	Clostridiales	o__Clostridiales(UID1212)
0471HH_0918_059_H2	0	0	0	0	0	0	0	1	1	0	1	0	0	0	0	1	0	0	0	0	Clostridiales	o__Clostridiales(UID1212)
0471HH_0918_059_H3	1	0	0	0	1	1	1	1	1	0	1	0	0	0	1	1	1	0	0	1	Clostridiales	f__Lachnospiraceae(UID1256)
0471HH_0918_059_H4	0	0	0	0	0	0	0	1	1	0	1	0	0	0	0	1	0	0	0	0	Clostridiales	o__Clostridiales(UID1212)
0471HH_0918_059_H5	1	0	0	1	0	0	0	1	2	1	0	0	0	0	0	0	0	1	2	0	unknown	p__Bacteroidetes(UID2605)
0471HH_0918_059_H6	1	0	1	1	1	1	1	1	2	0	1	0	0	0	0	0	0	1	2	0	Bacteroidales	o__Bacteroidales(UID2657)
0471HH_0918_059_H7	1	0	0	0	0	0	0	1	0	0	0	0	0	2	0	0	0	2	0	1	Bifidobacteriales	f__Bifidobacteriaceae(UID1458)
0471HH_0918_059_H8	0	0	0	0	0	0	0	1	1	0	1	0	0	0	0	1	0	0	0	1	Clostridiales	o__Clostridiales(UID1226)
0471HH_0918_059_H9	1	0	0	0	0	0	0	1	1	0	1	0	0	1	1	1	0	0	0	1	Clostridiales	o__Clostridiales(UID1226)
0676ZQ_0218_001_B8	2	0	1	0	1	1	1	1	1	1	0	0	0	0	0	0	0	0	0	0	Negativicutes	Veillonella_parvula
0676ZQ_0218_001_E6	1	0	1	1	1	1	1	1	1	1	0	0	0	3	0	0	0	2	1	0	Enterobacterales	Escherichia_coli
0676ZQ_0218_001_E7	1	0	1	1	1	1	1	1	1	1	0	0	0	3	0	0	0	2	1	0	Enterobacterales	Escherichia_coli
0676ZQ_0218_001_H7	1	0	1	1	1	1	1	1	1	1	0	0	0	3	0	0	0	2	0	0	Enterobacterales	Escherichia_coli
0676ZQ_0218_011_A10	1	0	0	0	0	0	0	1	1	0	1	0	0	1	1	1	0	0	0	1	Clostridiales	Coprococcus_comes
0676ZQ_0218_011_A11	1	0	1	1	1	1	1	1	1	1	0	0	0	3	0	0	0	2	0	0	Enterobacterales	Escherichia_coli
0676ZQ_0218_011_A12	0	0	0	0	0	0	0	1	1	0	1	0	0	0	0	1	0	1	0	0	Erysipelotrichales	Catenibacterium_sp.3
0676ZQ_0218_011_A2	0	0	0	0	0	0	0	1	1	0	1	0	0	0	0	1	0	1	0	0	Erysipelotrichales	Catenibacterium_sp.3
0676ZQ_0218_011_A3	0	0	0	0	0	0	0	1	1	0	1	0	0	0	0	1	0	1	0	0	Erysipelotrichales	Catenibacterium_sp.3
0676ZQ_0218_011_A4	1	0	1	1	1	1	1	1	1	1	0	0	0	3	1	0	0	2	0	0	Enterobacterales	Escherichia_coli
0676ZQ_0218_011_A5	0	0	0	0	0	0	0	1	1	0	1	0	0	0	0	1	0	1	0	0	Erysipelotrichales	Catenibacterium_sp.3
0676ZQ_0218_011_A6	1	0	0	0	0	0	0	1	1	1	1	0	0	2	1	0	0	0	0	0	Unknown	Unknown_genus_12
0676ZQ_0218_011_A8	0	0	0	0	0	0	0	1	1	0	1	0	1	0	0	0	0	0	0	0	Unknown	Unknown_genus_40
0676ZQ_0218_011_B10	1	0	1	1	1	1	1	1	1	1	0	0	0	3	0	0	0	2	0	0	Enterobacterales	Escherichia_coli
0676ZQ_0218_011_B11	0	0	0	0	0	0	0	1	1	0	1	0	0	1	1	1	0	0	0	0	Unknown	Unknown_genus_47
0676ZQ_0218_011_B12	0	0	0	0	0	0	0	1	1	0	1	0	0	0	0	1	0	1	0	0	Erysipelotrichales	Catenibacterium_sp.3
0676ZQ_0218_011_B1	1	0	1	0	1	1	1	1	1	0	1	0	0	1	1	0	0	0	0	0	Lactobacillales	Streptococcus_infantarius
0676ZQ_0218_011_B2	1	0	0	0	0	0	0	1	1	1	1	0	0	2	1	0	0	0	0	0	Unknown	Unknown_genus_12
0676ZQ_0218_011_B3	0	0	0	0	0	0	0	1	1	0	1	0	0	1	1	1	0	0	0	0	Unknown	Unknown_genus_47
0676ZQ_0218_011_B4	1	0	1	0	1	1	1	1	1	0	1	0	0	1	1	0	0	0	0	0	Lactobacillales	Streptococcus_infantarius
0676ZQ_0218_011_B5	0	0	0	0	0	0	0	1	1	0	1	0	0	0	0	1	0	1	0	0	Erysipelotrichales	Catenibacterium_sp.3
0676ZQ_0218_011_B6	0	0	0	0	0	0	0	1	1	0	1	0	0	0	0	1	0	1	0	0	Erysipelotrichales	Catenibacterium_sp.3
0676ZQ_0218_011_B7	1	0	1	0	1	1	1	1	1	0	1	0	0	1	1	0	0	0	0	0	Lactobacillales	Streptococcus_infantarius
0676ZQ_0218_011_B8	1	0	0	0	0	0	0	1	1	0	1	0	0	0	0	0	0	1	0	0	Unknown	Unknown_genus_26
0676ZQ_0218_011_B9	0	0	0	0	0	0	0	1	1	0	1	0	0	0	0	1	0	1	0	0	Erysipelotrichales	Catenibacterium_sp.3
0676ZQ_0218_011_C10	1	0	0	0	1	1	0	1	1	0	1	0	0	1	1	0	0	0	0	0	Lactobacillales	Streptococcus_infantarius
0676ZQ_0218_011_C11	1	0	1	0	1	1	1	1	1	0	1	0	0	1	1	0	0	0	0	0	Lactobacillales	Streptococcus_infantarius
0676ZQ_0218_011_C2	1	0	0	0	0	0	0	1	1	0	1	0	0	1	1	1	0	0	0	1	Clostridiales	Coprococcus_comes
0676ZQ_0218_011_C4	1	0	1	0	1	1	1	1	1	1	0	0	0	0	0	0	0	0	0	0	Negativicutes	Veillonella_sp.2
0676ZQ_0218_011_D10	1	0	0	0	0	0	0	1	1	1	1	0	0	2	1	0	0	0	0	0	Unknown	Unknown_genus_12
0676ZQ_0218_011_D11	0	0	0	0	0	0	0	1	1	0	1	0	0	0	0	1	0	1	0	0	Erysipelotrichales	Catenibacterium_sp.3
0676ZQ_0218_011_D12	1	0	1	0	1	1	1	1	1	0	1	0	0	1	1	0	0	0	0	0	Lactobacillales	Streptococcus_infantarius
0676ZQ_0218_011_D1	1	0	1	1	1	1	1	1	1	1	0	0	0	3	1	0	0	3	0	0	Enterobacterales	Escherichia_coli
0676ZQ_0218_011_D3	1	0	1	1	1	1	1	1	1	1	0	0	0	3	0	0	0	2	0	0	Enterobacterales	Escherichia_coli
0676ZQ_0218_011_D4	1	0	1	0	1	1	1	1	1	0	1	0	0	1	1	0	0	0	0	0	Lactobacillales	Streptococcus_infantarius
0676ZQ_0218_011_D6	1	0	1	0	1	1	1	1	1	0	1	0	0	1	1	0	0	0	0	0	Lactobacillales	Streptococcus_infantarius
0676ZQ_0218_011_D8	0	0	0	0	0	0	0	1	1	0	1	0	0	0	0	1	0	1	0	0	Erysipelotrichales	Catenibacterium_sp.3
0676ZQ_0218_011_D9	0	0	0	0	0	0	0	1	1	0	1	0	0	0	0	1	0	1	0	0	Erysipelotrichales	Catenibacterium_sp.1
0676ZQ_0218_011_E10	0	0	0	0	0	0	0	1	1	0	1	0	1	0	0	0	0	0	0	0	Unknown	Unknown_genus_40
0676ZQ_0218_011_E11	0	0	0	0	0	0	0	1	1	0	1	0	0	0	0	1	0	1	0	0	Erysipelotrichales	Catenibacterium_sp.3
0676ZQ_0218_011_E12	1	0	0	0	1	1	1	1	1	0	1	0	0	0	0	0	0	1	0	0	Clostridiales	Coprococcus_eutactus
0676ZQ_0218_011_E1	1	0	0	0	0	0	0	1	1	0	1	0	0	1	1	1	0	0	0	1	Clostridiales	Coprococcus_comes
0676ZQ_0218_011_E2	1	0	1	0	1	1	1	1	1	0	1	0	0	1	1	0	0	0	0	0	Lactobacillales	Streptococcus_infantarius
0676ZQ_0218_011_E5	1	0	1	1	1	1	1	1	1	1	0	0	0	3	1	0	0	3	0	0	Enterobacterales	Escherichia_coli
0676ZQ_0218_011_E6	0	0	0	0	0	0	0	1	1	0	1	0	0	0	0	1	0	1	0	0	Erysipelotrichales	Catenibacterium_sp.3
0676ZQ_0218_011_E7	0	0	0	0	0	0	0	1	1	0	1	0	0	0	0	1	0	0	0	0	Unknown	Unknown_genus_46
0676ZQ_0218_011_E8	0	0	0	0	0	0	0	1	1	0	1	0	0	1	0	0	0	1	0	0	Coriobacteriales	Collinsella_sp.5
0676ZQ_0218_011_F10	0	0	0	0	0	0	0	1	1	0	1	0	1	0	0	0	0	0	0	0	Unknown	Unknown_genus_40
0676ZQ_0218_011_F11	1	0	0	0	1	1	1	1	1	0	1	0	0	0	0	0	0	0	0	0	Aeromonadales	Succinatimonas_sp.
0676ZQ_0218_011_F12	1	0	0	0	0	0	0	1	1	0	1	0	0	1	1	1	0	0	0	1	Clostridiales	Coprococcus_comes
0676ZQ_0218_011_F1	0	0	0	0	0	0	0	1	1	0	1	0	0	0	0	1	0	1	0	0	Erysipelotrichales	Catenibacterium_sp.3
0676ZQ_0218_011_F4	1	0	1	0	1	1	1	1	1	0	1	0	0	1	1	0	0	0	0	0	Lactobacillales	Streptococcus_infantarius
0676ZQ_0218_011_F5	1	0	1	0	1	1	1	1	1	0	1	0	0	1	1	0	0	0	0	0	Lactobacillales	Streptococcus_infantarius
0676ZQ_0218_011_F6	1	0	0	0	1	1	1	1	1	0	1	0	0	0	0	0	0	0	0	0	Aeromonadales	Succinatimonas_sp.
0676ZQ_0218_011_F7	1	0	0	0	1	1	0	1	1	0	1	0	0	1	1	0	0	0	0	0	Lactobacillales	Streptococcus_infantarius
0676ZQ_0218_011_F9	1	0	0	0	1	1	1	1	1	1	0	0	0	0	0	0	0	0	0	0	Negativicutes	Veillonella_sp.
0676ZQ_0218_011_G11	1	0	0	0	0	0	0	1	1	0	1	0	0	0	0	0	0	1	0	0	Unknown	Unknown_genus_26
0676ZQ_0218_011_G12	0	0	0	0	0	0	0	1	1	0	1	0	0	0	0	1	0	1	0	0	Erysipelotrichales	Catenibacterium_sp.3
0676ZQ_0218_011_G1	1	0	0	0	0	0	0	1	1	1	0	0	1	1	1	1	0	0	0	0	Clostridiales	Clostridium_perfringens
0676ZQ_0218_011_G2	0	0	0	0	0	0	0	1	1	0	1	0	0	0	0	1	0	0	0	0	Unknown	Unknown_genus_46
0676ZQ_0218_011_G4	1	0	0	0	1	1	1	1	1	0	1	0	0	0	0	0	0	0	0	0	Aeromonadales	Succinatimonas_sp.
0676ZQ_0218_011_G5	1	0	1	0	1	1	1	1	1	0	1	0	0	1	1	0	0	0	0	0	Lactobacillales	Streptococcus_infantarius
0676ZQ_0218_011_G6	1	0	0	0	0	0	0	1	1	0	1	0	0	1	0	0	0	1	0	0	Coriobacteriales	Collinsella_sp.10
0676ZQ_0218_011_G7	1	0	1	1	1	1	1	1	1	1	0	0	0	3	0	0	0	2	0	0	Enterobacterales	Escherichia_coli
0676ZQ_0218_011_G8	1	0	0	0	0	0	0	1	1	0	1	0	0	1	0	0	0	1	0	0	Coriobacteriales	Collinsella_sp.10
0676ZQ_0218_011_G9	0	0	0	0	0	0	0	1	1	0	1	0	0	0	0	0	0	0	0	0	Clostridiales	Eubacterium_sp.4
0676ZQ_0218_011_H10	0	0	0	0	0	0	0	1	1	0	1	0	0	0	0	1	0	0	0	0	Unknown	Unknown_genus_46
0676ZQ_0218_011_H1	1	0	0	0	1	1	0	1	1	0	1	0	0	1	1	0	0	0	0	0	Lactobacillales	Streptococcus_infantarius
0676ZQ_0218_011_H2	1	0	0	0	0	0	0	1	1	1	1	0	0	2	1	0	0	0	0	0	Unknown	Unknown_genus_12
0676ZQ_0218_011_H4	0	0	0	0	0	0	0	1	1	0	1	0	0	0	0	1	0	1	0	0	Erysipelotrichales	Catenibacterium_sp.3
0676ZQ_0218_011_H5	1	0	1	1	1	1	1	1	1	1	0	0	0	3	1	0	0	2	0	0	Enterobacterales	Escherichia_coli
0676ZQ_0218_011_H6	0	0	0	0	0	0	0	1	1	0	1	0	0	0	0	1	0	0	0	0	Unknown	Unknown_genus_46
0676ZQ_0218_011_H7	0	0	0	0	0	0	0	1	1	0	1	0	0	1	1	1	0	0	0	0	Unknown	Unknown_genus_47
0676ZQ_0218_011_H8	1	0	0	0	0	0	0	1	1	0	1	0	0	1	0	0	0	1	0	0	Coriobacteriales	Collinsella_sp.10
0676ZQ_0218_011_H9	0	0	0	0	0	0	0	1	1	0	1	0	1	0	0	0	0	0	0	0	Unknown	Unknown_genus_40
0676ZQ_0218_016_A1	1	0	0	0	1	1	1	1	2	0	1	0	0	0	0	0	0	1	0	0	Unknown	Unknown_genus_32
0676ZQ_0218_016_A2	1	0	0	0	1	1	1	1	2	0	1	0	0	0	0	0	0	1	0	0	Unknown	Unknown_genus_32
0676ZQ_0218_016_A4	1	0	0	0	1	1	1	1	2	0	1	0	0	0	0	0	0	1	0	0	Bacteroidales	Prevotella_copri
0676ZQ_0218_016_A5	1	0	0	0	1	1	1	1	2	0	1	0	0	0	0	0	0	1	0	0	Bacteroidales	Prevotella_sp.1
0676ZQ_0218_016_A6	1	0	0	1	1	1	1	1	3	0	1	0	0	0	0	0	0	1	0	0	Unknown	Unknown_genus_51
0676ZQ_0218_016_A7	1	0	0	0	1	1	1	1	2	0	1	0	0	0	0	0	0	1	0	0	Unknown	Unknown_genus_32
0676ZQ_0218_016_A8	1	0	0	1	1	1	1	1	2	0	1	0	0	0	0	0	0	0	0	0	Bacteroidales	Prevotella_sp.
0676ZQ_0218_016_A9	1	0	0	1	1	1	1	1	2	0	1	0	0	0	0	0	0	0	0	0	Bacteroidales	Prevotella_sp.
0676ZQ_0218_016_B1	1	0	0	0	1	1	1	1	2	0	1	0	0	0	0	0	0	1	0	0	Bacteroidales	Prevotella_sp.1
0676ZQ_0218_016_B2	1	0	0	0	1	1	1	1	2	0	1	0	0	0	0	0	0	1	0	0	Bacteroidales	Prevotella_sp.1
0676ZQ_0218_016_B3	1	0	0	0	1	1	1	1	2	0	1	0	0	0	0	0	0	1	0	0	Bacteroidales	Prevotella_sp.2
0676ZQ_0218_016_B4	1	0	0	0	1	1	1	1	2	0	1	0	0	0	0	0	0	1	0	0	Bacteroidales	Prevotella_sp.1
0676ZQ_0218_016_B5	1	0	0	0	1	1	1	1	2	0	1	0	0	0	0	0	0	1	0	0	Bacteroidales	Prevotella_copri
0676ZQ_0218_016_B6	1	0	0	0	1	1	1	1	2	0	1	0	0	0	0	0	0	1	0	0	Bacteroidales	Prevotella_sp.1
0676ZQ_0218_016_B7	1	0	0	1	1	1	1	1	2	0	1	0	0	0	0	0	0	1	0	0	Unknown	Unknown_genus_51
0676ZQ_0218_016_B8	1	0	0	0	1	1	1	1	2	0	1	0	0	0	0	0	0	1	0	0	Bacteroidales	Prevotella_sp.2
0676ZQ_0218_016_B9	0	0	0	1	1	1	1	1	2	0	1	0	0	0	0	0	0	0	0	0	Bacteroidales	Prevotella_sp.
0676ZQ_0218_016_C1	0	0	0	1	1	1	1	1	2	0	1	0	0	0	0	0	0	1	0	0	Unknown	Unknown_genus_51
0676ZQ_0218_016_C2	1	0	0	0	1	1	1	1	1	0	1	0	0	0	0	0	0	1	0	0	Bacteroidales	Prevotella_copri
0676ZQ_0218_016_C3	1	0	0	0	1	1	1	1	2	0	1	0	0	0	0	0	0	1	0	0	Bacteroidales	Prevotella_sp.1
0676ZQ_0218_016_C4	1	0	0	1	1	1	1	1	2	0	1	0	0	0	0	0	0	0	0	0	Bacteroidales	Prevotella_sp.
0676ZQ_0218_016_C5	0	0	0	0	1	1	1	1	2	0	1	0	0	0	0	0	0	1	0	0	Bacteroidales	Prevotella_copri
0676ZQ_0218_016_C6	1	0	0	0	1	1	1	1	2	0	1	0	0	0	0	0	0	1	0	0	Bacteroidales	Prevotella_copri
0676ZQ_0218_016_C7	1	0	0	1	1	1	1	1	2	0	1	0	0	0	0	0	0	0	0	0	Bacteroidales	Prevotella_sp.
0676ZQ_0218_016_C8	1	0	0	0	1	1	1	1	2	0	1	0	0	0	0	0	0	1	0	0	Bacteroidales	Prevotella_sp.1
0676ZQ_0218_016_C9	1	0	0	1	1	1	1	1	2	0	1	0	0	0	0	0	0	1	0	0	Unknown	Unknown_genus_51
0676ZQ_0218_016_D1	1	0	0	0	1	1	1	1	2	0	1	0	0	0	0	0	0	1	0	0	Bacteroidales	Prevotella_sp.1
0676ZQ_0218_016_D2	1	0	0	0	1	1	1	1	2	0	1	0	0	0	0	0	0	1	0	0	Bacteroidales	Prevotella_sp.1
0676ZQ_0218_016_D3	1	0	0	0	1	1	1	1	2	0	1	0	0	0	0	0	0	1	0	0	Bacteroidales	Prevotella_copri
0676ZQ_0218_016_D4	1	0	0	0	1	1	1	1	2	0	1	0	0	0	0	0	0	1	0	0	Bacteroidales	Prevotella_copri
0676ZQ_0218_016_D5	1	0	0	0	1	1	1	1	2	0	1	0	0	0	0	0	0	1	0	0	Bacteroidales	Prevotella_copri
0676ZQ_0218_016_D6	1	0	0	0	1	1	1	1	2	0	1	0	0	0	0	0	0	1	0	0	Bacteroidales	Prevotella_sp.1
0676ZQ_0218_016_D7	1	0	0	0	1	1	1	1	2	0	1	0	0	0	0	0	0	0	0	0	Bacteroidales	Prevotella_sp.4
0676ZQ_0218_016_D8	1	0	0	0	1	1	1	1	2	0	1	0	0	0	0	0	0	1	0	0	Bacteroidales	Prevotella_copri
0676ZQ_0218_016_D9	1	0	0	0	1	1	1	1	2	0	1	0	0	0	0	0	0	1	0	0	Bacteroidales	Prevotella_sp.1
0676ZQ_0218_016_E1	1	0	0	1	1	1	1	1	2	0	1	0	0	0	0	0	0	0	0	0	Bacteroidales	Prevotella_sp.
0676ZQ_0218_016_E2	1	0	0	1	1	1	1	1	2	0	1	0	0	0	0	0	0	0	0	0	Bacteroidales	Prevotella_sp.
0676ZQ_0218_016_E3	1	0	0	1	1	1	1	1	2	0	1	0	0	0	0	0	0	1	0	0	Unknown	Unknown_genus_51
0676ZQ_0218_016_E4	1	0	0	0	1	1	1	1	2	0	1	0	0	0	0	0	0	1	0	0	Bacteroidales	Prevotella_sp.2
0676ZQ_0218_016_E5	1	0	0	0	1	1	1	1	2	0	1	0	0	0	0	0	0	1	0	0	Bacteroidales	Prevotella_sp.1
0676ZQ_0218_016_E6	1	0	0	0	1	1	1	1	2	0	1	0	0	0	0	0	0	1	0	0	Bacteroidales	Prevotella_sp.1
0676ZQ_0218_016_E7	1	0	0	0	1	1	1	1	2	0	1	0	0	0	0	0	0	1	0	0	Bacteroidales	Prevotella_sp.1
0676ZQ_0218_016_E8	1	0	0	1	1	1	1	1	2	0	1	0	0	0	0	0	0	0	0	0	Bacteroidales	Prevotella_sp.
0676ZQ_0218_016_E9	1	0	0	0	1	1	1	1	2	0	1	0	0	0	0	0	0	1	0	0	Bacteroidales	Prevotella_sp.1
0676ZQ_0218_016_F1	1	0	0	0	1	1	1	1	1	0	1	0	0	0	0	0	0	1	0	0	Bacteroidales	Prevotella_sp.1
0676ZQ_0218_016_F2	0	0	0	1	1	1	1	1	2	0	1	0	0	0	0	0	0	1	0	0	Unknown	Unknown_genus_51
0676ZQ_0218_016_F3	1	0	0	0	1	1	1	1	2	0	1	0	0	0	0	0	0	0	0	0	Bacteroidales	Prevotella_sp.4
0676ZQ_0218_016_F4	1	0	0	1	1	1	1	1	2	0	1	0	0	0	0	0	0	1	0	0	Unknown	Unknown_genus_51
0676ZQ_0218_016_F5	1	0	0	0	1	1	1	1	2	0	1	0	0	0	0	0	0	1	0	0	Bacteroidales	Prevotella_copri
0676ZQ_0218_016_F6	1	0	0	0	1	1	1	1	2	0	1	0	0	0	0	0	0	1	0	0	Bacteroidales	Prevotella_sp.2
0676ZQ_0218_016_F7	1	0	0	0	1	1	1	1	2	0	1	0	0	0	0	0	0	1	0	0	Bacteroidales	Prevotella_sp.1
0676ZQ_0218_016_F8	1	0	0	0	1	1	1	1	2	0	1	0	0	0	0	0	0	1	0	0	Bacteroidales	Prevotella_sp.1
0676ZQ_0218_016_F9	1	0	0	0	1	1	1	1	2	0	1	0	0	0	0	0	0	1	0	0	Bacteroidales	Prevotella_sp.2
0676ZQ_0218_016_G1	1	0	0	0	1	1	1	1	2	0	1	0	0	0	0	0	0	1	0	0	Bacteroidales	Prevotella_sp.2
0676ZQ_0218_016_G2	1	0	0	0	1	1	1	1	2	0	1	0	0	0	0	0	0	1	0	0	Bacteroidales	Prevotella_copri
0676ZQ_0218_016_G3	0	0	0	1	1	1	1	1	2	0	1	0	0	0	0	0	0	1	0	0	Unknown	Unknown_genus_51
0676ZQ_0218_016_G4	1	0	0	0	1	1	1	1	2	0	1	0	0	0	0	0	0	1	0	0	Bacteroidales	Prevotella_copri
0676ZQ_0218_016_G5	1	0	1	1	1	1	1	1	2	0	1	0	0	0	0	0	0	1	2	0	Bacteroidales	Bacteroides_vulgatus
0676ZQ_0218_016_G6	1	0	0	0	1	1	1	1	2	0	1	0	0	0	0	0	0	1	0	0	Bacteroidales	Prevotella_copri
0676ZQ_0218_016_G7	1	0	0	0	1	1	1	1	2	0	1	0	0	0	0	0	0	1	0	0	Bacteroidales	Prevotella_sp.1
0676ZQ_0218_016_G8	1	0	0	1	1	0	1	1	2	1	0	0	0	0	0	0	0	0	0	0	Unknown	Unknown_genus_31
0676ZQ_0218_016_G9	1	0	0	0	1	1	1	1	2	0	1	0	0	0	0	0	0	1	0	0	Bacteroidales	Prevotella_sp.2
0676ZQ_0218_016_H1	1	0	0	0	1	1	1	1	2	0	1	0	0	0	0	0	0	0	0	0	Bacteroidales	Prevotella_sp.4
0676ZQ_0218_016_H2	1	0	0	0	1	1	1	1	2	0	1	0	0	0	0	0	0	1	0	0	Bacteroidales	Prevotella_sp.1
0676ZQ_0218_016_H3	1	0	0	0	1	1	1	1	2	0	1	0	0	0	0	0	0	1	0	0	Bacteroidales	Prevotella_sp.1
0676ZQ_0218_016_H4	1	0	0	0	1	1	1	1	2	0	1	0	0	0	0	0	0	1	0	0	Bacteroidales	Prevotella_copri
0676ZQ_0218_016_H5	1	0	0	1	1	1	1	1	2	0	1	0	0	0	0	0	0	1	0	0	Unknown	Unknown_genus_51
0676ZQ_0218_016_H6	1	0	0	0	1	1	1	1	2	0	1	0	0	0	0	0	0	1	0	0	Bacteroidales	Prevotella_sp.1
0676ZQ_0218_016_H7	1	0	0	0	1	1	1	1	2	0	1	0	0	0	0	0	0	1	0	0	Bacteroidales	Prevotella_sp.1
0676ZQ_0218_016_H8	1	0	0	0	1	1	1	1	2	0	1	0	0	0	0	0	0	1	0	0	Bacteroidales	Prevotella_copri
0676ZQ_0218_016_H9	1	0	0	0	1	1	1	1	2	0	1	0	0	0	0	0	0	1	0	0	Bacteroidales	Prevotella_copri
0835HD_0218_032_A10	1	0	1	1	1	1	1	1	1	1	1	0	0	4	0	0	0	2	0	0	Enterobacterales	Escherichia_coli
0835HD_0218_032_A12	1	0	0	1	1	1	1	1	2	0	1	0	0	0	0	0	0	2	2	0	Bacteroidales	Bacteroides_cellulosilyticus
0835HD_0218_032_A1	1	0	0	1	1	1	1	1	2	0	1	0	0	0	0	0	0	2	1	0	Bacteroidales	Bacteroides_cellulosilyticus
0835HD_0218_032_A2	1	0	1	1	1	1	1	1	1	1	0	0	0	3	0	0	0	2	0	0	Enterobacterales	Escherichia_coli
0835HD_0218_032_A3	0	0	1	1	1	1	1	1	1	1	0	0	0	3	0	0	0	2	0	0	Enterobacterales	Escherichia_coli
0835HD_0218_032_A4	0	1	0	1	1	1	0	1	1	1	1	0	0	0	0	0	0	0	0	0	Verrucomicrobiales	Akkermansia_muciniphila
0835HD_0218_032_A5	0	1	0	1	1	1	0	1	1	1	1	0	0	0	0	0	0	0	0	0	Verrucomicrobiales	Akkermansia_muciniphila
0835HD_0218_032_A6	1	0	0	0	1	1	1	1	2	0	1	0	0	0	0	0	0	2	2	0	Bacteroidales	Bacteroides_cellulosilyticus
0835HD_0218_032_A7	0	1	0	1	1	1	0	1	1	1	1	0	0	0	0	0	0	0	0	0	Verrucomicrobiales	Akkermansia_muciniphila
0835HD_0218_032_A8	0	1	0	1	1	1	0	1	1	1	1	0	0	0	0	0	0	0	0	0	Verrucomicrobiales	Akkermansia_muciniphila
0835HD_0218_032_A9	1	0	1	1	1	1	1	1	1	1	0	0	0	3	0	0	0	2	0	0	Enterobacterales	Escherichia_coli
0835HD_0218_032_B11	0	1	0	1	1	1	0	1	1	1	1	0	0	0	0	0	0	0	0	0	Verrucomicrobiales	Akkermansia_muciniphila
0835HD_0218_032_B12	1	0	1	1	1	1	1	1	1	1	0	0	0	3	0	0	0	2	0	0	Enterobacterales	Escherichia_coli
0835HD_0218_032_B3	1	0	1	1	1	1	1	1	1	1	0	0	0	3	0	0	0	2	0	0	Enterobacterales	Escherichia_coli
0835HD_0218_032_B4	1	0	0	1	1	1	1	1	2	1	0	0	0	0	0	0	0	1	1	0	Bacteroidales	Bacteroides_thetaiotaomicron
0835HD_0218_032_B5	1	0	0	1	1	1	1	1	2	1	0	0	0	0	0	0	0	1	1	0	Bacteroidales	Bacteroides_thetaiotaomicron
0835HD_0218_032_B6	1	0	0	1	1	1	1	1	2	0	1	0	0	0	0	0	0	2	1	0	Bacteroidales	Bacteroides_cellulosilyticus
0835HD_0218_032_B7	1	0	0	1	1	1	1	1	2	1	0	0	0	0	0	0	0	0	1	0	Bacteroidales	Parabacteroides_distasonis
0835HD_0218_032_B8	1	0	0	1	1	1	1	1	2	0	1	0	0	0	0	0	0	2	1	0	Bacteroidales	Bacteroides_cellulosilyticus
0835HD_0218_032_B9	1	0	0	1	1	1	1	1	2	1	0	0	0	0	0	0	0	1	1	0	Bacteroidales	Bacteroides_thetaiotaomicron
0835HD_0218_032_C10	0	1	0	1	1	1	0	1	1	1	1	0	0	0	0	0	0	0	0	0	Verrucomicrobiales	Akkermansia_muciniphila
0835HD_0218_032_C11	1	0	0	1	1	1	1	1	2	1	0	0	0	0	0	0	0	0	1	0	Bacteroidales	Parabacteroides_distasonis
0835HD_0218_032_C1	1	0	1	1	1	1	1	1	1	1	0	0	0	3	0	0	0	2	0	0	Enterobacterales	Escherichia_coli
0835HD_0218_032_C2	1	0	1	1	1	1	1	1	1	1	0	0	0	3	0	0	0	2	0	0	Enterobacterales	Escherichia_coli
0835HD_0218_032_C4	0	1	0	1	1	1	0	1	1	1	1	0	0	0	0	0	0	0	0	0	Verrucomicrobiales	Akkermansia_muciniphila
0835HD_0218_032_C5	1	0	0	1	1	1	1	1	2	1	0	0	0	0	0	0	0	1	1	0	Bacteroidales	Bacteroides_thetaiotaomicron
0835HD_0218_032_C6	0	0	0	1	1	1	1	1	2	1	0	0	0	0	0	0	0	1	1	0	Bacteroidales	Bacteroides_caccae
0835HD_0218_032_C7	0	1	0	1	1	1	0	1	1	1	1	0	0	0	0	0	0	0	0	0	Verrucomicrobiales	Akkermansia_muciniphila
0835HD_0218_032_C8	1	0	0	1	1	1	1	1	2	1	0	0	0	0	0	0	0	1	1	0	Bacteroidales	Bacteroides_thetaiotaomicron
0835HD_0218_032_C9	0	1	0	1	1	1	0	1	1	1	1	0	0	0	0	0	0	0	0	0	Verrucomicrobiales	Akkermansia_muciniphila
0835HD_0218_032_D10	1	0	0	1	1	1	1	1	2	1	0	0	0	0	0	0	0	0	1	0	Bacteroidales	Parabacteroides_distasonis
0835HD_0218_032_D2	0	1	0	1	1	1	0	1	1	1	1	0	0	0	0	0	0	0	0	0	Verrucomicrobiales	Akkermansia_muciniphila
0835HD_0218_032_D3	0	1	0	1	1	1	0	1	1	1	1	0	0	0	0	0	0	0	0	0	Verrucomicrobiales	Akkermansia_muciniphila
0835HD_0218_032_D4	1	0	0	1	1	1	1	1	2	1	0	0	0	0	0	0	0	0	1	0	Bacteroidales	Parabacteroides_distasonis
0835HD_0218_032_D5	0	1	0	1	1	1	0	1	1	1	1	0	0	0	0	0	0	0	0	0	Verrucomicrobiales	Akkermansia_muciniphila
0835HD_0218_032_D6	1	0	1	1	1	1	1	1	1	1	0	0	0	3	0	0	0	2	0	0	Enterobacterales	Escherichia_coli
0835HD_0218_032_D7	1	0	0	1	1	1	1	1	2	0	1	0	0	0	0	0	0	2	1	0	Bacteroidales	Bacteroides_cellulosilyticus
0835HD_0218_032_D8	1	0	0	1	1	1	1	1	2	1	0	0	0	0	0	0	0	1	1	0	Bacteroidales	Bacteroides_caccae
0835HD_0218_032_D9	1	0	0	1	1	1	1	1	2	1	0	0	0	0	0	0	0	0	1	0	Bacteroidales	Parabacteroides_distasonis
0835HD_0218_032_E10	1	0	0	1	1	1	1	1	2	1	0	0	0	0	0	0	0	0	1	0	Bacteroidales	Parabacteroides_distasonis
0835HD_0218_032_E11	0	1	0	1	1	1	0	1	1	1	1	0	0	0	0	0	0	0	0	0	Verrucomicrobiales	Akkermansia_muciniphila
0835HD_0218_032_E12	1	0	0	1	1	1	1	1	2	0	1	0	0	0	0	0	0	2	1	0	Bacteroidales	Bacteroides_cellulosilyticus
0835HD_0218_032_E1	1	0	1	1	1	1	1	1	1	1	0	0	0	3	0	0	0	1	0	0	Enterobacterales	Escherichia_coli
0835HD_0218_032_E2	0	1	0	1	1	1	0	0	1	1	1	0	0	0	0	0	0	0	0	0	Verrucomicrobiales	Akkermansia_muciniphila
0835HD_0218_032_E3	1	0	0	1	1	1	1	1	2	0	1	0	0	0	0	0	0	2	2	0	Bacteroidales	Bacteroides_cellulosilyticus
0835HD_0218_032_E4	1	0	0	1	1	1	1	1	2	0	1	0	0	0	0	0	0	2	1	0	Bacteroidales	Bacteroides_cellulosilyticus
0835HD_0218_032_E6	0	1	0	1	1	1	0	1	1	1	1	0	0	0	0	0	0	0	0	0	Verrucomicrobiales	Akkermansia_muciniphila
0835HD_0218_032_E7	0	1	0	1	1	1	0	1	1	1	1	0	0	0	0	0	0	0	0	0	Verrucomicrobiales	Akkermansia_muciniphila
0835HD_0218_032_E9	1	0	1	1	1	1	1	1	1	1	0	0	0	3	0	0	0	2	0	0	Enterobacterales	Escherichia_coli
0835HD_0218_032_F10	1	0	0	1	1	1	1	1	2	1	0	0	0	0	0	0	0	1	1	0	Bacteroidales	Bacteroides_caccae
0835HD_0218_032_F11	0	1	0	1	1	1	0	1	1	1	1	0	0	0	0	0	0	0	0	0	Verrucomicrobiales	Akkermansia_muciniphila
0835HD_0218_032_F12	1	0	0	1	1	1	1	1	2	1	0	0	0	0	0	0	0	1	1	0	Bacteroidales	Bacteroides_caccae
0835HD_0218_032_F1	1	0	0	1	1	1	1	1	2	1	0	0	0	0	0	0	0	1	1	0	Bacteroidales	Bacteroides_thetaiotaomicron
0835HD_0218_032_F2	1	0	0	1	1	1	1	1	2	1	0	0	0	0	0	0	0	0	1	0	Bacteroidales	Parabacteroides_distasonis
0835HD_0218_032_F3	0	1	0	1	1	1	0	1	1	1	1	0	0	0	0	0	0	0	0	0	Verrucomicrobiales	Akkermansia_muciniphila
0835HD_0218_032_F4	0	0	0	1	1	1	1	1	2	1	0	0	0	0	0	0	0	1	1	0	Bacteroidales	Bacteroides_thetaiotaomicron
0835HD_0218_032_F5	1	0	1	1	1	1	1	1	1	1	0	0	0	3	0	0	0	2	0	0	Enterobacterales	Escherichia_coli
0835HD_0218_032_F6	0	1	0	1	1	1	0	1	1	1	1	0	0	0	0	0	0	0	0	0	Verrucomicrobiales	Akkermansia_muciniphila
0835HD_0218_032_F7	1	0	0	1	1	1	1	1	2	1	0	0	0	0	0	0	0	1	1	0	Bacteroidales	Bacteroides_caccae
0835HD_0218_032_F8	0	1	0	1	1	1	0	1	1	1	1	0	0	0	0	0	0	0	0	0	Verrucomicrobiales	Akkermansia_muciniphila
0835HD_0218_032_F9	1	0	0	1	1	1	1	1	2	1	0	0	0	0	0	0	0	1	1	0	Bacteroidales	Bacteroides_thetaiotaomicron
0835HD_0218_032_G10	1	0	0	1	1	1	1	1	2	1	0	0	0	0	0	0	0	0	1	0	Bacteroidales	Parabacteroides_distasonis
0835HD_0218_032_G11	1	0	0	1	1	1	1	1	2	1	0	0	0	0	0	0	0	1	1	0	Bacteroidales	Bacteroides_caccae
0835HD_0218_032_G12	1	0	0	1	1	1	1	1	2	1	0	0	0	0	0	0	0	1	1	0	Bacteroidales	Bacteroides_caccae
0835HD_0218_032_G1	1	0	1	1	1	1	1	1	1	1	0	0	0	3	0	0	0	2	0	0	Enterobacterales	Escherichia_coli
0835HD_0218_032_G2	1	0	0	1	1	1	1	1	2	1	0	0	0	0	0	0	0	0	1	0	Bacteroidales	Parabacteroides_distasonis
0835HD_0218_032_G3	1	0	0	1	1	1	1	1	2	1	0	0	0	0	0	0	0	1	1	0	Bacteroidales	Bacteroides_caccae
0835HD_0218_032_G5	1	0	0	1	1	1	1	1	2	1	0	0	0	0	0	0	0	1	1	0	Bacteroidales	Bacteroides_caccae
0835HD_0218_032_G6	0	1	0	1	1	1	0	0	1	1	1	0	0	0	0	0	0	0	0	0	Verrucomicrobiales	Akkermansia_muciniphila
0835HD_0218_032_G7	0	1	0	1	1	1	0	1	1	1	1	0	0	0	0	0	0	0	0	0	Verrucomicrobiales	Akkermansia_muciniphila
0835HD_0218_032_G8	1	0	1	1	1	1	1	1	2	0	1	0	0	0	0	0	0	1	1	0	Bacteroidales	Bacteroides_vulgatus
0835HD_0218_032_G9	0	1	0	1	1	1	0	1	1	1	1	0	0	0	0	0	0	0	0	0	Verrucomicrobiales	Akkermansia_muciniphila
0835HD_0218_032_H10	1	0	0	1	1	1	1	1	2	0	1	0	0	0	0	0	0	2	1	0	Bacteroidales	Bacteroides_cellulosilyticus
0835HD_0218_032_H11	1	0	1	1	1	1	1	1	2	0	1	0	0	0	0	0	0	1	1	0	Bacteroidales	Bacteroides_vulgatus
0835HD_0218_032_H1	1	0	0	1	1	1	1	1	2	0	1	0	0	0	0	0	0	2	1	0	Bacteroidales	Bacteroides_cellulosilyticus
0835HD_0218_032_H2	1	0	0	1	1	1	1	1	2	0	1	0	0	0	0	0	0	2	1	0	Bacteroidales	Bacteroides_cellulosilyticus
0835HD_0218_032_H3	1	0	0	1	1	1	1	1	2	1	0	0	0	0	0	0	0	1	1	0	Bacteroidales	Bacteroides_thetaiotaomicron
0835HD_0218_032_H4	1	0	1	1	1	1	1	1	2	0	1	0	0	0	0	0	0	1	1	0	Bacteroidales	Bacteroides_vulgatus
0835HD_0218_032_H5	1	0	1	1	1	1	1	1	1	1	0	0	0	3	0	0	0	2	0	0	Enterobacterales	Escherichia_coli
0835HD_0218_032_H7	1	0	0	1	1	1	1	1	2	0	1	0	0	0	0	0	0	2	1	0	Bacteroidales	Bacteroides_cellulosilyticus
0835HD_0218_032_H8	1	0	0	1	1	1	1	1	2	1	0	0	0	0	0	0	0	1	1	0	Bacteroidales	Bacteroides_caccae
0835HD_0218_032_H9	1	0	0	1	1	1	1	1	2	1	0	0	0	0	0	0	0	0	1	0	Bacteroidales	Parabacteroides_distasonis
1325NM_0218_050_A10	1	0	1	1	1	1	1	1	2	0	1	0	0	0	0	0	0	1	2	0	Bacteroidales	o__Bacteroidales(UID2657)
1325NM_0218_050_A11	1	0	0	1	1	1	1	1	2	1	0	0	0	0	0	0	0	1	1	0	Bacteroidales	o__Bacteroidales(UID2621)
1325NM_0218_050_A12	1	0	0	1	1	1	1	1	2	1	0	0	0	0	0	0	0	2	1	0	Bacteroidales	g__Bacteroides(UID2691)
1325NM_0218_050_A1	0	0	0	0	0	0	0	1	1	0	1	0	0	3	0	1	0	0	0	1	Clostridiales	o__Clostridiales(UID1226)
1325NM_0218_050_A2	1	0	1	1	1	1	1	1	2	1	0	0	0	0	0	0	0	0	0	0	Bacteroidales	o__Bacteroidales(UID2657)
1325NM_0218_050_A3	1	0	2	1	1	1	1	1	1	1	1	0	0	3	0	0	0	2	0	0	Enterobacterales	f__Enterobacteriaceae(UID5124)
1325NM_0218_050_A4	1	0	0	0	0	0	0	1	1	0	1	0	0	1	0	0	0	1	0	0	unknown	p__Actinobacteria(UID2112)
1325NM_0218_050_A5	1	0	0	0	0	0	0	1	1	0	1	0	0	1	0	0	0	1	0	0	unknown	p__Actinobacteria(UID2112)
1325NM_0218_050_A6	1	0	1	1	1	1	1	1	2	0	1	0	0	0	0	0	0	1	2	0	Bacteroidales	o__Bacteroidales(UID2657)
1325NM_0218_050_A7	1	0	1	1	1	1	1	1	2	0	1	0	0	0	0	0	0	1	2	0	Bacteroidales	o__Bacteroidales(UID2657)
1325NM_0218_050_A8	1	0	0	0	0	0	0	1	1	0	1	0	0	1	0	0	0	1	0	0	unknown	p__Actinobacteria(UID2112)
1325NM_0218_050_A9	1	0	1	1	1	1	1	1	2	0	1	0	0	0	0	0	0	1	2	0	Bacteroidales	o__Bacteroidales(UID2657)
1325NM_0218_050_B10	1	0	0	1	1	1	1	1	2	0	1	0	0	0	0	0	0	2	1	0	Bacteroidales	g__Bacteroides(UID2691)
1325NM_0218_050_B11	1	0	0	0	0	0	0	1	1	0	1	0	0	1	0	0	0	1	0	0	unknown	p__Actinobacteria(UID2112)
1325NM_0218_050_B12	1	0	0	0	0	0	0	1	1	0	1	0	0	1	0	0	0	1	0	0	unknown	p__Actinobacteria(UID2112)
1325NM_0218_050_B1	0	0	0	0	0	0	0	1	1	0	1	0	0	1	0	0	0	1	0	0	unknown	p__Actinobacteria(UID2112)
1325NM_0218_050_B2	1	0	1	1	1	1	1	1	2	1	0	0	0	0	0	0	0	0	0	0	Bacteroidales	o__Bacteroidales(UID2657)
1325NM_0218_050_B3	1	0	1	1	1	1	1	1	2	1	0	0	0	0	0	0	0	0	0	0	Bacteroidales	o__Bacteroidales(UID2657)
1325NM_0218_050_B5	1	0	0	1	1	1	1	1	2	1	0	0	0	0	0	0	0	2	1	0	Bacteroidales	g__Bacteroides(UID2691)
1325NM_0218_050_B6	1	0	1	1	1	1	1	1	2	0	1	0	0	0	0	0	0	1	2	0	Bacteroidales	o__Bacteroidales(UID2657)
1325NM_0218_050_B7	1	0	0	0	0	0	0	1	1	0	1	0	0	1	0	0	0	1	0	0	unknown	p__Actinobacteria(UID2112)
1325NM_0218_050_B8	1	0	0	0	0	0	0	1	1	0	1	0	0	1	0	0	0	1	0	0	unknown	p__Actinobacteria(UID2112)
1325NM_0218_050_B9	1	0	1	1	1	1	1	1	2	0	1	0	0	0	0	0	0	1	2	0	Bacteroidales	o__Bacteroidales(UID2657)
1325NM_0218_050_C10	0	1	1	0	1	1	1	1	1	0	1	0	0	1	0	0	0	0	0	0	Negativicutes	o__Selenomonadales(UID1024)
1325NM_0218_050_C11	1	0	0	1	1	1	1	1	2	1	0	0	0	0	0	0	0	2	1	0	Bacteroidales	g__Bacteroides(UID2691)
1325NM_0218_050_C1	1	0	0	0	0	0	0	1	1	0	1	0	0	1	0	0	0	1	0	0	unknown	p__Actinobacteria(UID2112)
1325NM_0218_050_C2	1	0	0	1	1	1	1	1	2	1	0	0	0	0	0	0	0	2	1	0	Bacteroidales	g__Bacteroides(UID2691)
1325NM_0218_050_C3	1	0	1	1	1	1	1	1	2	1	0	0	0	0	0	0	0	0	0	0	Bacteroidales	o__Bacteroidales(UID2657)
1325NM_0218_050_C4	1	0	0	1	1	1	1	1	2	1	0	0	0	0	0	0	0	2	1	0	Bacteroidales	g__Bacteroides(UID2691)
1325NM_0218_050_C6	1	0	0	0	0	0	0	1	1	0	1	0	0	1	0	0	0	1	0	0	unknown	p__Actinobacteria(UID2112)
1325NM_0218_050_C7	0	0	0	0	0	0	0	0	0	0	0	0	0	0	0	0	0	0	0	0	unknown	p__Actinobacteria(UID2112)
1325NM_0218_050_C8	0	1	0	0	1	1	1	1	1	0	1	0	0	1	0	0	0	2	0	0	unknown	p__Proteobacteria(UID3887)
1325NM_0218_050_C9	1	0	0	0	0	0	0	1	1	0	1	0	0	1	1	1	0	0	0	1	Clostridiales	o__Clostridiales(UID1226)
1325NM_0218_050_D11	1	0	0	0	0	0	0	1	1	0	1	0	0	1	0	0	0	1	0	0	unknown	p__Actinobacteria(UID2112)
1325NM_0218_050_D12	1	0	0	1	1	1	1	1	2	1	0	0	0	0	0	0	0	2	1	0	Bacteroidales	g__Bacteroides(UID2691)
1325NM_0218_050_D1	1	0	1	1	1	1	1	1	2	0	1	0	0	0	0	0	0	1	2	0	Bacteroidales	o__Bacteroidales(UID2657)
1325NM_0218_050_D3	1	0	0	0	0	0	0	1	1	0	1	0	0	1	0	0	0	1	0	0	unknown	p__Actinobacteria(UID2112)
1325NM_0218_050_D4	1	0	1	1	1	1	1	1	2	0	1	0	0	0	0	0	0	1	2	0	Bacteroidales	o__Bacteroidales(UID2657)
1325NM_0218_050_D5	0	1	1	0	1	1	1	1	1	0	1	0	0	1	0	0	0	0	0	0	Negativicutes	o__Selenomonadales(UID1024)
1325NM_0218_050_D6	1	0	2	1	1	1	1	1	1	1	1	0	0	3	0	0	0	2	0	0	Enterobacterales	f__Enterobacteriaceae(UID5124)
1325NM_0218_050_D7	1	0	0	0	1	1	1	1	2	0	1	0	0	0	0	0	0	1	1	0	Bacteroidales	g__Bacteroides(UID2691)
1325NM_0218_050_D8	1	0	1	1	1	1	1	1	2	0	1	0	0	0	0	0	0	1	2	0	Bacteroidales	o__Bacteroidales(UID2657)
1325NM_0218_050_D9	1	0	1	1	1	1	1	1	2	0	1	0	0	0	0	0	0	1	2	0	Bacteroidales	o__Bacteroidales(UID2657)
1325NM_0218_050_E10	1	0	0	0	0	0	0	1	1	0	1	0	0	1	0	0	0	1	0	0	unknown	p__Actinobacteria(UID2112)
1325NM_0218_050_E11	1	0	0	1	1	1	1	1	2	1	0	0	0	0	0	0	0	0	1	0	Bacteroidales	o__Bacteroidales(UID2657)
1325NM_0218_050_E12	1	0	0	0	0	0	0	1	1	0	1	0	0	1	1	0	0	0	0	1	Clostridiales	o__Clostridiales(UID1226)
1325NM_0218_050_E1	1	0	0	0	0	0	0	1	1	0	1	0	0	1	0	0	0	1	0	0	unknown	p__Actinobacteria(UID2112)
1325NM_0218_050_E3	1	0	1	1	0	1	1	1	2	0	1	0	0	0	0	0	0	1	2	0	Bacteroidales	o__Bacteroidales(UID2657)
1325NM_0218_050_E4	1	0	1	1	1	1	1	1	2	0	1	0	0	0	0	0	0	1	2	0	Bacteroidales	o__Bacteroidales(UID2654)
1325NM_0218_050_E5	1	0	0	0	0	0	0	1	1	0	1	0	0	1	0	0	0	1	0	0	unknown	p__Actinobacteria(UID2112)
1325NM_0218_050_E6	0	0	0	1	1	1	1	1	2	1	0	0	0	0	0	0	0	2	1	0	Bacteroidales	g__Bacteroides(UID2691)
1325NM_0218_050_E7	0	0	0	0	0	0	0	1	1	0	1	0	0	2	0	1	0	0	0	1	Clostridiales	o__Clostridiales(UID1226)
1325NM_0218_050_E8	0	0	0	0	0	0	0	1	1	0	1	0	1	1	1	1	1	0	0	1	Clostridiales	o__Clostridiales(UID1226)
1325NM_0218_050_E9	1	0	1	1	1	1	1	1	2	1	0	0	0	0	0	0	0	0	0	0	Bacteroidales	o__Bacteroidales(UID2657)
1325NM_0218_050_F11	1	0	1	1	1	1	1	1	2	0	1	0	0	0	0	0	0	1	2	0	Bacteroidales	o__Bacteroidales(UID2657)
1325NM_0218_050_F12	1	0	1	1	1	1	1	1	2	1	0	0	0	0	0	0	0	1	1	0	Bacteroidales	o__Bacteroidales(UID2621)
1325NM_0218_050_F1	0	0	0	0	0	0	0	1	1	0	1	0	0	7	1	1	1	0	0	1	Clostridiales	o__Clostridiales(UID1226)
1325NM_0218_050_F2	1	0	0	0	0	0	0	1	1	0	1	0	0	1	0	0	0	1	0	0	unknown	p__Actinobacteria(UID2112)
1325NM_0218_050_F3	1	0	0	0	1	0	1	1	2	0	1	0	0	0	0	0	0	1	0	0	unknown	k__Bacteria(UID2569)
1325NM_0218_050_F4	0	1	1	0	1	1	1	1	1	0	1	0	0	1	0	0	0	0	0	0	Negativicutes	o__Selenomonadales(UID1024)
1325NM_0218_050_F5	1	0	1	1	1	1	1	1	2	0	1	0	0	0	0	0	0	1	2	0	Bacteroidales	o__Bacteroidales(UID2657)
1325NM_0218_050_F6	1	0	0	0	0	0	0	1	1	0	1	0	0	1	1	1	0	0	0	1	Clostridiales	o__Clostridiales(UID1226)
1325NM_0218_050_F7	1	0	0	0	0	0	0	1	1	0	1	0	0	2	0	1	0	1	0	1	Clostridiales	f__Lachnospiraceae(UID1256)
1325NM_0218_050_F8	1	0	0	0	0	0	0	1	1	0	1	0	0	1	0	0	0	1	0	0	unknown	p__Actinobacteria(UID2112)
1325NM_0218_050_F9	1	0	1	1	1	1	1	1	2	0	1	0	0	0	0	0	0	1	2	0	Bacteroidales	o__Bacteroidales(UID2657)
1325NM_0218_050_G10	1	0	0	0	0	0	0	1	1	0	1	0	0	1	0	0	0	1	0	0	unknown	p__Actinobacteria(UID2112)
1325NM_0218_050_G11	1	0	0	0	0	0	0	1	1	0	1	0	0	1	1	0	0	0	0	1	Clostridiales	o__Clostridiales(UID1226)
1325NM_0218_050_G12	1	0	1	1	1	1	1	1	2	0	1	0	0	0	0	0	0	1	2	0	Bacteroidales	o__Bacteroidales(UID2657)
1325NM_0218_050_G2	1	0	0	1	1	1	1	1	2	1	0	0	0	0	0	0	0	2	1	0	Bacteroidales	g__Bacteroides(UID2691)
1325NM_0218_050_G3	1	0	0	0	0	0	0	1	1	0	1	0	0	1	1	1	0	0	0	1	Clostridiales	o__Clostridiales(UID1226)
1325NM_0218_050_G4	1	0	0	0	0	0	0	1	1	0	1	0	0	1	1	1	0	0	0	1	Clostridiales	o__Clostridiales(UID1226)
1325NM_0218_050_G5	1	0	1	1	1	1	1	1	2	1	0	0	0	0	0	0	0	0	0	0	Bacteroidales	o__Bacteroidales(UID2657)
1325NM_0218_050_G6	1	0	0	1	1	1	1	1	2	1	0	0	0	0	0	0	0	2	1	0	Bacteroidales	g__Bacteroides(UID2691)
1325NM_0218_050_G7	1	0	1	1	1	1	1	1	2	1	0	0	0	0	0	0	0	0	0	0	Bacteroidales	o__Bacteroidales(UID2657)
1325NM_0218_050_G8	1	0	1	1	1	1	1	1	2	0	1	0	0	0	0	0	0	1	2	0	Bacteroidales	o__Bacteroidales(UID2657)
1325NM_0218_050_G9	1	0	0	0	0	0	0	1	1	0	1	0	0	1	0	0	0	1	0	0	unknown	p__Actinobacteria(UID2112)
1325NM_0218_050_H10	1	0	1	1	1	1	1	1	1	1	0	0	0	3	0	0	0	3	0	0	Enterobacterales	f__Enterobacteriaceae(UID5124)
1325NM_0218_050_H11	2	0	1	2	1	1	1	1	2	1	0	0	0	0	0	0	0	0	1	0	Bacteroidales	o__Bacteroidales(UID2621)
1325NM_0218_050_H12	1	0	0	0	0	0	0	1	1	0	1	0	0	1	0	0	0	1	0	0	unknown	p__Actinobacteria(UID2112)
1325NM_0218_050_H1	1	0	0	0	0	0	0	1	1	0	1	0	0	1	0	0	0	1	0	0	unknown	p__Actinobacteria(UID2112)
1325NM_0218_050_H2	1	0	0	0	0	0	0	1	1	0	1	0	0	1	1	1	0	0	0	1	Clostridiales	o__Clostridiales(UID1226)
1325NM_0218_050_H3	1	0	0	0	0	0	0	1	1	0	1	0	0	1	0	0	0	1	0	0	unknown	p__Actinobacteria(UID2112)
1325NM_0218_050_H4	1	0	0	1	1	1	1	1	1	0	1	0	0	0	0	1	0	0	0	1	unknown	k__Bacteria(UID2372)
1325NM_0218_050_H5	1	0	1	1	1	1	1	1	2	0	1	0	0	0	0	0	0	1	2	0	Bacteroidales	o__Bacteroidales(UID2657)
1325NM_0218_050_H6	1	0	0	0	0	0	0	1	1	0	1	0	0	1	0	0	0	1	0	0	unknown	p__Actinobacteria(UID2112)
1325NM_0218_050_H7	1	0	0	0	1	1	1	1	2	0	1	0	0	0	0	0	0	1	0	0	Bacteroidales	g__Prevotella(UID2724)
1325NM_0218_050_H8	1	0	0	0	1	0	1	1	2	0	1	0	0	0	0	0	0	1	0	0	unknown	k__Bacteria(UID2569)
1325NM_0218_050_H9	1	0	1	1	1	1	1	1	2	0	1	0	0	0	0	0	0	1	2	0	Bacteroidales	o__Bacteroidales(UID2657)
1362NZ_0917_004_A10	1	0	1	1	1	1	1	1	1	1	0	0	0	3	1	0	0	2	1	0	Enterobacterales	Escherichia_coli
1362NZ_0917_004_A11	0	0	0	0	0	0	0	1	0	0	0	0	0	3	0	0	0	1	0	2	Bifidobacteriales	Bifidobacterium_animalis
1362NZ_0917_004_A12	1	0	0	0	0	0	0	1	0	0	0	0	0	2	0	0	0	2	0	1	Bifidobacteriales	Bifidobacterium_adolescentis
1362NZ_0917_004_A1	1	0	0	0	0	0	0	1	0	0	0	0	0	2	0	0	0	2	0	1	Bifidobacteriales	Bifidobacterium_adolescentis
1362NZ_0917_004_A2	1	0	1	1	1	1	1	1	1	1	0	0	0	3	1	0	0	2	1	0	Enterobacterales	Escherichia_coli
1362NZ_0917_004_A4	1	0	1	1	1	1	1	1	1	1	0	0	0	3	0	0	0	2	0	0	Enterobacterales	Escherichia_coli
1362NZ_0917_004_A7	1	0	1	1	1	1	1	1	2	0	1	0	0	0	0	0	0	1	2	0	Bacteroidales	Bacteroides_uniformis
1362NZ_0917_004_A8	1	0	0	0	0	0	0	1	0	0	0	0	0	2	0	0	0	2	0	1	Bifidobacteriales	Bifidobacterium_adolescentis
1362NZ_0917_004_A9	1	0	0	0	0	0	0	1	0	0	0	0	0	2	0	0	0	2	0	1	Bifidobacteriales	Bifidobacterium_adolescentis
1362NZ_0917_004_B10	0	0	0	0	0	0	0	1	0	0	0	0	0	3	0	0	0	1	0	2	Bifidobacteriales	Bifidobacterium_animalis
1362NZ_0917_004_B12	0	0	0	0	0	0	0	1	0	0	0	0	0	3	0	0	0	1	0	2	Bifidobacteriales	Bifidobacterium_animalis
1362NZ_0917_004_B1	1	0	0	0	0	0	0	1	0	0	0	0	0	2	0	0	0	2	0	1	Bifidobacteriales	Bifidobacterium_adolescentis
1362NZ_0917_004_B2	1	0	0	0	0	0	0	1	0	0	0	0	0	2	0	0	0	2	0	1	Bifidobacteriales	Bifidobacterium_adolescentis
1362NZ_0917_004_B3	0	0	0	0	0	0	0	1	0	0	0	0	0	3	0	0	0	1	0	2	Bifidobacteriales	Bifidobacterium_animalis
1362NZ_0917_004_B4	1	0	0	0	0	0	0	1	0	0	0	0	0	2	0	0	0	2	0	1	Bifidobacteriales	Bifidobacterium_adolescentis
1362NZ_0917_004_B5	1	0	0	0	0	0	0	1	0	0	0	0	0	2	0	0	0	2	0	1	Bifidobacteriales	Bifidobacterium_adolescentis
1362NZ_0917_004_B6	1	0	1	1	1	1	1	1	1	1	0	0	0	3	0	0	0	2	0	0	Enterobacterales	Escherichia_coli
1362NZ_0917_004_B8	1	0	0	0	1	1	1	1	1	0	1	0	0	0	0	0	0	0	0	0	Clostridiales	Anaerostipes_hadrus
1362NZ_0917_004_C10	1	0	0	0	0	0	0	1	0	0	0	0	0	2	0	0	0	2	0	1	Bifidobacteriales	Bifidobacterium_adolescentis
1362NZ_0917_004_C11	1	0	0	0	0	0	0	1	0	0	0	0	0	2	0	0	0	2	0	1	Bifidobacteriales	Bifidobacterium_adolescentis
1362NZ_0917_004_C12	1	0	0	0	0	0	0	1	0	0	0	0	0	2	0	0	0	2	0	1	Bifidobacteriales	Bifidobacterium_adolescentis
1362NZ_0917_004_C1	1	0	0	0	0	0	0	1	0	0	0	0	0	2	0	0	0	2	0	1	Bifidobacteriales	Bifidobacterium_adolescentis
1362NZ_0917_004_C3	1	0	1	1	1	1	1	1	1	1	0	0	0	3	0	0	0	2	0	0	Enterobacterales	Escherichia_coli
1362NZ_0917_004_C4	1	0	0	0	0	0	0	1	0	0	0	0	0	2	0	0	0	2	0	1	Bifidobacteriales	Bifidobacterium_adolescentis
1362NZ_0917_004_C5	1	0	1	1	1	1	1	1	2	0	1	0	0	0	0	0	0	1	1	0	Bacteroidales	Bacteroides_vulgatus
1362NZ_0917_004_C6	1	0	0	0	0	0	0	1	0	0	0	0	0	2	0	0	0	2	0	1	Bifidobacteriales	Bifidobacterium_adolescentis
1362NZ_0917_004_C9	1	0	0	0	0	0	0	1	0	0	0	0	0	2	0	0	0	2	0	1	Bifidobacteriales	Bifidobacterium_adolescentis
1362NZ_0917_004_D11	0	0	1	1	1	1	1	1	1	1	0	0	0	3	0	0	0	2	0	0	Enterobacterales	Escherichia_coli
1362NZ_0917_004_D1	1	0	1	1	1	1	1	1	1	1	0	0	0	3	0	0	0	2	0	0	Enterobacterales	Escherichia_coli
1362NZ_0917_004_D2	1	0	0	0	0	0	0	1	1	1	1	0	0	1	2	1	1	0	0	1	Clostridiales	Dorea_longicatena
1362NZ_0917_004_D3	1	0	0	0	0	0	0	1	0	0	0	0	0	2	0	0	0	2	0	1	Bifidobacteriales	Bifidobacterium_adolescentis
1362NZ_0917_004_D4	1	0	1	1	1	1	1	1	2	0	1	0	0	0	0	0	0	1	2	0	Bacteroidales	Bacteroides_uniformis
1362NZ_0917_004_D5	1	0	0	0	0	0	0	1	0	0	0	0	0	2	0	0	0	2	0	1	Bifidobacteriales	Bifidobacterium_adolescentis
1362NZ_0917_004_D6	0	0	0	0	0	0	0	1	0	0	0	0	0	3	0	0	0	1	0	2	Bifidobacteriales	Bifidobacterium_animalis
1362NZ_0917_004_D7	1	0	0	0	0	0	0	1	0	0	0	0	0	2	0	0	0	2	0	1	Bifidobacteriales	Bifidobacterium_adolescentis
1362NZ_0917_004_D8	1	0	1	1	1	1	1	1	1	1	0	0	0	3	0	0	0	2	0	0	Enterobacterales	Escherichia_coli
1362NZ_0917_004_D9	1	0	1	1	1	1	1	1	1	1	0	0	0	3	0	0	0	2	0	0	Enterobacterales	Escherichia_coli
1362NZ_0917_004_E10	0	0	0	0	0	0	0	1	0	0	0	0	0	3	0	0	0	1	0	2	Bifidobacteriales	Bifidobacterium_animalis
1362NZ_0917_004_E11	1	0	0	0	0	0	0	1	0	0	0	0	0	2	0	0	0	2	0	1	Bifidobacteriales	Bifidobacterium_adolescentis
1362NZ_0917_004_E12	1	0	0	0	0	0	0	1	0	0	0	0	0	2	0	0	0	2	0	1	Bifidobacteriales	Bifidobacterium_adolescentis
1362NZ_0917_004_E1	1	0	0	0	0	0	0	1	1	0	1	0	0	1	1	0	0	0	0	1	Clostridiales	Blautia_obeum
1362NZ_0917_004_E2	1	0	1	1	1	1	1	1	1	1	0	0	0	3	0	0	0	2	0	0	Enterobacterales	Escherichia_coli
1362NZ_0917_004_E3	0	0	0	0	0	0	0	1	0	0	0	0	0	3	0	0	0	1	0	2	Bifidobacteriales	Bifidobacterium_animalis
1362NZ_0917_004_E4	1	0	1	1	1	1	1	1	1	1	0	0	0	4	0	0	0	2	0	0	Enterobacterales	Escherichia_coli
1362NZ_0917_004_E5	0	0	0	0	0	0	0	1	0	0	0	0	0	3	0	0	0	1	0	2	Bifidobacteriales	Bifidobacterium_animalis
1362NZ_0917_004_E6	1	0	1	1	1	1	1	1	1	1	0	0	0	3	0	0	0	2	0	0	Enterobacterales	Escherichia_coli
1362NZ_0917_004_E7	1	0	1	1	1	1	1	1	1	1	0	0	0	3	0	0	0	2	0	0	Enterobacterales	Escherichia_coli
1362NZ_0917_004_E8	1	0	0	0	0	0	0	1	0	0	0	0	0	2	0	0	0	2	0	1	Bifidobacteriales	Bifidobacterium_adolescentis
1362NZ_0917_004_E9	0	0	0	0	0	0	0	1	0	0	0	0	0	3	0	0	0	1	0	2	Bifidobacteriales	Bifidobacterium_animalis
1362NZ_0917_004_F12	1	0	0	0	0	0	0	1	0	0	0	0	0	2	0	0	0	2	0	1	Bifidobacteriales	Bifidobacterium_adolescentis
1362NZ_0917_004_F2	1	0	1	1	1	1	1	1	1	1	0	0	0	3	0	0	0	2	0	0	Enterobacterales	Escherichia_coli
1362NZ_0917_004_F3	1	0	0	0	0	0	0	1	0	0	0	0	0	2	0	0	0	2	0	1	Bifidobacteriales	Bifidobacterium_adolescentis
1362NZ_0917_004_F4	1	0	1	1	1	1	1	1	1	1	0	0	0	3	0	0	0	2	0	0	Enterobacterales	Escherichia_coli
1362NZ_0917_004_F5	1	0	1	1	1	1	1	1	1	1	0	0	0	3	0	0	0	2	0	0	Enterobacterales	Escherichia_coli
1362NZ_0917_004_F6	0	0	0	0	0	0	0	1	0	0	0	0	0	3	0	0	0	1	0	2	Bifidobacteriales	Bifidobacterium_animalis
1362NZ_0917_004_F7	1	0	0	0	0	0	0	1	0	0	0	0	0	2	0	0	0	2	0	1	Bifidobacteriales	Bifidobacterium_adolescentis
1362NZ_0917_004_F8	1	0	0	0	0	0	0	1	0	0	0	0	0	2	0	0	0	2	0	1	Bifidobacteriales	Bifidobacterium_adolescentis
1362NZ_0917_004_F9	1	0	1	1	1	1	1	1	1	1	0	0	0	3	1	0	0	2	1	0	Enterobacterales	Escherichia_coli
1362NZ_0917_004_G10	1	0	0	0	0	0	0	1	0	0	0	0	0	2	0	0	0	2	0	1	Bifidobacteriales	Bifidobacterium_adolescentis
1362NZ_0917_004_G11	1	0	1	1	1	1	1	1	1	1	0	0	0	3	0	0	0	2	0	0	Enterobacterales	Escherichia_coli
1362NZ_0917_004_G12	0	0	0	0	0	0	0	1	0	0	0	0	0	3	0	0	0	1	0	2	Bifidobacteriales	Bifidobacterium_animalis
1362NZ_0917_004_G1	1	0	1	1	1	1	1	1	1	1	0	0	0	3	0	0	0	2	0	0	Enterobacterales	Escherichia_coli
1362NZ_0917_004_G2	1	0	1	1	1	1	1	1	2	0	1	0	0	0	0	0	0	1	1	0	Bacteroidales	Bacteroides_vulgatus
1362NZ_0917_004_G3	0	0	0	0	0	0	0	1	0	0	0	0	0	3	0	0	0	1	0	2	Bifidobacteriales	Bifidobacterium_animalis
1362NZ_0917_004_G4	0	0	0	0	0	0	0	1	0	0	0	0	0	3	0	0	0	1	0	2	Bifidobacteriales	Bifidobacterium_animalis
1362NZ_0917_004_G5	0	0	0	0	0	0	0	1	0	0	0	0	0	3	0	0	0	1	0	2	Bifidobacteriales	Bifidobacterium_animalis
1362NZ_0917_004_G7	1	0	0	0	0	0	0	1	0	0	0	0	0	2	0	0	0	2	0	1	Bifidobacteriales	Bifidobacterium_adolescentis
1362NZ_0917_004_G8	1	0	0	0	0	0	0	1	0	0	0	0	0	2	0	0	0	2	0	1	Bifidobacteriales	Bifidobacterium_adolescentis
1362NZ_0917_004_G9	0	0	0	0	0	0	0	1	0	0	0	0	0	3	0	0	0	1	0	2	Bifidobacteriales	Bifidobacterium_animalis
1362NZ_0917_004_H10	1	0	0	0	0	0	0	1	0	0	0	0	0	2	0	0	0	2	0	1	Bifidobacteriales	Bifidobacterium_adolescentis
1362NZ_0917_004_H11	1	0	1	1	1	1	1	1	1	1	0	0	0	3	0	0	0	2	0	0	Enterobacterales	Escherichia_coli
1362NZ_0917_004_H1	1	0	1	1	1	1	1	1	1	1	0	0	0	3	0	0	0	2	0	0	Enterobacterales	Escherichia_coli
1362NZ_0917_004_H2	1	0	1	1	1	1	1	1	1	1	0	0	0	3	0	0	0	2	0	0	Enterobacterales	Escherichia_coli
1362NZ_0917_004_H3	1	0	0	0	0	0	0	1	0	0	0	0	0	2	0	0	0	2	0	1	Bifidobacteriales	Bifidobacterium_adolescentis
1362NZ_0917_004_H4	1	0	0	0	0	0	0	1	0	0	0	0	0	2	0	0	0	2	0	1	Bifidobacteriales	Bifidobacterium_adolescentis
1362NZ_0917_004_H5	1	0	0	0	0	0	0	1	0	0	0	0	0	2	0	0	0	2	0	1	Bifidobacteriales	Bifidobacterium_adolescentis
1362NZ_0917_004_H6	0	0	0	0	0	0	0	1	0	0	0	0	0	3	0	0	0	1	0	2	Bifidobacteriales	Bifidobacterium_animalis
1362NZ_0917_004_H7	2	0	0	2	1	0	0	1	2	1	0	0	0	0	0	0	0	1	1	0	Bacteroidales	Alistipes_onderdonkii
1362NZ_0917_004_H8	1	0	0	0	1	1	1	1	1	0	1	0	0	0	0	0	0	0	0	0	Clostridiales	Anaerostipes_hadrus
1362NZ_0917_004_H9	1	0	1	1	1	1	1	1	1	1	0	0	0	3	0	0	0	2	0	0	Enterobacterales	Escherichia_coli
1462YY_0218_030_A10	1	0	1	1	1	1	1	1	1	1	0	0	0	3	0	0	0	2	1	0	Enterobacterales	Escherichia_coli
1462YY_0218_030_A11	1	0	0	0	0	0	0	1	1	1	0	0	1	1	1	1	0	0	0	0	Clostridiales	Clostridium_perfringens
1462YY_0218_030_A12	1	0	0	0	0	0	0	1	1	1	0	0	1	1	1	1	0	0	0	0	Clostridiales	Clostridium_perfringens
1462YY_0218_030_A4	0	0	0	0	0	0	0	1	1	0	1	0	0	1	0	1	0	0	0	0	Unknown	Unknown_genus_43
1462YY_0218_030_A6	2	0	0	1	1	0	0	1	1	0	1	0	0	0	0	1	0	0	0	1	Clostridiales	Coprococcus_comes
1462YY_0218_030_A7	1	0	0	0	0	0	0	1	1	0	1	0	0	1	1	1	0	0	0	1	Clostridiales	Coprococcus_comes
1462YY_0218_030_A8	1	0	1	1	1	1	1	1	1	1	0	0	0	3	0	0	0	2	0	0	Enterobacterales	Escherichia_coli
1462YY_0218_030_B10	1	0	0	1	1	1	1	1	2	0	1	0	0	0	0	0	0	0	0	0	Bacteroidales	Prevotella_sp.
1462YY_0218_030_B11	1	0	0	0	0	0	0	1	1	1	0	0	1	1	1	1	0	0	0	0	Clostridiales	Clostridium_perfringens
1462YY_0218_030_B12	1	0	0	0	0	0	0	1	1	1	0	0	1	1	1	1	0	0	0	0	Clostridiales	Clostridium_perfringens
1462YY_0218_030_B1	1	0	0	0	0	0	0	1	1	0	1	0	0	1	0	0	0	1	0	0	Coriobacteriales	Collinsella_sp.9
1462YY_0218_030_B2	1	0	0	0	1	1	1	1	2	0	1	0	0	0	0	0	0	1	0	0	Bacteroidales	Prevotella_copri
1462YY_0218_030_B3	1	0	1	1	1	1	1	1	1	1	0	0	0	3	0	0	0	2	0	0	Enterobacterales	Escherichia_coli
1462YY_0218_030_B4	0	0	1	1	1	1	1	1	1	1	0	0	0	3	0	0	0	2	0	0	Enterobacterales	Escherichia_coli
1462YY_0218_030_B5	1	0	2	1	1	1	1	1	1	1	0	0	0	3	0	0	0	2	0	0	Enterobacterales	Escherichia_coli
1462YY_0218_030_B6	1	0	0	1	1	1	1	1	2	0	1	0	0	0	0	0	0	0	0	0	Unknown	Unknown_genus_29
1462YY_0218_030_B8	1	0	0	1	1	1	1	1	2	0	1	0	0	0	0	0	0	1	0	0	Unknown	Unknown_genus_51
1462YY_0218_030_B9	1	0	0	1	1	1	1	1	2	0	1	0	0	0	0	0	0	0	0	0	Bacteroidales	Prevotella_sp.
1462YY_0218_030_C11	1	0	0	0	0	0	0	1	1	1	0	0	1	1	1	1	0	0	0	0	Clostridiales	Clostridium_perfringens
1462YY_0218_030_C12	1	0	0	0	0	0	0	1	1	1	0	0	1	1	1	1	0	0	0	0	Clostridiales	Clostridium_perfringens
1462YY_0218_030_C1	1	0	0	0	1	1	0	1	1	0	1	0	0	1	1	0	0	0	0	0	Lactobacillales	Streptococcus_infantarius
1462YY_0218_030_C2	0	0	0	0	1	1	1	1	1	0	1	0	0	0	0	0	0	0	0	1	Clostridiales	Butyricicoccus_sp.
1462YY_0218_030_C3	1	0	0	0	1	1	0	1	1	0	1	0	0	1	1	0	0	0	0	0	Lactobacillales	Streptococcus_infantarius
1462YY_0218_030_C4	1	0	0	0	0	0	0	1	1	0	1	0	0	1	0	0	0	1	0	0	Coriobacteriales	Collinsella_sp.9
1462YY_0218_030_C5	0	0	0	0	0	0	0	1	1	0	1	0	0	1	0	0	0	0	0	0	Clostridiales	Eubacterium_rectale
1462YY_0218_030_C6	1	0	0	0	0	0	0	1	1	0	1	0	0	0	0	0	0	0	0	1	Unknown	Unknown_genus_35
1462YY_0218_030_C7	1	0	0	1	1	1	1	1	2	1	0	0	0	0	0	0	0	2	1	0	Bacteroidales	Bacteroides_caccae
1462YY_0218_030_C8	1	0	0	0	0	0	0	1	1	0	1	0	0	2	1	1	0	1	0	1	Clostridiales	Ruminococcus_sp.2
1462YY_0218_030_C9	1	0	0	0	0	0	0	1	1	0	1	0	0	1	0	0	0	1	0	0	Coriobacteriales	Collinsella_sp.10
1462YY_0218_030_D10	0	0	0	0	0	0	0	1	1	0	1	0	0	0	0	1	0	1	0	0	Erysipelotrichales	Catenibacterium_sp.
1462YY_0218_030_D11	1	0	0	0	0	0	0	1	1	1	0	0	1	1	1	1	0	0	0	0	Clostridiales	Clostridium_perfringens
1462YY_0218_030_D12	1	0	0	0	0	0	0	1	1	1	0	0	1	1	1	1	0	0	0	0	Clostridiales	Clostridium_perfringens
1462YY_0218_030_D1	0	0	0	0	0	0	0	1	1	0	1	0	0	2	1	1	0	0	0	1	Clostridiales	Ruminococcus_sp.1
1462YY_0218_030_D2	0	0	0	0	0	0	0	1	1	0	1	0	0	1	0	1	0	0	0	0	Unknown	Unknown_genus_43
1462YY_0218_030_D3	0	0	0	1	1	1	1	1	2	0	1	0	0	0	0	0	0	0	0	0	Bacteroidales	Prevotella_sp.
1462YY_0218_030_D4	0	0	0	0	0	0	0	1	1	0	1	0	0	0	0	1	0	0	0	0	Unknown	Unknown_genus_38
1462YY_0218_030_D5	1	0	0	1	1	1	1	1	2	1	0	0	0	0	0	0	0	1	1	0	Bacteroidales	Parabacteroides_merdae
1462YY_0218_030_D6	0	0	0	0	0	0	0	1	1	0	1	0	0	0	0	0	0	0	0	0	Unknown	Unknown_genus_14
1462YY_0218_030_D7	1	0	0	1	1	1	1	1	2	1	0	0	0	0	0	0	0	1	1	0	Bacteroidales	Parabacteroides_merdae
1462YY_0218_030_D8	1	0	0	0	1	1	1	1	2	0	1	0	0	0	0	0	0	1	0	0	Bacteroidales	Prevotella_sp.2
1462YY_0218_030_E10	0	0	0	0	0	0	0	1	1	0	1	0	0	0	0	0	0	1	0	0	Erysipelotrichales	Catenibacterium_sp.
1462YY_0218_030_E11	1	0	0	0	0	0	0	1	1	1	0	0	1	1	1	1	0	0	0	0	Clostridiales	Clostridium_perfringens
1462YY_0218_030_E12	1	0	0	0	0	0	0	1	1	1	0	0	1	1	1	1	0	0	0	0	Clostridiales	Clostridium_perfringens
1462YY_0218_030_E1	1	0	0	1	0	0	0	1	2	1	0	0	0	0	0	0	0	1	0	0	Bacteroidales	Alistipes_senegalensis
1462YY_0218_030_E2	1	0	0	1	1	1	1	1	2	0	1	0	0	0	0	0	0	1	0	0	Unknown	Unknown_genus_51
1462YY_0218_030_E3	1	0	0	0	0	0	0	1	1	0	1	0	0	2	1	1	0	0	0	1	Clostridiales	Blautia_sp.1
1462YY_0218_030_E4	1	0	1	1	1	1	1	1	1	1	0	0	0	3	1	0	0	2	0	0	Enterobacterales	Escherichia_coli
1462YY_0218_030_E5	1	0	1	1	1	1	1	1	1	1	0	0	0	3	0	0	0	2	0	0	Enterobacterales	Escherichia_coli
1462YY_0218_030_E6	1	0	1	1	1	1	1	1	2	0	1	0	0	0	0	0	0	1	2	0	Bacteroidales	Bacteroides_uniformis
1462YY_0218_030_E7	1	0	0	0	1	1	1	1	1	0	1	0	0	0	0	1	0	0	0	1	Clostridiales	Ruminococcus_faecis
1462YY_0218_030_E9	1	0	0	1	0	0	0	1	2	1	0	0	0	0	0	0	0	1	1	0	Bacteroidales	Alistipes_onderdonkii
1462YY_0218_030_F10	1	0	0	0	0	0	0	1	1	0	1	0	0	1	0	0	0	1	0	0	Coriobacteriales	Collinsella_sp.9
1462YY_0218_030_F11	1	0	0	0	0	0	0	1	1	1	0	0	1	1	1	1	0	0	0	0	Clostridiales	Clostridium_perfringens
1462YY_0218_030_F12	1	0	0	0	0	0	0	1	1	1	0	0	1	1	1	1	0	0	0	0	Clostridiales	Clostridium_perfringens
1462YY_0218_030_F1	1	0	1	1	1	1	1	1	2	1	0	0	0	0	0	0	0	0	1	0	Bacteroidales	Parabacteroides_distasonis
1462YY_0218_030_F2	1	0	0	0	0	0	0	1	1	0	1	0	0	1	0	0	0	1	0	0	Coriobacteriales	Collinsella_sp.10
1462YY_0218_030_F3	1	0	0	0	1	1	1	1	2	0	1	0	0	0	0	0	0	1	0	0	Bacteroidales	Prevotella_sp.2
1462YY_0218_030_F5	0	0	0	0	0	0	0	1	1	0	1	0	0	1	0	1	0	0	0	0	Unknown	Unknown_genus_43
1462YY_0218_030_F6	0	0	0	0	0	0	0	1	1	0	1	0	0	0	0	1	0	1	0	0	Erysipelotrichales	Catenibacterium_sp.
1462YY_0218_030_F7	1	0	0	0	0	0	0	0	1	0	1	0	1	0	0	0	0	0	0	0	Clostridiales	Eubacterium_sp.2
1462YY_0218_030_F8	1	0	0	0	1	1	1	1	1	0	1	0	0	0	0	1	0	0	0	1	Clostridiales	Ruminococcus_faecis
1462YY_0218_030_F9	0	0	0	0	0	0	0	1	1	0	1	0	0	1	0	0	0	1	0	0	Coriobacteriales	Collinsella_sp.10
1462YY_0218_030_G10	1	0	0	1	1	1	1	1	2	0	1	0	0	0	0	0	0	0	0	0	Bacteroidales	Prevotella_sp.
1462YY_0218_030_G11	1	0	0	0	0	0	0	1	1	1	0	0	1	1	1	1	0	0	0	0	Clostridiales	Clostridium_perfringens
1462YY_0218_030_G12	1	0	0	0	0	0	0	1	1	1	0	0	1	1	1	1	0	0	0	0	Clostridiales	Clostridium_perfringens
1462YY_0218_030_G1	0	0	0	0	0	0	0	1	1	0	1	0	0	1	0	1	0	0	0	0	Unknown	Unknown_genus_43
1462YY_0218_030_G2	0	0	0	0	0	0	0	1	1	0	1	0	0	1	0	1	0	0	0	0	Unknown	Unknown_genus_43
1462YY_0218_030_G3	1	0	1	1	1	1	1	1	1	1	0	0	0	3	0	0	0	2	1	0	Enterobacterales	Escherichia_coli
1462YY_0218_030_G5	1	0	0	0	1	1	1	1	1	0	1	0	0	0	0	0	0	0	0	1	Clostridiales	Coprococcus_sp.1
1462YY_0218_030_G6	1	0	0	0	1	1	1	1	1	0	1	0	0	0	0	0	0	0	0	1	Clostridiales	Coprococcus_catus
1462YY_0218_030_G7	0	0	0	0	1	1	1	1	1	0	1	0	0	0	0	0	0	0	0	1	Unknown	Unknown_genus_6
1462YY_0218_030_G8	1	0	1	1	1	1	1	1	1	1	0	0	0	3	0	0	0	3	0	0	Enterobacterales	Escherichia_coli
1462YY_0218_030_G9	1	0	0	1	1	1	1	1	2	0	1	0	0	0	0	0	0	0	0	0	Bacteroidales	Prevotella_sp.
1462YY_0218_030_H10	1	0	0	0	0	0	0	1	1	0	1	0	0	1	0	0	0	1	0	0	Coriobacteriales	Collinsella_sp.10
1462YY_0218_030_H11	1	0	0	0	0	0	0	1	1	1	0	0	1	1	1	1	0	0	0	0	Clostridiales	Clostridium_perfringens
1462YY_0218_030_H1	1	0	0	1	1	1	1	1	1	0	1	0	0	0	0	0	0	1	0	1	Clostridiales	Eubacterium_hallii
1462YY_0218_030_H2	1	0	0	0	0	0	0	1	1	0	1	0	0	0	0	0	0	1	0	0	Unknown	Unknown_genus_26
1462YY_0218_030_H3	1	0	0	0	0	0	0	1	1	0	1	0	0	1	0	0	0	0	0	0	Coriobacteriales	Collinsella_sp.10
1462YY_0218_030_H4	1	0	0	0	1	1	0	1	1	0	1	0	0	1	1	0	0	0	0	0	Lactobacillales	Streptococcus_infantarius
1462YY_0218_030_H5	1	0	1	1	1	1	1	1	1	1	0	0	0	3	1	0	0	2	0	0	Enterobacterales	Escherichia_coli
1462YY_0218_030_H6	0	0	0	0	0	0	0	1	1	0	1	0	0	0	0	1	0	1	0	0	Erysipelotrichales	Catenibacterium_sp.
1462YY_0218_030_H7	1	0	0	1	1	1	1	1	2	0	1	0	0	0	0	0	0	1	0	0	Unknown	Unknown_genus_51
1462YY_0218_030_H8	1	0	0	0	0	0	0	0	1	0	1	0	0	1	0	0	0	1	0	0	Coriobacteriales	Collinsella_sp.10
1462YY_0218_030_H9	1	0	0	0	0	0	0	1	1	0	0	0	0	0	0	1	0	1	0	1	Clostridiales	Dorea_formicigenerans
2807EA_1118_063_A10	1	0	0	0	1	1	1	1	1	0	1	0	0	0	0	0	0	1	0	0	Pasteurellales	f__Pasteurellaceae(UID4932)
2807EA_1118_063_A11	1	0	0	0	0	0	0	1	1	0	1	0	0	3	2	0	0	0	0	1	Clostridiales	o__Clostridiales(UID1226)
2807EA_1118_063_A1	1	0	0	0	0	0	0	1	1	1	0	0	0	0	0	1	0	0	0	0	Lactobacillales	g__Streptococcus(UID561)
2807EA_1118_063_A3	1	0	0	0	0	0	0	0	0	0	0	0	0	0	0	0	0	0	0	1	Actinomycetales	f__Actinomycetaceae(UID1531)
2807EA_1118_063_A4	1	0	0	0	0	0	0	1	1	1	0	0	1	1	2	1	1	0	0	1	Clostridiales	o__Clostridiales(UID1120)
2807EA_1118_063_A5	0	0	0	0	0	0	0	1	1	0	1	0	0	0	0	1	0	0	0	0	unknown	k__Bacteria(UID2372)
2807EA_1118_063_A6	1	0	0	0	0	0	0	1	1	0	1	0	0	0	0	1	0	0	0	1	Clostridiales	o__Clostridiales(UID1226)
2807EA_1118_063_A7	1	0	0	0	0	0	0	1	1	0	1	0	0	0	0	0	0	0	0	0	Lactobacillales	o__Lactobacillales(UID544)
2807EA_1118_063_A8	1	1	1	0	1	1	1	1	1	0	1	0	0	0	0	0	0	0	0	0	unknown	p__Firmicutes(UID1022)
2807EA_1118_063_B10	1	0	0	0	0	0	0	1	1	0	1	0	0	1	0	0	0	1	0	0	unknown	p__Actinobacteria(UID2112)
2807EA_1118_063_B11	0	0	0	0	0	0	0	1	1	0	1	0	0	0	0	1	0	0	0	0	unknown	k__Bacteria(UID2372)
2807EA_1118_063_B1	0	0	0	0	0	0	0	1	1	0	0	0	0	5	0	1	0	1	0	0	Lactobacillales	o__Lactobacillales(UID375)
2807EA_1118_063_B2	1	1	1	0	1	1	1	1	1	0	1	0	0	0	0	0	0	0	0	0	unknown	p__Firmicutes(UID1022)
2807EA_1118_063_B4	1	0	0	0	0	0	0	1	1	0	1	0	0	0	0	1	0	0	0	0	Clostridiales	o__Clostridiales(UID1212)
2807EA_1118_063_B5	1	0	0	0	0	0	0	1	1	0	1	0	0	1	0	0	0	1	0	0	unknown	p__Actinobacteria(UID2112)
2807EA_1118_063_B6	2	0	1	0	1	1	1	1	1	1	0	0	0	0	0	0	0	0	0	0	Negativicutes	o__Selenomonadales(UID1024)
2807EA_1118_063_B8	1	0	0	0	0	0	0	1	1	0	1	0	0	0	0	0	0	0	0	0	Lactobacillales	o__Lactobacillales(UID544)
2807EA_1118_063_B9	1	0	0	0	1	1	1	1	1	0	1	0	0	0	0	0	0	1	0	0	Pasteurellales	f__Pasteurellaceae(UID4932)
2807EA_1118_063_C10	0	0	0	0	0	0	0	1	1	0	1	0	1	0	0	0	0	0	0	0	Clostridiales	o__Clostridiales(UID1212)
2807EA_1118_063_C1	1	0	0	0	0	0	0	1	1	0	1	0	0	0	0	0	0	0	0	0	Lactobacillales	o__Lactobacillales(UID544)
2807EA_1118_063_C2	0	0	0	0	0	0	0	1	1	0	1	0	1	0	0	0	0	0	0	0	Clostridiales	o__Clostridiales(UID1212)
2807EA_1118_063_C3	0	0	0	0	0	0	0	1	1	0	1	0	0	1	0	1	0	0	0	1	Clostridiales	f__Lachnospiraceae(UID1256)
2807EA_1118_063_C4	1	0	0	0	1	1	1	1	1	0	1	0	0	0	0	1	0	0	0	1	Clostridiales	o__Clostridiales(UID1226)
2807EA_1118_063_C5	1	0	0	0	0	0	0	1	1	1	0	0	0	0	0	0	0	0	0	0	Lactobacillales	g__Streptococcus(UID561)
2807EA_1118_063_C6	0	0	0	0	0	0	0	1	1	0	1	0	0	0	0	1	0	0	0	0	Clostridiales	o__Clostridiales(UID1212)
2807EA_1118_063_C7	1	0	0	0	0	0	0	1	1	0	1	0	0	0	0	1	0	0	0	1	Clostridiales	f__Lachnospiraceae(UID1256)
2807EA_1118_063_C8	0	0	0	0	0	0	0	1	1	0	1	0	1	0	0	0	0	0	0	0	Clostridiales	o__Clostridiales(UID1212)
2807EA_1118_063_D1	1	0	0	0	0	0	0	1	1	1	0	0	1	1	2	1	1	0	0	1	Clostridiales	o__Clostridiales(UID1120)
2807EA_1118_063_D2	0	0	0	0	0	0	0	1	1	0	1	0	1	0	1	1	0	1	0	1	unknown	k__Bacteria(UID2372)
2807EA_1118_063_D3	0	0	0	0	0	0	0	1	1	0	1	0	0	0	0	1	0	0	0	1	Clostridiales	o__Clostridiales(UID1226)
2807EA_1118_063_D4	0	0	0	0	0	0	0	1	1	0	0	0	0	5	0	1	0	1	0	0	Lactobacillales	o__Lactobacillales(UID375)
2807EA_1118_063_D5	1	0	0	1	1	1	1	1	2	1	0	0	0	0	0	0	0	0	0	0	Bacteroidales	o__Bacteroidales(UID2657)
2807EA_1118_063_D7	1	0	0	0	0	0	0	1	1	0	1	0	0	0	0	0	0	0	0	0	Lactobacillales	o__Lactobacillales(UID544)
2807EA_1118_063_D8	1	0	0	0	0	0	0	1	1	0	1	0	0	0	0	0	0	0	0	0	Clostridiales	o__Clostridiales(UID1120)
2807EA_1118_063_D9	1	0	0	0	0	0	0	1	1	0	1	0	0	1	0	0	0	1	0	0	unknown	p__Actinobacteria(UID2112)
2807EA_1118_063_E10	1	0	0	0	0	0	0	1	1	0	1	0	0	1	0	0	0	1	0	0	unknown	p__Actinobacteria(UID2112)
2807EA_1118_063_E11	0	0	0	0	0	0	0	1	1	0	1	0	1	0	0	0	0	0	0	0	Clostridiales	o__Clostridiales(UID1212)
2807EA_1118_063_E1	1	0	1	1	1	1	1	1	2	0	1	0	0	0	0	0	0	1	3	0	Bacteroidales	o__Bacteroidales(UID2657)
2807EA_1118_063_E2	0	0	0	0	0	0	0	1	1	0	1	0	1	0	0	0	0	0	0	0	Clostridiales	o__Clostridiales(UID1212)
2807EA_1118_063_E4	1	0	0	0	0	0	0	1	1	0	1	0	0	1	0	0	0	1	0	0	unknown	p__Actinobacteria(UID2112)
2807EA_1118_063_E6	1	0	0	0	1	1	1	1	1	0	1	0	1	1	0	0	0	0	0	0	Clostridiales	o__Clostridiales(UID1226)
2807EA_1118_063_E7	1	0	0	0	0	0	0	1	1	0	1	0	0	0	0	1	0	0	0	1	Clostridiales	f__Lachnospiraceae(UID1256)
2807EA_1118_063_E8	1	0	0	0	0	0	0	1	1	0	1	0	0	1	1	0	0	0	0	1	Clostridiales	o__Clostridiales(UID1226)
2807EA_1118_063_E9	1	0	0	0	1	1	1	1	1	0	1	0	0	0	0	0	0	1	0	0	Pasteurellales	f__Pasteurellaceae(UID4932)
2807EA_1118_063_F10	0	0	0	0	1	1	1	1	1	0	1	0	0	0	0	0	0	0	0	1	Clostridiales	o__Clostridiales(UID1212)
2807EA_1118_063_F11	1	0	0	0	0	0	0	1	1	0	1	0	0	1	0	0	0	1	0	0	unknown	p__Actinobacteria(UID2112)
2807EA_1118_063_F1	1	1	1	0	1	1	1	1	1	0	1	0	0	0	0	0	0	0	0	0	unknown	p__Firmicutes(UID1022)
2807EA_1118_063_F2	0	0	0	0	0	0	0	1	1	0	1	0	0	0	0	1	0	0	0	0	Clostridiales	o__Clostridiales(UID1125)
2807EA_1118_063_F4	1	0	0	0	0	0	0	1	1	0	1	0	0	2	1	1	0	0	0	1	Clostridiales	o__Clostridiales(UID1226)
2807EA_1118_063_F5	2	0	1	0	1	1	1	1	1	1	0	0	0	0	0	0	0	0	0	0	Negativicutes	o__Selenomonadales(UID1024)
2807EA_1118_063_F6	0	0	0	0	1	1	1	1	1	0	1	0	0	0	0	0	0	1	0	0	Pasteurellales	f__Pasteurellaceae(UID4932)
2807EA_1118_063_F8	1	0	0	0	1	1	1	1	2	1	0	0	0	0	0	0	0	0	0	0	Bacteroidales	g__Prevotella(UID2724)
2807EA_1118_063_F9	1	0	0	0	0	0	0	1	1	0	1	0	0	1	1	1	0	0	0	0	Clostridiales	o__Clostridiales(UID1226)
2807EA_1118_063_G10	0	0	0	0	0	0	0	1	1	0	1	0	0	0	0	1	0	0	0	1	Clostridiales	o__Clostridiales(UID1226)
2807EA_1118_063_G11	0	0	0	0	0	0	0	1	1	0	1	0	0	0	0	1	0	0	0	0	Clostridiales	o__Clostridiales(UID1212)
2807EA_1118_063_G1	1	0	0	0	0	0	0	1	1	0	1	1	1	0	0	0	0	0	0	0	unknown	k__Bacteria(UID2329)
2807EA_1118_063_G2	1	0	0	0	0	0	0	1	1	0	1	0	0	2	1	1	0	0	0	1	Clostridiales	o__Clostridiales(UID1226)
2807EA_1118_063_G3	1	0	1	0	1	1	0	1	1	0	1	0	0	0	0	1	0	0	0	0	Lactobacillales	g__Streptococcus(UID561)
2807EA_1118_063_G5	0	0	0	0	0	0	0	1	1	0	1	0	0	0	0	1	0	0	0	1	Clostridiales	o__Clostridiales(UID1226)
2807EA_1118_063_G6	1	0	0	0	0	0	0	1	1	1	0	0	0	0	0	0	0	0	0	0	Lactobacillales	g__Streptococcus(UID561)
2807EA_1118_063_G7	1	0	0	0	0	0	0	1	1	0	1	0	0	0	0	0	0	0	0	0	Lactobacillales	o__Lactobacillales(UID544)
2807EA_1118_063_H10	0	0	0	0	0	0	0	1	1	0	1	0	0	2	0	1	0	0	0	1	unknown	k__Bacteria(UID2372)
2807EA_1118_063_H11	1	0	0	0	0	0	0	1	1	0	1	0	0	1	1	1	0	0	0	1	Clostridiales	f__Lachnospiraceae(UID1256)
2807EA_1118_063_H1	1	0	0	0	0	0	0	1	1	1	0	0	0	0	0	0	0	0	0	0	Lactobacillales	g__Streptococcus(UID561)
2807EA_1118_063_H2	1	0	0	0	0	0	0	1	1	1	0	0	0	0	0	0	0	0	0	0	Lactobacillales	g__Streptococcus(UID561)
2807EA_1118_063_H3	1	0	0	0	0	0	0	1	1	0	1	0	0	0	0	1	0	0	0	1	Clostridiales	f__Lachnospiraceae(UID1256)
2807EA_1118_063_H4	1	0	0	0	0	0	0	1	1	0	1	0	0	0	0	1	0	0	0	1	Clostridiales	o__Clostridiales(UID1226)
2807EA_1118_063_H5	1	0	0	0	0	0	0	1	1	0	1	0	0	0	0	1	0	0	0	1	Clostridiales	f__Lachnospiraceae(UID1256)
2807EA_1118_063_H6	1	0	0	0	0	0	0	1	1	0	1	0	0	0	0	0	0	0	0	0	Lactobacillales	o__Lactobacillales(UID544)
2807EA_1118_063_H7	1	0	0	0	0	0	0	1	1	1	0	0	1	1	1	1	0	0	0	0	Clostridiales	o__Clostridiales(UID1375)
2807EA_1118_063_H8	1	0	0	0	0	0	0	1	1	0	1	0	0	1	1	1	0	0	0	1	Clostridiales	o__Clostridiales(UID1226)
2807EA_1118_063_H9	0	0	0	0	0	0	0	1	1	0	1	0	0	0	0	1	0	0	0	1	Clostridiales	o__Clostridiales(UID1226)
2880HW_0517_025_A10	1	0	1	1	1	1	1	1	2	0	1	0	0	0	0	0	0	1	1	0	Bacteroidales	Bacteroides_vulgatus
2880HW_0517_025_A11	1	0	0	1	1	1	1	1	2	0	1	0	0	0	0	0	0	3	0	0	Bacteroidales	Bacteroides_ovatus
2880HW_0517_025_A1	1	0	1	1	1	1	1	1	2	0	1	0	0	0	0	0	0	1	1	0	Bacteroidales	Bacteroides_vulgatus
2880HW_0517_025_A2	1	0	0	0	1	0	1	1	2	0	1	0	0	0	0	0	0	1	0	0	Bacteroidales	Odoribacter_splanchnicus
2880HW_0517_025_A3	1	0	0	1	1	1	1	1	2	1	0	0	0	0	0	0	0	0	1	0	Bacteroidales	Bacteroides_faecichinchillae
2880HW_0517_025_A4	1	0	1	1	1	1	1	1	2	0	1	0	0	0	0	0	0	1	1	0	Bacteroidales	Bacteroides_dorei
2880HW_0517_025_A5	1	0	1	1	1	1	1	1	2	0	1	0	0	0	0	0	0	1	1	0	Bacteroidales	Bacteroides_dorei
2880HW_0517_025_A6	1	0	1	1	1	1	1	1	2	0	1	0	0	0	0	0	0	1	1	0	Bacteroidales	Bacteroides_vulgatus
2880HW_0517_025_A7	1	0	0	1	1	1	1	1	2	1	0	0	0	0	0	0	0	0	1	0	Bacteroidales	Bacteroides_faecichinchillae
2880HW_0517_025_A8	1	0	1	1	1	1	1	1	2	0	1	0	0	0	0	0	0	1	1	0	Bacteroidales	Bacteroides_dorei
2880HW_0517_025_A9	1	0	0	0	1	1	1	1	2	0	1	0	0	0	0	0	0	1	0	0	Bacteroidales	Prevotella_copri
2880HW_0517_025_B10	2	0	1	0	1	1	1	1	1	1	0	0	0	0	0	0	0	0	0	0	Negativicutes	Veillonella_sp.
2880HW_0517_025_B11	1	0	0	0	1	1	1	1	2	0	1	0	0	0	0	0	0	0	1	0	Bacteroidales	Bacteroides_finegoldii
2880HW_0517_025_B2	1	0	1	1	1	1	1	1	2	0	1	0	0	0	0	0	0	1	1	0	Bacteroidales	Bacteroides_vulgatus
2880HW_0517_025_B3	1	0	1	1	1	1	1	1	2	0	1	0	0	0	0	0	0	1	1	0	Bacteroidales	Bacteroides_vulgatus
2880HW_0517_025_B4	1	0	1	1	1	1	1	1	2	0	1	0	0	0	0	0	0	1	1	0	Bacteroidales	Bacteroides_dorei
2880HW_0517_025_B5	1	0	1	1	1	1	1	1	2	1	0	0	0	0	0	0	0	1	0	0	Bacteroidales	Parabacteroides_sp.
2880HW_0517_025_B6	1	0	1	1	1	1	1	1	2	0	1	0	0	0	0	0	0	1	1	0	Bacteroidales	Bacteroides_dorei
2880HW_0517_025_B7	1	0	1	1	1	1	1	1	1	0	1	0	0	0	0	0	0	1	1	0	Bacteroidales	Bacteroides_dorei
2880HW_0517_025_B8	1	0	0	0	1	1	1	1	2	0	1	0	0	0	0	0	0	1	0	0	Bacteroidales	Prevotella_copri
2880HW_0517_025_B9	1	0	0	1	1	1	1	1	2	0	1	0	0	0	0	0	0	3	1	0	Bacteroidales	Bacteroides_ovatus
2880HW_0517_025_C10	1	0	0	1	1	1	1	1	2	1	0	0	0	0	0	0	0	0	1	0	Bacteroidales	Bacteroides_faecichinchillae
2880HW_0517_025_C11	1	0	1	1	1	1	1	1	2	1	0	0	0	0	0	0	0	1	0	0	Bacteroidales	Parabacteroides_sp.
2880HW_0517_025_C1	1	0	1	1	1	1	1	1	2	0	1	0	0	0	0	0	0	1	1	0	Bacteroidales	Bacteroides_vulgatus
2880HW_0517_025_C2	1	0	1	1	1	1	1	1	2	0	1	0	0	0	0	0	0	1	1	0	Bacteroidales	Bacteroides_vulgatus
2880HW_0517_025_C3	1	0	1	1	1	1	1	1	2	0	1	0	0	0	0	0	0	1	1	0	Bacteroidales	Bacteroides_dorei
2880HW_0517_025_C4	1	0	0	0	1	1	1	1	2	0	1	0	0	0	0	0	0	1	0	0	Bacteroidales	Prevotella_copri
2880HW_0517_025_C5	1	0	1	1	1	1	1	1	2	0	1	0	0	0	0	0	0	1	1	0	Bacteroidales	Bacteroides_dorei
2880HW_0517_025_C6	1	0	0	0	1	1	1	1	2	0	1	0	0	0	0	0	0	1	0	0	Bacteroidales	Prevotella_copri
2880HW_0517_025_C7	1	0	0	1	1	1	1	1	2	0	1	0	0	0	0	0	0	3	1	0	Bacteroidales	Bacteroides_ovatus
2880HW_0517_025_C8	1	0	0	0	1	1	1	1	2	0	1	0	0	0	0	0	0	0	1	0	Bacteroidales	Bacteroides_finegoldii
2880HW_0517_025_C9	1	0	0	1	1	1	1	1	2	0	1	0	0	0	0	0	0	3	1	0	Bacteroidales	Bacteroides_ovatus
2880HW_0517_025_D10	1	0	0	1	1	1	1	1	2	1	0	0	0	0	0	0	0	0	1	0	Bacteroidales	Parabacteroides_distasonis
2880HW_0517_025_D11	1	0	0	1	1	1	1	1	2	0	1	0	0	0	0	0	0	1	0	0	Unknown	Unknown_genus_49
2880HW_0517_025_D1	1	0	1	1	1	1	1	1	2	0	1	0	0	0	0	0	0	1	1	0	Bacteroidales	Bacteroides_vulgatus
2880HW_0517_025_D2	1	0	1	1	1	1	1	1	2	0	1	0	0	0	0	0	0	1	1	0	Bacteroidales	Bacteroides_dorei
2880HW_0517_025_D3	1	0	1	1	1	1	1	1	2	0	1	0	0	0	0	0	0	1	1	0	Bacteroidales	Bacteroides_vulgatus
2880HW_0517_025_D4	1	0	1	1	1	1	1	1	2	1	0	0	0	0	0	0	0	1	0	0	Bacteroidales	Parabacteroides_sp.
2880HW_0517_025_D5	1	0	0	1	1	1	1	1	2	0	1	0	0	0	0	0	0	3	0	0	Bacteroidales	Bacteroides_ovatus
2880HW_0517_025_D7	2	0	1	2	1	1	1	1	2	1	0	0	0	0	0	0	0	0	1	0	Bacteroidales	Parabacteroides_distasonis
2880HW_0517_025_D8	1	0	1	1	1	1	1	1	2	0	1	0	0	0	0	0	0	1	1	0	Bacteroidales	Bacteroides_dorei
2880HW_0517_025_D9	1	0	1	1	1	1	1	1	2	1	0	0	0	0	0	0	0	1	0	0	Bacteroidales	Parabacteroides_sp.
2880HW_0517_025_E10	1	0	0	1	1	1	1	1	2	0	1	0	0	0	0	0	0	1	0	0	Unknown	Unknown_genus_49
2880HW_0517_025_E11	1	0	1	1	1	1	1	1	2	0	1	0	0	0	0	0	0	2	3	0	Bacteroidales	Bacteroides_uniformis
2880HW_0517_025_E1	1	0	1	1	1	0	1	1	2	0	1	0	0	0	0	0	0	1	1	0	Bacteroidales	Bacteroides_vulgatus
2880HW_0517_025_E2	1	0	1	1	1	1	1	1	2	0	1	0	0	0	0	0	0	1	1	0	Bacteroidales	Bacteroides_vulgatus
2880HW_0517_025_E3	1	0	1	1	1	1	1	1	2	0	1	0	0	0	0	0	0	1	1	0	Bacteroidales	Bacteroides_dorei
2880HW_0517_025_E4	1	0	1	1	1	1	1	1	2	0	1	0	0	0	0	0	0	1	1	0	Bacteroidales	Bacteroides_dorei
2880HW_0517_025_E5	1	0	1	1	1	1	1	1	2	0	1	0	0	0	0	0	0	1	1	0	Bacteroidales	Bacteroides_dorei
2880HW_0517_025_E6	1	0	1	1	1	1	1	1	2	0	1	0	0	0	0	0	0	1	1	0	Bacteroidales	Bacteroides_dorei
2880HW_0517_025_E7	1	0	1	1	1	1	1	1	2	0	1	0	0	0	0	0	0	1	1	0	Bacteroidales	Bacteroides_dorei
2880HW_0517_025_E8	1	0	0	1	1	1	1	1	2	1	0	0	0	0	0	0	0	0	1	0	Bacteroidales	Parabacteroides_distasonis
2880HW_0517_025_E9	1	0	0	0	1	1	1	1	2	0	1	0	0	0	0	0	0	1	0	0	Bacteroidales	Prevotella_copri
2880HW_0517_025_F10	1	0	0	0	1	1	1	1	2	0	1	0	0	0	0	0	0	1	0	0	Bacteroidales	Prevotella_copri
2880HW_0517_025_F11	1	0	1	1	1	1	1	1	2	0	1	0	0	0	0	0	0	1	2	0	Bacteroidales	Bacteroides_uniformis
2880HW_0517_025_F1	1	0	1	1	1	1	1	1	2	0	1	0	0	0	0	0	0	1	1	0	Bacteroidales	Bacteroides_dorei
2880HW_0517_025_F2	1	0	1	1	1	1	1	1	2	0	1	0	0	0	0	0	0	1	1	0	Bacteroidales	Bacteroides_vulgatus
2880HW_0517_025_F3	1	0	0	0	1	1	1	1	2	0	1	0	0	0	0	0	0	1	0	0	Bacteroidales	Prevotella_copri
2880HW_0517_025_F4	1	0	1	1	1	1	1	1	2	0	1	0	0	0	0	0	0	1	1	0	Bacteroidales	Bacteroides_vulgatus
2880HW_0517_025_F5	1	0	0	0	1	0	1	1	2	0	1	0	0	0	0	0	0	1	0	0	Bacteroidales	Odoribacter_splanchnicus
2880HW_0517_025_F6	1	0	1	1	1	1	1	1	2	0	1	0	0	0	0	0	0	1	1	0	Bacteroidales	Bacteroides_dorei
2880HW_0517_025_F7	1	0	1	1	1	1	1	1	2	0	1	0	0	0	0	0	0	1	1	0	Bacteroidales	Bacteroides_dorei
2880HW_0517_025_F8	1	0	0	0	1	1	1	1	1	1	0	0	0	0	0	0	0	0	0	0	Negativicutes	Veillonella_sp.
2880HW_0517_025_G10	1	0	0	0	1	1	1	1	2	0	1	0	0	0	0	0	0	1	0	0	Bacteroidales	Prevotella_copri
2880HW_0517_025_G1	1	0	0	1	1	1	1	1	2	0	1	0	0	0	0	0	0	3	1	0	Bacteroidales	Bacteroides_ovatus
2880HW_0517_025_G2	1	0	0	0	1	1	1	1	2	0	1	0	0	0	0	0	0	1	0	0	Bacteroidales	Prevotella_copri
2880HW_0517_025_G3	1	0	0	1	1	1	1	1	2	0	1	0	0	0	0	0	0	3	1	0	Bacteroidales	Bacteroides_ovatus
2880HW_0517_025_G4	1	0	1	1	1	1	1	1	2	0	1	0	0	0	0	0	0	1	1	0	Bacteroidales	Bacteroides_vulgatus
2880HW_0517_025_G5	1	0	1	1	1	1	1	1	2	1	0	0	0	0	0	0	0	1	0	0	Bacteroidales	Parabacteroides_sp.
2880HW_0517_025_G6	1	0	1	1	1	1	1	1	2	0	1	0	0	0	0	0	0	1	1	0	Bacteroidales	Bacteroides_dorei
2880HW_0517_025_G7	1	0	0	1	1	1	1	1	2	0	1	0	0	0	0	0	0	1	1	0	Bacteroidales	Bacteroides_xylanisolvens
2880HW_0517_025_G8	1	0	0	1	1	1	1	1	1	0	1	0	0	0	0	0	0	3	1	0	Bacteroidales	Bacteroides_ovatus
2880HW_0517_025_G9	1	0	1	1	1	1	1	1	2	0	1	0	0	0	0	0	0	1	1	0	Bacteroidales	Bacteroides_vulgatus
2880HW_0517_025_H10	2	0	0	1	1	1	1	1	1	0	1	1	1	0	0	0	0	0	0	0	Fusobacteriales	Fusobacterium_mortiferum
2880HW_0517_025_H1	1	0	0	1	0	0	0	1	2	1	0	0	0	0	0	0	0	1	1	0	Bacteroidales	Alistipes_shahii
2880HW_0517_025_H2	1	0	1	1	1	1	1	1	2	0	1	0	0	0	0	0	0	1	1	0	Bacteroidales	Bacteroides_vulgatus
2880HW_0517_025_H3	1	0	0	1	1	1	1	1	2	0	1	0	0	0	0	0	0	3	0	0	Bacteroidales	Bacteroides_ovatus
2880HW_0517_025_H4	1	0	0	1	1	1	1	1	2	0	1	0	0	0	0	0	0	1	0	0	Unknown	Unknown_genus_49
2880HW_0517_025_H5	1	0	1	1	1	1	1	1	2	0	1	0	0	0	0	0	0	1	1	0	Bacteroidales	Bacteroides_vulgatus
2880HW_0517_025_H6	1	0	0	1	1	1	1	1	2	0	1	0	0	0	0	0	0	3	1	0	Bacteroidales	Bacteroides_ovatus
2880HW_0517_025_H7	1	0	0	1	1	1	1	1	2	0	1	0	0	0	0	0	0	3	1	0	Bacteroidales	Bacteroides_ovatus
2880HW_0517_025_H9	1	0	0	1	1	1	1	1	2	0	1	0	0	0	0	0	0	3	0	0	Bacteroidales	Bacteroides_ovatus
2959BY_0717_054_A10	1	0	0	1	1	1	1	1	1	0	1	0	0	0	0	1	0	0	0	1	Clostridiales	f__Lachnospiraceae(UID1256)
2959BY_0717_054_A11	2	0	1	2	1	1	1	1	2	0	1	0	0	0	0	0	0	1	1	0	Bacteroidales	o__Bacteroidales(UID2657)
2959BY_0717_054_A12	1	0	0	1	1	1	1	1	2	0	1	0	0	0	0	0	0	2	2	0	Bacteroidales	o__Bacteroidales(UID2657)
2959BY_0717_054_A1	1	0	1	2	1	1	1	1	2	0	1	0	0	0	0	0	0	1	1	0	Bacteroidales	o__Bacteroidales(UID2657)
2959BY_0717_054_A2	2	0	1	2	1	1	1	1	2	1	0	0	0	0	0	0	0	1	1	0	Bacteroidales	o__Bacteroidales(UID2621)
2959BY_0717_054_A3	1	0	0	1	1	1	1	1	1	0	1	0	0	0	0	1	0	0	0	1	Clostridiales	f__Lachnospiraceae(UID1256)
2959BY_0717_054_A4	1	0	1	1	1	1	1	1	2	0	1	0	0	0	0	0	0	1	1	0	Bacteroidales	o__Bacteroidales(UID2657)
2959BY_0717_054_A6	1	0	1	1	1	1	1	1	2	0	1	0	0	0	0	0	0	1	1	0	Bacteroidales	o__Bacteroidales(UID2654)
2959BY_0717_054_A7	2	0	1	2	1	1	1	1	2	0	1	0	0	0	0	0	0	1	1	0	Bacteroidales	o__Bacteroidales(UID2657)
2959BY_0717_054_A8	1	0	0	1	1	1	1	1	2	1	0	0	0	0	0	0	0	1	1	0	Bacteroidales	o__Bacteroidales(UID2621)
2959BY_0717_054_A9	1	0	1	1	1	1	1	1	2	1	0	0	0	0	0	0	0	0	0	0	Bacteroidales	o__Bacteroidales(UID2657)
2959BY_0717_054_B10	1	0	1	1	1	1	1	1	2	0	1	0	0	0	0	0	0	1	1	0	Bacteroidales	o__Bacteroidales(UID2654)
2959BY_0717_054_B11	2	0	1	2	1	1	1	1	2	0	1	0	0	0	0	0	0	1	1	0	Bacteroidales	o__Bacteroidales(UID2657)
2959BY_0717_054_B1	1	0	0	0	0	0	0	1	0	0	0	0	0	1	0	0	0	1	0	2	Bifidobacteriales	f__Bifidobacteriaceae(UID1462)
2959BY_0717_054_B2	2	0	1	2	1	1	1	1	2	1	0	0	0	0	0	0	0	1	1	0	Bacteroidales	o__Bacteroidales(UID2621)
2959BY_0717_054_B3	1	0	0	1	1	1	1	1	2	0	1	0	0	0	0	0	0	3	1	0	Bacteroidales	g__Bacteroides(UID2691)
2959BY_0717_054_B4	0	0	0	0	0	0	0	1	1	0	1	0	0	3	0	1	0	1	0	1	Clostridiales	o__Clostridiales(UID1226)
2959BY_0717_054_B5	1	0	0	0	0	0	0	1	1	0	0	0	0	0	0	1	0	2	0	0	unknown	p__Actinobacteria(UID2112)
2959BY_0717_054_B6	2	0	1	2	1	1	1	1	2	0	1	0	0	0	0	0	0	1	1	0	Bacteroidales	o__Bacteroidales(UID2657)
2959BY_0717_054_B8	1	0	1	1	0	1	1	1	2	0	1	0	0	0	0	0	0	1	1	0	Bacteroidales	o__Bacteroidales(UID2654)
2959BY_0717_054_B9	0	0	0	0	0	0	0	1	1	0	1	0	0	0	0	1	0	0	0	0	Clostridiales	o__Clostridiales(UID1212)
2959BY_0717_054_C10	1	0	0	0	1	0	1	1	2	0	1	0	0	0	0	0	0	1	0	0	unknown	k__Bacteria(UID2569)
2959BY_0717_054_C11	1	0	1	1	1	1	1	1	2	1	0	0	0	0	0	0	0	0	0	0	Bacteroidales	o__Bacteroidales(UID2657)
2959BY_0717_054_C12	0	1	0	0	1	1	0	1	1	0	1	0	0	0	0	0	0	2	0	0	unknown	p__Proteobacteria(UID3887)
2959BY_0717_054_C2	1	0	0	1	1	1	1	1	2	0	1	0	0	0	0	0	0	2	2	0	Bacteroidales	o__Bacteroidales(UID2657)
2959BY_0717_054_C3	1	0	0	1	1	1	1	1	2	0	1	0	0	0	0	0	0	3	1	0	Bacteroidales	g__Bacteroides(UID2691)
2959BY_0717_054_C4	1	0	0	0	0	0	0	1	0	0	0	0	0	3	0	0	0	1	0	2	Bifidobacteriales	f__Bifidobacteriaceae(UID1462)
2959BY_0717_054_C5	1	0	0	0	0	0	0	1	0	0	0	0	0	3	1	0	1	1	0	2	Bifidobacteriales	f__Bifidobacteriaceae(UID1462)
2959BY_0717_054_C6	0	0	0	0	0	0	0	1	1	0	1	0	0	0	0	1	0	0	0	0	Clostridiales	o__Clostridiales(UID1212)
2959BY_0717_054_C7	1	0	0	1	1	1	1	1	2	0	1	0	0	0	0	0	0	2	2	0	Bacteroidales	o__Bacteroidales(UID2657)
2959BY_0717_054_C8	2	0	1	2	1	1	1	1	2	0	1	0	0	0	0	0	0	1	1	0	Bacteroidales	o__Bacteroidales(UID2657)
2959BY_0717_054_C9	0	0	0	0	0	0	0	1	0	0	0	0	0	1	1	0	0	0	0	0	unknown	k__Bacteria(UID2372)
2959BY_0717_054_D10	1	0	1	2	1	2	2	1	3	0	1	0	0	0	0	0	0	1	1	1	Bacteroidales	o__Bacteroidales(UID2657)
2959BY_0717_054_D12	1	0	0	0	0	0	0	1	0	0	0	0	0	3	1	0	1	1	0	2	Bifidobacteriales	f__Bifidobacteriaceae(UID1462)
2959BY_0717_054_D1	1	0	1	1	1	1	1	1	2	0	1	0	0	0	0	0	0	1	1	0	Bacteroidales	o__Bacteroidales(UID2657)
2959BY_0717_054_D2	0	0	0	0	0	0	0	1	1	0	1	0	0	0	0	1	0	0	0	0	Clostridiales	o__Clostridiales(UID1212)
2959BY_0717_054_D3	1	0	0	1	1	1	1	1	2	0	1	0	0	0	0	0	0	3	1	0	Bacteroidales	g__Bacteroides(UID2691)
2959BY_0717_054_D5	1	0	1	1	1	1	1	1	2	0	1	0	0	0	0	0	0	1	1	0	Bacteroidales	o__Bacteroidales(UID2657)
2959BY_0717_054_D6	1	0	1	1	1	1	1	1	2	0	1	0	0	0	0	0	0	1	1	0	Bacteroidales	o__Bacteroidales(UID2657)
2959BY_0717_054_D7	0	0	0	0	0	0	0	1	0	0	0	0	0	1	1	0	0	0	0	0	unknown	k__Bacteria(UID2372)
2959BY_0717_054_D8	1	0	1	1	1	1	1	1	2	0	1	0	0	0	0	0	0	1	1	0	Bacteroidales	o__Bacteroidales(UID2654)
2959BY_0717_054_D9	1	0	0	1	1	1	1	1	2	1	0	0	0	0	0	0	0	1	1	0	Bacteroidales	g__Bacteroides(UID2691)
2959BY_0717_054_E10	1	0	0	1	1	1	1	1	2	0	1	0	0	0	0	0	0	3	1	0	Bacteroidales	g__Bacteroides(UID2691)
2959BY_0717_054_E11	1	0	0	1	1	1	1	1	2	1	0	0	0	0	0	0	0	1	1	0	Bacteroidales	o__Bacteroidales(UID2621)
2959BY_0717_054_E12	2	0	1	2	1	1	1	1	2	0	1	0	0	0	0	0	0	1	1	0	Bacteroidales	o__Bacteroidales(UID2657)
2959BY_0717_054_E1	1	0	0	1	1	1	1	1	2	0	1	0	0	0	0	0	0	2	1	0	Bacteroidales	o__Bacteroidales(UID2657)
2959BY_0717_054_E2	0	0	0	0	0	0	0	1	0	0	0	0	0	3	1	0	1	1	0	2	Bifidobacteriales	f__Bifidobacteriaceae(UID1462)
2959BY_0717_054_E3	1	0	0	0	0	0	0	1	0	0	0	0	0	3	1	0	1	1	0	2	Bifidobacteriales	f__Bifidobacteriaceae(UID1462)
2959BY_0717_054_E4	1	0	1	1	1	1	1	1	2	0	1	0	0	0	0	0	0	1	1	0	Bacteroidales	o__Bacteroidales(UID2657)
2959BY_0717_054_E6	1	0	0	1	0	0	0	1	2	1	0	0	0	0	0	0	0	1	1	0	unknown	p__Bacteroidetes(UID2605)
2959BY_0717_054_E7	2	0	1	2	1	1	1	1	2	0	1	0	0	0	0	0	0	1	1	0	Bacteroidales	o__Bacteroidales(UID2657)
2959BY_0717_054_E8	1	0	0	0	0	0	0	1	1	0	1	0	0	0	0	1	0	0	0	1	Clostridiales	f__Lachnospiraceae(UID1255)
2959BY_0717_054_E9	1	0	0	0	0	0	0	1	1	0	1	0	0	1	1	1	0	0	0	1	Clostridiales	o__Clostridiales(UID1226)
2959BY_0717_054_F10	0	0	0	0	0	0	0	1	1	0	1	0	0	0	0	1	0	0	0	1	Clostridiales	f__Lachnospiraceae(UID1286)
2959BY_0717_054_F11	2	0	1	2	1	1	1	1	2	0	1	0	0	0	0	0	0	1	1	0	Bacteroidales	o__Bacteroidales(UID2657)
2959BY_0717_054_F12	1	0	0	0	0	0	0	1	0	0	0	0	0	3	1	0	1	1	0	2	Bifidobacteriales	f__Bifidobacteriaceae(UID1462)
2959BY_0717_054_F1	1	0	0	0	0	0	0	2	1	0	1	0	0	1	1	1	0	0	0	1	Clostridiales	o__Clostridiales(UID1226)
2959BY_0717_054_F2	1	0	1	1	1	1	1	1	2	1	0	0	0	0	0	0	0	0	0	0	Bacteroidales	o__Bacteroidales(UID2657)
2959BY_0717_054_F3	0	0	0	0	0	0	0	1	1	0	1	0	1	2	1	0	0	0	0	1	Clostridiales	o__Clostridiales(UID1226)
2959BY_0717_054_F4	2	0	1	2	1	1	1	1	2	1	0	0	0	0	0	0	0	1	1	0	Bacteroidales	o__Bacteroidales(UID2621)
2959BY_0717_054_F5	1	0	1	1	1	1	1	1	2	1	0	0	0	0	0	0	0	0	0	0	Bacteroidales	o__Bacteroidales(UID2657)
2959BY_0717_054_F6	1	0	0	1	1	1	1	1	1	1	0	0	0	0	0	0	0	0	0	0	unknown	p__Firmicutes(UID1022)
2959BY_0717_054_F7	0	0	0	0	0	0	0	1	0	0	0	0	0	1	1	0	0	0	0	0	unknown	k__Bacteria(UID2372)
2959BY_0717_054_F8	1	0	0	1	1	1	1	1	2	0	1	0	0	0	0	0	0	3	1	0	Bacteroidales	g__Bacteroides(UID2691)
2959BY_0717_054_F9	1	0	0	1	1	1	0	1	1	1	0	0	0	0	0	0	0	0	0	0	unknown	p__Firmicutes(UID1022)
2959BY_0717_054_G10	2	0	1	2	1	1	1	1	2	1	0	0	0	0	0	0	0	1	1	0	Bacteroidales	o__Bacteroidales(UID2621)
2959BY_0717_054_G12	2	0	1	2	1	1	1	1	2	0	1	0	0	0	0	0	0	1	1	0	Bacteroidales	o__Bacteroidales(UID2657)
2959BY_0717_054_G2	1	0	1	1	1	1	1	1	2	0	1	0	0	0	0	0	0	1	1	0	Bacteroidales	o__Bacteroidales(UID2657)
2959BY_0717_054_G3	1	0	1	2	1	1	1	1	2	0	1	0	0	0	0	0	0	1	1	0	Bacteroidales	o__Bacteroidales(UID2657)
2959BY_0717_054_G5	1	0	0	1	1	1	1	1	2	0	1	0	0	0	0	0	0	2	2	0	Bacteroidales	o__Bacteroidales(UID2657)
2959BY_0717_054_G6	1	0	1	1	1	1	1	1	2	0	1	0	0	0	0	0	0	1	1	0	Bacteroidales	o__Bacteroidales(UID2657)
2959BY_0717_054_G7	1	0	1	1	1	1	1	1	2	0	1	0	0	0	0	0	0	1	1	0	Bacteroidales	o__Bacteroidales(UID2654)
2959BY_0717_054_G8	1	0	0	0	0	0	0	1	0	0	0	0	0	3	1	0	1	1	0	2	Bifidobacteriales	f__Bifidobacteriaceae(UID1462)
2959BY_0717_054_H10	0	0	0	1	1	1	1	1	1	1	0	0	0	0	0	0	0	0	0	0	unknown	p__Firmicutes(UID1022)
2959BY_0717_054_H11	1	0	0	0	0	0	0	1	0	0	0	0	0	3	1	0	1	1	0	2	Bifidobacteriales	f__Bifidobacteriaceae(UID1462)
2959BY_0717_054_H1	1	0	0	0	0	0	0	1	1	0	1	1	1	1	0	0	0	0	0	0	Clostridiales	o__Clostridiales(UID1120)
2959BY_0717_054_H3	1	0	0	0	0	0	0	1	1	0	1	0	0	1	1	1	0	0	0	1	Clostridiales	o__Clostridiales(UID1226)
2959BY_0717_054_H4	1	0	1	1	1	1	1	1	2	0	1	0	0	0	0	0	0	1	1	0	Bacteroidales	o__Bacteroidales(UID2657)
2959BY_0717_054_H6	1	0	1	1	1	1	1	1	2	1	0	0	0	0	0	0	0	0	0	0	Bacteroidales	o__Bacteroidales(UID2657)
2959BY_0717_054_H7	2	0	1	2	1	1	1	1	2	0	1	0	0	0	0	0	0	1	1	0	Bacteroidales	o__Bacteroidales(UID2657)
2959BY_0717_054_H8	1	0	1	1	1	1	1	1	2	0	1	0	0	0	0	0	0	1	1	0	Bacteroidales	o__Bacteroidales(UID2654)
2959BY_0717_054_H9	1	0	0	1	1	1	1	1	2	0	1	0	0	0	0	0	0	3	1	0	Bacteroidales	g__Bacteroides(UID2691)
3016LQ_0218_033_A10	1	0	1	1	1	1	1	1	1	1	0	0	0	2	0	0	0	4	0	0	Enterobacterales	Citrobacter_sp.
3016LQ_0218_033_A11	1	0	1	1	1	1	1	1	1	1	0	0	0	2	0	0	0	4	0	0	Enterobacterales	Citrobacter_sp.
3016LQ_0218_033_A8	1	0	1	1	1	1	1	1	1	1	0	0	0	3	1	0	0	2	0	0	Enterobacterales	Escherichia_coli
3016LQ_0218_033_A9	1	0	1	1	1	1	1	1	1	1	0	0	0	3	1	0	0	2	0	0	Enterobacterales	Escherichia_coli
3016LQ_0218_033_B10	1	0	1	1	1	1	1	1	1	1	0	0	0	2	0	0	0	4	0	0	Enterobacterales	Citrobacter_sp.
3016LQ_0218_033_B11	1	0	1	1	1	1	1	1	1	1	0	0	0	2	0	0	0	4	0	0	Enterobacterales	Citrobacter_sp.
3016LQ_0218_033_B8	1	0	1	1	1	1	1	1	1	1	0	0	0	3	0	0	0	2	0	0	Enterobacterales	Escherichia_coli
3016LQ_0218_033_B9	1	0	1	1	1	1	1	1	1	1	0	0	0	3	0	0	0	2	0	0	Enterobacterales	Escherichia_coli
3016LQ_0218_033_C10	1	0	1	1	1	1	1	1	0	1	0	0	0	2	0	0	0	4	0	0	Enterobacterales	Citrobacter_sp.
3016LQ_0218_033_C11	1	0	1	1	1	1	1	1	1	1	0	0	0	2	0	0	0	4	0	0	Enterobacterales	Citrobacter_sp.
3016LQ_0218_033_C8	1	0	1	1	1	1	1	1	1	1	0	0	0	3	1	0	0	2	0	0	Enterobacterales	Escherichia_coli
3016LQ_0218_033_D10	1	0	1	1	1	1	1	1	1	1	0	0	0	2	0	0	0	4	0	0	Enterobacterales	Citrobacter_sp.
3016LQ_0218_033_D11	0	0	1	1	1	1	1	1	1	1	0	0	0	2	0	0	0	4	0	0	Enterobacterales	Citrobacter_sp.
3016LQ_0218_033_D8	0	0	1	1	1	1	1	1	1	1	0	0	0	3	0	0	0	2	0	0	Enterobacterales	Escherichia_coli
3016LQ_0218_033_D9	1	0	1	1	1	1	1	1	1	1	0	0	0	3	0	0	0	2	0	0	Enterobacterales	Escherichia_coli
3016LQ_0218_033_E10	0	0	1	1	1	1	1	1	1	1	0	0	0	2	0	0	0	4	0	0	Enterobacterales	Citrobacter_sp.
3016LQ_0218_033_E11	1	0	1	1	1	1	1	1	1	1	0	0	0	2	0	0	0	4	0	0	Enterobacterales	Citrobacter_sp.
3016LQ_0218_033_E8	1	0	1	1	1	1	1	1	1	1	0	0	0	3	1	0	0	2	0	0	Enterobacterales	Escherichia_coli
3016LQ_0218_033_E9	1	0	1	1	1	1	1	1	1	1	0	0	0	3	0	0	0	2	0	0	Enterobacterales	Escherichia_coli
3016LQ_0218_033_F10	1	0	1	1	1	1	1	1	1	1	0	0	0	2	0	0	0	4	0	0	Enterobacterales	Citrobacter_sp.
3016LQ_0218_033_F9	1	0	1	1	1	1	1	1	1	1	0	0	0	2	0	0	0	4	0	0	Enterobacterales	Citrobacter_sp.
3016LQ_0218_033_G10	1	0	1	1	0	1	1	1	1	1	0	0	0	2	0	0	0	4	0	0	Enterobacterales	Citrobacter_sp.
3016LQ_0218_033_G8	1	0	1	1	1	1	1	1	1	1	0	0	0	3	0	0	0	2	0	0	Enterobacterales	Escherichia_coli
3016LQ_0218_033_G9	1	0	1	1	1	1	1	1	1	1	0	0	0	2	0	0	0	4	0	0	Enterobacterales	Citrobacter_sp.
3016LQ_0218_033_H10	1	0	1	1	1	1	1	1	1	1	0	0	0	2	0	0	0	4	0	0	Enterobacterales	Citrobacter_sp.
3016LQ_0218_033_H8	1	0	1	1	1	1	1	1	1	1	0	0	0	3	1	0	0	2	0	0	Enterobacterales	Escherichia_coli
3016LQ_0218_033_H9	1	0	1	1	1	1	1	1	1	1	0	0	0	2	0	0	0	4	0	0	Enterobacterales	Citrobacter_sp.
3032MC_0218_023_A1	1	0	1	1	1	1	1	1	2	1	0	0	0	0	0	0	0	0	0	0	Bacteroidales	Bacteroides_fragilis
3032MC_0218_023_A2	1	0	0	1	1	1	1	1	2	1	0	0	0	0	0	0	0	1	0	0	Bacteroidales	Parabacteroides_sp.
3032MC_0218_023_A3	1	0	1	1	1	1	1	1	2	1	0	0	0	0	0	0	0	0	0	0	Bacteroidales	Bacteroides_fragilis
3032MC_0218_023_A4	1	0	0	1	1	0	1	1	2	1	0	0	0	0	0	0	0	0	0	0	Unknown	Unknown_genus_31
3032MC_0218_023_A5	1	0	1	1	1	1	1	1	2	1	0	0	0	0	0	0	0	0	0	0	Bacteroidales	Bacteroides_fragilis
3032MC_0218_023_A6	2	0	0	1	1	1	1	1	1	0	1	1	0	0	0	0	0	0	0	0	Fusobacteriales	Fusobacterium_gonidiaformans
3032MC_0218_023_A7	1	0	1	1	1	1	1	1	2	1	0	0	0	0	0	0	0	0	0	0	Bacteroidales	Bacteroides_fragilis
3032MC_0218_023_A8	1	0	1	1	1	1	1	1	2	1	0	0	0	0	0	0	0	0	0	0	Bacteroidales	Bacteroides_fragilis
3032MC_0218_023_A9	1	0	0	1	1	1	1	1	2	1	0	0	0	0	0	0	0	1	0	0	Bacteroidales	Parabacteroides_sp.
3032MC_0218_023_B1	1	0	1	1	1	1	1	1	2	1	0	0	0	0	0	0	0	0	0	0	Bacteroidales	Bacteroides_fragilis
3032MC_0218_023_B2	1	0	1	1	1	1	1	1	2	1	0	0	0	0	0	0	0	0	0	0	Bacteroidales	Bacteroides_fragilis
3032MC_0218_023_B3	1	0	1	1	1	1	1	1	2	1	0	0	0	0	0	0	0	0	0	0	Bacteroidales	Bacteroides_fragilis
3032MC_0218_023_B4	1	0	0	1	1	0	1	1	2	1	0	0	0	0	0	0	0	0	0	0	Unknown	Unknown_genus_31
3032MC_0218_023_B5	1	0	1	1	1	1	1	1	2	1	0	0	0	0	0	0	0	0	0	0	Bacteroidales	Bacteroides_fragilis
3032MC_0218_023_B6	1	0	1	1	1	1	1	1	2	1	0	0	0	0	0	0	0	0	0	0	Bacteroidales	Bacteroides_fragilis
3032MC_0218_023_B7	1	0	0	0	1	0	1	1	2	0	1	0	0	0	0	0	0	1	0	0	Bacteroidales	Odoribacter_splanchnicus
3032MC_0218_023_B8	1	0	1	1	1	1	1	1	2	1	0	0	0	0	0	0	0	0	0	0	Bacteroidales	Bacteroides_fragilis
3032MC_0218_023_B9	1	0	0	1	1	1	1	1	2	1	0	0	0	0	0	0	0	1	0	0	Bacteroidales	Parabacteroides_sp.
3032MC_0218_023_C2	1	0	1	1	1	1	1	1	2	1	0	0	0	0	0	0	0	0	0	0	Bacteroidales	Bacteroides_fragilis
3032MC_0218_023_C3	1	0	0	0	1	0	1	1	2	0	1	0	0	0	0	0	0	1	0	0	Bacteroidales	Odoribacter_splanchnicus
3032MC_0218_023_C4	1	0	0	1	0	0	0	1	2	1	0	0	0	0	0	0	0	1	1	0	Bacteroidales	Alistipes_senegalensis
3032MC_0218_023_C5	1	0	1	1	1	1	1	1	2	1	0	0	0	0	0	0	0	0	0	0	Bacteroidales	Bacteroides_fragilis
3032MC_0218_023_C6	1	0	1	1	1	1	1	1	2	1	0	0	0	0	0	0	0	0	0	0	Bacteroidales	Bacteroides_fragilis
3032MC_0218_023_C7	1	0	1	1	1	1	1	1	2	1	0	0	0	0	0	0	0	0	0	0	Bacteroidales	Bacteroides_fragilis
3032MC_0218_023_C8	1	0	1	1	1	1	1	1	2	1	0	0	0	0	0	0	0	0	0	0	Bacteroidales	Bacteroides_fragilis
3032MC_0218_023_C9	2	0	0	1	1	1	1	1	1	0	1	1	0	0	0	0	0	0	0	0	Fusobacteriales	Fusobacterium_gonidiaformans
3032MC_0218_023_D1	1	0	1	1	1	1	1	1	2	1	0	0	0	0	0	0	0	0	0	0	Bacteroidales	Bacteroides_fragilis
3032MC_0218_023_D2	1	0	1	1	1	1	1	1	2	1	0	0	0	0	0	0	0	0	0	0	Bacteroidales	Bacteroides_fragilis
3032MC_0218_023_D3	1	0	1	1	1	1	1	1	2	1	0	0	0	0	0	0	0	0	0	0	Bacteroidales	Bacteroides_fragilis
3032MC_0218_023_D4	1	0	1	1	1	1	1	1	2	1	0	0	0	0	0	0	0	0	0	0	Bacteroidales	Bacteroides_fragilis
3032MC_0218_023_D5	1	0	0	1	1	0	1	1	2	1	0	0	0	0	0	0	0	0	0	0	Unknown	Unknown_genus_31
3032MC_0218_023_D6	1	0	1	1	1	1	1	1	2	1	0	0	0	0	0	0	0	0	0	0	Bacteroidales	Bacteroides_fragilis
3032MC_0218_023_D7	1	0	0	0	1	0	1	1	2	0	1	0	0	0	0	0	0	1	0	0	Bacteroidales	Odoribacter_splanchnicus
3032MC_0218_023_D8	1	0	1	1	1	1	1	1	2	1	0	0	0	0	0	0	0	0	0	0	Bacteroidales	Bacteroides_fragilis
3032MC_0218_023_D9	1	0	1	1	1	1	1	1	2	1	0	0	0	0	0	0	0	0	0	0	Bacteroidales	Bacteroides_fragilis
3032MC_0218_023_E1	1	0	1	1	1	1	1	1	2	1	0	0	0	0	0	0	0	0	0	0	Bacteroidales	Bacteroides_fragilis
3032MC_0218_023_E2	1	0	1	1	1	1	1	1	2	1	0	0	0	0	0	0	0	0	0	0	Bacteroidales	Bacteroides_fragilis
3032MC_0218_023_E3	1	0	1	1	1	1	1	1	2	1	0	0	0	0	0	0	0	0	0	0	Bacteroidales	Bacteroides_fragilis
3032MC_0218_023_E4	1	0	1	1	1	1	1	1	2	1	0	0	0	0	0	0	0	0	0	0	Bacteroidales	Bacteroides_fragilis
3032MC_0218_023_E5	1	0	1	1	1	1	1	1	2	1	0	0	0	0	0	0	0	0	0	0	Bacteroidales	Bacteroides_fragilis
3032MC_0218_023_E6	1	0	1	1	1	1	1	1	2	1	0	0	0	0	0	0	0	0	0	0	Bacteroidales	Bacteroides_fragilis
3032MC_0218_023_E7	1	0	0	1	1	1	1	1	2	1	0	0	0	0	0	0	0	1	0	0	Bacteroidales	Parabacteroides_sp.
3032MC_0218_023_E8	2	0	0	1	1	1	1	1	1	0	1	1	0	0	0	0	0	0	0	0	Fusobacteriales	Fusobacterium_gonidiaformans
3032MC_0218_023_F1	1	0	0	1	1	1	1	1	2	1	0	0	0	0	0	0	0	1	0	0	Bacteroidales	Prevotella_sp.3
3032MC_0218_023_F2	2	0	0	1	1	1	1	1	1	0	1	1	0	0	0	0	0	0	0	0	Fusobacteriales	Fusobacterium_gonidiaformans
3032MC_0218_023_F3	1	0	0	0	1	0	1	1	2	0	1	0	0	0	0	0	0	1	0	0	Bacteroidales	Odoribacter_splanchnicus
3032MC_0218_023_F4	1	0	1	1	1	1	1	1	2	1	0	0	0	0	0	0	0	0	0	0	Bacteroidales	Bacteroides_fragilis
3032MC_0218_023_F5	1	0	1	1	1	1	1	1	2	1	0	0	0	0	0	0	0	0	0	0	Bacteroidales	Bacteroides_fragilis
3032MC_0218_023_F6	1	0	0	0	1	0	1	1	2	0	1	0	0	0	0	0	0	1	0	0	Bacteroidales	Odoribacter_splanchnicus
3032MC_0218_023_F7	1	0	1	1	1	1	1	1	2	1	0	0	0	0	0	0	0	0	0	0	Bacteroidales	Bacteroides_fragilis
3032MC_0218_023_F8	1	0	1	1	1	1	1	1	2	1	0	0	0	0	0	0	0	0	0	0	Bacteroidales	Bacteroides_fragilis
3032MC_0218_023_F9	0	0	0	0	0	0	0	1	1	0	1	0	0	0	0	1	0	0	0	0	Unknown	Unknown_genus_17
3032MC_0218_023_G1	1	0	1	1	1	1	1	1	2	1	0	0	0	0	0	0	0	0	0	0	Bacteroidales	Bacteroides_fragilis
3032MC_0218_023_G2	1	0	1	1	1	1	1	1	2	1	0	0	0	0	0	0	0	0	0	0	Bacteroidales	Bacteroides_fragilis
3032MC_0218_023_G3	1	0	1	1	1	1	1	1	2	1	0	0	0	0	0	0	0	0	0	0	Bacteroidales	Bacteroides_fragilis
3032MC_0218_023_G4	1	0	1	1	1	1	1	1	2	1	0	0	0	0	0	0	0	0	0	0	Bacteroidales	Bacteroides_fragilis
3032MC_0218_023_G5	1	0	0	1	1	1	1	1	2	0	1	0	0	0	0	0	0	1	0	0	Unknown	Unknown_genus_8
3032MC_0218_023_G6	1	0	1	1	1	1	1	1	2	1	0	0	0	0	0	0	0	0	0	0	Bacteroidales	Bacteroides_fragilis
3032MC_0218_023_G7	1	0	1	1	1	1	1	1	2	1	0	0	0	0	0	0	0	0	0	0	Bacteroidales	Bacteroides_fragilis
3032MC_0218_023_G8	1	0	1	1	1	1	1	1	2	1	0	0	0	0	0	0	0	0	0	0	Bacteroidales	Bacteroides_fragilis
3032MC_0218_023_G9	0	0	0	0	0	0	0	1	1	0	1	0	0	0	0	1	0	0	0	0	Unknown	Unknown_genus_17
3032MC_0218_023_H1	1	0	1	1	1	1	1	1	2	1	0	0	0	0	0	0	0	0	0	0	Bacteroidales	Bacteroides_fragilis
3032MC_0218_023_H2	1	0	1	1	1	1	1	1	2	1	0	0	0	0	0	0	0	0	0	0	Bacteroidales	Bacteroides_fragilis
3032MC_0218_023_H3	0	0	0	0	0	0	0	1	1	0	1	0	0	3	0	1	0	0	0	0	Lactobacillales	Lactobacillus_ruminis
3032MC_0218_023_H4	1	0	0	1	1	0	1	1	2	1	0	0	0	0	0	0	0	0	0	0	Unknown	Unknown_genus_31
3032MC_0218_023_H5	1	0	1	1	1	1	1	1	2	1	0	0	0	0	0	0	0	0	0	0	Bacteroidales	Bacteroides_fragilis
3032MC_0218_023_H6	1	0	1	1	1	1	1	1	2	1	0	0	0	0	0	0	0	0	0	0	Bacteroidales	Bacteroides_fragilis
3032MC_0218_023_H7	1	0	1	1	1	1	1	1	2	1	0	0	0	0	0	0	0	0	0	0	Bacteroidales	Bacteroides_fragilis
3032MC_0218_023_H8	1	0	1	1	1	1	1	1	2	1	0	0	0	0	0	0	0	0	0	0	Bacteroidales	Bacteroides_fragilis
3032MC_0218_023_H9	2	0	0	1	1	1	1	1	1	0	1	1	0	0	0	0	0	0	0	0	Fusobacteriales	Fusobacterium_gonidiaformans
3050YG_0918_062_A10	1	0	0	1	1	1	1	1	2	0	1	0	0	0	0	0	0	1	0	0	Bacteroidales	g__Prevotella(UID2724)
3050YG_0918_062_A12	1	0	0	0	1	1	1	1	1	0	1	0	0	0	0	0	0	1	0	0	Clostridiales	o__Clostridiales(UID1212)
3050YG_0918_062_A1	1	0	0	1	1	1	1	1	2	0	1	0	0	0	0	0	0	1	0	0	Bacteroidales	g__Prevotella(UID2724)
3050YG_0918_062_A2	0	0	0	0	0	0	0	1	1	0	1	0	0	0	0	0	0	0	0	0	Clostridiales	f__Lachnospiraceae(UID1286)
3050YG_0918_062_A3	0	0	0	0	0	0	0	1	1	1	1	0	0	1	1	0	0	1	0	0	Lactobacillales	o__Lactobacillales(UID544)
3050YG_0918_062_A4	1	0	0	0	1	1	1	1	2	0	1	0	0	0	0	0	0	1	0	0	Bacteroidales	g__Prevotella(UID2724)
3050YG_0918_062_A5	1	0	1	1	1	1	1	1	1	1	0	0	0	1	0	0	0	0	0	0	unknown	p__Firmicutes(UID1022)
3050YG_0918_062_A6	0	0	0	0	0	0	0	1	1	1	1	0	0	1	1	0	0	0	0	0	Lactobacillales	o__Lactobacillales(UID544)
3050YG_0918_062_A7	1	0	0	1	1	1	1	1	2	0	1	0	0	0	0	0	0	1	0	0	Bacteroidales	g__Prevotella(UID2724)
3050YG_0918_062_A8	1	0	0	0	0	0	0	1	0	0	1	0	0	0	0	1	0	0	0	1	Clostridiales	o__Clostridiales(UID1226)
3050YG_0918_062_A9	1	0	0	0	0	0	0	1	1	0	1	0	0	0	0	1	0	0	0	1	Clostridiales	f__Lachnospiraceae(UID1256)
3050YG_0918_062_B10	1	0	0	0	0	0	0	1	1	0	1	0	0	0	0	1	0	0	0	0	Clostridiales	f__Lachnospiraceae(UID1286)
3050YG_0918_062_B11	1	0	0	0	0	0	0	1	1	0	1	0	0	0	0	1	0	0	0	1	Clostridiales	f__Lachnospiraceae(UID1256)
3050YG_0918_062_B12	0	0	0	0	1	1	1	1	2	0	1	0	0	0	0	0	0	1	0	0	Bacteroidales	g__Prevotella(UID2724)
3050YG_0918_062_B1	1	0	0	0	1	1	1	1	2	0	1	0	0	0	0	0	0	0	0	0	Bacteroidales	g__Prevotella(UID2724)
3050YG_0918_062_B2	1	0	0	0	1	1	1	1	2	0	1	0	0	0	0	0	0	0	0	0	Bacteroidales	g__Prevotella(UID2724)
3050YG_0918_062_B4	1	0	1	1	1	1	1	1	1	1	0	0	0	1	0	0	0	0	0	0	unknown	p__Firmicutes(UID1022)
3050YG_0918_062_B5	1	0	0	1	1	1	1	1	2	0	1	0	0	0	0	0	0	0	0	0	Bacteroidales	g__Prevotella(UID2724)
3050YG_0918_062_B6	1	0	0	0	0	0	0	1	1	0	1	0	0	1	0	1	0	0	0	1	Clostridiales	f__Lachnospiraceae(UID1256)
3050YG_0918_062_B7	1	0	0	0	1	1	0	1	2	0	1	0	0	0	0	0	0	1	0	0	Bacteroidales	g__Prevotella(UID2724)
3050YG_0918_062_B8	1	0	1	1	1	1	1	1	1	1	0	0	0	1	0	0	0	0	0	0	unknown	p__Firmicutes(UID1022)
3050YG_0918_062_B9	0	0	0	0	0	0	0	1	1	0	1	0	1	0	0	0	0	0	0	0	Clostridiales	o__Clostridiales(UID1212)
3050YG_0918_062_C10	1	0	0	1	1	1	1	1	1	0	1	0	0	0	0	0	0	0	0	0	Clostridiales	o__Clostridiales(UID1212)
3050YG_0918_062_C11	0	0	0	0	0	0	0	1	1	0	1	0	1	0	0	0	0	0	0	0	Clostridiales	o__Clostridiales(UID1212)
3050YG_0918_062_C12	1	0	0	0	1	1	1	1	1	0	1	0	0	0	0	0	0	1	0	0	Clostridiales	o__Clostridiales(UID1212)
3050YG_0918_062_C1	1	0	0	0	0	0	0	1	1	0	1	0	0	1	1	1	0	0	0	1	Clostridiales	o__Clostridiales(UID1226)
3050YG_0918_062_C2	1	0	0	0	1	1	1	1	1	0	1	0	0	1	1	1	0	0	0	0	Lactobacillales	o__Lactobacillales(UID544)
3050YG_0918_062_C3	1	0	0	0	1	1	1	1	2	0	1	0	0	0	0	0	0	1	0	0	Bacteroidales	g__Prevotella(UID2724)
3050YG_0918_062_C4	1	0	1	0	1	1	1	1	1	0	1	0	0	1	1	1	0	0	0	0	Lactobacillales	o__Lactobacillales(UID544)
3050YG_0918_062_C5	0	0	0	0	0	0	0	1	1	0	1	0	0	0	0	1	0	1	0	0	unknown	k__Bacteria(UID2372)
3050YG_0918_062_C6	1	0	0	0	0	0	0	1	1	0	1	0	0	1	0	0	0	1	0	0	unknown	p__Actinobacteria(UID2112)
3050YG_0918_062_C7	0	0	0	0	0	0	0	1	1	0	1	0	0	0	0	1	0	1	0	0	unknown	k__Bacteria(UID2372)
3050YG_0918_062_C9	1	0	1	1	1	1	1	1	1	1	0	0	0	1	0	0	0	0	0	0	unknown	p__Firmicutes(UID1022)
3050YG_0918_062_D10	1	0	0	1	1	1	1	1	2	0	1	0	0	0	0	0	0	1	0	0	Bacteroidales	o__Bacteroidales(UID2657)
3050YG_0918_062_D12	0	0	0	0	0	0	0	1	1	0	1	0	0	0	0	1	0	1	0	0	unknown	k__Bacteria(UID2372)
3050YG_0918_062_D1	1	0	0	0	1	1	1	1	2	0	1	0	0	0	0	0	0	1	0	0	Bacteroidales	g__Prevotella(UID2724)
3050YG_0918_062_D2	1	0	0	0	0	0	0	1	1	0	1	0	0	1	0	0	0	1	0	0	unknown	p__Actinobacteria(UID2112)
3050YG_0918_062_D3	1	0	0	0	0	0	0	1	1	0	1	0	0	0	0	1	0	0	0	0	Clostridiales	f__Lachnospiraceae(UID1286)
3050YG_0918_062_D4	1	0	0	1	1	1	1	1	2	0	1	0	0	0	0	0	0	0	0	0	Bacteroidales	g__Prevotella(UID2724)
3050YG_0918_062_D5	1	0	0	0	0	0	0	1	1	0	1	0	0	1	0	0	0	1	0	0	unknown	p__Actinobacteria(UID2112)
3050YG_0918_062_D6	0	0	0	0	1	1	1	1	1	0	1	0	0	0	0	0	0	0	0	1	Clostridiales	o__Clostridiales(UID1212)
3050YG_0918_062_D7	1	0	0	0	1	1	1	1	2	0	1	0	0	0	0	0	0	0	0	0	Bacteroidales	g__Prevotella(UID2724)
3050YG_0918_062_D8	1	0	0	0	1	1	1	1	2	0	1	0	0	0	0	0	0	1	0	0	Bacteroidales	g__Prevotella(UID2724)
3050YG_0918_062_D9	1	0	0	1	1	1	1	1	2	0	1	0	0	0	0	0	0	1	0	0	Bacteroidales	g__Prevotella(UID2724)
3050YG_0918_062_E10	0	0	0	0	0	0	0	1	1	0	1	0	0	0	0	1	0	0	0	0	Clostridiales	o__Clostridiales(UID1212)
3050YG_0918_062_E11	1	0	0	1	1	1	1	1	2	0	1	0	0	0	0	0	0	1	0	0	Bacteroidales	g__Prevotella(UID2724)
3050YG_0918_062_E12	1	0	0	1	1	1	1	1	2	0	1	0	0	0	0	0	0	1	0	0	Bacteroidales	g__Prevotella(UID2724)
3050YG_0918_062_E1	1	0	0	0	1	1	1	1	2	0	1	0	0	0	0	0	0	1	0	0	Bacteroidales	g__Prevotella(UID2724)
3050YG_0918_062_E2	0	0	0	0	0	0	0	1	1	1	1	0	0	1	1	0	0	0	0	0	Lactobacillales	o__Lactobacillales(UID544)
3050YG_0918_062_E3	1	0	0	0	0	0	0	1	1	0	1	0	0	0	0	1	0	0	0	0	Clostridiales	f__Lachnospiraceae(UID1286)
3050YG_0918_062_E4	0	0	1	1	1	1	1	1	1	1	0	0	0	1	0	0	0	0	0	0	unknown	p__Firmicutes(UID1022)
3050YG_0918_062_E5	1	0	0	0	0	0	0	1	1	0	1	0	0	1	1	1	0	0	0	1	Clostridiales	o__Clostridiales(UID1226)
3050YG_0918_062_E6	1	0	0	0	1	1	1	1	2	0	1	0	0	0	0	0	0	1	0	0	Bacteroidales	g__Prevotella(UID2724)
3050YG_0918_062_E7	1	0	1	1	1	1	1	1	1	1	0	0	0	1	0	0	0	0	0	0	unknown	p__Firmicutes(UID1022)
3050YG_0918_062_E8	1	0	0	1	1	1	1	1	2	0	1	0	0	0	0	0	0	1	0	0	Bacteroidales	g__Prevotella(UID2724)
3050YG_0918_062_E9	0	0	1	1	1	1	1	1	1	1	0	0	0	1	0	0	0	0	0	0	unknown	p__Firmicutes(UID1022)
3050YG_0918_062_F10	1	0	0	0	1	1	1	1	2	0	1	0	0	0	0	0	0	1	0	0	Bacteroidales	g__Prevotella(UID2724)
3050YG_0918_062_F11	0	0	0	0	0	0	0	1	1	0	1	0	0	1	0	0	0	1	0	0	unknown	p__Actinobacteria(UID2112)
3050YG_0918_062_F12	1	0	1	1	1	1	1	1	1	1	0	0	0	1	0	0	0	0	0	0	unknown	p__Firmicutes(UID1022)
3050YG_0918_062_F2	1	0	0	1	1	1	1	1	2	0	1	0	0	0	0	0	0	0	0	0	Bacteroidales	g__Prevotella(UID2724)
3050YG_0918_062_F4	1	0	0	1	1	1	1	1	2	0	1	0	0	0	0	0	0	1	0	0	Bacteroidales	g__Prevotella(UID2724)
3050YG_0918_062_F5	1	0	0	1	1	1	1	1	2	0	1	0	0	0	0	0	0	1	0	0	Bacteroidales	g__Prevotella(UID2724)
3050YG_0918_062_F6	1	0	0	0	0	0	0	1	1	1	1	0	0	1	1	1	1	0	0	1	Clostridiales	f__Lachnospiraceae(UID1256)
3050YG_0918_062_F7	1	0	0	1	1	1	1	1	2	0	1	0	0	0	0	0	0	1	0	0	Bacteroidales	g__Prevotella(UID2724)
3050YG_0918_062_F8	1	0	1	1	1	1	1	1	1	1	0	0	0	1	0	0	0	0	0	0	unknown	p__Firmicutes(UID1022)
3050YG_0918_062_F9	0	0	0	0	0	0	0	1	1	0	1	0	1	0	0	0	0	0	0	0	Clostridiales	o__Clostridiales(UID1212)
3050YG_0918_062_G10	1	0	0	0	0	0	0	1	1	0	1	0	0	1	1	1	0	0	0	1	Clostridiales	o__Clostridiales(UID1226)
3050YG_0918_062_G11	1	0	0	0	0	0	0	1	1	0	1	0	1	0	0	0	0	0	0	0	Clostridiales	o__Clostridiales(UID1120)
3050YG_0918_062_G12	0	0	0	0	0	0	0	1	1	0	1	0	1	0	0	0	0	0	0	0	Clostridiales	o__Clostridiales(UID1212)
3050YG_0918_062_G1	1	0	0	0	0	0	0	1	1	0	1	0	0	0	0	1	0	0	0	0	Clostridiales	f__Lachnospiraceae(UID1286)
3050YG_0918_062_G2	1	0	1	1	1	1	1	1	2	1	0	0	0	1	0	0	0	0	0	0	unknown	p__Firmicutes(UID1022)
3050YG_0918_062_G3	1	0	0	0	0	0	0	1	1	1	1	0	0	1	1	1	1	0	0	1	Clostridiales	f__Lachnospiraceae(UID1256)
3050YG_0918_062_G4	0	0	0	0	1	1	1	1	1	0	1	0	0	0	0	0	0	0	0	1	Clostridiales	o__Clostridiales(UID1212)
3050YG_0918_062_G5	1	0	0	1	1	1	1	1	2	0	1	0	0	0	0	0	0	0	0	0	Bacteroidales	g__Prevotella(UID2724)
3050YG_0918_062_G6	1	0	0	0	0	0	0	1	1	0	1	0	0	0	0	1	0	0	0	1	Clostridiales	o__Clostridiales(UID1226)
3050YG_0918_062_G7	1	0	0	1	1	1	1	1	2	0	1	0	0	0	0	0	0	0	0	0	Bacteroidales	g__Prevotella(UID2724)
3050YG_0918_062_G8	1	0	0	1	1	1	1	1	2	1	0	0	0	0	0	0	0	1	0	0	Bacteroidales	g__Prevotella(UID2724)
3050YG_0918_062_G9	1	0	0	0	1	1	1	1	2	0	1	0	0	0	0	0	0	1	0	0	Bacteroidales	g__Prevotella(UID2724)
3050YG_0918_062_H10	1	0	0	0	1	1	1	1	2	0	1	0	0	0	0	0	0	1	0	0	Bacteroidales	g__Prevotella(UID2724)
3050YG_0918_062_H11	1	0	0	0	1	1	1	1	2	0	1	0	0	0	0	0	0	0	0	0	Bacteroidales	g__Prevotella(UID2724)
3050YG_0918_062_H1	1	0	0	0	1	1	1	1	2	0	1	0	0	0	0	0	0	1	0	0	Bacteroidales	g__Prevotella(UID2724)
3050YG_0918_062_H2	0	0	0	0	0	0	0	1	1	1	1	0	0	1	1	0	0	0	0	0	Lactobacillales	o__Lactobacillales(UID544)
3050YG_0918_062_H3	1	0	0	1	1	1	1	1	2	0	1	0	0	0	0	0	0	1	0	0	Bacteroidales	g__Prevotella(UID2724)
3050YG_0918_062_H6	1	0	0	0	1	1	1	1	2	0	1	0	0	0	0	0	0	1	0	0	Bacteroidales	g__Prevotella(UID2724)
3050YG_0918_062_H7	0	0	0	0	0	0	0	1	1	0	1	0	0	0	0	0	0	0	0	0	Clostridiales	f__Lachnospiraceae(UID1286)
3050YG_0918_062_H8	1	0	0	1	1	1	1	1	2	0	1	0	0	0	0	0	0	1	0	0	Bacteroidales	g__Prevotella(UID2724)
3050YG_0918_062_H9	0	0	0	0	0	0	0	1	1	0	1	0	0	0	0	1	0	0	0	0	unknown	k__Bacteria(UID2372)
3219KR_0218_022_A10	0	0	0	0	0	0	0	1	1	0	1	0	0	3	0	1	0	0	0	0	Lactobacillales	Lactobacillus_ruminis
3219KR_0218_022_A11	0	0	0	0	0	0	0	1	1	0	1	0	0	3	0	1	0	0	0	0	Lactobacillales	Lactobacillus_ruminis
3219KR_0218_022_A12	1	0	0	1	0	0	0	1	2	1	0	0	0	0	0	0	0	1	1	0	Bacteroidales	Alistipes_shahii
3219KR_0218_022_A1	1	0	0	0	1	1	1	1	2	0	1	0	0	0	0	0	0	1	0	0	Bacteroidales	Prevotella_copri
3219KR_0218_022_A2	0	0	0	0	0	0	0	1	1	0	1	0	0	3	0	1	0	0	0	0	Lactobacillales	Lactobacillus_ruminis
3219KR_0218_022_A3	1	0	0	1	0	0	0	1	2	1	0	0	0	0	0	0	0	1	1	0	Bacteroidales	Alistipes_shahii
3219KR_0218_022_A4	1	0	0	1	0	0	0	1	2	1	0	0	0	0	0	0	0	1	1	0	Bacteroidales	Alistipes_shahii
3219KR_0218_022_A5	0	0	0	0	0	0	0	1	1	0	1	0	0	3	0	1	0	0	0	0	Lactobacillales	Lactobacillus_ruminis
3219KR_0218_022_A6	1	0	0	0	0	0	0	1	1	0	1	0	0	3	0	1	0	1	0	0	Lactobacillales	Lactobacillus_ruminis
3219KR_0218_022_A7	0	0	0	0	0	0	0	1	1	0	1	0	0	3	0	1	0	0	0	0	Lactobacillales	Lactobacillus_ruminis
3219KR_0218_022_A8	1	0	0	1	1	1	1	1	2	0	1	0	0	0	0	0	0	0	0	0	Unknown	Unknown_genus_37
3219KR_0218_022_B10	0	0	0	0	0	0	0	1	1	0	1	0	0	3	0	1	0	0	0	0	Lactobacillales	Lactobacillus_ruminis
3219KR_0218_022_B11	0	0	0	0	0	0	0	1	1	0	1	0	0	3	0	1	0	0	0	0	Lactobacillales	Lactobacillus_ruminis
3219KR_0218_022_B12	0	0	0	0	0	0	0	1	1	0	1	0	0	3	0	1	0	0	0	0	Lactobacillales	Lactobacillus_ruminis
3219KR_0218_022_B1	1	0	0	1	0	0	0	1	2	1	0	0	0	0	0	0	0	1	1	0	Bacteroidales	Alistipes_shahii
3219KR_0218_022_B2	0	0	0	0	0	0	0	1	1	0	1	0	0	3	0	1	0	0	0	0	Lactobacillales	Lactobacillus_ruminis
3219KR_0218_022_B3	1	0	0	1	0	0	0	1	2	1	0	0	0	0	0	0	0	1	1	0	Bacteroidales	Alistipes_shahii
3219KR_0218_022_B4	0	0	0	0	0	0	0	1	1	0	1	0	0	3	0	1	0	0	0	0	Lactobacillales	Lactobacillus_ruminis
3219KR_0218_022_B5	0	0	0	0	0	0	0	1	1	0	1	0	0	3	0	1	0	0	0	0	Lactobacillales	Lactobacillus_ruminis
3219KR_0218_022_B6	0	0	0	0	0	0	0	1	1	0	1	0	0	3	0	1	0	0	0	0	Lactobacillales	Lactobacillus_ruminis
3219KR_0218_022_B7	1	0	0	1	0	0	0	1	2	1	0	0	0	0	0	0	0	1	1	0	Bacteroidales	Alistipes_shahii
3219KR_0218_022_B8	0	0	0	0	0	0	0	1	1	0	1	0	0	3	0	1	0	0	0	0	Lactobacillales	Lactobacillus_ruminis
3219KR_0218_022_B9	1	0	0	1	0	0	0	1	2	1	0	0	0	0	0	0	0	1	1	0	Bacteroidales	Alistipes_shahii
3219KR_0218_022_C10	1	0	0	0	1	1	1	1	2	0	1	0	0	0	0	0	0	1	0	0	Bacteroidales	Prevotella_sp.1
3219KR_0218_022_C11	0	0	0	0	0	0	0	1	1	0	1	0	0	3	0	1	0	0	0	0	Lactobacillales	Lactobacillus_ruminis
3219KR_0218_022_C12	0	0	0	0	0	0	0	0	0	0	0	0	0	0	0	0	0	0	0	0	Lactobacillales	Lactobacillus_ruminis
3219KR_0218_022_C1	0	0	0	0	0	0	0	1	1	0	1	0	0	3	0	1	0	0	1	0	Lactobacillales	Lactobacillus_ruminis
3219KR_0218_022_C2	1	0	0	0	1	1	1	1	2	0	1	0	0	0	0	0	0	1	0	0	Bacteroidales	Prevotella_copri
3219KR_0218_022_C3	0	0	0	0	0	0	0	1	1	0	1	0	0	3	0	1	0	0	0	0	Lactobacillales	Lactobacillus_ruminis
3219KR_0218_022_C4	0	0	0	0	0	0	0	1	1	0	1	0	0	3	0	1	0	0	0	0	Lactobacillales	Lactobacillus_ruminis
3219KR_0218_022_C5	1	0	0	1	0	0	0	1	2	1	0	0	0	0	0	0	0	1	1	0	Bacteroidales	Alistipes_shahii
3219KR_0218_022_C6	0	0	0	0	0	0	0	1	1	0	1	0	0	3	0	1	0	0	0	0	Lactobacillales	Lactobacillus_ruminis
3219KR_0218_022_C7	1	0	0	1	1	1	1	1	2	0	1	0	0	0	0	0	0	0	0	0	Unknown	Unknown_genus_37
3219KR_0218_022_C8	0	0	0	0	0	0	0	1	1	0	1	0	0	3	0	1	0	0	0	0	Lactobacillales	Lactobacillus_ruminis
3219KR_0218_022_C9	1	0	0	0	1	1	1	1	2	0	1	0	0	0	0	0	0	1	0	0	Bacteroidales	Prevotella_sp.1
3219KR_0218_022_D10	0	0	0	0	0	0	0	1	1	0	1	0	0	3	0	1	0	0	0	0	Lactobacillales	Lactobacillus_ruminis
3219KR_0218_022_D11	0	0	0	0	0	0	0	1	1	0	1	0	0	3	0	1	0	0	0	0	Lactobacillales	Lactobacillus_ruminis
3219KR_0218_022_D12	0	0	0	0	0	0	0	1	1	0	1	0	0	3	0	1	0	0	0	0	Lactobacillales	Lactobacillus_ruminis
3219KR_0218_022_D1	1	0	0	0	1	1	1	1	2	0	1	0	0	0	0	0	0	1	0	0	Bacteroidales	Prevotella_sp.1
3219KR_0218_022_D2	1	0	0	1	0	0	0	1	2	1	0	0	0	0	0	0	0	1	1	0	Bacteroidales	Alistipes_shahii
3219KR_0218_022_D3	1	0	0	1	0	0	0	1	2	1	0	0	0	0	0	0	0	1	1	0	Bacteroidales	Alistipes_shahii
3219KR_0218_022_D4	1	0	0	1	0	0	0	1	2	1	0	0	0	0	0	0	0	1	1	0	Bacteroidales	Alistipes_shahii
3219KR_0218_022_D5	1	0	0	1	0	0	0	1	2	1	0	0	0	0	0	0	0	1	1	0	Bacteroidales	Alistipes_shahii
3219KR_0218_022_D6	1	0	0	0	1	1	1	1	2	0	1	0	0	0	0	0	0	1	0	0	Bacteroidales	Prevotella_sp.1
3219KR_0218_022_D7	0	0	0	0	0	0	0	1	1	0	1	0	0	3	0	1	0	0	0	0	Lactobacillales	Lactobacillus_ruminis
3219KR_0218_022_D8	0	0	0	0	0	0	0	1	1	0	1	0	0	3	0	1	0	0	0	0	Lactobacillales	Lactobacillus_ruminis
3219KR_0218_022_D9	0	0	0	0	0	0	0	1	1	0	1	0	0	3	0	1	0	0	0	0	Lactobacillales	Lactobacillus_ruminis
3219KR_0218_022_E10	0	0	0	0	0	0	0	1	1	0	1	0	0	3	0	1	0	0	0	0	Lactobacillales	Lactobacillus_ruminis
3219KR_0218_022_E11	1	0	0	0	1	1	1	1	2	0	1	0	0	0	0	0	0	1	0	0	Bacteroidales	Prevotella_sp.1
3219KR_0218_022_E12	1	0	0	0	1	1	1	1	2	0	1	0	0	0	0	0	0	1	0	0	Bacteroidales	Prevotella_copri
3219KR_0218_022_E1	1	0	0	0	1	1	1	1	2	0	1	0	0	0	0	0	0	1	0	0	Bacteroidales	Prevotella_sp.1
3219KR_0218_022_E2	1	0	0	0	1	1	1	1	2	0	1	0	0	0	0	0	0	1	0	0	Bacteroidales	Prevotella_sp.1
3219KR_0218_022_E3	0	0	0	0	0	0	0	1	1	0	1	0	0	3	0	1	0	0	0	0	Lactobacillales	Lactobacillus_ruminis
3219KR_0218_022_E4	0	0	0	0	0	0	0	1	1	0	1	0	0	3	0	1	0	0	0	0	Lactobacillales	Lactobacillus_ruminis
3219KR_0218_022_E5	0	0	0	0	0	0	0	1	1	0	1	0	0	3	0	1	0	0	0	0	Lactobacillales	Lactobacillus_ruminis
3219KR_0218_022_E6	0	0	0	0	0	0	0	1	1	0	1	0	0	3	0	1	0	0	0	0	Lactobacillales	Lactobacillus_ruminis
3219KR_0218_022_E7	0	0	0	0	0	0	0	1	1	0	1	0	0	3	0	1	0	0	0	0	Lactobacillales	Lactobacillus_ruminis
3219KR_0218_022_E8	1	0	0	1	0	0	0	1	2	1	0	0	0	0	0	0	0	1	1	0	Bacteroidales	Alistipes_shahii
3219KR_0218_022_E9	1	0	0	0	1	1	1	1	2	0	1	0	0	0	0	0	0	1	0	0	Bacteroidales	Prevotella_sp.1
3219KR_0218_022_F10	0	0	0	0	0	0	0	1	1	0	1	0	0	3	0	1	0	0	0	0	Lactobacillales	Lactobacillus_ruminis
3219KR_0218_022_F11	0	0	0	0	0	0	0	1	1	0	1	0	0	3	0	1	0	0	0	0	Lactobacillales	Lactobacillus_ruminis
3219KR_0218_022_F12	0	0	0	0	0	0	0	1	1	0	1	0	0	3	0	1	0	0	0	0	Lactobacillales	Lactobacillus_ruminis
3219KR_0218_022_F1	0	0	0	0	0	0	0	1	1	0	1	0	0	3	0	1	0	0	0	0	Lactobacillales	Lactobacillus_ruminis
3219KR_0218_022_F2	1	0	0	0	1	1	1	1	2	0	1	0	0	0	0	0	0	1	0	0	Bacteroidales	Prevotella_sp.1
3219KR_0218_022_F3	0	0	0	0	0	0	0	1	1	0	1	0	0	3	0	1	0	0	0	0	Lactobacillales	Lactobacillus_ruminis
3219KR_0218_022_F4	0	0	0	0	0	0	0	1	1	0	1	0	0	3	0	1	0	0	0	0	Lactobacillales	Lactobacillus_ruminis
3219KR_0218_022_F5	0	0	0	0	0	0	0	1	1	0	1	0	0	3	0	1	0	0	0	0	Lactobacillales	Lactobacillus_ruminis
3219KR_0218_022_F6	1	0	0	1	0	0	0	1	2	1	0	0	0	0	0	0	0	1	1	0	Bacteroidales	Alistipes_shahii
3219KR_0218_022_F7	0	0	0	0	0	0	0	1	1	0	1	0	0	3	0	1	0	0	0	0	Lactobacillales	Lactobacillus_ruminis
3219KR_0218_022_F8	1	0	0	0	1	1	1	1	2	0	1	0	0	0	0	0	0	1	0	0	Bacteroidales	Prevotella_sp.1
3219KR_0218_022_F9	0	0	0	0	0	0	0	1	1	0	1	0	0	3	0	1	0	0	0	0	Lactobacillales	Lactobacillus_ruminis
3219KR_0218_022_G10	0	0	0	0	0	0	0	1	1	0	1	0	0	3	0	1	0	0	0	0	Lactobacillales	Lactobacillus_ruminis
3219KR_0218_022_G12	0	0	0	0	0	0	0	1	1	0	1	0	0	3	0	1	0	0	0	0	Lactobacillales	Lactobacillus_ruminis
3219KR_0218_022_G1	0	0	0	0	0	0	0	1	1	0	1	0	0	3	0	1	0	0	0	0	Lactobacillales	Lactobacillus_ruminis
3219KR_0218_022_G2	0	0	0	0	0	0	0	1	1	0	1	0	0	3	0	1	0	0	0	0	Lactobacillales	Lactobacillus_ruminis
3219KR_0218_022_G3	0	0	0	0	0	0	0	1	1	0	1	0	0	3	0	1	0	0	0	0	Lactobacillales	Lactobacillus_ruminis
3219KR_0218_022_G4	0	0	0	0	0	0	0	1	1	0	1	0	0	3	0	1	0	0	0	0	Lactobacillales	Lactobacillus_ruminis
3219KR_0218_022_G5	0	0	0	0	0	0	0	1	1	0	1	0	0	3	0	1	0	0	0	0	Lactobacillales	Lactobacillus_ruminis
3219KR_0218_022_G6	1	0	0	1	0	0	0	1	2	1	0	0	0	0	0	0	0	1	1	0	Bacteroidales	Alistipes_shahii
3219KR_0218_022_G7	0	0	0	0	0	0	0	1	1	0	1	0	0	3	0	1	0	0	0	0	Lactobacillales	Lactobacillus_ruminis
3219KR_0218_022_G8	0	0	0	0	0	0	0	1	1	0	1	0	0	3	0	1	0	0	0	0	Lactobacillales	Lactobacillus_ruminis
3219KR_0218_022_G9	0	0	0	0	0	0	0	1	1	0	1	0	0	3	0	1	0	0	0	0	Lactobacillales	Lactobacillus_ruminis
3219KR_0218_022_H10	1	0	0	1	0	0	0	1	2	1	0	0	0	0	0	0	0	1	1	0	Bacteroidales	Alistipes_shahii
3219KR_0218_022_H11	1	0	0	0	1	1	1	1	2	0	1	0	0	0	0	0	0	1	0	0	Bacteroidales	Prevotella_copri
3219KR_0218_022_H1	0	0	0	0	0	0	0	1	1	0	1	0	0	3	0	1	0	0	0	0	Lactobacillales	Lactobacillus_ruminis
3219KR_0218_022_H2	0	0	0	0	0	0	0	1	1	0	1	0	0	3	0	1	0	0	0	0	Lactobacillales	Lactobacillus_ruminis
3219KR_0218_022_H3	1	0	0	0	1	1	1	1	2	0	1	0	0	0	0	0	0	1	0	0	Bacteroidales	Prevotella_sp.1
3219KR_0218_022_H4	0	0	0	0	0	0	0	1	1	0	1	0	0	3	0	1	0	0	0	0	Lactobacillales	Lactobacillus_ruminis
3219KR_0218_022_H5	0	0	0	0	0	0	0	1	1	0	1	0	0	3	0	1	0	0	0	0	Lactobacillales	Lactobacillus_ruminis
3219KR_0218_022_H6	0	0	0	0	0	0	0	1	1	0	1	0	0	3	0	1	0	0	0	0	Lactobacillales	Lactobacillus_ruminis
3219KR_0218_022_H7	0	0	0	0	0	0	0	1	1	0	1	0	0	3	0	1	0	0	0	0	Lactobacillales	Lactobacillus_ruminis
3219KR_0218_022_H8	0	0	0	0	0	0	0	1	1	0	1	0	0	3	0	1	0	0	0	0	Lactobacillales	Lactobacillus_ruminis
3219KR_0218_022_H9	0	0	0	0	0	0	0	1	1	0	1	0	0	3	0	1	0	0	0	0	Lactobacillales	Lactobacillus_ruminis
3321JW_0918_034_A10	0	0	0	0	0	0	0	1	1	0	0	0	0	5	0	1	0	1	0	0	Lactobacillales	o__Lactobacillales(UID375)
3321JW_0918_034_A11	1	0	0	0	0	0	0	1	1	0	0	0	0	3	1	0	0	1	0	0	Lactobacillales	o__Lactobacillales(UID462)
3321JW_0918_034_A12	1	0	0	0	0	0	0	1	1	0	0	0	0	3	1	0	0	1	0	0	Lactobacillales	o__Lactobacillales(UID462)
3321JW_0918_034_A1	1	0	1	1	1	1	1	1	2	1	0	0	0	0	0	0	0	1	1	0	Bacteroidales	o__Bacteroidales(UID2621)
3321JW_0918_034_A3	1	0	1	1	1	1	1	1	2	1	0	0	0	0	0	0	0	0	0	0	Bacteroidales	o__Bacteroidales(UID2657)
3321JW_0918_034_A4	1	0	1	1	1	1	1	1	2	1	0	0	0	0	0	0	0	1	1	0	Bacteroidales	o__Bacteroidales(UID2621)
3321JW_0918_034_A5	1	0	1	1	1	1	1	1	1	1	0	0	0	2	0	0	0	5	0	0	Enterobacterales	f__Enterobacteriaceae(UID5121)
3321JW_0918_034_A6	1	0	1	1	1	1	1	1	1	1	1	0	0	3	0	0	0	2	0	0	Enterobacterales	f__Enterobacteriaceae(UID5124)
3321JW_0918_034_A7	1	0	1	1	1	1	1	1	2	1	0	0	0	0	0	0	0	0	0	0	Bacteroidales	o__Bacteroidales(UID2657)
3321JW_0918_034_A8	1	0	1	1	1	1	1	1	2	1	0	0	0	0	0	0	0	0	0	0	Bacteroidales	o__Bacteroidales(UID2657)
3321JW_0918_034_A9	1	0	1	1	1	1	1	1	2	1	0	0	0	0	0	0	0	0	0	0	Bacteroidales	o__Bacteroidales(UID2657)
3321JW_0918_034_B10	0	0	0	0	0	0	0	1	1	0	0	0	0	5	0	1	0	1	0	0	Lactobacillales	o__Lactobacillales(UID375)
3321JW_0918_034_B11	0	0	0	0	0	0	0	1	1	1	1	0	0	1	1	0	0	1	0	0	Lactobacillales	o__Lactobacillales(UID544)
3321JW_0918_034_B12	0	0	0	0	0	0	0	1	1	0	0	0	0	5	0	1	0	1	0	0	Lactobacillales	o__Lactobacillales(UID375)
3321JW_0918_034_B1	1	0	1	1	1	1	1	1	2	1	0	0	0	0	0	0	0	1	1	0	Bacteroidales	o__Bacteroidales(UID2621)
3321JW_0918_034_B2	1	0	1	1	1	1	1	1	1	1	0	0	0	2	0	0	0	6	0	0	Enterobacterales	f__Enterobacteriaceae(UID5121)
3321JW_0918_034_B3	1	0	1	1	1	1	1	1	2	1	0	0	0	0	0	0	0	0	1	0	Bacteroidales	o__Bacteroidales(UID2657)
3321JW_0918_034_B4	1	0	1	1	1	1	1	1	2	1	0	0	0	0	0	0	0	0	0	0	Bacteroidales	o__Bacteroidales(UID2657)
3321JW_0918_034_B5	1	0	1	1	1	1	1	1	2	1	0	0	0	0	0	0	0	0	0	0	Bacteroidales	o__Bacteroidales(UID2657)
3321JW_0918_034_B7	1	0	0	0	0	0	0	1	0	0	0	0	0	3	1	0	1	1	0	3	Bifidobacteriales	f__Bifidobacteriaceae(UID1462)
3321JW_0918_034_B8	1	0	1	1	1	1	1	1	1	1	0	0	0	2	0	0	0	5	0	0	Enterobacterales	f__Enterobacteriaceae(UID5121)
3321JW_0918_034_B9	1	0	1	0	1	1	1	1	1	1	0	0	0	0	0	0	0	0	0	0	Lactobacillales	g__Streptococcus(UID684)
3321JW_0918_034_C10	1	0	1	1	1	1	1	1	2	1	0	0	0	0	0	0	0	0	0	0	Bacteroidales	o__Bacteroidales(UID2657)
3321JW_0918_034_C11	0	0	0	0	0	0	0	1	1	0	0	0	0	5	0	1	0	1	0	0	Lactobacillales	o__Lactobacillales(UID375)
3321JW_0918_034_C12	0	0	0	0	0	0	0	1	1	1	1	0	0	1	1	0	0	0	0	0	Lactobacillales	o__Lactobacillales(UID544)
3321JW_0918_034_C1	1	0	1	1	1	1	1	1	1	1	0	0	0	0	0	0	0	0	0	0	Bacteroidales	o__Bacteroidales(UID2657)
3321JW_0918_034_C2	1	0	1	1	1	1	1	1	2	1	0	0	0	0	0	0	0	0	0	0	Bacteroidales	o__Bacteroidales(UID2657)
3321JW_0918_034_C3	1	0	1	1	1	1	1	1	2	1	0	0	0	0	0	0	0	0	0	0	Bacteroidales	o__Bacteroidales(UID2657)
3321JW_0918_034_C4	1	0	0	1	1	1	1	1	2	1	0	0	0	0	0	0	0	2	1	0	Bacteroidales	g__Bacteroides(UID2691)
3321JW_0918_034_C5	1	0	1	1	1	1	1	1	2	1	0	0	0	0	0	0	0	0	0	0	Bacteroidales	o__Bacteroidales(UID2657)
3321JW_0918_034_C6	0	0	0	0	0	0	0	1	1	0	1	0	0	0	0	1	0	0	0	0	Lactobacillales	g__Streptococcus(UID559)
3321JW_0918_034_C7	0	0	0	0	0	0	0	1	1	1	1	0	0	1	1	0	0	0	0	0	Lactobacillales	o__Lactobacillales(UID544)
3321JW_0918_034_C9	1	0	1	1	1	1	1	1	2	1	0	0	0	0	0	0	0	0	0	0	Bacteroidales	o__Bacteroidales(UID2657)
3321JW_0918_034_D10	1	0	1	1	1	1	1	1	1	1	0	0	0	2	0	0	0	5	0	0	Enterobacterales	f__Enterobacteriaceae(UID5121)
3321JW_0918_034_D12	0	0	0	0	0	0	0	1	1	1	1	0	0	1	1	0	0	0	0	0	Lactobacillales	o__Lactobacillales(UID544)
3321JW_0918_034_D1	1	0	1	1	1	1	1	1	2	1	0	0	0	0	0	0	0	1	1	0	Bacteroidales	o__Bacteroidales(UID2621)
3321JW_0918_034_D2	1	0	1	1	1	1	1	1	2	1	0	0	0	0	0	0	0	1	1	0	Bacteroidales	o__Bacteroidales(UID2621)
3321JW_0918_034_D3	1	0	0	1	1	1	1	1	2	1	0	0	0	0	0	0	0	2	1	0	Bacteroidales	g__Bacteroides(UID2691)
3321JW_0918_034_D5	1	0	1	1	1	1	1	1	2	1	0	0	0	0	0	0	0	0	0	0	Bacteroidales	o__Bacteroidales(UID2657)
3321JW_0918_034_D6	0	0	0	0	0	0	0	1	1	0	1	0	0	0	0	0	0	0	0	0	Lactobacillales	g__Streptococcus(UID559)
3321JW_0918_034_D7	1	0	1	1	1	1	1	1	1	1	1	0	0	3	0	0	0	2	0	0	Enterobacterales	f__Enterobacteriaceae(UID5124)
3321JW_0918_034_D8	1	0	1	1	1	1	1	1	1	1	1	0	0	3	0	0	0	2	0	0	Enterobacterales	f__Enterobacteriaceae(UID5124)
3321JW_0918_034_D9	2	0	1	1	1	1	1	1	1	1	1	0	0	1	0	0	0	5	0	0	Enterobacterales	f__Enterobacteriaceae(UID5121)
3321JW_0918_034_E10	1	0	1	1	1	1	1	1	2	1	0	0	0	0	0	0	0	0	0	0	Bacteroidales	o__Bacteroidales(UID2657)
3321JW_0918_034_E11	1	0	0	0	0	0	0	1	1	0	0	0	0	3	1	0	0	1	0	0	Lactobacillales	o__Lactobacillales(UID462)
3321JW_0918_034_E12	1	0	1	1	1	1	1	1	2	0	1	0	0	0	0	0	0	1	3	0	Bacteroidales	o__Bacteroidales(UID2657)
3321JW_0918_034_E1	1	0	1	1	1	1	1	1	2	1	0	0	0	0	0	0	0	1	1	0	Bacteroidales	o__Bacteroidales(UID2621)
3321JW_0918_034_E2	1	0	1	1	1	1	1	1	1	1	0	0	0	0	0	0	0	0	0	0	Bacteroidales	o__Bacteroidales(UID2657)
3321JW_0918_034_E3	0	0	0	0	0	0	0	1	1	0	1	0	0	0	0	1	0	0	0	0	Lactobacillales	g__Streptococcus(UID559)
3321JW_0918_034_E4	1	0	1	1	1	1	1	1	2	1	0	0	0	0	0	0	0	0	0	0	Bacteroidales	o__Bacteroidales(UID2657)
3321JW_0918_034_E5	1	0	1	0	2	1	1	1	1	0	1	0	0	1	1	0	0	0	0	0	Lactobacillales	o__Lactobacillales(UID544)
3321JW_0918_034_E6	1	0	1	0	1	1	1	1	1	1	0	0	0	0	0	0	0	0	0	0	Lactobacillales	g__Streptococcus(UID684)
3321JW_0918_034_E9	1	0	1	1	1	1	1	1	1	1	1	0	0	3	0	0	0	2	0	0	Enterobacterales	f__Enterobacteriaceae(UID5124)
3321JW_0918_034_F11	0	0	0	0	0	0	0	1	1	1	1	0	0	1	1	0	0	1	0	0	Lactobacillales	o__Lactobacillales(UID544)
3321JW_0918_034_F12	1	0	0	0	0	0	0	1	1	0	0	0	0	4	1	0	0	1	0	0	Lactobacillales	o__Lactobacillales(UID462)
3321JW_0918_034_F1	1	0	1	1	1	1	1	1	2	1	0	0	0	0	0	0	0	0	0	0	Bacteroidales	o__Bacteroidales(UID2657)
3321JW_0918_034_F2	1	0	0	1	1	1	1	1	2	0	1	0	0	0	0	0	0	2	1	0	Bacteroidales	g__Bacteroides(UID2691)
3321JW_0918_034_F3	1	0	1	1	1	1	1	1	2	1	0	0	0	0	0	0	0	0	0	0	Bacteroidales	o__Bacteroidales(UID2657)
3321JW_0918_034_F4	1	0	0	1	1	1	1	1	2	1	0	0	0	0	0	0	0	0	0	0	Bacteroidales	o__Bacteroidales(UID2657)
3321JW_0918_034_F5	1	0	1	1	1	1	1	1	1	1	1	0	0	3	0	0	0	2	0	0	Enterobacterales	f__Enterobacteriaceae(UID5124)
3321JW_0918_034_F6	1	0	1	1	1	1	1	1	1	1	1	0	0	3	0	0	0	2	0	0	Enterobacterales	f__Enterobacteriaceae(UID5124)
3321JW_0918_034_F8	0	0	0	0	0	0	0	1	1	1	1	0	0	1	1	0	0	0	0	0	Lactobacillales	o__Lactobacillales(UID544)
3321JW_0918_034_F9	1	0	1	1	1	1	1	1	1	1	0	0	0	2	0	0	0	5	0	0	Enterobacterales	f__Enterobacteriaceae(UID5121)
3321JW_0918_034_G11	1	0	1	1	1	1	1	1	2	1	0	0	0	0	0	0	0	0	0	0	Bacteroidales	o__Bacteroidales(UID2657)
3321JW_0918_034_G12	1	0	0	0	0	0	0	1	1	0	0	0	0	3	1	0	0	1	0	0	Lactobacillales	o__Lactobacillales(UID462)
3321JW_0918_034_G1	1	0	0	1	1	1	1	1	2	0	1	0	0	0	0	0	0	2	1	0	Bacteroidales	g__Bacteroides(UID2691)
3321JW_0918_034_G2	1	0	0	1	1	1	1	1	2	1	0	0	0	0	0	0	0	0	0	0	Bacteroidales	o__Bacteroidales(UID2657)
3321JW_0918_034_G3	1	0	1	1	1	1	1	1	2	1	0	0	0	0	0	0	0	0	0	0	Bacteroidales	o__Bacteroidales(UID2657)
3321JW_0918_034_G4	1	0	0	1	1	1	1	1	2	1	0	0	0	0	0	0	0	2	1	0	Bacteroidales	g__Bacteroides(UID2691)
3321JW_0918_034_G5	1	0	1	1	1	1	1	1	2	1	0	0	0	0	0	0	0	0	0	0	Bacteroidales	o__Bacteroidales(UID2657)
3321JW_0918_034_G6	1	0	0	0	0	0	0	1	2	0	0	0	0	4	1	0	0	1	0	0	Lactobacillales	o__Lactobacillales(UID462)
3321JW_0918_034_G7	0	0	0	0	0	0	0	1	1	1	1	0	0	1	1	0	0	0	0	0	Lactobacillales	o__Lactobacillales(UID544)
3321JW_0918_034_G8	1	0	1	1	1	1	1	1	1	1	1	0	0	3	0	0	0	2	0	0	Enterobacterales	f__Enterobacteriaceae(UID5124)
3321JW_0918_034_G9	1	0	1	1	1	1	1	1	1	1	0	0	0	2	0	0	0	6	0	0	Enterobacterales	f__Enterobacteriaceae(UID5121)
3321JW_0918_034_H10	1	0	1	1	1	1	1	1	1	1	1	0	0	3	0	0	0	2	0	0	Enterobacterales	f__Enterobacteriaceae(UID5124)
3321JW_0918_034_H11	1	0	0	0	0	0	0	1	1	0	0	0	0	4	1	0	0	1	0	0	Lactobacillales	o__Lactobacillales(UID462)
3321JW_0918_034_H1	1	0	1	1	1	1	1	1	2	1	0	0	0	0	0	0	0	1	1	0	Bacteroidales	o__Bacteroidales(UID2621)
3321JW_0918_034_H2	1	0	1	1	1	1	1	1	2	1	0	0	0	0	0	0	0	0	0	0	Bacteroidales	o__Bacteroidales(UID2657)
3321JW_0918_034_H3	1	0	1	1	1	1	1	1	2	1	0	0	0	0	0	0	0	1	1	0	Bacteroidales	o__Bacteroidales(UID2621)
3321JW_0918_034_H4	1	0	1	1	1	1	1	1	2	1	0	0	0	0	0	0	0	0	0	0	Bacteroidales	o__Bacteroidales(UID2657)
3321JW_0918_034_H6	1	0	1	1	1	1	1	1	1	1	0	0	0	2	0	0	0	5	0	0	Enterobacterales	f__Enterobacteriaceae(UID5121)
3321JW_0918_034_H7	1	0	1	1	1	1	1	1	1	1	0	0	0	2	0	0	0	5	0	0	Enterobacterales	f__Enterobacteriaceae(UID5121)
3321JW_0918_045_A10	2	0	1	2	1	1	1	1	2	1	0	0	0	0	0	0	0	0	1	0	Bacteroidales	o__Bacteroidales(UID2621)
3321JW_0918_045_A11	1	0	1	1	1	1	1	1	2	1	0	0	0	0	0	0	0	1	1	0	Bacteroidales	o__Bacteroidales(UID2621)
3321JW_0918_045_A12	1	0	1	1	1	1	1	1	2	1	0	0	0	0	0	0	0	0	0	0	Bacteroidales	o__Bacteroidales(UID2657)
3321JW_0918_045_A1	1	0	1	1	1	1	1	1	2	0	1	0	0	0	0	0	0	1	3	0	Bacteroidales	o__Bacteroidales(UID2657)
3321JW_0918_045_A2	1	0	1	1	1	1	1	1	2	1	0	0	0	0	0	0	0	0	0	0	Bacteroidales	o__Bacteroidales(UID2657)
3321JW_0918_045_A3	1	0	1	1	1	1	1	1	2	0	1	0	0	0	0	0	0	1	3	0	Bacteroidales	o__Bacteroidales(UID2657)
3321JW_0918_045_A4	1	0	1	1	1	1	1	1	2	0	1	0	0	0	0	0	0	1	3	0	Bacteroidales	o__Bacteroidales(UID2657)
3321JW_0918_045_A6	2	0	1	2	1	1	1	1	2	1	0	0	0	0	0	0	0	0	1	0	Bacteroidales	o__Bacteroidales(UID2621)
3321JW_0918_045_A7	1	0	0	1	1	1	1	1	2	1	0	0	0	0	0	0	0	1	1	0	Bacteroidales	o__Bacteroidales(UID2621)
3321JW_0918_045_A8	1	0	1	1	1	1	1	1	2	1	0	0	0	0	0	0	0	0	0	0	Bacteroidales	o__Bacteroidales(UID2657)
3321JW_0918_045_A9	1	0	1	1	1	1	1	1	2	1	0	0	0	0	0	0	0	0	0	0	Bacteroidales	o__Bacteroidales(UID2657)
3321JW_0918_045_B10	1	0	1	1	1	1	1	1	2	1	0	0	0	0	0	0	0	0	0	0	Bacteroidales	o__Bacteroidales(UID2657)
3321JW_0918_045_B11	1	0	1	1	1	1	1	1	2	0	1	0	0	0	0	0	0	1	3	0	Bacteroidales	o__Bacteroidales(UID2657)
3321JW_0918_045_B12	1	0	1	1	1	1	1	1	2	0	1	0	0	0	0	0	0	1	3	0	Bacteroidales	o__Bacteroidales(UID2657)
3321JW_0918_045_B1	1	0	1	1	1	1	1	1	2	1	0	0	0	0	0	0	0	0	0	0	Bacteroidales	o__Bacteroidales(UID2657)
3321JW_0918_045_B2	1	0	1	1	1	1	1	1	2	1	0	0	0	0	0	0	0	0	0	0	Bacteroidales	o__Bacteroidales(UID2657)
3321JW_0918_045_B3	1	0	1	1	1	1	1	1	2	1	0	0	0	0	0	0	0	0	0	0	Bacteroidales	o__Bacteroidales(UID2657)
3321JW_0918_045_B4	1	0	0	1	1	1	1	1	2	1	0	0	0	0	0	0	0	1	1	0	Bacteroidales	o__Bacteroidales(UID2621)
3321JW_0918_045_B5	1	0	1	1	1	1	1	1	2	0	1	0	0	0	0	0	0	1	3	0	Bacteroidales	o__Bacteroidales(UID2657)
3321JW_0918_045_B6	1	0	1	1	1	1	1	1	2	1	0	0	0	0	0	0	0	0	0	0	Bacteroidales	o__Bacteroidales(UID2657)
3321JW_0918_045_B7	1	0	1	1	1	1	1	1	2	1	0	0	0	0	0	0	0	0	0	0	Bacteroidales	o__Bacteroidales(UID2657)
3321JW_0918_045_B8	1	0	1	1	1	1	1	1	2	1	0	0	0	0	0	0	0	0	0	0	Bacteroidales	o__Bacteroidales(UID2657)
3321JW_0918_045_B9	1	0	0	1	1	1	1	1	2	1	0	0	0	0	0	0	0	1	1	0	Bacteroidales	o__Bacteroidales(UID2621)
3321JW_0918_045_C10	0	0	1	1	1	1	1	1	2	1	0	0	0	0	0	0	0	1	1	0	Bacteroidales	o__Bacteroidales(UID2621)
3321JW_0918_045_C11	1	0	1	1	1	1	1	1	2	1	0	0	0	0	0	0	0	0	0	0	Bacteroidales	o__Bacteroidales(UID2657)
3321JW_0918_045_C12	1	0	1	1	1	1	1	1	2	1	0	0	0	0	0	0	0	0	0	0	Bacteroidales	o__Bacteroidales(UID2657)
3321JW_0918_045_C1	1	0	1	1	1	1	1	1	2	1	0	0	0	0	0	0	0	0	0	0	Bacteroidales	o__Bacteroidales(UID2657)
3321JW_0918_045_C3	1	0	1	1	1	1	1	1	2	1	0	0	0	0	0	0	0	0	0	0	Bacteroidales	o__Bacteroidales(UID2657)
3321JW_0918_045_C4	1	0	1	1	1	1	1	1	2	0	1	0	0	0	0	0	0	1	3	0	Bacteroidales	o__Bacteroidales(UID2657)
3321JW_0918_045_C5	1	0	1	1	1	1	1	1	2	0	1	0	0	0	0	0	0	1	3	0	Bacteroidales	o__Bacteroidales(UID2657)
3321JW_0918_045_C6	1	0	1	1	1	1	1	1	2	0	1	0	0	0	0	0	0	1	3	0	Bacteroidales	o__Bacteroidales(UID2657)
3321JW_0918_045_C7	1	0	1	1	1	1	1	1	2	1	0	0	0	0	0	0	0	1	1	0	Bacteroidales	o__Bacteroidales(UID2621)
3321JW_0918_045_C8	1	0	0	1	1	1	1	1	2	1	0	0	0	0	0	0	0	1	1	0	Bacteroidales	o__Bacteroidales(UID2621)
3321JW_0918_045_C9	1	0	1	1	1	1	1	1	2	0	1	0	0	0	0	0	0	1	1	0	Bacteroidales	o__Bacteroidales(UID2654)
3321JW_0918_045_D10	1	0	0	1	1	1	1	1	2	0	1	0	0	0	0	0	0	2	1	0	Bacteroidales	g__Bacteroides(UID2691)
3321JW_0918_045_D11	1	0	1	1	1	1	1	1	2	1	0	0	0	0	0	0	0	0	0	0	Bacteroidales	o__Bacteroidales(UID2657)
3321JW_0918_045_D12	0	0	1	1	1	1	1	1	2	1	0	0	0	0	0	0	0	0	0	0	Bacteroidales	o__Bacteroidales(UID2657)
3321JW_0918_045_D1	1	0	1	1	1	1	1	1	2	1	0	0	0	0	0	0	0	1	1	0	Bacteroidales	o__Bacteroidales(UID2621)
3321JW_0918_045_D2	1	0	1	1	1	1	1	1	2	0	1	0	0	0	0	0	0	1	3	0	Bacteroidales	o__Bacteroidales(UID2657)
3321JW_0918_045_D3	1	0	1	1	1	1	1	1	2	0	1	0	0	0	0	0	0	1	3	0	Bacteroidales	o__Bacteroidales(UID2657)
3321JW_0918_045_D4	1	0	0	1	1	1	1	1	2	0	1	0	0	0	0	0	0	2	1	0	Bacteroidales	g__Bacteroides(UID2691)
3321JW_0918_045_D5	1	0	0	1	1	1	1	1	2	0	1	0	0	0	0	0	0	2	1	0	Bacteroidales	g__Bacteroides(UID2691)
3321JW_0918_045_D6	1	0	0	1	1	1	1	1	2	1	0	0	0	0	0	0	0	1	1	0	Bacteroidales	o__Bacteroidales(UID2621)
3321JW_0918_045_D7	1	0	1	1	1	1	1	1	2	0	1	0	0	0	0	0	0	1	3	0	Bacteroidales	o__Bacteroidales(UID2657)
3321JW_0918_045_D8	1	0	1	1	1	1	1	1	2	0	1	0	0	0	0	0	0	1	3	0	Bacteroidales	o__Bacteroidales(UID2657)
3321JW_0918_045_D9	1	0	0	1	1	1	1	1	2	1	0	0	0	0	0	0	0	1	1	0	Bacteroidales	o__Bacteroidales(UID2621)
3321JW_0918_045_E10	1	0	1	1	1	1	1	1	2	1	0	0	0	0	0	0	0	0	0	0	Bacteroidales	o__Bacteroidales(UID2657)
3321JW_0918_045_E11	1	0	1	1	1	1	1	1	2	1	0	0	0	0	0	0	0	1	1	0	Bacteroidales	o__Bacteroidales(UID2621)
3321JW_0918_045_E12	1	0	1	1	1	1	1	1	2	1	0	0	0	0	0	0	0	0	0	0	Bacteroidales	o__Bacteroidales(UID2657)
3321JW_0918_045_E1	1	0	1	1	1	1	1	1	2	0	1	0	0	0	0	0	0	1	3	0	Bacteroidales	o__Bacteroidales(UID2657)
3321JW_0918_045_E2	1	0	1	1	1	1	1	1	2	1	0	0	0	0	0	0	0	0	0	0	Bacteroidales	o__Bacteroidales(UID2657)
3321JW_0918_045_E3	1	0	1	1	1	1	1	1	2	1	0	0	0	0	0	0	0	0	0	0	Bacteroidales	o__Bacteroidales(UID2657)
3321JW_0918_045_E4	1	0	1	1	1	1	1	1	2	0	1	0	0	0	0	0	0	1	3	0	Bacteroidales	o__Bacteroidales(UID2657)
3321JW_0918_045_E5	1	0	1	1	0	1	1	1	2	0	1	0	0	0	0	0	0	1	3	0	Bacteroidales	o__Bacteroidales(UID2657)
3321JW_0918_045_E6	1	0	1	1	1	1	1	1	2	1	0	0	0	0	0	0	0	1	1	0	Bacteroidales	o__Bacteroidales(UID2621)
3321JW_0918_045_E7	1	0	0	1	1	1	1	1	2	0	1	0	0	0	0	0	0	2	1	0	Bacteroidales	g__Bacteroides(UID2691)
3321JW_0918_045_E8	1	0	0	1	1	1	1	1	2	0	1	0	0	0	0	0	0	2	1	0	Bacteroidales	g__Bacteroides(UID2691)
3321JW_0918_045_E9	1	0	0	1	1	1	1	1	2	0	1	0	0	0	0	0	0	2	1	0	Bacteroidales	g__Bacteroides(UID2691)
3321JW_0918_045_F10	1	0	1	1	1	1	1	1	2	1	0	0	0	0	0	0	0	0	0	0	Bacteroidales	o__Bacteroidales(UID2657)
3321JW_0918_045_F11	1	0	1	1	1	1	1	1	2	1	0	0	0	0	0	0	0	1	1	0	Bacteroidales	o__Bacteroidales(UID2621)
3321JW_0918_045_F12	1	0	1	1	1	1	1	1	2	1	0	0	0	0	0	0	0	0	0	0	Bacteroidales	o__Bacteroidales(UID2657)
3321JW_0918_045_F1	1	0	1	1	1	1	1	1	2	1	0	0	0	0	0	0	0	0	0	0	Bacteroidales	o__Bacteroidales(UID2657)
3321JW_0918_045_F2	1	0	1	1	1	1	1	1	2	1	0	0	0	0	0	0	0	0	0	0	Bacteroidales	o__Bacteroidales(UID2657)
3321JW_0918_045_F3	1	0	1	1	1	1	1	1	2	0	1	0	0	0	0	0	0	1	3	0	Bacteroidales	o__Bacteroidales(UID2657)
3321JW_0918_045_F4	2	0	1	2	1	1	1	1	2	1	0	0	0	0	0	0	0	0	1	0	Bacteroidales	o__Bacteroidales(UID2621)
3321JW_0918_045_F5	1	0	1	1	1	1	1	1	2	1	0	0	0	0	0	0	0	0	0	0	Bacteroidales	o__Bacteroidales(UID2657)
3321JW_0918_045_F6	1	0	1	1	1	1	1	1	2	1	0	0	0	0	0	0	0	0	0	0	Bacteroidales	o__Bacteroidales(UID2657)
3321JW_0918_045_F7	2	0	1	2	1	1	1	1	2	1	0	0	0	0	0	0	0	0	1	0	Bacteroidales	o__Bacteroidales(UID2621)
3321JW_0918_045_F8	1	0	1	1	1	1	1	1	2	1	0	0	0	0	0	0	0	0	0	0	Bacteroidales	o__Bacteroidales(UID2657)
3321JW_0918_045_F9	1	0	0	1	1	1	1	1	2	1	0	0	0	0	0	0	0	1	1	0	Bacteroidales	o__Bacteroidales(UID2621)
3321JW_0918_045_G10	1	0	1	1	1	1	1	1	2	0	1	0	0	0	0	0	0	1	3	0	Bacteroidales	o__Bacteroidales(UID2657)
3321JW_0918_045_G11	2	0	1	2	1	1	1	1	2	1	0	0	0	0	0	0	0	0	1	0	Bacteroidales	o__Bacteroidales(UID2621)
3321JW_0918_045_G12	1	0	1	1	1	1	1	1	2	1	0	0	0	0	0	0	0	0	0	0	Bacteroidales	o__Bacteroidales(UID2657)
3321JW_0918_045_G1	1	0	1	1	1	1	1	1	2	1	0	0	0	0	0	0	0	0	0	0	Bacteroidales	o__Bacteroidales(UID2657)
3321JW_0918_045_G3	1	0	1	1	1	1	1	1	2	0	1	0	0	0	0	0	0	1	3	0	Bacteroidales	o__Bacteroidales(UID2657)
3321JW_0918_045_G4	1	0	1	1	1	1	1	1	2	1	0	0	0	0	0	0	0	1	1	0	Bacteroidales	o__Bacteroidales(UID2621)
3321JW_0918_045_G5	1	0	1	1	1	1	1	1	2	0	1	0	0	0	0	0	0	1	3	0	Bacteroidales	o__Bacteroidales(UID2657)
3321JW_0918_045_G7	1	0	1	1	1	1	1	1	2	1	0	0	0	0	0	0	0	1	1	0	Bacteroidales	o__Bacteroidales(UID2621)
3321JW_0918_045_G8	2	0	1	2	1	1	1	1	2	1	0	0	0	0	0	0	0	0	1	0	Bacteroidales	o__Bacteroidales(UID2621)
3321JW_0918_045_G9	1	0	1	1	1	1	1	1	2	1	0	0	0	0	0	0	0	0	0	0	Bacteroidales	o__Bacteroidales(UID2657)
3321JW_0918_045_H10	1	0	1	1	1	1	1	1	2	1	0	0	0	0	0	0	0	1	1	0	Bacteroidales	o__Bacteroidales(UID2621)
3321JW_0918_045_H11	1	0	1	1	1	1	1	1	2	1	0	0	0	0	0	0	0	0	0	0	Bacteroidales	o__Bacteroidales(UID2657)
3321JW_0918_045_H12	1	0	1	1	1	1	1	1	2	0	1	0	0	0	0	0	0	1	1	0	Bacteroidales	o__Bacteroidales(UID2654)
3321JW_0918_045_H1	1	0	1	1	1	1	1	1	2	1	0	0	0	0	0	0	0	0	0	0	Bacteroidales	o__Bacteroidales(UID2657)
3321JW_0918_045_H2	1	0	1	1	1	1	1	1	2	1	0	0	0	0	0	0	0	0	0	0	Bacteroidales	o__Bacteroidales(UID2657)
3321JW_0918_045_H3	1	0	1	1	1	1	1	1	2	1	0	0	0	0	0	0	0	0	0	0	Bacteroidales	o__Bacteroidales(UID2657)
3321JW_0918_045_H4	1	0	1	1	1	1	1	1	2	1	0	0	0	0	0	0	0	1	1	0	Bacteroidales	o__Bacteroidales(UID2621)
3321JW_0918_045_H5	1	0	1	1	1	1	1	1	2	0	1	0	0	0	0	0	0	1	3	0	Bacteroidales	o__Bacteroidales(UID2657)
3321JW_0918_045_H6	1	0	0	1	1	1	1	1	2	1	0	0	0	0	0	0	0	1	1	0	Bacteroidales	o__Bacteroidales(UID2621)
3321JW_0918_045_H7	1	0	1	1	1	1	1	1	2	1	0	0	0	0	0	0	0	0	0	0	Bacteroidales	o__Bacteroidales(UID2657)
3321JW_0918_045_H8	1	0	1	1	1	1	1	1	2	0	1	0	0	0	0	0	0	1	3	0	Bacteroidales	o__Bacteroidales(UID2657)
3321JW_0918_045_H9	1	0	1	1	1	1	1	1	2	1	0	0	0	0	0	0	0	1	1	0	Bacteroidales	o__Bacteroidales(UID2621)
3401SE_0218_027_A10	1	0	0	0	0	0	0	1	1	0	1	0	0	1	0	0	0	1	0	0	Coriobacteriales	Collinsella_sp.10
3401SE_0218_027_A11	0	0	0	0	1	1	1	1	1	1	0	0	0	0	0	0	0	0	0	0	Clostridiales	Clostridium_ventriculi
3401SE_0218_027_A12	1	0	0	0	0	0	0	1	1	1	0	0	1	0	1	1	0	0	0	0	Unknown	Unknown_genus_48
3401SE_0218_027_A1	1	0	0	0	0	0	0	1	2	0	1	0	0	1	0	0	0	1	0	0	Coriobacteriales	Collinsella_sp.10
3401SE_0218_027_A2	1	0	0	1	1	1	1	1	2	0	1	0	0	0	0	0	0	2	1	0	Bacteroidales	Bacteroides_intestinalis
3401SE_0218_027_A3	1	0	0	0	0	0	0	1	1	0	1	0	0	1	0	0	0	1	0	0	Coriobacteriales	Collinsella_sp.10
3401SE_0218_027_A4	1	0	1	1	1	1	1	1	2	1	0	0	0	0	0	0	0	0	0	0	Unknown	Unknown_genus_42
3401SE_0218_027_A5	1	0	0	1	1	1	1	1	2	0	1	0	0	0	0	0	0	2	1	0	Bacteroidales	Bacteroides_intestinalis
3401SE_0218_027_A6	1	0	0	0	1	1	1	1	1	1	0	0	0	0	0	0	0	0	0	0	Clostridiales	Clostridium_ventriculi
3401SE_0218_027_A7	1	0	0	0	1	1	1	1	2	0	1	0	0	0	0	0	0	1	0	0	Bacteroidales	Prevotella_sp.2
3401SE_0218_027_A8	1	0	0	0	0	0	0	1	1	0	1	0	0	1	0	0	0	1	0	0	Coriobacteriales	Collinsella_sp.10
3401SE_0218_027_A9	1	0	0	0	0	0	0	1	1	0	1	0	0	1	0	0	0	1	0	0	Coriobacteriales	Collinsella_sp.10
3401SE_0218_027_B10	1	0	1	1	1	1	1	1	2	1	0	0	0	0	0	0	0	0	0	0	Unknown	Unknown_genus_42
3401SE_0218_027_B11	1	0	0	0	1	1	1	1	1	1	0	0	0	0	0	0	0	0	0	0	Clostridiales	Clostridium_ventriculi
3401SE_0218_027_B12	1	0	0	0	1	1	1	1	1	1	0	0	0	0	0	0	0	0	0	0	Clostridiales	Clostridium_ventriculi
3401SE_0218_027_B1	1	0	0	1	1	1	1	1	2	0	1	0	0	0	0	0	0	0	0	0	Bacteroidales	Prevotella_sp.
3401SE_0218_027_B2	1	0	1	1	1	1	1	1	2	0	1	0	0	0	0	0	0	1	1	0	Bacteroidales	Bacteroides_vulgatus
3401SE_0218_027_B3	1	0	0	0	0	0	0	1	1	0	1	0	0	0	0	1	0	0	0	0	Coriobacteriales	Collinsella_sp.7
3401SE_0218_027_B4	1	0	0	1	1	1	1	1	2	0	1	0	0	0	0	0	0	1	0	0	Unknown	Unknown_genus_54
3401SE_0218_027_B5	1	0	0	0	0	0	0	1	1	0	1	0	0	1	0	0	0	1	0	0	Coriobacteriales	Collinsella_sp.10
3401SE_0218_027_B6	1	0	0	0	0	0	0	1	1	0	1	0	0	1	0	0	0	1	0	0	Unknown	Unknown_genus_39
3401SE_0218_027_B7	1	0	1	1	1	1	1	1	2	0	1	0	0	0	0	0	0	1	1	0	Bacteroidales	Bacteroides_vulgatus
3401SE_0218_027_B8	1	0	0	1	1	1	1	1	2	0	1	0	0	0	0	0	0	2	1	0	Bacteroidales	Bacteroides_intestinalis
3401SE_0218_027_B9	1	0	1	1	1	1	1	1	2	0	1	0	0	0	0	0	0	1	1	0	Bacteroidales	Bacteroides_vulgatus
3401SE_0218_027_C10	1	0	1	1	1	1	1	1	2	1	0	0	0	0	0	0	0	0	0	0	Unknown	Unknown_genus_42
3401SE_0218_027_C11	1	0	0	0	0	0	0	1	1	1	0	0	1	0	1	1	0	0	0	0	Unknown	Unknown_genus_48
3401SE_0218_027_C12	0	0	0	0	0	0	0	1	1	1	0	0	1	0	1	1	0	0	0	0	Unknown	Unknown_genus_48
3401SE_0218_027_C1	0	0	0	0	0	0	0	1	1	0	1	0	0	1	0	0	0	1	0	0	Unknown	Unknown_genus_24
3401SE_0218_027_C2	0	0	0	0	0	0	0	1	1	0	1	0	0	0	0	1	0	0	0	0	Unknown	Unknown_genus_43
3401SE_0218_027_C3	1	0	0	0	1	1	1	1	1	1	0	0	0	0	0	0	0	0	0	0	Clostridiales	Clostridium_ventriculi
3401SE_0218_027_C4	1	0	1	1	1	1	1	1	2	0	1	0	0	0	0	0	0	1	1	0	Bacteroidales	Bacteroides_vulgatus
3401SE_0218_027_C6	1	0	0	0	0	0	0	1	1	0	1	0	0	1	0	0	0	1	0	0	Coriobacteriales	Collinsella_sp.11
3401SE_0218_027_C7	1	0	1	1	1	1	1	1	2	0	1	0	0	0	0	0	0	1	1	0	Bacteroidales	Bacteroides_vulgatus
3401SE_0218_027_C8	1	0	0	0	0	0	0	1	1	0	1	0	0	1	0	0	0	1	0	0	Coriobacteriales	Collinsella_sp.10
3401SE_0218_027_C9	1	0	0	0	0	0	0	1	1	0	1	0	0	1	0	0	0	1	0	0	Coriobacteriales	Collinsella_sp.10
3401SE_0218_027_D10	1	0	0	0	0	0	0	1	1	0	1	0	0	1	0	0	0	1	0	0	Coriobacteriales	Collinsella_sp.10
3401SE_0218_027_D11	1	0	0	0	0	0	0	1	1	1	0	0	1	0	1	1	0	0	0	0	Unknown	Unknown_genus_48
3401SE_0218_027_D12	1	0	0	0	1	1	1	1	1	1	0	0	0	0	0	0	0	0	0	0	Clostridiales	Clostridium_ventriculi
3401SE_0218_027_D1	1	0	1	1	1	1	1	1	2	1	0	0	0	0	0	0	0	0	0	0	Unknown	Unknown_genus_42
3401SE_0218_027_D2	1	0	0	0	1	1	1	1	2	0	1	0	0	0	0	0	0	1	0	0	Bacteroidales	Prevotella_copri
3401SE_0218_027_D3	1	0	1	1	1	1	1	1	2	0	1	0	0	0	0	0	0	1	2	0	Bacteroidales	Bacteroides_uniformis
3401SE_0218_027_D5	0	0	0	0	0	0	0	1	1	0	1	0	0	0	0	1	0	0	0	0	Unknown	Unknown_genus_43
3401SE_0218_027_D6	1	0	0	1	0	0	0	1	2	1	0	0	0	0	0	0	0	1	1	0	Bacteroidales	Alistipes_senegalensis
3401SE_0218_027_D7	1	0	1	1	1	1	1	1	2	1	0	0	0	0	0	0	0	0	0	0	Unknown	Unknown_genus_42
3401SE_0218_027_D8	1	0	0	0	1	1	1	1	2	0	1	0	0	0	0	0	0	1	0	0	Bacteroidales	Prevotella_copri
3401SE_0218_027_D9	1	0	1	1	1	1	1	1	2	0	1	0	0	0	0	0	0	1	1	0	Bacteroidales	Bacteroides_vulgatus
3401SE_0218_027_E10	1	0	1	1	1	1	1	1	2	0	1	0	0	0	0	0	0	1	1	0	Bacteroidales	Bacteroides_vulgatus
3401SE_0218_027_E11	1	0	0	0	1	1	1	1	1	1	0	0	0	0	0	0	0	0	0	0	Clostridiales	Clostridium_ventriculi
3401SE_0218_027_E12	1	0	0	0	1	1	1	1	1	1	0	0	0	0	0	0	0	0	0	0	Clostridiales	Clostridium_ventriculi
3401SE_0218_027_E1	1	0	0	1	1	1	1	1	2	0	1	0	0	0	0	0	0	2	1	0	Bacteroidales	Bacteroides_intestinalis
3401SE_0218_027_E2	1	0	0	1	1	1	1	1	2	0	1	0	0	0	0	0	0	2	1	0	Bacteroidales	Bacteroides_intestinalis
3401SE_0218_027_E3	1	0	1	1	1	1	1	1	2	1	0	0	0	0	0	0	0	0	0	0	Unknown	Unknown_genus_42
3401SE_0218_027_E4	1	0	0	0	0	0	0	1	1	0	1	0	0	1	0	0	0	1	0	0	Coriobacteriales	Collinsella_sp.10
3401SE_0218_027_E5	1	0	1	1	1	1	1	1	2	0	1	0	0	0	0	0	0	1	2	0	Bacteroidales	Bacteroides_uniformis
3401SE_0218_027_E6	1	0	1	1	1	1	1	1	2	1	0	0	0	0	0	0	0	0	0	0	Unknown	Unknown_genus_42
3401SE_0218_027_E7	1	0	0	0	0	0	0	1	1	0	1	0	0	1	0	0	0	1	0	0	Coriobacteriales	Collinsella_sp.10
3401SE_0218_027_E8	1	0	1	1	1	1	1	1	2	0	1	0	0	0	0	0	0	1	1	0	Bacteroidales	Bacteroides_vulgatus
3401SE_0218_027_E9	1	0	0	0	0	0	0	1	1	0	1	0	0	1	0	0	0	1	0	0	Coriobacteriales	Collinsella_sp.10
3401SE_0218_027_F10	1	0	0	0	0	0	0	1	1	0	1	0	0	1	0	0	0	1	0	0	Coriobacteriales	Collinsella_sp.10
3401SE_0218_027_F11	1	0	0	0	1	1	1	1	1	1	0	0	0	0	0	0	0	0	0	0	Clostridiales	Clostridium_ventriculi
3401SE_0218_027_F1	1	0	0	1	1	1	1	1	2	0	1	0	0	0	0	0	0	4	1	0	Bacteroidales	Bacteroides_ovatus
3401SE_0218_027_F2	1	0	0	1	1	1	1	1	2	0	1	0	0	0	0	0	0	1	0	0	Unknown	Unknown_genus_49
3401SE_0218_027_F3	1	0	0	0	0	0	0	1	1	0	1	0	0	1	0	0	0	1	0	0	Coriobacteriales	Collinsella_sp.11
3401SE_0218_027_F4	1	0	1	1	1	1	1	1	2	0	1	0	0	0	0	0	0	1	1	0	Bacteroidales	Bacteroides_vulgatus
3401SE_0218_027_F5	1	0	1	1	1	1	1	1	2	0	1	0	0	0	0	0	0	1	1	0	Bacteroidales	Bacteroides_vulgatus
3401SE_0218_027_F6	1	0	0	0	0	0	0	1	1	0	1	0	0	1	0	0	0	1	0	0	Coriobacteriales	Collinsella_sp.10
3401SE_0218_027_F7	0	0	0	0	0	0	0	1	1	0	1	0	0	1	0	0	0	1	0	0	Coriobacteriales	Collinsella_sp.10
3401SE_0218_027_F8	1	0	1	1	1	1	1	1	2	1	0	0	0	0	0	0	0	0	0	0	Unknown	Unknown_genus_42
3401SE_0218_027_F9	1	0	0	0	0	0	0	1	1	0	1	0	0	0	0	1	0	0	0	1	Clostridiales	Coprococcus_comes
3401SE_0218_027_G10	0	0	0	0	1	0	1	1	2	0	1	0	0	0	0	0	0	1	0	0	Bacteroidales	Odoribacter_splanchnicus
3401SE_0218_027_G11	1	0	0	0	0	0	0	1	1	1	0	0	1	1	1	1	1	0	0	1	Unknown	Unknown_genus_7
3401SE_0218_027_G12	2	0	0	0	1	1	1	1	1	1	0	1	1	1	0	0	0	0	0	1	Erysipelotrichales	Turicibacter_sanguinis
3401SE_0218_027_G1	1	0	0	0	1	1	1	1	1	1	0	0	0	0	0	0	0	0	0	0	Clostridiales	Clostridium_ventriculi
3401SE_0218_027_G2	0	0	0	0	0	0	0	1	1	0	1	0	0	0	0	1	0	0	0	0	Unknown	Unknown_genus_43
3401SE_0218_027_G3	1	0	0	1	1	1	1	1	2	0	1	0	0	0	0	0	0	4	1	0	Bacteroidales	Bacteroides_ovatus
3401SE_0218_027_G4	1	0	0	0	0	0	0	1	1	0	1	0	0	1	0	0	0	1	0	0	Coriobacteriales	Collinsella_sp.10
3401SE_0218_027_G5	1	0	0	0	0	0	0	1	1	0	1	0	0	1	0	0	0	1	0	0	Coriobacteriales	Collinsella_sp.10
3401SE_0218_027_G6	1	0	1	1	1	1	1	1	2	0	1	0	0	0	0	0	0	1	1	0	Bacteroidales	Bacteroides_vulgatus
3401SE_0218_027_G7	1	0	0	0	0	0	0	1	1	0	1	0	0	1	0	0	0	1	0	0	Coriobacteriales	Collinsella_sp.11
3401SE_0218_027_G8	1	0	1	1	1	1	1	1	2	1	0	0	0	0	0	0	0	0	0	0	Unknown	Unknown_genus_42
3401SE_0218_027_G9	1	0	0	0	0	0	0	1	1	0	1	0	0	1	0	0	0	1	0	0	Coriobacteriales	Collinsella_sp.11
3401SE_0218_027_H10	1	0	1	1	1	1	1	1	2	1	0	0	0	0	0	0	0	0	0	0	Unknown	Unknown_genus_42
3401SE_0218_027_H11	1	0	0	0	1	1	1	1	1	0	1	0	0	0	0	1	0	0	0	1	Clostridiales	Ruminococcus_faecis
3401SE_0218_027_H12	1	0	0	0	1	1	1	1	1	0	1	0	0	0	0	1	0	0	0	1	Clostridiales	Ruminococcus_faecis
3401SE_0218_027_H2	1	0	1	1	0	1	1	1	2	0	1	0	0	0	0	0	0	1	2	0	Bacteroidales	Bacteroides_uniformis
3401SE_0218_027_H3	1	0	1	1	1	1	1	1	2	0	1	0	0	0	0	0	0	1	1	0	Bacteroidales	Bacteroides_vulgatus
3401SE_0218_027_H4	1	0	0	0	1	0	1	1	2	1	0	0	0	0	0	0	0	0	0	0	Bacteroidales	Butyricimonas_virosa
3401SE_0218_027_H5	1	0	0	1	1	1	1	1	2	0	1	0	0	0	0	0	0	2	1	0	Bacteroidales	Bacteroides_intestinalis
3401SE_0218_027_H6	1	0	0	0	1	0	1	1	2	1	0	0	0	0	0	0	0	0	0	0	Bacteroidales	Butyricimonas_virosa
3401SE_0218_027_H7	1	0	0	0	0	0	0	1	1	0	1	0	0	1	0	0	0	1	0	0	Coriobacteriales	Collinsella_sp.10
3401SE_0218_027_H8	1	0	0	0	0	0	0	1	1	0	1	0	0	1	0	0	0	0	0	0	Coriobacteriales	Collinsella_sp.10
3401SE_0218_027_H9	1	0	0	0	0	0	0	1	1	0	1	0	0	1	0	0	0	1	0	0	Coriobacteriales	Collinsella_sp.10
3554DX_1118_066_A10	0	0	0	0	1	1	1	1	2	0	1	0	0	0	0	0	0	1	0	0	Bacteroidales	g__Prevotella(UID2724)
3554DX_1118_066_A11	1	0	0	0	1	1	1	1	2	0	1	0	0	0	0	0	0	1	0	0	Bacteroidales	g__Prevotella(UID2724)
3554DX_1118_066_A1	1	0	0	0	1	1	1	1	2	0	1	0	0	0	0	0	0	1	0	0	Bacteroidales	g__Prevotella(UID2724)
3554DX_1118_066_A2	1	0	0	1	1	1	1	1	2	0	1	0	0	0	0	0	0	1	0	0	Bacteroidales	g__Prevotella(UID2724)
3554DX_1118_066_A3	1	0	0	0	1	1	1	1	2	0	1	0	0	0	0	0	0	1	0	0	Bacteroidales	g__Prevotella(UID2724)
3554DX_1118_066_A4	1	0	0	0	1	1	1	1	2	0	1	0	0	0	0	0	0	1	0	0	Bacteroidales	g__Prevotella(UID2724)
3554DX_1118_066_A5	1	0	0	0	1	1	1	1	2	0	1	0	0	0	0	0	0	1	0	0	Bacteroidales	g__Prevotella(UID2724)
3554DX_1118_066_A6	1	0	0	1	1	1	1	1	2	1	0	0	0	0	0	0	0	0	1	0	Bacteroidales	o__Bacteroidales(UID2621)
3554DX_1118_066_A7	1	0	0	0	1	1	1	1	2	0	1	0	0	0	0	0	0	1	0	0	Bacteroidales	g__Prevotella(UID2724)
3554DX_1118_066_A8	1	0	0	1	1	1	1	1	2	1	0	0	0	0	0	0	0	0	1	0	Bacteroidales	o__Bacteroidales(UID2621)
3554DX_1118_066_A9	1	0	0	0	1	1	1	1	2	0	1	0	0	0	0	0	0	1	0	0	Bacteroidales	g__Prevotella(UID2724)
3554DX_1118_066_B10	1	0	0	0	1	1	1	1	2	0	1	0	0	0	0	0	0	1	0	0	Bacteroidales	g__Prevotella(UID2724)
3554DX_1118_066_B11	1	0	0	0	1	1	1	1	2	0	1	0	0	0	0	0	0	1	0	0	Bacteroidales	g__Prevotella(UID2724)
3554DX_1118_066_B1	1	0	0	0	1	1	1	1	2	0	1	0	0	0	0	0	0	1	0	0	Bacteroidales	g__Prevotella(UID2724)
3554DX_1118_066_B2	1	0	0	1	1	1	1	1	2	1	0	0	0	0	0	0	0	0	1	0	Bacteroidales	o__Bacteroidales(UID2621)
3554DX_1118_066_B3	1	0	0	0	1	1	1	1	2	0	1	0	0	0	0	0	0	1	0	0	Bacteroidales	g__Prevotella(UID2724)
3554DX_1118_066_B4	1	0	0	0	1	1	1	1	2	0	1	0	0	0	0	0	0	1	0	0	Bacteroidales	g__Prevotella(UID2724)
3554DX_1118_066_B6	1	0	0	0	1	1	1	1	2	0	1	0	0	0	0	0	0	1	0	0	Bacteroidales	g__Prevotella(UID2724)
3554DX_1118_066_B7	1	0	0	0	1	1	1	1	2	0	1	0	0	0	0	0	0	0	0	0	Bacteroidales	g__Prevotella(UID2724)
3554DX_1118_066_B9	1	0	0	0	1	1	1	1	2	0	1	0	0	0	0	0	0	1	0	0	Bacteroidales	g__Prevotella(UID2724)
3554DX_1118_066_C10	1	0	0	0	1	1	1	1	2	0	1	0	0	0	0	0	0	1	0	0	Bacteroidales	g__Prevotella(UID2724)
3554DX_1118_066_C11	1	0	0	0	1	1	1	1	2	0	1	0	0	0	0	0	0	1	0	0	Bacteroidales	g__Prevotella(UID2724)
3554DX_1118_066_C1	1	0	0	0	1	1	1	1	2	0	1	0	0	0	0	0	0	1	0	0	Bacteroidales	g__Prevotella(UID2724)
3554DX_1118_066_C2	1	0	0	0	1	1	1	1	2	0	1	0	0	0	0	0	0	1	0	0	Bacteroidales	g__Prevotella(UID2724)
3554DX_1118_066_C3	1	0	0	1	1	1	1	1	2	1	0	0	0	0	0	0	0	0	1	0	Bacteroidales	o__Bacteroidales(UID2621)
3554DX_1118_066_C4	1	0	0	0	1	1	1	1	2	0	1	0	0	0	0	0	0	0	0	0	Bacteroidales	g__Prevotella(UID2724)
3554DX_1118_066_C5	1	0	0	0	1	1	1	1	2	0	1	0	0	0	0	0	0	0	0	0	Bacteroidales	g__Prevotella(UID2724)
3554DX_1118_066_C6	1	0	0	0	1	1	1	1	2	0	1	0	0	0	0	0	0	1	0	0	Bacteroidales	g__Prevotella(UID2724)
3554DX_1118_066_C7	1	0	0	0	1	1	1	1	2	0	1	0	0	0	0	0	0	0	0	0	Bacteroidales	g__Prevotella(UID2724)
3554DX_1118_066_C8	1	0	0	1	1	1	1	1	2	1	0	0	0	0	0	0	0	0	1	0	Bacteroidales	o__Bacteroidales(UID2621)
3554DX_1118_066_C9	0	0	0	0	1	1	1	1	2	0	1	0	0	0	0	0	0	1	0	0	Bacteroidales	g__Prevotella(UID2724)
3554DX_1118_066_D10	1	0	0	0	1	1	1	1	2	0	1	0	0	0	0	0	0	1	0	0	Bacteroidales	g__Prevotella(UID2724)
3554DX_1118_066_D11	1	0	0	1	1	1	1	1	2	1	0	0	0	0	0	0	0	0	1	0	Bacteroidales	o__Bacteroidales(UID2621)
3554DX_1118_066_D1	1	0	0	1	1	1	1	1	2	1	0	0	0	0	0	0	0	0	1	0	Bacteroidales	o__Bacteroidales(UID2621)
3554DX_1118_066_D2	1	0	0	0	1	1	1	1	2	0	1	0	0	0	0	0	0	1	0	0	Bacteroidales	g__Prevotella(UID2724)
3554DX_1118_066_D3	1	0	0	1	1	1	1	1	2	1	0	0	0	0	0	0	0	0	1	0	Bacteroidales	o__Bacteroidales(UID2621)
3554DX_1118_066_D4	1	0	0	0	1	1	1	1	2	0	1	0	0	0	0	0	0	1	0	0	Bacteroidales	g__Prevotella(UID2724)
3554DX_1118_066_D5	1	0	0	1	1	1	1	1	2	1	0	0	0	0	0	0	0	0	1	0	Bacteroidales	o__Bacteroidales(UID2621)
3554DX_1118_066_D6	1	0	0	0	1	1	1	1	2	0	1	0	0	0	0	0	0	1	0	0	Bacteroidales	g__Prevotella(UID2724)
3554DX_1118_066_D7	1	0	0	0	1	1	1	1	2	0	1	0	0	0	0	0	0	1	0	0	Bacteroidales	g__Prevotella(UID2724)
3554DX_1118_066_D8	1	0	0	0	1	1	1	1	2	0	1	0	0	0	0	0	0	1	0	0	Bacteroidales	g__Prevotella(UID2724)
3554DX_1118_066_D9	1	0	0	0	1	1	1	1	2	0	1	0	0	0	0	0	0	1	0	0	Bacteroidales	g__Prevotella(UID2724)
3554DX_1118_066_E10	1	0	0	0	1	1	1	1	2	0	1	0	0	0	0	0	0	1	0	0	Bacteroidales	g__Prevotella(UID2724)
3554DX_1118_066_E11	1	0	0	0	1	1	1	1	2	0	1	0	0	0	0	0	0	0	0	0	Bacteroidales	g__Prevotella(UID2724)
3554DX_1118_066_E1	1	0	0	1	1	1	1	1	2	1	0	0	0	0	0	0	0	0	1	0	Bacteroidales	o__Bacteroidales(UID2621)
3554DX_1118_066_E2	1	0	0	0	1	1	1	1	2	0	1	0	0	0	0	0	0	1	0	0	Bacteroidales	g__Prevotella(UID2724)
3554DX_1118_066_E4	1	0	0	0	1	1	1	1	2	0	1	0	0	0	0	0	0	1	0	0	Bacteroidales	g__Prevotella(UID2724)
3554DX_1118_066_E5	1	0	0	1	1	1	1	1	2	1	0	0	0	0	0	0	0	0	0	0	Bacteroidales	g__Prevotella(UID2724)
3554DX_1118_066_E6	1	0	0	1	1	1	1	1	2	1	0	0	0	0	0	0	0	0	1	0	Bacteroidales	o__Bacteroidales(UID2621)
3554DX_1118_066_E7	1	0	0	0	1	1	1	1	2	0	1	0	0	0	0	0	0	1	0	0	Bacteroidales	g__Prevotella(UID2724)
3554DX_1118_066_E8	1	0	0	0	1	1	1	1	2	0	1	0	0	0	0	0	0	1	0	0	Bacteroidales	g__Prevotella(UID2724)
3554DX_1118_066_E9	1	0	0	0	1	1	1	1	2	0	1	0	0	0	0	0	0	1	0	0	Bacteroidales	g__Prevotella(UID2724)
3554DX_1118_066_F10	1	0	0	0	1	1	1	1	2	0	1	0	0	0	0	0	0	1	0	0	Bacteroidales	g__Prevotella(UID2724)
3554DX_1118_066_F11	1	0	0	1	1	1	1	1	2	1	0	0	0	0	0	0	0	0	1	0	Bacteroidales	o__Bacteroidales(UID2621)
3554DX_1118_066_F1	1	0	0	0	1	1	1	1	2	0	1	0	0	0	0	0	0	1	0	0	Bacteroidales	g__Prevotella(UID2724)
3554DX_1118_066_F2	1	0	0	0	1	1	1	1	2	0	1	0	0	0	0	0	0	1	0	0	Bacteroidales	g__Prevotella(UID2724)
3554DX_1118_066_F3	1	0	0	0	1	1	1	1	2	0	1	0	0	0	0	0	0	0	0	0	Bacteroidales	g__Prevotella(UID2724)
3554DX_1118_066_F4	1	0	0	0	1	1	1	1	2	0	1	0	0	0	0	0	0	1	0	0	Bacteroidales	g__Prevotella(UID2724)
3554DX_1118_066_F5	1	0	0	1	1	1	1	1	2	1	0	0	0	0	0	0	0	0	1	0	Bacteroidales	o__Bacteroidales(UID2621)
3554DX_1118_066_F6	1	0	0	0	1	1	1	1	2	0	1	0	0	0	0	0	0	1	0	0	Bacteroidales	g__Prevotella(UID2724)
3554DX_1118_066_F7	0	0	0	0	1	1	1	1	2	0	1	0	0	0	0	0	0	1	0	0	Bacteroidales	g__Prevotella(UID2724)
3554DX_1118_066_F9	1	0	0	0	1	1	1	1	2	0	1	0	0	0	0	0	0	1	0	0	Bacteroidales	g__Prevotella(UID2724)
3554DX_1118_066_G10	1	0	0	0	1	1	1	1	2	0	1	0	0	0	0	0	0	1	0	0	Bacteroidales	g__Prevotella(UID2724)
3554DX_1118_066_G11	1	0	0	0	1	1	1	1	2	0	1	0	0	0	0	0	0	1	0	0	Bacteroidales	g__Prevotella(UID2724)
3554DX_1118_066_G1	1	0	0	0	1	1	1	1	2	0	1	0	0	0	0	0	0	1	0	0	Bacteroidales	g__Prevotella(UID2724)
3554DX_1118_066_G2	0	0	0	0	1	1	1	1	2	0	1	0	0	0	0	0	0	1	0	0	Bacteroidales	g__Prevotella(UID2724)
3554DX_1118_066_G3	1	0	0	0	1	1	1	1	2	0	1	0	0	0	0	0	0	1	0	0	Bacteroidales	g__Prevotella(UID2724)
3554DX_1118_066_G4	1	0	0	0	1	1	1	1	2	0	1	0	0	0	0	0	0	1	0	0	Bacteroidales	g__Prevotella(UID2724)
3554DX_1118_066_G5	1	0	0	0	1	1	1	1	2	0	1	0	0	0	0	0	0	1	0	0	Bacteroidales	g__Prevotella(UID2724)
3554DX_1118_066_G6	1	0	0	0	1	1	1	1	2	0	1	0	0	0	0	0	0	0	0	0	Bacteroidales	g__Prevotella(UID2724)
3554DX_1118_066_G7	1	0	0	1	1	1	1	1	2	1	0	0	0	0	0	0	0	0	1	0	Bacteroidales	o__Bacteroidales(UID2621)
3554DX_1118_066_G8	1	0	0	1	1	1	1	1	2	1	0	0	0	0	0	0	0	0	1	0	Bacteroidales	o__Bacteroidales(UID2621)
3554DX_1118_066_G9	1	0	0	0	1	1	1	1	2	0	1	0	0	0	0	0	0	1	0	0	Bacteroidales	g__Prevotella(UID2724)
3554DX_1118_066_H10	1	0	0	0	1	1	1	1	2	0	1	0	0	0	0	0	0	1	0	0	Bacteroidales	g__Prevotella(UID2724)
3554DX_1118_066_H11	1	0	0	0	1	1	1	1	2	0	1	0	0	0	0	0	0	1	0	0	Bacteroidales	g__Prevotella(UID2724)
3554DX_1118_066_H1	1	0	0	1	1	1	1	1	2	1	0	0	0	0	0	0	0	0	1	0	Bacteroidales	o__Bacteroidales(UID2621)
3554DX_1118_066_H2	1	0	0	0	1	1	1	1	2	0	1	0	0	0	0	0	0	1	0	0	Bacteroidales	g__Prevotella(UID2724)
3554DX_1118_066_H3	1	0	0	0	1	1	1	1	2	0	1	0	0	0	0	0	0	1	0	0	Bacteroidales	g__Prevotella(UID2724)
3554DX_1118_066_H4	1	0	0	0	1	1	1	1	2	0	1	0	0	0	0	0	0	1	0	0	Bacteroidales	g__Prevotella(UID2724)
3554DX_1118_066_H5	1	0	0	0	1	1	1	1	2	0	1	0	0	0	0	0	0	1	0	0	Bacteroidales	g__Prevotella(UID2724)
3554DX_1118_066_H6	1	0	0	0	1	1	1	1	2	0	1	0	0	0	0	0	0	1	0	0	Bacteroidales	g__Prevotella(UID2724)
3554DX_1118_066_H7	1	0	0	0	1	1	1	1	2	0	1	0	0	0	0	0	0	1	0	0	Bacteroidales	g__Prevotella(UID2724)
3554DX_1118_066_H8	1	0	0	1	1	1	1	1	2	0	1	0	0	0	0	0	0	1	0	0	Bacteroidales	g__Prevotella(UID2724)
3554DX_1118_066_H9	1	0	0	0	1	1	1	1	2	0	1	0	0	0	0	0	0	1	0	0	Bacteroidales	g__Prevotella(UID2724)
3606MB_1118_055_A10	1	0	0	1	1	1	1	1	2	0	1	0	0	0	0	0	0	1	1	0	Bacteroidales	o__Bacteroidales(UID2654)
3606MB_1118_055_A11	1	0	0	0	0	0	0	1	1	0	1	0	0	0	0	1	0	0	0	0	Clostridiales	f__Lachnospiraceae(UID1286)
3606MB_1118_055_A12	1	0	0	0	1	1	1	1	1	0	1	0	0	1	0	1	0	1	0	1	Clostridiales	o__Clostridiales(UID1226)
3606MB_1118_055_A1	0	0	0	0	0	0	0	1	1	0	1	0	0	0	0	1	0	0	0	0	unknown	k__Bacteria(UID2372)
3606MB_1118_055_A2	1	0	0	1	1	1	1	1	2	0	1	0	0	0	0	0	0	1	1	0	Bacteroidales	o__Bacteroidales(UID2654)
3606MB_1118_055_A3	1	0	1	0	1	1	1	1	1	1	0	0	0	0	0	1	0	0	0	0	Lactobacillales	g__Streptococcus(UID684)
3606MB_1118_055_A5	0	0	0	0	0	0	0	1	1	0	1	0	0	0	0	1	0	0	0	1	Clostridiales	o__Clostridiales(UID1226)
3606MB_1118_055_A6	1	0	0	1	1	1	1	1	2	0	1	0	0	0	0	0	0	1	0	0	Bacteroidales	g__Prevotella(UID2724)
3606MB_1118_055_A7	1	0	1	1	1	1	1	1	2	0	1	0	0	0	0	0	0	1	1	0	Bacteroidales	o__Bacteroidales(UID2654)
3606MB_1118_055_A8	0	0	0	0	0	0	0	1	1	0	1	0	0	4	1	1	0	0	0	1	Clostridiales	o__Clostridiales(UID1226)
3606MB_1118_055_A9	1	0	0	1	1	1	1	1	2	0	1	0	0	0	0	0	0	1	1	0	Bacteroidales	o__Bacteroidales(UID2654)
3606MB_1118_055_B10	1	0	0	1	1	1	1	1	2	0	1	0	0	0	0	0	0	2	1	0	Bacteroidales	g__Bacteroides(UID2691)
3606MB_1118_055_B11	1	0	0	1	1	1	1	1	2	0	1	0	0	0	0	0	0	1	1	0	Bacteroidales	o__Bacteroidales(UID2654)
3606MB_1118_055_B12	1	0	0	0	1	1	1	1	1	0	1	0	0	0	0	1	0	0	0	1	Clostridiales	o__Clostridiales(UID1226)
3606MB_1118_055_B1	0	0	1	1	1	1	1	1	1	1	0	0	0	3	1	0	0	2	1	0	Enterobacterales	f__Enterobacteriaceae(UID5124)
3606MB_1118_055_B2	1	0	0	1	1	1	1	1	2	0	1	0	0	0	0	0	0	1	1	0	Bacteroidales	o__Bacteroidales(UID2654)
3606MB_1118_055_B3	0	0	0	0	0	0	0	1	1	0	1	0	0	0	0	1	0	0	0	1	Clostridiales	f__Lachnospiraceae(UID1256)
3606MB_1118_055_B4	1	0	0	1	1	1	1	1	2	0	1	0	0	0	0	0	0	1	1	0	Bacteroidales	o__Bacteroidales(UID2654)
3606MB_1118_055_B5	1	0	0	1	1	1	1	1	2	0	1	0	0	0	0	0	0	1	1	0	Bacteroidales	o__Bacteroidales(UID2654)
3606MB_1118_055_B6	0	0	0	0	0	0	0	1	1	0	1	0	0	0	0	1	0	0	0	0	Clostridiales	f__Lachnospiraceae(UID1286)
3606MB_1118_055_B7	1	0	0	1	1	1	1	1	2	0	1	0	0	0	0	0	0	1	1	0	Bacteroidales	o__Bacteroidales(UID2654)
3606MB_1118_055_B8	0	0	0	0	0	0	0	1	1	0	1	0	0	0	0	1	0	0	0	0	unknown	k__Bacteria(UID2372)
3606MB_1118_055_B9	1	0	0	0	0	0	0	1	1	0	1	0	0	0	0	1	0	0	0	0	Clostridiales	f__Lachnospiraceae(UID1286)
3606MB_1118_055_C10	1	0	1	1	1	1	1	1	2	1	0	0	0	0	0	0	0	1	0	0	Bacteroidales	o__Bacteroidales(UID2657)
3606MB_1118_055_C11	1	0	1	1	1	1	1	1	1	1	0	0	0	3	1	0	0	2	1	0	Enterobacterales	f__Enterobacteriaceae(UID5124)
3606MB_1118_055_C12	1	0	0	1	1	1	1	1	2	0	1	0	0	0	0	0	0	1	1	0	Bacteroidales	o__Bacteroidales(UID2654)
3606MB_1118_055_C1	2	0	0	1	1	1	1	1	1	0	1	0	1	0	0	0	0	0	0	1	Clostridiales	f__Lachnospiraceae(UID1256)
3606MB_1118_055_C2	1	0	0	1	1	1	1	1	2	0	1	0	0	0	0	0	0	1	1	0	Bacteroidales	o__Bacteroidales(UID2654)
3606MB_1118_055_C3	1	0	0	0	0	0	0	1	0	0	0	0	0	2	0	0	0	2	0	1	Bifidobacteriales	f__Bifidobacteriaceae(UID1458)
3606MB_1118_055_C4	0	0	0	0	0	0	0	1	1	0	1	0	0	0	0	1	0	0	0	0	unknown	k__Bacteria(UID2372)
3606MB_1118_055_C5	1	0	0	1	1	1	1	1	2	0	1	0	0	0	0	0	0	1	1	0	Bacteroidales	o__Bacteroidales(UID2654)
3606MB_1118_055_C6	1	0	0	1	1	1	1	1	2	0	1	0	0	0	0	0	0	1	1	0	Bacteroidales	o__Bacteroidales(UID2654)
3606MB_1118_055_C7	0	0	0	0	0	0	0	1	1	0	1	0	0	1	1	1	0	0	0	1	Clostridiales	o__Clostridiales(UID1226)
3606MB_1118_055_C8	1	0	0	0	0	0	0	1	1	0	1	0	0	0	0	1	0	0	0	1	Clostridiales	f__Lachnospiraceae(UID1256)
3606MB_1118_055_C9	1	0	0	1	1	1	1	1	2	1	0	0	0	0	0	0	0	1	1	0	Bacteroidales	o__Bacteroidales(UID2621)
3606MB_1118_055_D10	1	0	0	1	1	1	1	1	2	1	0	0	0	0	0	0	0	1	1	0	Bacteroidales	o__Bacteroidales(UID2621)
3606MB_1118_055_D12	1	1	1	0	1	1	1	1	1	0	1	0	0	0	0	0	0	1	0	0	Negativicutes	f__Veillonellaceae(UID1032)
3606MB_1118_055_D1	1	0	0	1	1	1	1	1	2	0	1	0	0	0	0	0	0	1	1	0	Bacteroidales	o__Bacteroidales(UID2654)
3606MB_1118_055_D2	1	0	0	1	1	1	1	1	2	0	1	0	0	0	0	0	0	3	1	0	Bacteroidales	g__Bacteroides(UID2691)
3606MB_1118_055_D3	0	0	0	0	0	0	0	1	1	0	1	0	0	0	0	1	0	0	0	0	unknown	k__Bacteria(UID2372)
3606MB_1118_055_D4	1	0	0	1	1	1	1	1	2	0	1	0	0	0	0	0	0	1	1	0	Bacteroidales	o__Bacteroidales(UID2654)
3606MB_1118_055_D5	1	0	0	1	1	1	1	1	2	0	1	0	0	0	0	0	0	1	1	0	Bacteroidales	o__Bacteroidales(UID2654)
3606MB_1118_055_D6	1	0	1	1	1	1	1	1	2	0	1	0	0	0	0	0	0	1	1	0	Bacteroidales	o__Bacteroidales(UID2654)
3606MB_1118_055_D7	1	0	0	1	1	1	1	1	2	0	1	0	0	0	0	0	0	1	1	0	Bacteroidales	o__Bacteroidales(UID2654)
3606MB_1118_055_D8	0	0	0	0	0	0	0	1	1	0	1	0	0	2	0	1	0	0	0	1	Clostridiales	o__Clostridiales(UID1226)
3606MB_1118_055_D9	1	0	0	1	1	1	1	1	2	0	1	0	0	0	0	0	0	1	1	0	Bacteroidales	o__Bacteroidales(UID2654)
3606MB_1118_055_E10	1	0	0	1	1	1	1	1	2	0	1	0	0	0	0	0	0	1	1	0	Bacteroidales	o__Bacteroidales(UID2654)
3606MB_1118_055_E12	1	0	1	0	1	1	1	1	1	1	0	0	0	0	0	1	0	0	0	0	Lactobacillales	g__Streptococcus(UID684)
3606MB_1118_055_E1	1	0	0	1	1	1	1	1	2	0	1	0	0	0	0	0	0	2	1	0	Bacteroidales	g__Bacteroides(UID2691)
3606MB_1118_055_E2	1	0	1	1	1	1	1	1	1	1	0	0	0	3	1	0	0	2	1	0	Enterobacterales	f__Enterobacteriaceae(UID5124)
3606MB_1118_055_E3	0	0	0	0	0	0	0	1	1	0	1	0	0	0	0	1	0	0	0	0	Clostridiales	o__Clostridiales(UID1212)
3606MB_1118_055_E4	0	0	0	0	0	0	0	1	1	0	1	0	0	0	0	1	0	0	0	0	Clostridiales	o__Clostridiales(UID1212)
3606MB_1118_055_E5	0	0	0	0	0	0	0	1	1	0	1	0	0	0	0	1	0	0	0	0	unknown	k__Bacteria(UID2372)
3606MB_1118_055_E6	1	0	0	1	1	1	1	1	2	1	0	0	0	0	0	0	0	1	1	0	Bacteroidales	o__Bacteroidales(UID2621)
3606MB_1118_055_E7	0	0	0	0	0	0	0	1	1	0	1	0	0	0	0	1	0	0	0	0	unknown	k__Bacteria(UID2372)
3606MB_1118_055_E8	1	0	1	1	1	1	1	1	2	0	1	0	0	0	0	0	0	1	1	0	Bacteroidales	o__Bacteroidales(UID2657)
3606MB_1118_055_E9	1	0	0	0	1	1	1	1	2	0	1	0	0	0	0	0	0	1	0	0	Bacteroidales	g__Prevotella(UID2724)
3606MB_1118_055_F10	0	0	0	0	0	0	0	1	1	0	1	0	1	0	1	1	0	1	0	1	unknown	k__Bacteria(UID2372)
3606MB_1118_055_F11	1	0	0	0	1	1	1	1	2	0	1	0	0	0	0	0	0	1	0	0	Bacteroidales	g__Prevotella(UID2724)
3606MB_1118_055_F1	1	0	0	1	1	1	1	1	2	0	1	0	0	0	0	0	0	1	1	0	Bacteroidales	o__Bacteroidales(UID2654)
3606MB_1118_055_F2	0	0	0	0	0	0	0	1	1	0	1	0	0	0	0	1	0	0	0	0	unknown	k__Bacteria(UID2372)
3606MB_1118_055_F3	1	0	0	1	1	1	1	1	2	0	1	0	0	0	0	0	0	1	1	0	Bacteroidales	o__Bacteroidales(UID2654)
3606MB_1118_055_F4	0	0	0	0	0	0	0	0	0	0	0	0	0	0	0	0	0	0	0	0	Clostridiales	o__Clostridiales(UID1212)
3606MB_1118_055_F5	1	0	0	0	0	0	0	1	1	0	1	0	0	0	0	1	0	0	0	0	Clostridiales	f__Lachnospiraceae(UID1286)
3606MB_1118_055_F6	1	0	0	0	0	0	0	1	1	0	1	0	0	0	0	1	0	0	0	0	Clostridiales	f__Lachnospiraceae(UID1286)
3606MB_1118_055_F7	0	0	0	0	0	0	0	1	1	0	1	0	0	1	1	0	0	0	0	0	Clostridiales	o__Clostridiales(UID1226)
3606MB_1118_055_F8	1	0	0	0	0	0	0	1	1	0	1	0	0	0	0	1	0	0	0	1	Clostridiales	f__Lachnospiraceae(UID1256)
3606MB_1118_055_F9	1	0	1	1	1	1	1	1	2	0	1	0	0	0	0	0	0	1	1	0	Bacteroidales	o__Bacteroidales(UID2654)
3606MB_1118_055_G10	0	0	0	0	0	0	0	1	1	0	1	0	0	0	0	0	0	0	0	0	Clostridiales	f__Lachnospiraceae(UID1286)
3606MB_1118_055_G11	1	0	0	0	0	0	0	1	1	0	1	0	0	0	0	1	0	0	0	0	Clostridiales	f__Lachnospiraceae(UID1286)
3606MB_1118_055_G12	1	0	0	1	1	1	1	1	2	1	0	0	0	0	0	0	0	1	1	0	Bacteroidales	g__Bacteroides(UID2691)
3606MB_1118_055_G1	1	0	0	1	1	1	1	1	2	0	1	0	0	0	0	0	0	1	0	0	Bacteroidales	g__Prevotella(UID2724)
3606MB_1118_055_G2	1	0	0	0	1	1	1	1	1	0	1	0	0	0	0	1	0	0	0	0	Clostridiales	o__Clostridiales(UID1212)
3606MB_1118_055_G3	1	0	0	0	0	0	0	1	1	0	1	0	0	0	0	1	0	0	0	0	Clostridiales	f__Lachnospiraceae(UID1286)
3606MB_1118_055_G4	1	0	0	1	1	1	1	1	2	0	1	0	0	0	0	0	0	1	1	0	Bacteroidales	o__Bacteroidales(UID2654)
3606MB_1118_055_G5	1	0	1	1	1	1	1	1	2	0	1	0	0	0	0	0	0	1	1	0	Bacteroidales	o__Bacteroidales(UID2654)
3606MB_1118_055_G6	0	1	0	0	1	1	1	1	1	0	1	0	0	1	0	0	0	2	0	0	unknown	p__Proteobacteria(UID3887)
3606MB_1118_055_G7	1	0	0	1	1	1	1	1	2	1	0	0	0	0	0	0	0	1	1	0	Bacteroidales	o__Bacteroidales(UID2621)
3606MB_1118_055_G8	1	0	0	1	1	1	1	1	2	0	1	0	0	0	0	0	0	1	1	0	Bacteroidales	o__Bacteroidales(UID2654)
3606MB_1118_055_G9	1	0	0	1	1	1	1	1	2	0	1	0	0	0	0	0	0	2	1	0	Bacteroidales	g__Bacteroides(UID2691)
3606MB_1118_055_H10	0	0	0	0	0	0	0	1	1	0	1	0	0	0	0	1	0	0	0	0	Clostridiales	o__Clostridiales(UID1212)
3606MB_1118_055_H11	1	0	0	1	1	1	1	1	2	0	1	0	0	0	0	0	0	1	1	0	Bacteroidales	o__Bacteroidales(UID2654)
3606MB_1118_055_H12	1	0	0	1	1	1	1	1	2	0	1	0	0	0	0	0	0	1	1	0	Bacteroidales	o__Bacteroidales(UID2654)
3606MB_1118_055_H1	1	0	0	0	0	0	0	1	1	0	1	0	0	0	0	1	0	0	0	1	Clostridiales	f__Lachnospiraceae(UID1256)
3606MB_1118_055_H2	1	0	0	1	1	1	1	1	2	0	1	0	0	0	0	0	0	1	1	0	Bacteroidales	o__Bacteroidales(UID2654)
3606MB_1118_055_H3	1	0	0	1	1	1	1	1	2	0	1	0	0	0	0	0	0	1	1	0	Bacteroidales	o__Bacteroidales(UID2654)
3606MB_1118_055_H4	1	0	1	0	1	1	1	1	1	1	0	0	0	0	0	1	0	0	0	0	Lactobacillales	g__Streptococcus(UID684)
3606MB_1118_055_H5	1	0	0	0	1	1	1	1	1	0	1	0	0	0	0	1	0	0	0	1	Clostridiales	f__Lachnospiraceae(UID1256)
3606MB_1118_055_H6	1	0	0	1	1	1	1	1	2	0	1	0	0	0	0	0	0	1	1	0	Bacteroidales	o__Bacteroidales(UID2654)
3606MB_1118_055_H7	0	0	0	0	0	0	0	1	1	0	1	0	0	0	0	1	0	0	0	0	Clostridiales	f__Lachnospiraceae(UID1286)
3606MB_1118_055_H8	1	0	0	0	0	0	0	1	1	0	1	0	0	0	0	1	0	0	0	0	Clostridiales	f__Lachnospiraceae(UID1286)
3606MB_1118_055_H9	1	0	1	1	1	1	1	1	2	0	1	0	0	0	0	0	0	1	1	0	Bacteroidales	o__Bacteroidales(UID2654)
3790QQ_0218_002_A10	0	0	0	0	0	0	0	1	1	0	1	0	0	0	0	1	0	1	0	0	Erysipelotrichales	Catenibacterium_sp.3
3790QQ_0218_002_A12	0	0	0	0	0	0	0	1	1	0	1	0	0	0	0	1	0	1	0	0	Erysipelotrichales	Catenibacterium_sp.3
3790QQ_0218_002_A2	0	0	0	0	0	0	0	1	1	0	1	0	0	0	0	1	0	1	0	0	Erysipelotrichales	Catenibacterium_sp.3
3790QQ_0218_002_A3	1	0	0	0	0	0	0	1	1	0	1	0	0	1	0	0	0	1	0	0	Coriobacteriales	Collinsella_sp.6
3790QQ_0218_002_A4	1	0	1	1	1	1	1	1	1	1	1	0	0	3	0	0	0	3	0	0	Enterobacterales	Escherichia_coli
3790QQ_0218_002_A5	0	0	0	0	0	0	0	1	1	0	1	0	0	0	0	1	0	1	0	0	Erysipelotrichales	Catenibacterium_sp.3
3790QQ_0218_002_A7	1	0	1	1	1	1	1	1	1	1	1	0	0	3	0	0	0	2	0	0	Enterobacterales	Escherichia_coli
3790QQ_0218_002_B10	0	0	0	0	0	0	0	1	1	0	1	0	0	2	1	1	0	0	0	1	Unknown	Unknown_genus_45
3790QQ_0218_002_B1	0	0	0	0	0	0	0	1	1	0	1	0	0	0	0	1	0	1	0	0	Erysipelotrichales	Catenibacterium_sp.3
3790QQ_0218_002_B4	1	0	0	0	0	0	0	1	1	0	0	0	0	1	0	0	0	1	0	0	Coriobacteriales	Collinsella_sp.6
3790QQ_0218_002_B5	0	0	0	0	0	0	0	1	1	1	1	0	0	1	1	1	1	0	0	0	Lactobacillales	Enterococcus_hirae
3790QQ_0218_002_B6	1	0	0	0	0	0	0	1	1	0	1	0	0	1	0	0	0	1	0	0	Coriobacteriales	Collinsella_sp.6
3790QQ_0218_002_B7	1	0	0	0	1	1	1	1	1	0	1	0	0	0	0	0	0	0	0	0	Aeromonadales	Succinatimonas_sp.
3790QQ_0218_002_C11	0	0	0	0	0	0	0	1	1	0	1	0	0	0	0	1	0	0	0	0	Unknown	Unknown_genus_38
3790QQ_0218_002_C1	1	0	0	0	0	0	0	1	1	0	1	0	0	1	0	0	0	1	0	0	Coriobacteriales	Collinsella_sp.6
3790QQ_0218_002_C2	1	0	0	0	0	0	0	1	1	1	1	0	0	0	0	1	0	1	0	0	Lactobacillales	Lactococcus_garvieae_3
3790QQ_0218_002_C3	1	0	0	0	0	0	0	1	1	0	1	0	0	1	0	0	0	1	0	0	Coriobacteriales	Collinsella_sp.6
3790QQ_0218_002_C4	0	0	0	0	0	0	0	1	1	0	1	0	0	0	0	1	0	1	0	0	Erysipelotrichales	Catenibacterium_sp.3
3790QQ_0218_002_C5	0	0	0	0	0	0	0	1	1	1	1	0	0	1	1	1	1	0	0	0	Lactobacillales	Enterococcus_hirae
3790QQ_0218_002_C6	0	0	0	0	0	0	0	1	1	0	1	0	0	2	0	1	0	0	0	1	Clostridiales	Clostridium_sp.3
3790QQ_0218_002_C7	1	0	0	0	0	0	0	1	1	0	1	0	0	0	0	0	0	0	0	0	Unknown	Unknown_genus_52
3790QQ_0218_002_C8	1	0	0	0	0	0	0	1	0	0	0	0	0	2	0	0	0	3	0	1	Bifidobacteriales	Bifidobacterium_dentium
3790QQ_0218_002_D10	1	0	0	0	1	1	1	1	1	0	1	0	0	0	0	0	0	0	0	0	Aeromonadales	Succinatimonas_sp.
3790QQ_0218_002_D11	0	0	0	0	0	0	0	1	1	0	1	0	0	0	0	1	0	1	0	0	Erysipelotrichales	Catenibacterium_sp.3
3790QQ_0218_002_D1	1	0	0	0	0	0	0	1	1	1	1	0	0	0	0	1	0	1	0	0	Lactobacillales	Lactococcus_garvieae_3
3790QQ_0218_002_D2	1	0	1	1	1	1	1	1	1	1	1	0	0	3	0	0	0	2	0	0	Enterobacterales	Escherichia_coli
3790QQ_0218_002_D3	0	0	0	0	0	0	0	1	1	0	1	0	0	2	1	1	0	0	0	1	Unknown	Unknown_genus_45
3790QQ_0218_002_D4	1	0	0	0	0	0	0	1	0	0	0	0	0	2	0	0	0	3	0	1	Bifidobacteriales	Bifidobacterium_dentium
3790QQ_0218_002_D5	1	0	0	0	0	0	0	1	1	0	1	0	0	1	0	0	0	1	0	0	Coriobacteriales	Collinsella_sp.6
3790QQ_0218_002_D8	1	0	0	0	0	0	0	1	1	0	1	0	0	1	0	0	0	1	0	0	Coriobacteriales	Collinsella_sp.6
3790QQ_0218_002_E1	1	0	0	0	0	0	0	1	1	1	1	0	0	0	0	1	0	1	0	0	Lactobacillales	Lactococcus_garvieae_3
3790QQ_0218_002_E2	1	0	0	0	0	0	0	1	1	0	1	0	0	1	0	0	0	1	0	0	Coriobacteriales	Collinsella_sp.6
3790QQ_0218_002_E3	1	0	0	0	0	0	0	1	1	0	1	0	0	1	0	0	0	1	0	0	Coriobacteriales	Collinsella_sp.6
3790QQ_0218_002_E4	0	0	0	0	0	0	0	1	1	0	1	0	0	2	0	1	0	0	0	1	Clostridiales	Clostridium_sp.3
3790QQ_0218_002_E5	0	0	0	0	0	0	0	1	1	0	1	0	0	2	1	1	0	0	0	1	Unknown	Unknown_genus_45
3790QQ_0218_002_E6	0	0	0	0	0	0	0	1	1	0	1	0	0	0	0	1	0	1	0	0	Erysipelotrichales	Catenibacterium_sp.3
3790QQ_0218_002_E7	1	0	0	0	1	1	1	1	1	0	1	0	0	0	0	0	0	0	0	0	Aeromonadales	Succinatimonas_sp.
3790QQ_0218_002_E8	1	0	0	0	0	0	0	1	1	0	1	0	0	2	1	1	0	0	0	1	Clostridiales	Blautia_sp.3
3790QQ_0218_002_F10	1	0	0	0	1	1	1	1	1	0	1	0	0	0	0	0	0	0	0	0	Aeromonadales	Succinatimonas_sp.
3790QQ_0218_002_F11	1	0	0	0	0	0	0	1	1	0	1	0	0	0	0	0	0	0	0	0	Unknown	Unknown_genus_52
3790QQ_0218_002_F2	1	0	0	0	0	0	0	1	1	0	1	0	0	1	0	0	0	1	0	0	Coriobacteriales	Collinsella_sp.6
3790QQ_0218_002_F3	1	0	0	0	0	0	0	1	1	0	1	0	0	1	0	0	0	1	0	0	Coriobacteriales	Collinsella_sp.6
3790QQ_0218_002_F5	0	0	0	0	0	0	0	1	1	0	1	0	0	2	1	1	0	0	0	1	Unknown	Unknown_genus_45
3790QQ_0218_002_F6	1	0	0	0	0	0	0	1	0	0	0	0	0	2	0	0	0	3	0	1	Bifidobacteriales	Bifidobacterium_dentium
3790QQ_0218_002_F8	1	0	0	0	1	1	1	1	1	0	1	0	0	0	0	0	0	0	0	0	Aeromonadales	Succinatimonas_sp.
3790QQ_0218_002_F9	1	0	0	0	0	0	0	1	1	1	1	0	0	0	0	1	0	1	0	0	Lactobacillales	Lactococcus_garvieae_3
3790QQ_0218_002_G10	1	0	1	1	1	1	1	1	2	1	0	0	0	0	0	0	0	0	0	0	Bacteroidales	Bacteroides_fragilis
3790QQ_0218_002_G11	1	0	0	0	1	1	1	1	1	0	1	0	0	0	0	0	0	0	0	0	Aeromonadales	Succinatimonas_sp.
3790QQ_0218_002_G12	1	0	0	0	0	0	0	1	1	1	1	0	0	0	0	1	1	0	0	1	Clostridiales	Dorea_sp.1
3790QQ_0218_002_G1	1	0	0	0	0	0	0	1	1	0	1	0	0	1	1	0	0	0	0	1	Clostridiales	Blautia_sp.5
3790QQ_0218_002_G2	1	0	0	0	0	0	0	1	0	0	0	0	0	3	0	0	0	1	0	0	Lactobacillales	Lactobacillus_mucosae
3790QQ_0218_002_G3	0	0	0	0	0	0	0	1	1	0	1	0	0	2	1	1	0	0	0	1	Unknown	Unknown_genus_45
3790QQ_0218_002_G4	1	0	0	0	0	0	0	1	1	0	1	0	0	1	0	0	0	1	0	0	Coriobacteriales	Collinsella_sp.6
3790QQ_0218_002_G5	1	0	0	0	0	0	0	2	1	0	1	0	0	1	0	0	0	1	0	0	Coriobacteriales	Collinsella_sp.6
3790QQ_0218_002_G8	1	0	0	0	0	0	0	1	1	0	1	0	0	1	0	0	0	1	0	0	Coriobacteriales	Collinsella_sp.6
3790QQ_0218_002_G9	0	0	0	0	0	0	0	1	1	0	1	0	0	0	0	1	0	1	0	0	Clostridiales	Oscillibacter_sp.
3790QQ_0218_002_H10	0	0	0	0	0	0	0	1	1	0	1	0	0	0	0	1	0	1	0	0	Erysipelotrichales	Catenibacterium_sp.3
3790QQ_0218_002_H1	1	0	0	0	0	0	0	1	1	1	1	0	0	0	0	1	0	1	0	0	Lactobacillales	Lactococcus_garvieae_3
3790QQ_0218_002_H2	1	0	0	0	0	0	0	0	0	0	0	0	0	2	0	0	0	3	0	1	Bifidobacteriales	Bifidobacterium_dentium
3790QQ_0218_002_H3	1	0	0	0	0	0	0	1	1	0	1	0	0	1	0	0	0	1	0	0	Coriobacteriales	Collinsella_sp.6
3790QQ_0218_002_H4	1	0	0	0	0	0	0	1	1	0	1	0	0	1	0	0	0	1	0	0	Coriobacteriales	Collinsella_sp.6
3790QQ_0218_002_H6	1	0	0	0	0	0	0	1	1	0	1	0	0	0	0	0	0	0	0	0	Unknown	Unknown_genus_52
3790QQ_0218_002_H7	1	0	0	0	1	1	1	1	1	0	1	0	0	0	0	0	0	0	0	0	Aeromonadales	Succinatimonas_sp.
3790QQ_0218_002_H8	1	0	0	0	0	0	0	1	1	0	1	0	0	0	0	0	0	1	0	0	Unknown	Unknown_genus_19
3790QQ_0218_002_H9	0	0	0	0	0	0	0	1	0	0	0	0	0	0	0	0	0	0	0	0	Erysipelotrichales	Holdemanella_sp.
3790QQ_0218_008_A10	1	0	1	1	1	1	1	1	2	1	0	0	0	0	0	0	0	0	0	0	Bacteroidales	Bacteroides_fragilis
3790QQ_0218_008_A11	1	0	0	0	0	0	0	1	1	0	1	0	1	2	0	0	1	0	0	0	Fusobacteriales	Cetobacterium_somerae
3790QQ_0218_008_A12	1	0	1	1	1	1	1	1	2	1	0	0	0	0	0	0	0	0	0	0	Bacteroidales	Bacteroides_fragilis
3790QQ_0218_008_A1	1	0	1	1	1	1	1	1	2	1	0	0	0	0	0	0	0	0	0	0	Bacteroidales	Bacteroides_fragilis
3790QQ_0218_008_A2	1	0	1	1	1	1	1	1	2	1	0	0	0	0	0	0	0	0	0	0	Bacteroidales	Bacteroides_fragilis
3790QQ_0218_008_A3	1	0	1	1	1	1	1	1	2	1	0	0	0	0	0	0	0	0	0	0	Bacteroidales	Bacteroides_fragilis
3790QQ_0218_008_A4	1	0	1	1	1	1	1	1	2	1	0	0	0	0	0	0	0	0	0	0	Bacteroidales	Bacteroides_fragilis
3790QQ_0218_008_A5	1	0	0	0	0	0	0	1	1	0	1	0	1	2	0	0	1	0	0	0	Fusobacteriales	Cetobacterium_somerae
3790QQ_0218_008_A6	1	0	0	0	0	0	0	1	1	0	1	1	1	0	0	0	0	0	0	0	Fusobacteriales	Fusobacterium_varium
3790QQ_0218_008_A7	0	0	1	1	1	1	1	1	2	1	0	0	0	0	0	0	0	0	0	0	Bacteroidales	Bacteroides_fragilis
3790QQ_0218_008_A8	1	0	0	0	0	0	0	1	1	0	1	0	1	2	0	0	1	0	0	0	Fusobacteriales	Cetobacterium_somerae
3790QQ_0218_008_A9	1	0	0	0	0	0	0	1	1	0	1	1	1	0	0	0	0	0	0	0	Fusobacteriales	Fusobacterium_varium
3790QQ_0218_008_B10	0	0	0	0	0	0	0	1	1	0	1	1	1	0	0	0	0	0	0	0	Fusobacteriales	Fusobacterium_varium
3790QQ_0218_008_B11	1	0	1	0	1	1	1	1	2	1	0	0	0	0	0	0	0	0	0	0	Bacteroidales	Bacteroides_fragilis
3790QQ_0218_008_B12	1	0	1	1	1	1	1	1	2	1	0	0	0	0	0	0	0	0	0	0	Bacteroidales	Bacteroides_fragilis
3790QQ_0218_008_B1	1	0	0	0	0	0	0	1	1	0	1	1	1	0	0	0	0	0	0	0	Fusobacteriales	Fusobacterium_varium
3790QQ_0218_008_B3	1	0	1	1	1	1	1	1	2	1	0	0	0	0	0	0	0	0	0	0	Bacteroidales	Bacteroides_fragilis
3790QQ_0218_008_B4	1	0	1	1	1	1	1	1	2	1	0	0	0	0	0	0	0	0	0	0	Bacteroidales	Bacteroides_fragilis
3790QQ_0218_008_B5	1	0	1	1	1	1	1	1	2	1	0	0	0	0	0	0	0	0	0	0	Bacteroidales	Bacteroides_fragilis
3790QQ_0218_008_B6	1	0	0	0	0	0	0	1	1	0	1	1	1	0	0	0	0	0	0	0	Fusobacteriales	Fusobacterium_varium
3790QQ_0218_008_B7	1	0	1	1	1	1	1	1	2	1	0	0	0	0	0	0	0	0	0	0	Bacteroidales	Bacteroides_fragilis
3790QQ_0218_008_B8	1	0	0	0	0	0	0	1	1	0	1	1	1	0	0	0	0	0	0	0	Fusobacteriales	Fusobacterium_varium
3790QQ_0218_008_B9	1	0	0	0	0	0	0	1	1	0	1	1	1	0	0	0	0	0	0	0	Fusobacteriales	Fusobacterium_varium
3790QQ_0218_008_C10	1	0	1	1	1	1	1	1	2	1	0	0	0	0	0	0	0	0	0	0	Bacteroidales	Bacteroides_fragilis
3790QQ_0218_008_C11	1	0	1	1	1	1	1	1	2	1	0	0	0	0	0	0	0	0	0	0	Bacteroidales	Bacteroides_fragilis
3790QQ_0218_008_C12	1	0	1	1	1	1	1	1	2	1	0	0	0	0	0	0	0	0	0	0	Bacteroidales	Bacteroides_fragilis
3790QQ_0218_008_C1	1	0	1	1	1	1	1	1	2	1	0	0	0	0	0	0	0	0	0	0	Bacteroidales	Bacteroides_fragilis
3790QQ_0218_008_C2	1	0	0	0	0	0	0	1	1	0	1	0	1	2	0	0	1	0	0	0	Fusobacteriales	Cetobacterium_somerae
3790QQ_0218_008_C3	1	0	0	0	0	0	0	1	1	0	1	0	1	2	0	0	1	0	0	0	Fusobacteriales	Cetobacterium_somerae
3790QQ_0218_008_C4	1	0	0	0	0	0	0	1	1	0	1	0	1	2	0	0	1	0	0	0	Fusobacteriales	Cetobacterium_somerae
3790QQ_0218_008_C5	1	0	0	0	0	0	0	1	1	0	1	1	1	0	0	0	0	0	0	0	Fusobacteriales	Fusobacterium_varium
3790QQ_0218_008_C6	1	0	1	1	1	1	1	1	2	1	0	0	0	0	0	0	0	0	0	0	Bacteroidales	Bacteroides_fragilis
3790QQ_0218_008_C7	1	0	1	1	1	1	1	1	2	1	0	0	0	0	0	0	0	0	0	0	Bacteroidales	Bacteroides_fragilis
3790QQ_0218_008_C8	0	0	0	0	0	0	0	1	1	0	1	1	1	0	0	0	0	0	0	0	Fusobacteriales	Fusobacterium_varium
3790QQ_0218_008_C9	1	0	1	1	1	1	1	1	2	1	0	0	0	0	0	0	0	0	0	0	Bacteroidales	Bacteroides_fragilis
3790QQ_0218_008_D10	1	0	0	0	0	0	0	1	1	0	1	1	1	0	0	0	0	0	0	0	Fusobacteriales	Fusobacterium_varium
3790QQ_0218_008_D11	1	0	0	0	0	0	0	1	1	0	1	1	1	0	0	0	0	0	0	0	Fusobacteriales	Fusobacterium_varium
3790QQ_0218_008_D12	1	0	1	1	1	1	1	1	2	1	0	0	0	0	0	0	0	0	0	0	Bacteroidales	Bacteroides_fragilis
3790QQ_0218_008_D1	1	0	1	1	1	1	1	1	2	1	0	0	0	0	0	0	0	0	0	0	Bacteroidales	Bacteroides_fragilis
3790QQ_0218_008_D2	1	0	0	0	0	0	0	1	1	0	1	0	1	2	0	0	1	0	0	0	Fusobacteriales	Cetobacterium_somerae
3790QQ_0218_008_D3	1	0	0	0	0	0	0	1	1	0	1	0	1	2	0	0	1	0	0	0	Fusobacteriales	Cetobacterium_somerae
3790QQ_0218_008_D4	1	0	0	0	0	0	0	1	1	0	1	1	1	0	0	0	0	0	0	0	Fusobacteriales	Fusobacterium_varium
3790QQ_0218_008_D6	1	0	0	0	0	0	0	1	1	0	1	1	1	0	0	0	0	0	0	0	Fusobacteriales	Fusobacterium_varium
3790QQ_0218_008_D7	1	0	1	1	1	1	1	1	2	1	0	0	0	0	0	0	0	0	0	0	Bacteroidales	Bacteroides_fragilis
3790QQ_0218_008_D8	1	0	0	0	0	0	0	1	1	0	1	1	1	0	0	0	0	0	0	0	Fusobacteriales	Fusobacterium_varium
3790QQ_0218_008_D9	1	0	0	0	0	0	0	1	1	0	1	1	1	0	0	0	0	0	0	0	Fusobacteriales	Fusobacterium_varium
3790QQ_0218_008_E10	0	0	1	1	1	1	1	1	2	1	0	0	0	0	0	0	0	0	0	0	Bacteroidales	Bacteroides_fragilis
3790QQ_0218_008_E11	1	0	1	1	1	1	1	1	2	1	0	0	0	0	0	0	0	0	0	0	Bacteroidales	Bacteroides_fragilis
3790QQ_0218_008_E12	1	0	1	1	1	1	1	1	2	1	0	0	0	0	0	0	0	0	0	0	Bacteroidales	Bacteroides_fragilis
3790QQ_0218_008_E1	1	0	0	0	0	0	0	1	1	0	1	1	1	0	0	0	0	0	0	0	Fusobacteriales	Fusobacterium_varium
3790QQ_0218_008_E2	1	0	1	1	1	1	1	1	2	1	0	0	0	0	0	0	0	0	0	0	Bacteroidales	Bacteroides_fragilis
3790QQ_0218_008_E3	1	0	1	1	1	1	1	1	2	1	0	0	0	0	0	0	0	0	0	0	Bacteroidales	Bacteroides_fragilis
3790QQ_0218_008_E4	1	0	0	0	0	0	0	1	2	0	1	1	1	0	0	0	0	0	0	0	Fusobacteriales	Fusobacterium_varium
3790QQ_0218_008_E5	1	0	1	1	1	1	1	1	2	1	0	0	0	0	0	0	0	0	0	0	Bacteroidales	Bacteroides_fragilis
3790QQ_0218_008_E6	1	0	0	0	0	0	0	1	1	0	1	0	1	2	0	0	1	0	0	0	Fusobacteriales	Cetobacterium_somerae
3790QQ_0218_008_E7	1	0	1	1	1	1	1	1	2	1	0	0	0	0	0	0	0	0	0	0	Bacteroidales	Bacteroides_fragilis
3790QQ_0218_008_E8	1	0	1	1	1	1	1	1	2	1	0	0	0	0	0	0	0	0	0	0	Bacteroidales	Bacteroides_fragilis
3790QQ_0218_008_E9	1	0	1	1	1	1	1	1	2	1	0	0	0	0	0	0	0	0	0	0	Bacteroidales	Bacteroides_fragilis
3790QQ_0218_008_F10	1	0	0	0	0	0	0	1	1	0	1	1	1	0	0	0	0	0	0	0	Fusobacteriales	Fusobacterium_varium
3790QQ_0218_008_F11	1	0	1	1	1	1	1	1	2	1	0	0	0	0	0	0	0	0	0	0	Bacteroidales	Bacteroides_fragilis
3790QQ_0218_008_F12	1	0	1	1	1	1	1	1	2	1	0	0	0	0	0	0	0	0	0	0	Bacteroidales	Bacteroides_fragilis
3790QQ_0218_008_F1	1	0	1	1	1	1	1	1	2	1	0	0	0	0	0	0	0	0	0	0	Bacteroidales	Bacteroides_fragilis
3790QQ_0218_008_F2	1	0	1	1	1	1	1	1	2	1	0	0	0	0	0	0	0	0	0	0	Bacteroidales	Bacteroides_fragilis
3790QQ_0218_008_F3	1	0	0	0	0	0	0	1	1	0	1	1	1	0	0	0	0	0	0	0	Fusobacteriales	Fusobacterium_varium
3790QQ_0218_008_F4	1	0	1	1	1	1	1	1	1	1	0	0	0	0	0	0	0	0	0	0	Bacteroidales	Bacteroides_fragilis
3790QQ_0218_008_F5	1	0	0	0	0	0	0	1	1	0	1	1	1	0	0	0	0	0	0	0	Fusobacteriales	Fusobacterium_varium
3790QQ_0218_008_F6	1	0	0	0	0	0	0	1	1	0	1	0	1	2	0	0	1	0	0	0	Fusobacteriales	Cetobacterium_somerae
3790QQ_0218_008_F7	1	0	0	0	0	0	0	1	1	0	1	1	1	0	0	0	0	0	0	0	Fusobacteriales	Fusobacterium_varium
3790QQ_0218_008_F8	1	0	0	0	0	0	0	1	1	0	1	1	1	0	0	0	0	0	0	0	Fusobacteriales	Fusobacterium_varium
3790QQ_0218_008_F9	1	0	1	1	1	1	1	1	2	1	0	0	0	0	0	0	0	0	0	0	Bacteroidales	Bacteroides_fragilis
3790QQ_0218_008_G10	1	0	1	1	1	1	1	1	2	1	0	0	0	0	0	0	0	0	0	0	Bacteroidales	Bacteroides_fragilis
3790QQ_0218_008_G11	1	0	0	0	0	0	0	1	1	0	1	0	1	2	0	0	1	0	0	0	Fusobacteriales	Cetobacterium_somerae
3790QQ_0218_008_G12	1	0	1	1	1	1	1	1	2	1	0	0	0	0	0	0	0	0	0	0	Bacteroidales	Bacteroides_fragilis
3790QQ_0218_008_G1	1	0	1	1	1	1	1	1	2	1	0	0	0	0	0	0	0	0	0	0	Bacteroidales	Bacteroides_fragilis
3790QQ_0218_008_G2	1	0	1	1	1	1	1	1	2	1	0	0	0	0	0	0	0	0	0	0	Bacteroidales	Bacteroides_fragilis
3790QQ_0218_008_G3	1	0	1	1	1	1	1	1	2	1	0	0	0	0	0	0	0	0	0	0	Bacteroidales	Bacteroides_fragilis
3790QQ_0218_008_G4	1	0	0	0	0	0	0	1	1	0	1	0	1	2	0	0	1	0	0	0	Fusobacteriales	Cetobacterium_somerae
3790QQ_0218_008_G5	1	0	1	1	1	1	1	1	2	1	0	0	0	0	0	0	0	0	0	0	Bacteroidales	Bacteroides_fragilis
3790QQ_0218_008_G6	1	0	1	1	1	1	1	1	2	1	0	0	0	0	0	0	0	0	0	0	Bacteroidales	Bacteroides_fragilis
3790QQ_0218_008_G7	1	0	1	1	1	1	1	1	2	1	0	0	0	0	0	0	0	0	0	0	Bacteroidales	Bacteroides_fragilis
3790QQ_0218_008_G8	1	0	0	0	0	0	0	1	1	0	1	1	1	0	0	0	0	0	0	0	Fusobacteriales	Fusobacterium_varium
3790QQ_0218_008_G9	1	0	0	0	0	0	0	1	1	0	1	0	1	2	0	0	1	0	0	0	Fusobacteriales	Cetobacterium_somerae
3790QQ_0218_008_H10	1	0	1	1	1	1	1	1	1	1	0	0	0	0	0	0	0	0	0	0	Bacteroidales	Bacteroides_fragilis
3790QQ_0218_008_H11	1	0	1	1	1	1	1	1	2	1	0	0	0	0	0	0	0	0	0	0	Bacteroidales	Bacteroides_fragilis
3790QQ_0218_008_H1	1	0	0	0	0	0	0	1	1	0	1	1	1	0	0	0	0	0	0	0	Fusobacteriales	Fusobacterium_varium
3790QQ_0218_008_H2	1	0	1	1	1	1	1	1	2	1	0	0	0	0	0	0	0	0	0	0	Bacteroidales	Bacteroides_fragilis
3790QQ_0218_008_H3	1	0	1	1	1	1	1	1	2	1	0	0	0	0	0	0	0	0	0	0	Bacteroidales	Bacteroides_fragilis
3790QQ_0218_008_H4	1	0	1	1	1	1	1	1	2	1	0	0	0	0	0	0	0	0	0	0	Bacteroidales	Bacteroides_fragilis
3790QQ_0218_008_H5	1	0	1	1	1	1	1	1	2	1	0	0	0	0	0	0	0	0	0	0	Bacteroidales	Bacteroides_fragilis
3790QQ_0218_008_H6	1	0	0	0	0	0	0	1	1	0	1	0	1	2	0	0	1	0	0	0	Fusobacteriales	Cetobacterium_somerae
3790QQ_0218_008_H7	1	0	1	1	1	1	1	1	1	1	0	0	0	2	0	0	0	3	0	0	Enterobacterales	Morganella_morganii
3790QQ_0218_008_H8	1	0	0	0	0	0	0	1	1	0	1	1	1	0	0	0	0	0	0	0	Fusobacteriales	Fusobacterium_varium
3790QQ_0218_008_H9	1	0	0	0	0	0	0	1	2	0	1	1	1	0	0	0	0	0	0	0	Fusobacteriales	Fusobacterium_varium
3790QQ_0218_017_A1	0	0	1	1	1	1	1	1	2	1	0	0	0	0	0	0	0	0	0	0	Bacteroidales	Bacteroides_fragilis
3790QQ_0218_017_A2	1	0	0	1	1	1	1	1	2	1	0	0	0	0	0	0	0	0	1	0	Bacteroidales	Parabacteroides_distasonis
3790QQ_0218_017_A3	1	0	1	1	1	1	1	1	2	1	0	0	0	0	0	0	0	0	0	0	Bacteroidales	Bacteroides_fragilis
3790QQ_0218_017_A4	1	0	1	1	1	1	1	1	2	1	0	0	0	0	0	0	0	0	0	0	Bacteroidales	Bacteroides_fragilis
3790QQ_0218_017_A5	1	0	0	0	1	1	1	1	2	0	1	0	0	0	0	0	0	1	0	0	Bacteroidales	Prevotella_sp.2
3790QQ_0218_017_A6	1	0	1	1	1	1	1	1	2	1	0	0	0	0	0	0	0	0	0	0	Bacteroidales	Bacteroides_fragilis
3790QQ_0218_017_A7	1	0	1	1	1	1	1	1	2	1	0	0	0	0	0	0	0	0	0	0	Bacteroidales	Bacteroides_fragilis
3790QQ_0218_017_A8	1	0	0	1	1	1	1	1	2	1	0	0	0	0	0	0	0	1	0	0	Bacteroidales	Parabacteroides_sp.
3790QQ_0218_017_A9	0	0	1	1	1	1	1	1	2	1	0	0	0	0	0	0	0	0	0	0	Bacteroidales	Bacteroides_fragilis
3790QQ_0218_017_B1	1	0	0	1	1	1	1	1	2	1	0	0	0	0	0	0	0	1	0	0	Bacteroidales	Parabacteroides_sp.
3790QQ_0218_017_B2	1	0	1	1	1	1	1	1	2	1	0	0	0	0	0	0	0	0	0	0	Bacteroidales	Bacteroides_fragilis
3790QQ_0218_017_B3	1	0	0	1	1	1	1	1	2	1	0	0	0	0	0	0	0	0	1	0	Bacteroidales	Parabacteroides_distasonis
3790QQ_0218_017_B4	1	0	0	0	0	0	0	1	1	0	1	0	1	2	0	0	1	0	0	0	Fusobacteriales	Cetobacterium_somerae
3790QQ_0218_017_B5	1	0	1	1	1	1	1	1	2	1	0	0	0	0	0	0	0	0	0	0	Bacteroidales	Bacteroides_fragilis
3790QQ_0218_017_B6	1	0	1	1	1	1	1	1	2	1	0	0	0	0	0	0	0	0	0	0	Bacteroidales	Bacteroides_fragilis
3790QQ_0218_017_B7	1	0	0	0	1	1	1	1	2	0	1	0	0	0	0	0	0	1	0	0	Bacteroidales	Prevotella_sp.1
3790QQ_0218_017_B8	1	0	1	1	1	1	1	1	2	1	0	0	0	0	0	0	0	0	0	0	Bacteroidales	Bacteroides_fragilis
3790QQ_0218_017_B9	1	0	1	1	1	1	1	1	2	1	0	0	0	0	0	0	0	0	0	0	Bacteroidales	Bacteroides_fragilis
3790QQ_0218_017_C1	1	0	1	1	1	1	1	1	2	1	0	0	0	0	0	0	0	0	0	0	Bacteroidales	Bacteroides_fragilis
3790QQ_0218_017_C2	1	0	0	0	0	0	0	1	1	0	1	0	1	2	0	0	1	0	0	0	Fusobacteriales	Cetobacterium_somerae
3790QQ_0218_017_C3	1	0	0	0	1	1	1	1	2	0	1	0	0	0	0	0	0	1	0	0	Bacteroidales	Prevotella_sp.1
3790QQ_0218_017_C4	1	0	1	1	1	1	1	1	2	1	0	0	0	0	0	0	0	0	0	0	Bacteroidales	Bacteroides_fragilis
3790QQ_0218_017_C5	1	0	1	1	1	1	1	1	2	1	0	0	0	0	0	0	0	0	0	0	Bacteroidales	Bacteroides_fragilis
3790QQ_0218_017_C6	1	0	0	0	1	1	1	1	2	0	1	0	0	0	0	0	0	1	0	0	Bacteroidales	Prevotella_sp.1
3790QQ_0218_017_C7	1	0	1	1	1	1	1	1	2	1	0	0	0	0	0	0	0	0	0	0	Bacteroidales	Bacteroides_fragilis
3790QQ_0218_017_C8	1	0	0	0	1	1	1	1	2	0	1	0	0	0	0	0	0	1	0	0	Bacteroidales	Prevotella_sp.2
3790QQ_0218_017_C9	1	0	1	1	1	1	1	1	2	1	0	0	0	0	0	0	0	0	0	0	Bacteroidales	Bacteroides_fragilis
3790QQ_0218_017_D1	1	0	1	1	1	1	1	1	2	1	0	0	0	0	0	0	0	0	0	0	Bacteroidales	Bacteroides_fragilis
3790QQ_0218_017_D2	1	0	1	1	1	1	1	1	2	1	0	0	0	0	0	0	0	0	0	0	Bacteroidales	Bacteroides_fragilis
3790QQ_0218_017_D3	1	0	1	1	1	1	1	1	2	1	0	0	0	0	0	0	0	0	0	0	Bacteroidales	Bacteroides_fragilis
3790QQ_0218_017_D4	1	0	0	0	1	1	1	1	2	0	1	0	0	0	0	0	0	1	0	0	Bacteroidales	Prevotella_sp.1
3790QQ_0218_017_D5	1	0	0	0	0	0	0	1	1	0	1	1	1	0	0	0	0	0	0	0	Fusobacteriales	Fusobacterium_varium
3790QQ_0218_017_D6	1	0	0	0	1	1	1	1	2	0	1	0	0	0	0	0	0	1	0	0	Bacteroidales	Prevotella_sp.1
3790QQ_0218_017_D7	1	0	1	1	1	1	1	1	2	1	0	0	0	0	0	0	0	0	0	0	Bacteroidales	Bacteroides_fragilis
3790QQ_0218_017_D8	1	0	0	0	1	1	1	1	2	0	1	0	0	0	0	0	0	1	0	0	Bacteroidales	Prevotella_copri
3790QQ_0218_017_D9	1	0	1	1	1	1	1	1	2	1	0	0	0	0	0	0	0	0	0	0	Bacteroidales	Bacteroides_fragilis
3790QQ_0218_017_E1	1	0	1	1	1	1	1	1	2	1	0	0	0	0	0	0	0	0	0	0	Bacteroidales	Bacteroides_fragilis
3790QQ_0218_017_E2	1	0	0	0	1	1	1	1	2	0	1	0	0	0	0	0	0	1	0	0	Bacteroidales	Prevotella_sp.1
3790QQ_0218_017_E3	1	0	0	1	1	1	1	1	2	1	0	0	0	0	0	0	0	0	1	0	Bacteroidales	Parabacteroides_distasonis
3790QQ_0218_017_E4	1	0	0	0	0	0	0	1	1	0	1	0	1	2	0	0	1	0	0	0	Fusobacteriales	Cetobacterium_somerae
3790QQ_0218_017_E5	1	0	1	1	1	1	1	1	2	1	0	0	0	0	0	0	0	0	0	0	Bacteroidales	Bacteroides_fragilis
3790QQ_0218_017_E6	1	0	1	1	1	1	1	1	2	1	0	0	0	0	0	0	0	0	0	0	Bacteroidales	Bacteroides_fragilis
3790QQ_0218_017_E7	1	0	1	1	1	1	1	1	2	1	0	0	0	0	0	0	0	0	0	0	Bacteroidales	Bacteroides_fragilis
3790QQ_0218_017_E9	1	0	1	1	1	1	1	1	2	1	0	0	0	0	0	0	0	0	0	0	Bacteroidales	Bacteroides_fragilis
3790QQ_0218_017_F1	1	0	0	0	0	0	0	1	1	0	1	0	1	2	0	0	1	0	0	0	Fusobacteriales	Cetobacterium_somerae
3790QQ_0218_017_F3	1	0	0	0	1	1	1	1	2	0	1	0	0	0	0	0	0	1	0	0	Bacteroidales	Prevotella_sp.1
3790QQ_0218_017_F4	1	0	1	1	1	1	1	1	2	1	0	0	0	0	0	0	0	0	0	0	Bacteroidales	Bacteroides_fragilis
3790QQ_0218_017_F5	1	0	1	1	1	1	1	1	2	1	0	0	0	0	0	0	0	0	0	0	Bacteroidales	Bacteroides_fragilis
3790QQ_0218_017_F6	1	0	0	0	1	1	1	1	2	0	1	0	0	0	0	0	0	1	0	0	Bacteroidales	Prevotella_sp.1
3790QQ_0218_017_F7	1	0	0	1	1	0	1	1	2	1	0	0	0	0	0	0	0	0	0	0	Unknown	Unknown_genus_31
3790QQ_0218_017_F8	1	0	0	0	0	0	0	1	1	0	1	1	1	0	0	0	0	0	0	0	Fusobacteriales	Fusobacterium_varium
3790QQ_0218_017_F9	1	0	0	1	1	1	1	1	2	1	0	0	0	0	0	0	0	0	1	0	Unknown	Unknown_genus_16
3790QQ_0218_017_G1	1	0	0	0	0	0	0	1	1	0	1	1	1	0	0	0	0	0	0	0	Fusobacteriales	Fusobacterium_varium
3790QQ_0218_017_G2	0	0	1	1	1	1	1	1	2	1	0	0	0	0	0	0	0	0	0	0	Bacteroidales	Bacteroides_fragilis
3790QQ_0218_017_G3	0	0	0	0	1	0	1	1	2	1	0	0	0	0	0	0	0	0	0	0	Bacteroidales	Butyricimonas_virosa
3790QQ_0218_017_G4	1	0	0	1	1	1	1	1	2	1	0	0	0	0	0	0	0	1	0	0	Bacteroidales	Parabacteroides_sp.
3790QQ_0218_017_G5	1	0	0	0	1	1	1	1	2	0	1	0	0	0	0	0	0	1	0	0	Bacteroidales	Prevotella_sp.1
3790QQ_0218_017_G6	1	0	0	0	1	0	1	1	2	1	0	0	0	0	0	0	0	0	0	0	Bacteroidales	Butyricimonas_virosa
3790QQ_0218_017_G7	1	0	0	1	1	0	1	1	2	1	0	0	0	0	0	0	0	0	0	0	Unknown	Unknown_genus_31
3790QQ_0218_017_G8	1	0	1	1	1	1	1	1	2	1	0	0	0	0	0	0	0	0	0	0	Bacteroidales	Bacteroides_fragilis
3790QQ_0218_017_H1	1	0	1	1	1	1	1	1	2	1	0	0	0	0	0	0	0	0	0	0	Bacteroidales	Bacteroides_fragilis
3790QQ_0218_017_H2	1	0	1	1	1	1	1	1	2	1	0	0	0	0	0	0	0	0	0	0	Bacteroidales	Bacteroides_fragilis
3790QQ_0218_017_H3	1	0	0	0	1	1	1	1	2	0	1	0	0	0	0	0	0	1	0	0	Bacteroidales	Prevotella_sp.1
3790QQ_0218_017_H4	1	0	1	1	1	1	1	1	2	1	0	0	0	0	0	0	0	0	0	0	Bacteroidales	Bacteroides_fragilis
3790QQ_0218_017_H5	1	0	1	1	1	1	1	1	2	1	0	0	0	0	0	0	0	0	0	0	Bacteroidales	Bacteroides_fragilis
3790QQ_0218_017_H6	1	0	1	1	1	1	1	1	2	1	0	0	0	0	0	0	0	0	0	0	Bacteroidales	Bacteroides_fragilis
3790QQ_0218_017_H7	0	0	1	1	1	1	1	1	2	1	0	0	0	0	0	0	0	0	0	0	Bacteroidales	Bacteroides_fragilis
3790QQ_0918_046_A10	0	0	0	0	0	0	0	1	1	1	1	0	0	0	0	1	1	0	0	0	Lactobacillales	o__Lactobacillales(UID544)
3790QQ_0918_046_A11	1	0	0	0	0	0	0	1	1	1	1	0	0	0	0	1	1	0	0	0	Lactobacillales	o__Lactobacillales(UID544)
3790QQ_0918_046_A12	1	0	0	0	0	0	0	1	1	1	1	0	0	0	0	1	1	0	0	0	Lactobacillales	o__Lactobacillales(UID544)
3790QQ_0918_046_A1	1	0	0	0	0	0	0	1	1	1	0	0	1	1	1	1	1	0	0	1	Clostridiales	o__Clostridiales(UID1120)
3790QQ_0918_046_A3	1	0	0	0	0	0	0	1	1	1	1	0	0	0	0	1	1	0	0	0	Lactobacillales	o__Lactobacillales(UID544)
3790QQ_0918_046_A4	1	0	0	0	0	0	0	1	1	1	0	0	0	0	0	1	0	0	0	1	Clostridiales	o__Clostridiales(UID1375)
3790QQ_0918_046_A6	1	0	0	0	0	0	0	1	1	1	1	0	0	0	0	1	2	0	0	0	Lactobacillales	o__Lactobacillales(UID544)
3790QQ_0918_046_A7	1	0	0	0	0	0	0	1	1	1	1	0	0	0	0	1	1	0	0	0	Lactobacillales	o__Lactobacillales(UID544)
3790QQ_0918_046_A9	1	0	0	0	0	0	0	1	1	1	1	0	0	0	0	1	1	0	0	0	Lactobacillales	o__Lactobacillales(UID544)
3790QQ_0918_046_B11	1	0	0	0	0	0	0	1	1	1	1	0	0	0	0	1	1	0	0	0	Lactobacillales	o__Lactobacillales(UID544)
3790QQ_0918_046_B12	1	0	0	0	0	0	0	1	1	1	1	0	0	0	0	1	1	0	0	0	Lactobacillales	o__Lactobacillales(UID544)
3790QQ_0918_046_B1	1	0	0	0	0	0	0	1	1	1	1	0	0	0	0	1	1	0	0	0	Lactobacillales	o__Lactobacillales(UID544)
3790QQ_0918_046_B3	1	0	0	0	0	0	0	1	1	1	1	0	0	0	0	1	2	0	0	0	Lactobacillales	o__Lactobacillales(UID544)
3790QQ_0918_046_B4	1	0	0	0	0	0	0	1	1	1	1	0	0	0	0	1	1	0	0	0	Lactobacillales	o__Lactobacillales(UID544)
3790QQ_0918_046_B5	1	0	0	0	0	0	0	1	1	1	1	0	0	0	0	1	1	0	0	0	Lactobacillales	o__Lactobacillales(UID544)
3790QQ_0918_046_B7	1	0	0	0	0	0	0	1	1	1	1	0	0	0	0	1	1	0	0	0	Lactobacillales	o__Lactobacillales(UID544)
3790QQ_0918_046_B8	1	0	0	0	0	0	0	1	1	1	1	0	0	0	0	1	1	0	0	0	Lactobacillales	o__Lactobacillales(UID544)
3790QQ_0918_046_C10	1	0	0	0	0	0	0	1	1	1	1	0	0	0	0	1	1	0	0	0	Lactobacillales	o__Lactobacillales(UID544)
3790QQ_0918_046_C12	1	0	0	0	0	0	0	1	1	1	1	0	0	0	0	1	1	0	0	0	Lactobacillales	o__Lactobacillales(UID544)
3790QQ_0918_046_C1	1	0	0	0	0	0	0	1	1	1	1	0	0	0	0	1	1	0	0	0	Lactobacillales	o__Lactobacillales(UID544)
3790QQ_0918_046_C2	1	0	0	0	0	0	0	1	1	1	1	0	0	0	0	1	1	0	0	0	Lactobacillales	o__Lactobacillales(UID544)
3790QQ_0918_046_C3	1	0	0	0	0	0	0	1	1	1	1	0	0	0	0	1	2	0	0	0	Lactobacillales	o__Lactobacillales(UID544)
3790QQ_0918_046_C4	1	0	0	0	0	0	0	1	1	1	1	0	0	0	0	1	2	0	0	0	Lactobacillales	o__Lactobacillales(UID544)
3790QQ_0918_046_C6	1	0	0	0	0	0	0	1	1	1	1	0	0	0	0	1	1	0	0	0	Lactobacillales	o__Lactobacillales(UID544)
3790QQ_0918_046_C8	1	0	0	0	0	0	0	1	1	1	0	0	0	0	0	1	0	0	0	1	Clostridiales	o__Clostridiales(UID1375)
3790QQ_0918_046_C9	1	0	0	0	0	0	0	1	1	1	1	0	0	0	0	1	2	0	0	0	Lactobacillales	o__Lactobacillales(UID544)
3790QQ_0918_046_D10	1	0	0	0	0	0	0	1	1	1	1	0	0	0	0	1	1	0	0	0	Lactobacillales	o__Lactobacillales(UID544)
3790QQ_0918_046_D1	1	0	0	0	0	0	0	1	1	1	1	0	0	0	0	1	1	0	0	0	Lactobacillales	o__Lactobacillales(UID544)
3790QQ_0918_046_D2	1	0	0	0	0	0	0	1	1	1	1	0	0	0	0	1	1	0	0	0	Lactobacillales	o__Lactobacillales(UID544)
3790QQ_0918_046_D3	1	0	0	0	0	0	0	1	1	1	0	0	1	1	1	1	1	0	0	1	Clostridiales	o__Clostridiales(UID1120)
3790QQ_0918_046_D5	1	0	0	0	0	0	0	1	1	1	1	0	0	0	0	1	2	0	0	0	Lactobacillales	o__Lactobacillales(UID544)
3790QQ_0918_046_D7	1	0	0	0	0	0	0	1	1	1	1	0	0	0	0	1	1	0	0	0	Lactobacillales	o__Lactobacillales(UID544)
3790QQ_0918_046_D8	1	0	0	0	0	0	0	1	1	1	1	0	0	0	0	1	1	0	0	0	Lactobacillales	o__Lactobacillales(UID544)
3790QQ_0918_046_E10	1	0	0	0	0	0	0	1	1	1	1	0	0	0	0	1	1	0	0	0	Lactobacillales	o__Lactobacillales(UID544)
3790QQ_0918_046_E11	1	0	0	0	0	0	0	1	1	1	1	0	0	0	0	1	1	0	0	0	Lactobacillales	o__Lactobacillales(UID544)
3790QQ_0918_046_E12	1	0	0	0	0	0	0	1	1	1	1	0	0	0	0	1	1	0	0	0	Lactobacillales	o__Lactobacillales(UID544)
3790QQ_0918_046_E1	1	0	0	0	0	0	0	1	1	1	0	0	1	1	1	1	1	0	0	1	Clostridiales	o__Clostridiales(UID1120)
3790QQ_0918_046_E2	1	0	0	0	0	0	0	1	1	1	0	0	0	0	0	1	0	0	0	1	Clostridiales	o__Clostridiales(UID1375)
3790QQ_0918_046_E3	1	0	0	0	0	0	0	1	1	1	1	0	0	0	0	1	1	0	0	0	Lactobacillales	o__Lactobacillales(UID544)
3790QQ_0918_046_E4	1	0	0	0	0	0	0	1	1	1	1	0	0	0	0	1	1	0	0	0	Lactobacillales	o__Lactobacillales(UID544)
3790QQ_0918_046_E5	1	0	0	0	0	0	0	1	1	1	1	0	0	0	0	1	1	0	0	0	Lactobacillales	o__Lactobacillales(UID544)
3790QQ_0918_046_E6	1	0	0	0	0	0	0	1	1	1	1	0	0	0	0	1	1	0	0	0	Lactobacillales	o__Lactobacillales(UID544)
3790QQ_0918_046_E7	1	0	0	0	0	0	0	1	1	1	0	0	0	0	0	1	0	0	0	1	Clostridiales	o__Clostridiales(UID1375)
3790QQ_0918_046_E8	1	0	0	0	0	0	0	1	1	1	1	0	0	0	0	1	2	0	0	0	Lactobacillales	o__Lactobacillales(UID544)
3790QQ_0918_046_E9	1	0	0	0	0	0	0	1	1	1	1	0	0	0	0	1	1	0	0	0	Lactobacillales	o__Lactobacillales(UID544)
3790QQ_0918_046_F10	1	0	0	0	0	0	0	1	1	1	1	0	0	0	0	1	1	0	0	0	Lactobacillales	o__Lactobacillales(UID544)
3790QQ_0918_046_F11	1	0	0	0	0	0	0	1	1	1	1	0	0	0	0	1	1	0	0	0	Lactobacillales	o__Lactobacillales(UID544)
3790QQ_0918_046_F12	1	0	0	0	0	0	0	1	1	1	1	0	0	0	0	1	1	0	0	0	Lactobacillales	o__Lactobacillales(UID544)
3790QQ_0918_046_F1	1	0	0	0	0	0	0	1	1	1	0	0	1	1	1	1	1	0	0	1	Clostridiales	o__Clostridiales(UID1120)
3790QQ_0918_046_F2	1	0	0	0	0	0	0	1	1	1	0	0	1	1	1	1	1	0	0	1	Clostridiales	o__Clostridiales(UID1120)
3790QQ_0918_046_F3	1	0	0	0	0	0	0	1	1	1	1	0	0	0	0	1	1	0	0	0	Lactobacillales	o__Lactobacillales(UID544)
3790QQ_0918_046_F4	1	0	0	0	0	0	0	1	1	1	1	0	0	0	0	1	2	0	0	0	Lactobacillales	o__Lactobacillales(UID544)
3790QQ_0918_046_F5	0	0	0	0	0	0	0	1	1	1	1	0	0	1	1	0	0	1	0	0	Lactobacillales	o__Lactobacillales(UID544)
3790QQ_0918_046_F6	1	0	0	0	0	0	0	1	1	1	1	0	0	0	0	1	1	0	0	0	Lactobacillales	o__Lactobacillales(UID544)
3790QQ_0918_046_F7	1	0	0	0	0	0	0	1	1	1	1	0	0	0	0	1	2	0	0	0	Lactobacillales	o__Lactobacillales(UID544)
3790QQ_0918_046_F8	1	0	0	0	0	0	0	1	1	1	1	0	0	0	0	1	1	0	0	0	Lactobacillales	o__Lactobacillales(UID544)
3790QQ_0918_046_F9	1	0	0	0	0	0	0	1	1	1	1	0	0	0	0	1	1	0	0	0	Lactobacillales	o__Lactobacillales(UID544)
3790QQ_0918_046_G10	1	0	0	0	0	0	0	1	1	1	1	0	0	0	0	1	1	0	0	0	Lactobacillales	o__Lactobacillales(UID544)
3790QQ_0918_046_G11	1	0	0	0	0	0	0	1	1	1	1	0	0	0	0	1	1	0	0	0	Lactobacillales	o__Lactobacillales(UID544)
3790QQ_0918_046_G12	1	0	0	0	0	0	0	1	1	1	1	0	0	0	0	1	1	0	0	0	Lactobacillales	o__Lactobacillales(UID544)
3790QQ_0918_046_G1	1	0	0	0	0	0	0	1	1	1	1	0	0	0	0	1	1	0	0	0	Lactobacillales	o__Lactobacillales(UID544)
3790QQ_0918_046_G2	1	0	0	0	0	0	0	1	1	1	1	0	0	0	0	1	1	0	0	0	Lactobacillales	o__Lactobacillales(UID544)
3790QQ_0918_046_G3	1	0	0	0	0	0	0	1	1	1	1	0	0	0	0	1	2	0	0	0	Lactobacillales	o__Lactobacillales(UID544)
3790QQ_0918_046_G4	1	0	0	0	0	0	0	1	1	1	0	0	1	1	1	1	1	0	0	1	Clostridiales	o__Clostridiales(UID1120)
3790QQ_0918_046_G5	1	0	0	0	0	0	0	1	0	1	1	0	0	0	0	1	1	0	0	0	Lactobacillales	o__Lactobacillales(UID544)
3790QQ_0918_046_G6	1	0	0	0	0	0	0	1	1	1	1	0	0	0	0	1	1	0	0	0	Lactobacillales	o__Lactobacillales(UID544)
3790QQ_0918_046_G9	1	0	0	0	0	0	0	1	1	1	1	0	0	0	0	1	2	0	0	0	Lactobacillales	o__Lactobacillales(UID544)
3790QQ_0918_046_H10	1	0	0	0	0	0	0	1	1	1	1	0	0	0	0	1	1	0	0	0	Lactobacillales	o__Lactobacillales(UID544)
3790QQ_0918_046_H11	1	0	0	0	0	0	0	1	1	1	1	0	0	0	0	1	1	0	0	0	Lactobacillales	o__Lactobacillales(UID544)
3790QQ_0918_046_H1	1	0	0	0	0	0	0	1	1	1	0	0	0	0	0	1	0	0	0	1	Clostridiales	o__Clostridiales(UID1375)
3790QQ_0918_046_H2	1	0	0	0	0	0	0	1	1	1	1	0	0	0	0	1	1	0	0	0	Lactobacillales	o__Lactobacillales(UID544)
3790QQ_0918_046_H3	1	0	0	0	0	0	0	1	1	1	0	0	1	1	1	1	1	0	0	1	Clostridiales	o__Clostridiales(UID1120)
3790QQ_0918_046_H4	1	0	0	0	0	0	0	1	1	1	1	0	0	0	0	1	1	0	0	0	Lactobacillales	o__Lactobacillales(UID544)
3790QQ_0918_046_H5	1	0	0	0	0	0	0	1	1	1	1	0	0	0	0	1	1	0	0	0	Lactobacillales	o__Lactobacillales(UID544)
3790QQ_0918_046_H6	1	0	0	0	1	1	1	1	1	1	0	0	0	0	0	0	0	2	0	0	Bacillales	f__Bacillaceae(UID829)
3790QQ_0918_046_H7	1	0	0	0	0	0	0	1	1	1	1	0	0	0	0	1	1	0	0	0	Lactobacillales	o__Lactobacillales(UID544)
3790QQ_0918_046_H8	1	0	0	0	0	0	0	1	1	1	1	0	0	0	0	1	1	0	0	0	Lactobacillales	o__Lactobacillales(UID544)
3790QQ_0918_046_H9	1	0	0	0	0	0	0	1	1	1	1	0	0	0	0	1	2	0	0	0	Lactobacillales	o__Lactobacillales(UID544)
4013HR_0218_048_A10	1	0	0	0	1	1	1	1	2	0	1	0	0	0	0	0	0	1	0	0	Bacteroidales	g__Prevotella(UID2724)
4013HR_0218_048_A11	1	0	1	1	1	1	1	1	2	0	1	0	0	0	0	0	0	1	1	0	Bacteroidales	o__Bacteroidales(UID2654)
4013HR_0218_048_A1	1	0	1	1	1	1	1	1	2	0	1	0	0	0	0	0	0	1	1	0	Bacteroidales	o__Bacteroidales(UID2654)
4013HR_0218_048_A3	1	0	1	1	1	1	1	1	2	0	1	0	0	0	0	0	0	1	1	0	Bacteroidales	o__Bacteroidales(UID2654)
4013HR_0218_048_A4	1	0	1	1	1	1	1	1	2	0	1	0	0	0	0	0	0	1	1	0	Bacteroidales	o__Bacteroidales(UID2654)
4013HR_0218_048_A5	1	0	1	1	1	1	1	1	2	1	0	0	0	0	0	0	0	1	0	0	Bacteroidales	o__Bacteroidales(UID2621)
4013HR_0218_048_A7	1	0	1	1	1	1	1	1	2	0	1	0	0	0	0	0	0	1	1	0	Bacteroidales	o__Bacteroidales(UID2654)
4013HR_0218_048_A8	1	0	0	0	1	1	1	1	2	0	1	0	0	0	0	0	0	1	0	0	Bacteroidales	g__Prevotella(UID2724)
4013HR_0218_048_A9	1	0	1	1	1	1	1	1	2	0	1	0	0	0	0	0	0	1	1	0	Bacteroidales	o__Bacteroidales(UID2654)
4013HR_0218_048_B10	1	0	1	1	1	1	1	1	2	0	1	0	0	0	0	0	0	1	1	0	Bacteroidales	o__Bacteroidales(UID2654)
4013HR_0218_048_B11	1	0	1	1	1	1	1	1	2	0	1	0	0	0	0	0	0	1	1	0	Bacteroidales	o__Bacteroidales(UID2654)
4013HR_0218_048_B1	1	0	1	1	1	1	1	1	2	0	1	0	0	0	0	0	0	1	1	0	Bacteroidales	o__Bacteroidales(UID2657)
4013HR_0218_048_B2	1	0	1	1	1	1	1	1	2	0	1	0	0	0	0	0	0	1	1	0	Bacteroidales	o__Bacteroidales(UID2654)
4013HR_0218_048_B3	1	0	1	1	1	1	1	1	2	1	0	0	0	0	0	0	0	1	0	0	Bacteroidales	o__Bacteroidales(UID2621)
4013HR_0218_048_B4	1	0	0	1	1	1	1	1	2	0	1	0	0	0	0	0	0	1	0	0	Bacteroidales	g__Bacteroides(UID2691)
4013HR_0218_048_B5	1	0	0	1	1	1	1	1	2	1	0	0	0	0	0	0	0	1	1	0	Bacteroidales	o__Bacteroidales(UID2621)
4013HR_0218_048_B6	1	0	0	1	1	1	1	1	2	0	0	0	0	0	0	0	0	1	1	0	Bacteroidales	g__Bacteroides(UID2691)
4013HR_0218_048_B7	1	0	1	1	1	1	1	1	2	0	1	0	0	0	0	0	0	1	1	0	Bacteroidales	o__Bacteroidales(UID2654)
4013HR_0218_048_B8	1	0	1	1	1	1	1	1	2	0	1	0	0	0	0	0	0	1	1	0	Bacteroidales	o__Bacteroidales(UID2654)
4013HR_0218_048_B9	1	0	0	1	1	1	1	1	2	1	0	0	0	0	0	0	0	1	1	0	Bacteroidales	o__Bacteroidales(UID2621)
4013HR_0218_048_C10	1	0	1	1	1	1	1	1	2	0	1	0	0	0	0	0	0	1	1	0	Bacteroidales	o__Bacteroidales(UID2657)
4013HR_0218_048_C11	1	0	1	1	1	1	1	1	2	0	1	0	0	0	0	0	0	1	1	0	Bacteroidales	o__Bacteroidales(UID2654)
4013HR_0218_048_C12	1	0	1	1	1	1	1	1	2	0	1	0	0	0	0	0	0	1	1	0	Bacteroidales	o__Bacteroidales(UID2654)
4013HR_0218_048_C1	1	0	1	1	1	1	1	1	2	0	1	0	0	0	0	0	0	1	1	0	Bacteroidales	o__Bacteroidales(UID2654)
4013HR_0218_048_C2	1	0	0	1	1	1	1	1	2	0	1	0	0	0	0	0	0	3	1	0	Bacteroidales	g__Bacteroides(UID2691)
4013HR_0218_048_C3	1	0	1	1	1	1	1	1	2	0	1	0	0	0	0	0	0	1	1	0	Bacteroidales	o__Bacteroidales(UID2654)
4013HR_0218_048_C4	1	0	1	1	1	1	1	1	2	0	1	0	0	0	0	0	0	1	1	0	Bacteroidales	o__Bacteroidales(UID2654)
4013HR_0218_048_C5	1	0	1	1	1	1	1	1	2	0	1	0	0	0	0	0	0	1	1	0	Bacteroidales	o__Bacteroidales(UID2654)
4013HR_0218_048_C6	1	0	1	1	1	1	1	1	2	0	1	0	0	0	0	0	0	1	1	0	Bacteroidales	o__Bacteroidales(UID2654)
4013HR_0218_048_C7	1	0	1	1	1	1	1	1	2	0	1	0	0	0	0	0	0	1	1	0	Bacteroidales	o__Bacteroidales(UID2654)
4013HR_0218_048_C8	1	0	1	1	1	1	1	1	2	0	1	0	0	0	0	0	0	1	1	0	Bacteroidales	o__Bacteroidales(UID2654)
4013HR_0218_048_C9	1	0	0	1	1	1	1	1	2	1	0	0	0	0	0	0	0	1	1	0	Bacteroidales	o__Bacteroidales(UID2621)
4013HR_0218_048_D10	1	0	1	1	1	1	1	1	2	0	1	0	0	0	0	0	0	1	1	0	Bacteroidales	o__Bacteroidales(UID2654)
4013HR_0218_048_D11	1	0	1	1	1	1	1	1	2	0	1	0	0	0	0	0	0	1	1	0	Bacteroidales	o__Bacteroidales(UID2654)
4013HR_0218_048_D1	1	0	0	0	1	0	1	1	2	0	1	0	0	0	0	0	0	1	0	0	unknown	k__Bacteria(UID2569)
4013HR_0218_048_D2	1	0	1	1	1	1	1	1	2	0	1	0	0	0	0	0	0	1	1	0	Bacteroidales	o__Bacteroidales(UID2654)
4013HR_0218_048_D3	1	0	1	1	1	1	1	1	2	0	1	0	0	0	0	0	0	1	1	0	Bacteroidales	o__Bacteroidales(UID2654)
4013HR_0218_048_D4	1	0	1	1	1	1	1	1	2	1	0	0	0	0	0	0	0	1	0	0	Bacteroidales	o__Bacteroidales(UID2621)
4013HR_0218_048_D5	1	0	1	1	1	1	1	1	2	0	1	0	0	0	0	0	0	1	1	0	Bacteroidales	o__Bacteroidales(UID2654)
4013HR_0218_048_D6	1	0	0	0	1	1	1	1	2	0	1	0	0	0	0	0	0	1	0	0	Bacteroidales	g__Prevotella(UID2724)
4013HR_0218_048_D7	1	0	1	1	1	1	1	1	2	0	1	0	0	0	0	0	0	1	1	0	Bacteroidales	o__Bacteroidales(UID2654)
4013HR_0218_048_D8	1	0	1	1	1	1	1	1	2	0	1	0	0	0	0	0	0	0	0	0	Bacteroidales	o__Bacteroidales(UID2657)
4013HR_0218_048_D9	1	0	0	1	1	1	1	1	2	1	0	0	0	0	0	0	0	1	1	0	Bacteroidales	o__Bacteroidales(UID2621)
4013HR_0218_048_E10	1	0	1	1	1	1	1	1	2	0	1	0	0	0	0	0	0	1	1	0	Bacteroidales	o__Bacteroidales(UID2657)
4013HR_0218_048_E11	1	0	0	0	1	1	1	1	2	0	1	0	0	0	0	0	0	1	0	0	Bacteroidales	g__Prevotella(UID2724)
4013HR_0218_048_E1	1	0	1	1	1	1	1	1	2	0	1	0	0	0	0	0	0	1	1	0	Bacteroidales	o__Bacteroidales(UID2654)
4013HR_0218_048_E2	1	0	1	1	1	1	1	1	2	0	1	0	0	0	0	0	0	1	1	0	Bacteroidales	o__Bacteroidales(UID2654)
4013HR_0218_048_E3	1	0	1	1	1	1	1	1	2	0	1	0	0	0	0	0	0	1	1	0	Bacteroidales	o__Bacteroidales(UID2654)
4013HR_0218_048_E4	1	0	1	1	1	1	1	1	2	0	1	0	0	0	0	0	0	1	1	0	Bacteroidales	o__Bacteroidales(UID2654)
4013HR_0218_048_E5	1	0	1	1	1	1	1	1	2	0	1	0	0	0	0	0	0	1	1	0	Bacteroidales	o__Bacteroidales(UID2654)
4013HR_0218_048_E6	1	0	1	1	1	1	1	1	2	0	1	0	0	0	0	0	0	1	1	0	Bacteroidales	o__Bacteroidales(UID2654)
4013HR_0218_048_E7	1	0	0	1	1	1	1	1	2	0	1	0	0	0	0	0	0	1	0	0	Bacteroidales	g__Bacteroides(UID2691)
4013HR_0218_048_E8	1	0	0	1	1	1	1	1	2	1	0	0	0	0	0	0	0	1	1	0	Bacteroidales	o__Bacteroidales(UID2621)
4013HR_0218_048_E9	1	0	0	1	1	1	1	1	2	1	0	0	0	0	0	0	0	1	1	0	Bacteroidales	o__Bacteroidales(UID2621)
4013HR_0218_048_F10	1	0	1	1	1	1	1	1	2	0	1	0	0	0	0	0	0	1	1	0	Bacteroidales	o__Bacteroidales(UID2657)
4013HR_0218_048_F11	1	0	1	1	1	1	1	1	2	0	1	0	0	0	0	0	0	1	1	0	Bacteroidales	o__Bacteroidales(UID2654)
4013HR_0218_048_F12	1	0	0	1	1	1	1	1	2	0	1	0	0	0	0	0	0	1	0	0	Bacteroidales	g__Bacteroides(UID2691)
4013HR_0218_048_F1	1	0	1	1	1	1	1	1	2	0	1	0	0	0	0	0	0	1	1	0	Bacteroidales	o__Bacteroidales(UID2654)
4013HR_0218_048_F2	1	0	1	1	1	1	1	1	2	0	1	0	0	0	0	0	0	1	1	0	Bacteroidales	o__Bacteroidales(UID2657)
4013HR_0218_048_F3	1	0	1	1	1	1	1	1	2	0	1	0	0	0	0	0	0	1	1	0	Bacteroidales	o__Bacteroidales(UID2654)
4013HR_0218_048_F4	1	0	1	1	0	1	1	1	2	0	1	0	0	0	0	0	0	1	1	0	Bacteroidales	o__Bacteroidales(UID2657)
4013HR_0218_048_F5	1	0	1	1	1	1	1	1	2	0	1	0	0	0	0	0	0	1	1	0	Bacteroidales	o__Bacteroidales(UID2654)
4013HR_0218_048_F6	1	0	1	1	1	1	1	1	2	0	1	0	0	0	0	0	0	1	1	0	Bacteroidales	o__Bacteroidales(UID2657)
4013HR_0218_048_F7	0	0	1	1	1	1	1	1	2	0	1	0	0	0	0	0	0	1	1	0	Bacteroidales	o__Bacteroidales(UID2654)
4013HR_0218_048_F8	1	0	1	1	1	1	1	1	2	0	1	0	0	0	0	0	0	1	1	0	Bacteroidales	o__Bacteroidales(UID2654)
4013HR_0218_048_F9	1	0	0	1	1	1	1	1	2	0	1	0	0	0	0	0	0	1	0	0	Bacteroidales	g__Bacteroides(UID2691)
4013HR_0218_048_G10	1	0	1	1	1	1	1	1	2	0	1	0	0	0	0	0	0	1	1	0	Bacteroidales	o__Bacteroidales(UID2654)
4013HR_0218_048_G11	1	0	1	1	1	1	1	1	2	0	1	0	0	0	0	0	0	1	1	0	Bacteroidales	o__Bacteroidales(UID2654)
4013HR_0218_048_G12	1	0	0	1	1	1	1	1	2	0	1	0	0	0	0	0	0	3	1	0	Bacteroidales	g__Bacteroides(UID2691)
4013HR_0218_048_G1	1	0	1	1	1	1	1	1	2	0	1	0	0	0	0	0	0	1	1	0	Bacteroidales	o__Bacteroidales(UID2654)
4013HR_0218_048_G2	1	0	1	1	1	1	1	1	2	0	1	0	0	0	0	0	0	1	1	0	Bacteroidales	o__Bacteroidales(UID2654)
4013HR_0218_048_G3	1	0	1	1	1	1	1	1	2	1	0	0	0	0	0	0	0	1	0	0	Bacteroidales	o__Bacteroidales(UID2621)
4013HR_0218_048_G4	1	0	0	1	1	1	1	1	2	0	1	0	0	0	0	0	0	1	0	0	Bacteroidales	g__Bacteroides(UID2691)
4013HR_0218_048_G5	1	0	1	1	1	1	1	1	2	0	1	0	0	0	0	0	0	1	1	0	Bacteroidales	o__Bacteroidales(UID2657)
4013HR_0218_048_G6	1	0	1	1	1	1	1	1	2	0	1	0	0	0	0	0	0	1	1	0	Bacteroidales	o__Bacteroidales(UID2654)
4013HR_0218_048_G7	1	0	1	1	1	1	1	1	2	0	1	0	0	0	0	0	0	1	1	0	Bacteroidales	o__Bacteroidales(UID2654)
4013HR_0218_048_G8	1	0	1	1	1	1	1	1	2	0	1	0	0	0	0	0	0	1	1	0	Bacteroidales	o__Bacteroidales(UID2654)
4013HR_0218_048_G9	1	0	0	1	1	1	1	1	2	1	0	0	0	0	0	0	0	1	1	0	Bacteroidales	g__Bacteroides(UID2691)
4013HR_0218_048_H10	1	0	0	0	1	1	1	1	2	0	1	0	0	0	0	0	0	1	0	0	Bacteroidales	g__Prevotella(UID2724)
4013HR_0218_048_H11	1	0	1	1	1	1	1	1	2	0	1	0	0	0	0	0	0	1	1	0	Bacteroidales	o__Bacteroidales(UID2654)
4013HR_0218_048_H12	1	0	1	1	1	1	1	1	2	1	0	0	0	0	0	0	0	1	0	0	Bacteroidales	o__Bacteroidales(UID2621)
4013HR_0218_048_H1	1	0	0	0	1	1	1	1	2	0	1	0	0	0	0	0	0	1	0	0	Bacteroidales	g__Prevotella(UID2724)
4013HR_0218_048_H2	1	0	1	1	1	1	1	1	2	0	1	0	0	0	0	0	0	1	1	0	Bacteroidales	o__Bacteroidales(UID2654)
4013HR_0218_048_H3	1	0	1	1	1	1	1	1	2	0	1	0	0	0	0	0	0	1	1	0	Bacteroidales	o__Bacteroidales(UID2654)
4013HR_0218_048_H4	0	0	0	0	1	0	1	1	2	0	1	0	0	0	0	0	0	1	0	0	unknown	k__Bacteria(UID2569)
4013HR_0218_048_H5	1	0	1	1	1	1	1	1	2	0	1	0	0	0	0	0	0	1	1	0	Bacteroidales	o__Bacteroidales(UID2654)
4013HR_0218_048_H6	1	0	1	1	1	1	1	1	2	0	1	0	0	0	0	0	0	1	1	0	Bacteroidales	o__Bacteroidales(UID2654)
4013HR_0218_048_H7	1	0	0	0	1	1	1	1	2	0	1	0	0	0	0	0	0	1	1	0	Bacteroidales	g__Bacteroides(UID2691)
4013HR_0218_048_H8	1	0	1	1	1	1	1	1	2	0	1	0	0	0	0	0	0	1	1	0	Bacteroidales	o__Bacteroidales(UID2657)
4013HR_0218_048_H9	1	0	1	1	1	1	1	1	2	0	1	0	0	0	0	0	0	1	1	0	Bacteroidales	o__Bacteroidales(UID2654)
[truncated: 11,665 more rows]
